# Supplementary material for: Repurposing eflornithine to treat a patient with a rare ODC1 gain-of-function variant disease
Source: eLife. 2021 Jul 20;10:e67097. doi: 10.7554/eLife.67097 (PMC8291972; doi:10.7554/eLife.67097)
Supplement: Source data 1. [file elife-67097-data1.xlsx]

## Sheet: Meta-Pediatric Information
Glossary of Terms
BIOCHEMICAL		Compound Name
CHEMICAL_ID		Unique Identifier for each biochemical
OrigScale		Values are normalized in terms of raw area counts. Note: for a single run day, this is equivalent to the raw data
Z-score		Biochemical score versus 866 sample pediatric reference cohort. Clinical samples without Z-scores for specific biochemicals indicates either the biochemical was not detected in the reference cohort and / or it was not detected in the specific clinical sample.
SUPER_PATHWAY		Biochemical classification at high level
SUB_PATHWAY		Biochemical classification resolved within super pathway
KEGG_ID		KEGG database identifier
HMDB_ID		HMDB database identifier
Platform		Arm of the Metabolon platform used to identify each biochemical
Meta-Pediatric Analytical Methods
Meta-Pediatric identifies small molecules (between 50-1,500 Daltons (Da) in molecular weight) in patient samples. This identification is performed using four different types of high-performance Ultra Performance Liquid Chromatography (UPLC) instruments paired with Mass Spectrometry (UPLC/ MS).(1,2) The identification of each molecule is confirmed against a proprietary chemical library consisting …
Intended Use
Meta-Pediatric analysis of plasma may identify alterations in metabolic pathways. This is NOT a stand-alone test. In making the biochemical assessment, the clinician should not rely on Meta-Pediatric alone, but rather should consider all analytical results, other laboratory tests, and the patient’s history, signs, and symptoms. Meta-Pediatric may be considered in the following situations:
1. Individuals with a non-specific clinical presentation suspected to be related to perturbation in a biochemical pathway. In these cases, the test:
●	May help to substantiate results from traditional methods such as targeted biochemical analyses and exome sequencing.
●	May help to clarify equivocal results that were produced as a result of routine analytical testing (e.g. discrepant targeted biochemical analysis, genetics variant of unknown significance, etc.).
●	May be used to probe for biochemical perturbations. In this case, the test results can be used to assist the clinician in choosing the appropriate tests.
●	May be used in cases where routine testing is negative and additional biochemical analysis may be required. In this case, the test results may identify perturbations that were not identified using the routine methods. Under these circumstances, the Meta-Pediatric results are used to guide further testing, and under no circumstance should the Meta-Pediatric results be used to provide a diagnosis.
2. Individuals with equivocal molecular test results in a gene known to be involved in small molecule metabolism.
Reporting of Results
●	The UPLC/MS signal intensity of each biochemical in the panel is compared to the signal intensities of the biochemical in a reference cohort to calculate a Z-score. The Z-score is a statistical measurement of a score’s relationship to the mean in a group of scores and is representative of the standard deviations away from the mean of the reference cohort. The Z-Score calculation (Xi-meanref)/SDre…
●	In Meta-Pediatric, the Z-score cut-off points for being out of range are >2 or <-2. These values are based on the quintiles of the normal distribution, respectively approximating the upper 2.5% and lower 2.5% of the distribution.
●	The reference cohort consists of 866 pediatric patient samples. For construction of the reference cohort, molecules in the top 5% and bottom 5% of Z-scores for each individual sample were excluded from the reference population database.
Limitations
The following limitations of the test must be understood when analyzing the test data:
●	The Meta-Pediatric has been analytically validated according to Clinical Laboratory Improvement Amendment (CLIA) regulations (42 CFR 493). The test is not clinically validated. Biochemical alterations do not indicate the presence or absence of disease.
●	Failure to detect a compound is not evidence of its absence in the sample.
●	Failure to identify a particular small molecule may occur for a number of reasons including, but not limited to: (i) low concentration, (ii) interference from other compounds in the sample masking identification, or (iii) the requirement for special extraction or chromatographic methods.
●	Some biochemicals are not typically present at detectable levels in samples from normal/healthy individuals. Since these compounds are very sparse or absent in healthy controls, the calculation of a relative increase (e.g. > 2 Z-score) in a patient sample compared to the reference control cohort is not reliable; however, the presence of these molecules in patient samples can be indicative of a me…
●	All molecules listed in this report are contained in Metabolon’s proprietary chemical library and, with the exception of those with an asterisk (*), have been verified with authentic reference standards. In multiple analytical validation studies, Metabolon has verified the analytical performance of 258 molecules in plasma. Other molecules are chemically/structurally similar to analytically valida…
●	Some biochemicals are not typically present at detectable levels in samples from normal/healthy individuals. Since these compounds are very sparse or absent in healthy controls, the calculation of a relative increase (e.g. > 2 Z-score) in a patient sample compared to the reference control cohort is not reliable; however, the presence of these molecules in patient samples can be indicative of a me…
●	Based on our best knowledge, some reported molecules have unknown or non-specific clinical significance.
●	While quality control samples and internal reference standards are included in each analytical batch to identify unacceptable instrument performance and to monitor overall process variation, the QC may not detect all sources of variability in this global analysis such as matrix effect and carryover.
●	Hemolysis (red blood cell lysis), high lipid content, and/or high protein levels in plasma samples can interfere with the identification and relative quantitation of several biochemicals. Sample collection, processing, and shipping instructions should be carefully followed to avoid hemolysis.
●	Medications, both over-the-counter and prescription, as well as nutritional interventions, affect the levels of several metabolites and biochemical pathways. These interventions should be noted and considered by the patient’s clinician / physician when analyzing the data.
●	Dietary status affects the biochemical levels of several metabolites and activities of several metabolic pathways. The non-fasted/fasted status of an individual should be considered by the patient’s clinician / physician when analyzing the results.
Disclaimer
This test was developed and its performance characteristics determined by Metabolon, Inc. It has not been cleared or approved by the U.S. Food and Drug Administration. Metabolon is regulated under the Clinical Laboratory Improvement Amendments (CLIA) and the College of American Pathologists (CAP) as an accredited laboratory to perform high complexity clinical testing. CLIA# 34D2017656, CAP #75311…
© 2018 Metabolon, Inc. All rights reserved. Meta-Pediatric, the Metabolon name, logo and related trademarks and service marks, owned by Metabolon, Inc. are registered and/or used in the United States and many foreign countries. Any use, copying or reproduction of the trademarks, logos, information, images or designs contained in this document is strictly prohibited without the prior written permi…
(1) Evans AM et al. Anal Chem. 2009;81(16):6656-67 doi: 10.1021/ac901536h PMID:19624122
(2) Evans AM et al. Metabolomics. 2014;4(132) doi: 10.4172/2153-0769.1000132
(3) Dehaven CD et al. J Cheminform. 2010;2(1):9 doi: 10.1186/1758-2946-2-9 PMCID:PMC2984397
Meta-Pediatric RPT v1.0 02-18

## Sheet: Explanation
	OrigScale	values are normalized in terms of raw area counts.
		Note: for a single day run, this is equivalent to the raw data
	Z-scores	Z-scores are calculated as the number of standard deviations from the mean of the normal reference cohort
		-3.3413	Green: indicates a z-score less than -2 based on the theoretical quintiles of a normal distribution
		2.8131	Red: indicates a z-score greater than 2 based on the theoretical quintiles of a normal distribution
	* indicates compounds that have not been officially confirmed based on a standard, but we are confident in its identity

## Sheet: OrigScale
1184	phenylacetylcarnitine	Peptide	Acetylated Peptides	48425	LC/MS Pos Early	3092	280.154	101724840	287108-21-8			1809805	3692567	2672706	1753735	1740663	4120469
1187	phenylacetylglutamine	Peptide	Acetylated Peptides	35126	LC/MS Pos Early	2145	265.118	92258	28047-15-6	C04148	HMDB0006344	33993168	56136116	43998344	36650228	29242740	65188712
1190	phenylacetylglycine	Peptide	Acetylated Peptides	33945	LC/MS Neg	2375	192.067	68144	500-98-1	C05598	HMDB0000821	25161.5	107505	69728	74374	145992	90232
29	alanine	Amino Acid	Alanine and Aspartate Metabolism	1126	LC/MS Pos Early	1700	90.055	5950	56-41-7	C00041	HMDB0000161	694486848	662705664	711019392	713571904	594549440	891950144
40	asparagine	Amino Acid	Alanine and Aspartate Metabolism	512	LC/MS Pos Early	1225	133.061	6267	70-47-3	C00152	HMDB0000168	114268520	137202960	157290192	146426832	162507648	206892080
36	aspartate	Amino Acid	Alanine and Aspartate Metabolism	443	LC/MS Pos Early	1165	134.045	5960	56-84-8	C00049	HMDB0000191	16092668	19726432	18281956	10786207	11320320	16305133
43	hydroxyasparagine	Amino Acid	Alanine and Aspartate Metabolism	62060	LC/MS Pos Early	1149	149.056	15991574		C20631	HMDB32332	794477	912816	737339	698874	673212	657085
31	N-acetylalanine	Amino Acid	Alanine and Aspartate Metabolism	1585	LC/MS Neg	861	130.051	88064	97-69-8	C02847	HMDB0000766	2962402	2917175	2209008	2518210	2833412	2843486
37	N-acetylaspartate (NAA)	Amino Acid	Alanine and Aspartate Metabolism	22185	LC/MS Polar	3143	174.041	65065	997-55-7;997-55-7	C01042	HMDB0000812	8033070	9766808	10884008	12223603	7489061	4551662
1431	erythronate*	Carbohydrate	Aminosugar Metabolism	42420	LC/MS Polar	2186	135.03	2781043	88759-55-1		HMDB0000613	138960784	163034880	142584944	128980512	89491760	77651360
1406	glucuronate	Carbohydrate	Aminosugar Metabolism	15443	LC/MS Polar	3233.3	193.035	441478;94715;23677976;65041;444791	207300-70-7	C16245	HMDB0000127	2051251	2739802	2768717	2079938	2690706	1964564
1433	N-acetylglucosamine/N-acetylgalactosamine	Carbohydrate	Aminosugar Metabolism	46539	LC/MS Pos Early	715	222.097	84265;439174		C01074	HMDB0000212,HMDB0000215	638515	618718	734137	391684	434483	428702
1430	N-acetylglucosaminylasparagine	Carbohydrate	Aminosugar Metabolism	48149	LC/MS Pos Early	1212	336.14	123826	2776-93-4	C04540	HMDB0000489	193201	170393	176000	209264	238912	301532
1418	N-acetylneuraminate	Carbohydrate	Aminosugar Metabolism	32377	LC/MS Pos Early	660	310.113	439197	131-48-6	C00270	HMDB0000230	1893140	2140414	1933633	1294684	1358762	2373339
3339	16a-hydroxy DHEA 3-sulfate	Lipid	Androgenic Steroids	38168	LC/MS Neg	4240	383.153	20848950			HMDB0062544	407307	641348	408982	544067	414505	448166
3380	5alpha-androstan-3alpha,17beta-diol disulfate	Lipid	Androgenic Steroids	37184	LC/MS Neg	4275	225.07	56639109			HMDB0094682
3378	5alpha-androstan-3alpha,17beta-diol monosulfate (1)	Lipid	Androgenic Steroids	37186	LC/MS Neg	4925	371.19	121596226;121596225
3379	5alpha-androstan-3alpha,17beta-diol monosulfate (2)	Lipid	Androgenic Steroids	37185	LC/MS Neg	5080	371.19	121596225
3389	5alpha-androstan-3beta,17alpha-diol disulfate	Lipid	Androgenic Steroids	37187	LC/MS Neg	4215	225.07	56639109			HMDB0094682
3386	5alpha-androstan-3beta,17beta-diol disulfate	Lipid	Androgenic Steroids	37190	LC/MS Neg	3880	225.07	90186325	571-20-0	C12525	HMDB00493	169907	225929	67342	91322	216194	221265
3385	5alpha-androstan-3beta,17beta-diol monosulfate (2)	Lipid	Androgenic Steroids	37192	LC/MS Neg	4685	371.19
3393	andro steroid monosulfate C19H28O6S (1)*	Lipid	Androgenic Steroids	32827	LC/MS Neg	3871	383.153	159663			HMDB0002759
3367	androstenediol (3alpha, 17alpha) monosulfate (2)	Lipid	Androgenic Steroids	37207	LC/MS Neg	4712	369.174										25986
3368	androstenediol (3alpha, 17alpha) monosulfate (3)	Lipid	Androgenic Steroids	37209	LC/MS Neg	5180	369.174					590668	663904	458545	555677	601122	597643
3363	androstenediol (3beta,17beta) disulfate (1)	Lipid	Androgenic Steroids	37202	LC/MS Neg	3740	224.062	87120982		C04295	HMDB0240313	2486470	3015841	2067883	1879725	2109612	2051726
3364	androstenediol (3beta,17beta) disulfate (2)	Lipid	Androgenic Steroids	37203	LC/MS Neg	4065	224.062	87120982			HMDB0240313	634141	901753	348231	653551	732438	727139
3360	androstenediol (3beta,17beta) monosulfate (1)	Lipid	Androgenic Steroids	37211	LC/MS Neg	4535	369.174	13847309;129670631	521-17-5		HMDB0240429	124707	80763	111224	133650	143188	139763
3361	androstenediol (3beta,17beta) monosulfate (2)	Lipid	Androgenic Steroids	37210	LC/MS Neg	4500	369.174				HMDB0186954,HMDB0240429	27468	23564			32915
3350	androsterone sulfate	Lipid	Androgenic Steroids	31591	LC/MS Neg	5022	369.174	159663	2479-86-9		HMDB0002759	2862001	2524631	1764042	2425299	3659516	3926056
3337	dehydroepiandrosterone sulfate (DHEA-S)	Lipid	Androgenic Steroids	32425	LC/MS Neg	4745	367.159	12594	651-48-9	C04555	HMDB0001032	3717293	4477970	3498398	4168546	4110741	4193419
3342	epiandrosterone sulfate	Lipid	Androgenic Steroids	33973	LC/MS Neg	4855	369.174	9929317	22229-22-7	C04555	HMDB0062657	555143	600107	392230	571645	860032	898306
3353	etiocholanolone glucuronide	Lipid	Androgenic Steroids	47112	LC/MS Neg	4915	465.249	270605	3602-09-03		HMDB0004484		21150
4356	gulonate*	Cofactors and Vitamins	Ascorbate and Aldarate Metabolism	46957	LC/MS Polar	2750	195.051	152304	20246-53-1	C00800	HMDB0003290	1670708	1699389	2210313	1449928	2079040	1442241
4355	oxalate (ethanedioate)	Cofactors and Vitamins	Ascorbate and Aldarate Metabolism	20694	LC/MS Neg	603	88.988	971	144-62-7	C00209	HMDB0002329	10567680	10844879	14253234	10961530	24799380	24728244
4352	threonate	Cofactors and Vitamins	Ascorbate and Aldarate Metabolism	27738	LC/MS Polar	2384	135.03	5460407;151152	70753-61-6	C01620	HMDB0000943,HMDB0062620	58586160	50087552	56683108	49123636	79434008	226826912
5327	N-methylpipecolate	Xenobiotics	Bacterial/Fungal	47101	LC/MS Pos Early	1932	144.102	11286529	41447-17-0			2021737	4050853	2760117	3629922	3071276	4464341
4519	2-ethylphenylsulfate	Xenobiotics	Benzoate Metabolism	36847	LC/MS Neg	3416	201.023
4465	2-hydroxyhippurate (salicylurate)	Xenobiotics	Benzoate Metabolism	18281	LC/MS Neg	2184	194.046	10253	487-54-7	C07588	HMDB0000840	223807	97762	292808	113764	202852	221991
4570	3-(3-hydroxyphenyl)propionate	Xenobiotics	Benzoate Metabolism	35635	LC/MS Neg	1980	165.056	91	621-54-5	C11457	HMDB0000375	595769	480284	430509			118547
4567	3-(3-hydroxyphenyl)propionate sulfate	Xenobiotics	Benzoate Metabolism	45415	LC/MS Neg	1294	245.012	187488	86321-32-6		HMDB0094710	104384	130933	75880
4572	3-(4-hydroxyphenyl)propionate	Xenobiotics	Benzoate Metabolism	39587	LC/MS Neg	1670	165.056	10394	501-97-3	C01744	HMDB0002199
4467	3-hydroxyhippurate	Xenobiotics	Benzoate Metabolism	39600	LC/MS Neg	1687	194.046	450268	1637-75-8		HMDB0006116	1732132	1531863	1841488	133469	249846	457452
4540	3-methoxycatechol sulfate (1)	Xenobiotics	Benzoate Metabolism	48763	LC/MS Neg	2163	218.997	129892430				4579493	968429	1671992	747544	2380935	2597971
4541	3-methoxycatechol sulfate (2)	Xenobiotics	Benzoate Metabolism	48752	LC/MS Neg	2200	218.997					472490	176399	348711	197424	272787	190796
4501	3-methyl catechol sulfate (1)	Xenobiotics	Benzoate Metabolism	46165	LC/MS Neg	2790	203.002	118431379				114143	89929	247611	170318	190101	296937
4502	3-methyl catechol sulfate (2)	Xenobiotics	Benzoate Metabolism	46164	LC/MS Neg	2860	203.002
4573	3-phenylpropionate (hydrocinnamate)	Xenobiotics	Benzoate Metabolism	15749	LC/MS Neg	2860	149.061	107	501-52-0	C05629	HMDB0000764	135896		268591	377860	289091	369401
4516	4-acetylphenyl sulfate	Xenobiotics	Benzoate Metabolism	44620	LC/MS Neg	2375	215.002	4684006				150728	163820	181760	161867	105662	142162
4522	4-ethylphenyl sulfate	Xenobiotics	Benzoate Metabolism	36099	LC/MS Neg	3580	201.023	20822574	123-07-9	C13637	HMDB0062551	5.38002e+06	5.17857e+06	486836	302315	844398	1.00679e+06
4469	4-hydroxyhippurate	Xenobiotics	Benzoate Metabolism	35527	LC/MS Neg	1475	194.046	151012	2482-25-9		HMDB0013678	1382413	1384353	1504183	677005	945427	1209355
4504	4-methylcatechol sulfate	Xenobiotics	Benzoate Metabolism	46146	LC/MS Neg	2665	203.002	54104170			HMDB0240459	61485028	56315544	40589232	39321136	39195716	77865984
4524	4-vinylphenol sulfate	Xenobiotics	Benzoate Metabolism	36098	LC/MS Neg	3320	199.007	6426766	2628-17-3	C05627	HMDB0062775	782171	804377	5119759	1771335	2089569	1640379
4475	benzoate	Xenobiotics	Benzoate Metabolism	15778	LC/MS Neg	1750	121.029	243	65-85-0	C00180	HMDB0001870	772626	660713	749314	559318	633897	578427
4497	catechol sulfate	Xenobiotics	Benzoate Metabolism	35320	LC/MS Neg	1906	188.986	3083879	4918-96-1		HMDB0059724	46838552	22606844	73100144	45064976	52539476	60004916
4500	guaiacol sulfate	Xenobiotics	Benzoate Metabolism	46111	LC/MS Neg	2344	203.002	22473			HMDB0060013	7055673	3156224	11526169	12461305	5925389	9434156
4461	hippurate	Xenobiotics	Benzoate Metabolism	15753	LC/MS Neg	2106.9	178.051	464	495-69-2	C01586	HMDB0000714	151868288	6909681	35695624	11687433	52336104	43228896
4543	methyl-4-hydroxybenzoate sulfate	Xenobiotics	Benzoate Metabolism	48429	LC/MS Neg	2873	230.997	10657183			HMDB0041646	123040	90945	231994	132659	122135	7457455
4558	o-cresol sulfate	Xenobiotics	Benzoate Metabolism	36845	LC/MS Neg	2796	187.007	11615528			HMDB0011635	28764		57539	48918	49785	41929
4551	p-cresol sulfate	Xenobiotics	Benzoate Metabolism	36103	LC/MS Neg	2890	187.007	4615423	3233-57-7		HMDB0011635	653423232	884471360	697042112	604130112	544664448	1037479168
4545	propyl 4-hydroxybenzoate sulfate	Xenobiotics	Benzoate Metabolism	48460	LC/MS Neg	3971	259.028	131838881	162338-10-5		HMDB0135261
1932	carnitine	Lipid	Carnitine Metabolism	15500	LC/MS Pos Early	1978	162.113	288	461-05-2	C00487,C00308	HMDB0000062	1146899712	1255084416	1423664384	1470809728	1398689024	1446548096
1931	deoxycarnitine	Lipid	Carnitine Metabolism	36747	LC/MS Pos Early	2052	146.118	22620	6249-56-5	C01181	HMDB0001161	17765676	18143584	16607597	16545158	13636974	15493144
3051	ceramide (d16:1/24:1, d18:1/22:1)*	Lipid	Ceramides	57437	LC/MS Pos Late	3850	620.598					3947565	4125847	5146497	3763999	3965561	4901861
3047	ceramide (d18:1/14:0, d16:1/16:0)*	Lipid	Ceramides	57432	LC/MS Pos Late	2477	510.488					751768	1601694	811416	1566361	963502	1492873
3052	ceramide (d18:2/24:1, d18:1/24:2)*	Lipid	Ceramides	57443	LC/MS Pos Late	3858	646.613					9845215	10862817	9562669	7761942	8150657	9696924
3021	N-palmitoyl-sphingosine (d18:1/16:0)	Lipid	Ceramides	44877	LC/MS Pos Late	2893	538.519	5283564	24696-26-2		HMDB0004949	13822734	17304266	15401202	14500823	14035709	16590196
3025	N-stearoyl-sphingosine (d18:1/18:0)*	Lipid	Ceramides	54979	LC/MS Pos Late	3392	566.551	5283565	104404-17-3		HMDB0004950	3346027	4013263	3840112	3670636	3159671	4500072
6217	1,2,3-benzenetriol sulfate (2)	Xenobiotics	Chemical	48762	LC/MS Neg	1709	204.981	54110629;92013662			HMDB0060018,HMDB0060016	2085975	236207	311593	107023	228670	284927
6219	2-methoxyresorcinol sulfate	Xenobiotics	Chemical	48445	LC/MS Neg	1863	218.997		1446269-78-8			1172639	502911	425214	259198	1151330	2089728
6220	3-hydroxypyridine sulfate	Xenobiotics	Chemical	48448	LC/MS Neg	1595.5	173.987		1955-23-3			158992	164606	600035	461946	313175	390751
6212	4-hydroxychlorothalonil	Xenobiotics	Chemical	48441	LC/MS Neg	4427	244.908	34217	28343-61-5			10480097	13577329	18317760	16958688	15172008	11982264
6234	6-hydroxyindole sulfate	Xenobiotics	Chemical	48698	LC/MS Neg	2498	212.002	122198196			HMDB0000682	2072875	2812029	2608524	1517835	1478413	2058127
6188	benzoylcarnitine*	Xenobiotics	Chemical	43265	LC/MS Pos Early	3041	266.139		105450-08-6
6151	dimethyl sulfone	Xenobiotics	Chemical	43424	LC/MS Pos Early	832	95.0161	6213	67-71-0	C11142	HMDB0004983	229407	214271	152326
6153	ectoine	Xenobiotics	Chemical	35651	LC/MS Pos Early	1980	143.082	126041	96702-03-3	C06231		691430	475053	858756	683436	2219788	675305
6154	EDTA	Xenobiotics	Chemical	22163	LC/MS Neg	643	291.083	6049	60-00-4	C00284	HMDB0015109	2888352768	1527633408	1231066112	2329197312	2314939904	3104156928
6092	ethyl glucuronide	Xenobiotics	Chemical	39603	LC/MS Neg	793	221.067	18392195	17685-04-0		HMDB0010325	99567	245689	78383	65115	1312304	142107
6162	HEPES	Xenobiotics	Chemical	21248	LC/MS Pos Early	1627	239.106	23831	7365-45-9			64374	74471	94364	183029	59791
6163	iminodiacetate (IDA)	Xenobiotics	Chemical	21025	LC/MS Pos Early	830	134.045	8897	142-73-4	C19911	HMDB0011753	196487024	151701616	184592544	453577728	951065856	127866576
6088	O-sulfo-L-tyrosine	Xenobiotics	Chemical	45413	LC/MS Neg	990	260.023	514186				973218	893779	770010	730097	858623	686128
6189	perfluorooctanesulfonate (PFOS)	Xenobiotics	Chemical	57564	LC/MS Polar	662	498.93	74483	1763-23-1	C18142	HMDB0059586	323309	434747	358801	368900	239790	332962
6199	succinamic acid	Xenobiotics	Chemical	64301	LC/MS Polar	2230	116.035		638-32-4			356012	297771	241264	358825	249975	286714
6085	sulfate*	Xenobiotics	Chemical	46960	LC/MS Neg	616	96.9601	5152822	14808-79-8	C00059	HMDB01448	52956428	67128280	66623140	53672888	66321664	53380324
6238	thioproline	Xenobiotics	Chemical	53231	LC/MS Pos Early	1250	134.027	93176	34592-47-4			8527539	4978972	5740381	6120777	7959110	25053708
3305	cortisol	Lipid	Corticosteroids	1712	LC/MS Neg	4710	361.202	5754	50-23-7	C00735	HMDB0000063	794056	146615	69538	192284	158849	294702
3315	cortisone	Lipid	Corticosteroids	1769	LC/MS Neg	4575	359.186	222786	53-06-5	C00762	HMDB0002802	159134			82503	40523	105873
528	creatine	Amino Acid	Creatine Metabolism	27718	LC/MS Pos Early	1947	132.077	586	57-00-1	C00300	HMDB0000064	575723776	772139520	632633920	580892160	628572096	701314688
529	creatinine	Amino Acid	Creatine Metabolism	513	LC/MS Pos Early	2055	114.066	588	60-27-5	C00791	HMDB0000562	279996256	288067456	274519104	264612592	324704544	271453760
527	guanidinoacetate	Amino Acid	Creatine Metabolism	43802	LC/MS Pos Early	1937	118.061	763	352-97-6	C00581	HMDB0000128	462245	339334	1325298	460872	244385
2889	diacylglycerol (16:1/18:2 [2], 16:0/18:3 [1])*	Lipid	Diacylglycerol	54966	LC/MS Pos Late	2733	608.525					1664469	2297898	1668430	1158629	1299274	1064488
2941	linoleoyl-arachidonoyl-glycerol (18:2/20:4) [1]*	Lipid	Diacylglycerol	54955	LC/MS Pos Late	2590	658.54	9543796			HMDB0007257	7911354	9461245	6155185	6393263	6020096	5515281
2942	linoleoyl-arachidonoyl-glycerol (18:2/20:4) [2]*	Lipid	Diacylglycerol	54956	LC/MS Pos Late	2650	658.54	9543796			HMDB0007257	4440629	2485503	4064529	1199724	3948825	1283712
2934	linoleoyl-linolenoyl-glycerol (18:2/18:3) [2]*	Lipid	Diacylglycerol	54964	LC/MS Pos Late	2478	632.525	9543737			HMDB0007250	3840167	6104708	2327652	3173517	2759089	3160734
2931	linoleoyl-linoleoyl-glycerol (18:2/18:2) [1]*	Lipid	Diacylglycerol	54968	LC/MS Pos Late	2720	634.54	9543729			HMDB0007248	16352755	27926226	8249029	12881593	7068204	9693765
2940	oleoyl-arachidonoyl-glycerol (18:1/20:4) [2]*	Lipid	Diacylglycerol	54961	LC/MS Pos Late	2990	660.556	9543786			HMDB0007228	4128178	3650633	4820907	1568432	4420956	2100760
2926	oleoyl-linoleoyl-glycerol (18:1/18:2) [1]	Lipid	Diacylglycerol	46798	LC/MS Pos Late	3115	636.556	14275396	106292-55-1		HMDB0007219	29590652	49638948	21553610	26146264	17093600	19783612
2927	oleoyl-linoleoyl-glycerol (18:1/18:2) [2]	Lipid	Diacylglycerol	46799	LC/MS Pos Late	3223	636.556	71433693	104346-53-4		HMDB0007219	50858640	70257752	39958960	35830664	28916808	28116434
2924	oleoyl-oleoyl-glycerol (18:1/18:1) [2]*	Lipid	Diacylglycerol	54946	LC/MS Pos Late	3695	638.572	9543716			HMDB0007218	13839592	16714256	9536721	8969029	9248205	8055586
2911	palmitoleoyl-linoleoyl-glycerol (16:1/18:2) [1]*	Lipid	Diacylglycerol	54967	LC/MS Pos Late	2664	608.525	9543699			HMDB0007132		624814		435611		291545
2914	palmitoyl-arachidonoyl-glycerol (16:0/20:4) [2]*	Lipid	Diacylglycerol	54958	LC/MS Pos Late	3015	634.54	9543736			HMDB0007112	167312		496717		322892
2906	palmitoyl-linoleoyl-glycerol (16:0/18:2) [1]*	Lipid	Diacylglycerol	52633	LC/MS Pos Late	3080	610.54	9543695			HMDB0007103	1721205	4192147	2356070	2677760	1286286	1826531
2907	palmitoyl-linoleoyl-glycerol (16:0/18:2) [2]*	Lipid	Diacylglycerol	52634	LC/MS Pos Late	3197	610.54	131801744			HMDB0007103	4547245	7137549	5837548	4063628	2884441	3311837
2905	palmitoyl-oleoyl-glycerol (16:0/18:1) [2]*	Lipid	Diacylglycerol	54942	LC/MS Pos Late	3695	612.556	5282283		C13861	HMDB0007102	719167	1112841	1091621	693551	827758	585496
2937	stearoyl-arachidonoyl-glycerol (18:0/20:4) [1]*	Lipid	Diacylglycerol	57450	LC/MS Pos Late	3404	662.572	6438587		C00165	HMDB0007170	1049051	834794	1319948	1066418	924646	1026793
3009	N-palmitoyl-sphinganine (d18:0/16:0)	Lipid	Dihydroceramides	52604	LC/MS Pos Late	3090	540.535	5283572	5966-29-0		HMDB11760	1264338	2001686	1526006	1591978	1712356	1468483
3012	N-stearoyl-sphinganine (d18:0/18:0)*	Lipid	Dihydroceramides	1759	LC/MS Pos Late	3526	568.566	5283573	2304-80-5			366128	868106	786658	477470	674803	1679655
3100	behenoyl dihydrosphingomyelin (d18:0/22:0)*	Lipid	Dihydrosphingomyelins	57331	LC/MS Pos Late	3300	789.684	44260132			HMDB0012091	8861992	8051848	14727725	12606272	18273428	23986970
3098	myristoyl dihydrosphingomyelin (d18:0/14:0)*	Lipid	Dihydrosphingomyelins	57365	LC/MS Pos Late	2060	677.559	44260138			HMDB0012085	5407966	5379200	10645070	9844629	15919692	16454094
3099	palmitoyl dihydrosphingomyelin (d18:0/16:0)*	Lipid	Dihydrosphingomyelins	52434	LC/MS Pos Late	2290	705.591	9939965			HMDB0010168	83673488	84567464	110855304	91362104	131442528	130110432
3101	sphingomyelin (d18:0/18:0, d19:0/17:0)*	Lipid	Dihydrosphingomyelins	57473	LC/MS Pos Late	2500	733.622	44260130			HMDB0012087	10424642	10892997	17968958	16969936	29013350	34448684
3102	sphingomyelin (d18:0/20:0, d16:0/22:0)*	Lipid	Dihydrosphingomyelins	57476	LC/MS Pos Late	2850	761.653					6241329	6488814	11259577	9629496	15588859	19715098
674	alpha-glutamylalanine	Peptide	Dipeptide	41369	LC/MS Pos Early	2159	219.098	100098	21064-18-6		HMDB03764
733	cyclo(ala-pro)	Peptide	Dipeptide	47098	LC/MS Pos Early	1486	169.097	13879951				484881	438568	884224	678258	714113	321516
745	cyclo(gly-pro)	Peptide	Dipeptide	37077	LC/MS Pos Early	1349	155.082	193540	3705-27-9
762	cyclo(leu-pro)	Peptide	Dipeptide	37104	LC/MS Pos Early	2670	211.144	7074739	2873-36-1		HMDB0034276	68259	95107	100387	62310	145416
766	cyclo(met-pro)	Peptide	Dipeptide	52350	LC/MS Pos Early	2190	229.101	6502027	1355217-56-9
769	cyclo(phe-pro)	Peptide	Dipeptide	44875	LC/MS Pos Early	2766	245.129	443440	3705-26-8	C11847
783	cyclo(pro-val)	Peptide	Dipeptide	49795	LC/MS Pos Early	2098	197.129	98951	2854-40-2			493535	514766	759038	638720	452296	315857
822	glycylphenylalanine	Peptide	Dipeptide	33954	LC/MS Pos Early	3068	223.108	92953	3321-03-07		HMDB0028848
834	histidylalanine	Peptide	Dipeptide	42027	LC/MS Neg	970	225.099	101180	16874-75-2		HMDB0028878
847	isoleucylalanine	Peptide	Dipeptide	40046	LC/MS Pos Early	2742	203.139	7009577	24787-73-3		HMDB0028900	406493	330603	455582	490804	644665	453058
853	isoleucylglycine	Peptide	Dipeptide	40008	LC/MS Neg	1992	187.109	342532	868-28-0		HMDB0028907	346548	314433	385380	380545	502404	381788
1048	isoleucylleucine/leucylisoleucine	Peptide	Dipeptide	52322	LC/MS Pos Early	3242	245.186					284380	245771	297321	238876	332100	303539
872	leucylglycine	Peptide	Dipeptide	40045	LC/MS Pos Early	2778	189.123	79070	686-50-0		HMDB0028929	236474	125873	296024	254171	271059	323221
875	leucylleucine	Peptide	Dipeptide	36756	LC/MS Neg	3900	243.171	94244	3303-31-9	C11332	HMDB0028933			153860	97294		82118
1049	leucylphenylalanine/isoleucylphenylalanine	Peptide	Dipeptide	52415	LC/MS Neg	4073	277.156	6992310;435728			HMDB0013243,HMDB0028914		53956	48589		61008	79449
902	methionylalanine	Peptide	Dipeptide	40685	LC/MS Pos Early	2665	221.095	7009581	3061-96-9		HMDB0028966	153135	169894	139760		77564
931	phenylalanylphenylalanine	Peptide	Dipeptide	38150	LC/MS Neg	4292	311.14	6993090	2577-40-4			69218	71096	67635	67902	62280	53743
947	prolylglycine	Peptide	Dipeptide	40703	LC/MS Pos Early	2136	173.092	6426709	2578-57-6		HMDB0011178	783947	1022666	755683	630341	964175	705359
953	prolylproline	Peptide	Dipeptide	40731	LC/MS Pos Early	2555	213.123	263469	20488-28-2		HMDB0011180	808005	599757	927087	758903	1496181	1009041
954	prolylserine	Peptide	Dipeptide	40714	LC/MS Pos Early	2036	203.103	18218236	71835-80-8		HMDB0029026	1064616	1151080	1431434	1339513	1248632	682621
973	seryltyrosine	Peptide	Dipeptide	42077	LC/MS Neg	1436	267.099	7021866	21435-27-8		HMDB0029051
986	threonylphenylalanine	Peptide	Dipeptide	31530	LC/MS Neg	2322	265.119	7010580	16875-27-7		HMDB0029068
995	tryptophylasparagine	Peptide	Dipeptide	40661	LC/MS Neg	2320	317.125	18218248	175027-11-9		HMDB0029078
1028	valylalanine	Peptide	Dipeptide	41518	LC/MS Pos Early	2520	189.123	6992638	27493-61-4		HMDB0029120	255778	241092	310552	333222	356500	303002
1033	valylglutamine	Peptide	Dipeptide	42079	LC/MS Neg	1484	244.13	5253209	42854-54-6		HMDB0029125	50837	37988	109934	87365	170486	63188
1034	valylglycine	Peptide	Dipeptide	40475	LC/MS Neg	1506	173.093	136487	686-43-1		HMDB0029127	431536	407772	572123	587154	637574	521198
1037	valylleucine	Peptide	Dipeptide	39994	LC/MS Pos Early	3138	231.17	352039	22906-55-4		HMDB0029131
1325	sucrose	Carbohydrate	Disaccharides and Oligosaccharides	1519	LC/MS Neg	865	341.109	5988	57-50-1	C00089	HMDB0000258	397628	441758	1188269	683350	620080	957308
5378	2-hydroxyacetaminophen sulfate*	Xenobiotics	Drug - Analgesics, Anesthetics	33173	LC/MS Neg	1674	246.008	86290013			HMDB0062547	13084667		57468072	6073025	670317	920146
5394	2-hydroxyibuprofen	Xenobiotics	Drug - Analgesics, Anesthetics	43330	LC/MS Neg	3462	221.118	10443535	51146-55-5		HMDB0060920
5380	2-methoxyacetaminophen glucuronide*	Xenobiotics	Drug - Analgesics, Anesthetics	33161	LC/MS Neg	1633	356.099	121596203			HMDB0240215	366996		3130698	133196
5379	2-methoxyacetaminophen sulfate*	Xenobiotics	Drug - Analgesics, Anesthetics	47031	LC/MS Neg	1949	260.023	86290014			HMDB0062550	2327533		11628956	878085	114209	151952
5381	3-(cystein-S-yl)acetaminophen*	Xenobiotics	Drug - Analgesics, Anesthetics	34365	LC/MS Pos Early	2420	271.075	171264			HMDB0240217			5637810
5375	3-(N-acetyl-L-cystein-S-yl) acetaminophen	Xenobiotics	Drug - Analgesics, Anesthetics	45721	LC/MS Neg	2094	311.071	83967	52372-86-8			713269		3640705	266357		27229
5373	4-acetamidophenol	Xenobiotics	Drug - Analgesics, Anesthetics	12032	LC/MS Neg	2173.7	150.056	1983	103-90-2	C06804	HMDB0001859	2786783		32572396	1723667	84230	165057
5377	4-acetamidophenylglucuronide	Xenobiotics	Drug - Analgesics, Anesthetics	15736	LC/MS Neg	1400	326.088	83944;4022661	120595-80-4		HMDB0010316	2725187		36358088	1380592	100578	105213
5376	4-acetaminophen sulfate	Xenobiotics	Drug - Analgesics, Anesthetics	37475	LC/MS Neg	1792	230.013	83939	10066-90-7;32113-41-0	C06804	HMDB0059911	26563374		141173184	16477689	1165563	1426912
5388	4-aminophenol sulfate (2)	Xenobiotics	Drug - Analgesics, Anesthetics	54809	LC/MS Neg	1168	188.002					273995		2756248	49221
5396	carboxyibuprofen	Xenobiotics	Drug - Analgesics, Anesthetics	43333	LC/MS Neg	1920	235.098	10444113	15935-54-3		HMDB0060564
5393	ibuprofen	Xenobiotics	Drug - Analgesics, Anesthetics	17799	LC/MS Neg	4925	205.123	3672	15687-27-1	C01588	HMDB0001925
5398	ibuprofen acyl glucuronide	Xenobiotics	Drug - Analgesics, Anesthetics	38366	LC/MS Neg	4976	381.156	163959	115075-59-7		HMDB0010343
5403	salicyluric glucuronide*	Xenobiotics	Drug - Analgesics, Anesthetics	33384	LC/MS Neg	1463	370.078	121596205			HMDB0240252
5456	amoxicillin	Xenobiotics	Drug - Antibiotic	52948	LC/MS Neg	2365	364.097	33613	26787-78-0	D00229,C06827,DG00520	HMDB0015193			1409386
5654	4-hydroxycoumarin	Xenobiotics	Drug - Cardiovascular	37445	LC/MS Neg	2470	161.024	54682930	1076-38-6	C20414		1548467	3674162	1893368	2116134	2054559	1862541
5748	dexlansoprazole	Xenobiotics	Drug - Gastrointestinal	57668	LC/MS Pos Late	827	370.083	9578005	138530-94-6	D08903							7005327
5830	levetiracetam	Xenobiotics	Drug - Neurological	57641	LC/MS Pos Early	1925	171.113	5284583	102767-28-2	C07841	HMDB0015333
5933	cetirizine	Xenobiotics	Drug - Respiratory	54745	LC/MS Pos Late	1052	389.163	2678	83881-51-0	C07778	HMDB0005032			61875420		26193584	47491500
5947	guaifenesin	Xenobiotics	Drug - Respiratory	43390	LC/MS Pos Early	2656	199.096	3516	93-14-1	D00337	HMDB0004998			2141626	7253569
5964	hydroquinone sulfate	Xenobiotics	Drug - Topical Agents	35322	LC/MS Neg	1395	188.986	161220	123-31-9	C00530	HMDB0240263	95103	711286	770973	558608	159629	650711
5958	salicylate	Xenobiotics	Drug - Topical Agents	1515	LC/MS Polar	802	137.024	338	69-72-7	C00805	HMDB0001895	1277944	530485	1185560	696172	954941	1315234
2182	linoleoyl ethanolamide	Lipid	Endocannabinoid	52608	LC/MS Neg	6150	322.275	5283446	68171-52-8		HMDB0012252		280805	45985
2196	N-oleoylserine	Lipid	Endocannabinoid	57664	LC/MS Neg	5600	368.281	44190514					81320	65298
2172	N-oleoyltaurine	Lipid	Endocannabinoid	39732	LC/MS Neg	5610	388.253	6437033	52514-04-2
2198	N-palmitoylserine	Lipid	Endocannabinoid	57659	LC/MS Neg	5557	342.265	6453686	58725-46-5;474943-14-1					445804	168369	365274	93268
2174	N-palmitoyltaurine	Lipid	Endocannabinoid	39835	LC/MS Neg	5560	362.237	14504290	83982-06-3
2173	N-stearoyltaurine	Lipid	Endocannabinoid	39730	LC/MS Neg	5782	390.268	168274	63155-80-6
2159	oleoyl ethanolamide	Lipid	Endocannabinoid	38102	LC/MS Neg	6450	324.291	5283454	11-58-0;111-58-0		HMDB0002088	383944	605661	182104		182635
2162	palmitoyl ethanolamide	Lipid	Endocannabinoid	38165	LC/MS Neg	6300	298.275	4671	544-31-0	C16512	HMDB0002100	823949	1083379	934151	745952	674593	653883
2163	stearoyl ethanolamide	Lipid	Endocannabinoid	38625	LC/MS Pos Late	1787	328.321	27902	111-57-9		HMDB0013078	454374	551969	429836	388555	435203	377465
1907	adipoylcarnitine (C6-DC)	Lipid	Fatty Acid Metabolism (Acyl Carnitine, Dicarboxylate)	52988	LC/MS Pos Early	2570	290.16	71296139			HMDB0061677	362958	1010279	191814	281970	981007	627500
1914	pimeloylcarnitine/3-methyladipoylcarnitine (C7-DC)	Lipid	Fatty Acid Metabolism (Acyl Carnitine, Dicarboxylate)	53224	LC/MS Pos Early	2773	304.175					205900	319687	129522	142700	276263	200221
1915	suberoylcarnitine (C8-DC)	Lipid	Fatty Acid Metabolism (Acyl Carnitine, Dicarboxylate)	52990	LC/MS Pos Early	2964	318.191						270122			1666791
1919	(R)-3-hydroxybutyrylcarnitine	Lipid	Fatty Acid Metabolism (Acyl Carnitine, Hydroxy)	43264	LC/MS Pos Early	2400	248.149	53481617			HMDB0013127	824477	6601801		1174753	2642262	824158
1920	(S)-3-hydroxybutyrylcarnitine	Lipid	Fatty Acid Metabolism (Acyl Carnitine, Hydroxy)	52984	LC/MS Pos Early	2340	248.149	71464477			HMDB0013127	1181503	4738601	1043486	836816	3984576	1122988
1867	arachidoylcarnitine (C20)*	Lipid	Fatty Acid Metabolism (Acyl Carnitine, Long Chain Saturated)	57513	LC/MS Pos Late	1512	456.405	53477833			HMDB0006460	381144	609373	596425	436062	400003	585948
1868	behenoylcarnitine (C22)*	Lipid	Fatty Acid Metabolism (Acyl Carnitine, Long Chain Saturated)	57514	LC/MS Pos Late	1561	484.436	71464577			HMDB0062468	322244	568831	444126	391129	366658	397963
1870	cerotoylcarnitine (C26)*	Lipid	Fatty Acid Metabolism (Acyl Carnitine, Long Chain Saturated)	57516	LC/MS Pos Late	1649	540.499	53477828			HMDB0006347	2825008	3177049	3372592	3343560	4000276	3709026
1869	lignoceroylcarnitine (C24)*	Lipid	Fatty Acid Metabolism (Acyl Carnitine, Long Chain Saturated)	57515	LC/MS Pos Late	1603	512.467					2895405	3789057	3500083	3300006	2884288	2643825
1865	margaroylcarnitine (C17)*	Lipid	Fatty Acid Metabolism (Acyl Carnitine, Long Chain Saturated)	57512	LC/MS Pos Late	1424	414.358	53477803	106182-29-0		HMDB0006210	236584	471692	429999	230966	254351	222889
1862	myristoylcarnitine (C14)	Lipid	Fatty Acid Metabolism (Acyl Carnitine, Long Chain Saturated)	33952	LC/MS Pos Late	1350	372.311	6426854	18822-89-4		HMDB000506	1515367	3718803	1945193	2130983	1071956	1473836
1864	palmitoylcarnitine (C16)	Lipid	Fatty Acid Metabolism (Acyl Carnitine, Long Chain Saturated)	44681	LC/MS Pos Late	1425	400.342	461	6865-14-1	C02990	HMDB0000222	6743954	10775892	9473041	7677419	6971272	9358096
1866	stearoylcarnitine (C18)	Lipid	Fatty Acid Metabolism (Acyl Carnitine, Long Chain Saturated)	34409	LC/MS Pos Late	1485	428.373	3006797	18822-91-8		HMDB0000848	2839503	5201360	4214305	3791035	3048151	4380791
1860	decanoylcarnitine (C10)	Lipid	Fatty Acid Metabolism (Acyl Carnitine, Medium Chain)	33941	LC/MS Pos Late	1130	316.248	10245190	1492-27-9		HMDB0000651	13148878	36349208	6521860	10215440	11659593	6200040
1844	hexanoylcarnitine (C6)	Lipid	Fatty Acid Metabolism (Acyl Carnitine, Medium Chain)	32328	LC/MS Pos Early	3358	260.186	6426853	6920-35-0		HMDB0000756	1723965	4089199	1298535	1699664	4037909	2146707
1861	laurylcarnitine (C12)	Lipid	Fatty Acid Metabolism (Acyl Carnitine, Medium Chain)	34534	LC/MS Pos Late	1235	344.279	168381	25518-54-1		HMDB000225	3096705	9046647	2413125	3204149	3820903	2611558
1852	octanoylcarnitine (C8)	Lipid	Fatty Acid Metabolism (Acyl Carnitine, Medium Chain)	33936	LC/MS Pos Late	950	288.217	11953814;123701	3671-77-0	C02838	HMDB0000791	9253282	21376862	4599812	7382811	7711345	4972629
1880	cis-4-decenoylcarnitine (C10:1)	Lipid	Fatty Acid Metabolism (Acyl Carnitine, Monounsaturated)	38178	LC/MS Pos Late	1057	314.233	57357170	98930-66-6		HMDB0013205	12133092	24311908	6753876	9719020	4803821	6474626
1887	eicosenoylcarnitine (C20:1)*	Lipid	Fatty Acid Metabolism (Acyl Carnitine, Monounsaturated)	57519	LC/MS Pos Late	1484	454.389						1037343		334151		272153
1884	myristoleoylcarnitine (C14:1)*	Lipid	Fatty Acid Metabolism (Acyl Carnitine, Monounsaturated)	48182	LC/MS Pos Late	1316	370.295	129691961	889848-55-9		HMDB0240588	6918923	21961520	3717128	5338362	2289707	3675061
1889	nervonoylcarnitine (C24:1)*	Lipid	Fatty Acid Metabolism (Acyl Carnitine, Monounsaturated)	57531	LC/MS Pos Late	1602	510.452					669090	1211691	660798	660719	439084	545428
1886	oleoylcarnitine (C18:1)	Lipid	Fatty Acid Metabolism (Acyl Carnitine, Monounsaturated)	35160	LC/MS Pos Late	1423	426.358	6441392	38677-66-6		HMDB0005065	18689276	31380368	13309010	13732534	10100723	13146601
1885	palmitoleoylcarnitine (C16:1)*	Lipid	Fatty Acid Metabolism (Acyl Carnitine, Monounsaturated)	53223	LC/MS Pos Late	1357	398.327	71464547				2366520	4850008	1485529	1349155	904186	1254554
1890	ximenoylcarnitine (C26:1)*	Lipid	Fatty Acid Metabolism (Acyl Carnitine, Monounsaturated)	57517	LC/MS Pos Late	1607	538.483					2445810	3268413	2415129	1895062	2148359	1609607
1899	adrenoylcarnitine (C22:4)*	Lipid	Fatty Acid Metabolism (Acyl Carnitine, Polyunsaturated)	57528	LC/MS Pos Late	1415	476.373									80160
1894	arachidonoylcarnitine (C20:4)	Lipid	Fatty Acid Metabolism (Acyl Carnitine, Polyunsaturated)	57518	LC/MS Pos Late	1353	448.342	136212424			HMDB0006455	678344	791741	896764	670493	681873	665087
1895	dihomo-linolenoylcarnitine (C20:3n3 or 6)*	Lipid	Fatty Acid Metabolism (Acyl Carnitine, Polyunsaturated)	57521	LC/MS Pos Late	1392	450.358					716448	671962	1139145	767112	765917	747439
1893	dihomo-linoleoylcarnitine (C20:2)*	Lipid	Fatty Acid Metabolism (Acyl Carnitine, Polyunsaturated)	57520	LC/MS Pos Late	1436	452.373					478358	767682	434476	399237	323890	435835
1902	docosahexaenoylcarnitine (C22:6)*	Lipid	Fatty Acid Metabolism (Acyl Carnitine, Polyunsaturated)	57523	LC/MS Pos Late	1349	472.342					245648	223346	88695	79631	171431	315515
1900	docosapentaenoylcarnitine (C22:5n3)*	Lipid	Fatty Acid Metabolism (Acyl Carnitine, Polyunsaturated)	57529	LC/MS Pos Late	1387	474.358	71464594						73387	50499
1892	linolenoylcarnitine (C18:3)*	Lipid	Fatty Acid Metabolism (Acyl Carnitine, Polyunsaturated)	57511	LC/MS Pos Late	1310	422.327					1261603	1738433	874870	1058908	1015792	340842
1891	linoleoylcarnitine (C18:2)*	Lipid	Fatty Acid Metabolism (Acyl Carnitine, Polyunsaturated)	46223	LC/MS Pos Late	1430	424.342	6450015	36816-10-1		HMDB0006469	10817330	14269590	9781466	8916205	8981268	8885562
1840	acetylcarnitine (C2)	Lipid	Fatty Acid Metabolism (Acyl Carnitine, Short Chain)	32198	LC/MS Pos Early	2282	204.123	7045767	5080-50-2	C02571	HMDB0000201	252266320	458833024	251887728	274000736	397973952	318530144
1952	arachidonoylcholine	Lipid	Fatty Acid Metabolism (Acyl Choline)	53261	LC/MS Pos Late	1390	390.337	122198216			HMDB0240583	79549	905252	3328741	1809089	578552	211360
1947	dihomo-linolenoyl-choline	Lipid	Fatty Acid Metabolism (Acyl Choline)	53262	LC/MS Pos Late	1424	392.352						280172	1447077	775525	205897
1951	docosahexaenoylcholine	Lipid	Fatty Acid Metabolism (Acyl Choline)	53263	LC/MS Pos Late	1378	414.337						373537	542473	262293	281408	88528
1948	linoleoylcholine*	Lipid	Fatty Acid Metabolism (Acyl Choline)	57463	LC/MS Pos Late	1388	366.337	53481656			HMDB0013213	302443	2888684	10930365	6197071	2293692	635237
1944	oleoylcholine	Lipid	Fatty Acid Metabolism (Acyl Choline)	53260	LC/MS Pos Late	1449	368.352	59040790			HMDB0240596	173346	1284568	5208638	2575839	814448	223088
1950	stearoylcholine*	Lipid	Fatty Acid Metabolism (Acyl Choline)	57464	LC/MS Pos Late	1520	370.368	90111				75739	912478	5041669	2101534	760895
1781	hexanoylglutamine	Lipid	Fatty Acid Metabolism (Acyl Glutamine)	54907	LC/MS Neg	2780	243.135					65926	211366	75454	110032	608215	108567
1823	N-palmitoylglycine	Lipid	Fatty Acid Metabolism (Acyl Glycine)	42092	LC/MS Neg	5580	312.254	151008	2441-41-0		HMDB0013034	121323	214483	206189	184158	167680	143837
1768	butyrylcarnitine (C4)	Lipid	Fatty Acid Metabolism (also BCAA Metabolism)	32412	LC/MS Pos Early	2860	232.154	439829	25576-40-3	C02862	HMDB0002013	7236181	12600270	9778615	8768711	17846032	12099301
1769	butyrylglycine (C4)	Lipid	Fatty Acid Metabolism (also BCAA Metabolism)	31850	LC/MS Neg	1470	144.067	88412	20208-73-5		HMDB0000808	156123	152924	91595.9	168071	245336	216262
1774	methylmalonate (MMA)	Lipid	Fatty Acid Metabolism (also BCAA Metabolism)	1496	LC/MS Polar	3078.4	117.019	487	516-05-2	C02170	HMDB0000202	2641691	3307442	4043147	3113299	3351660	3114104
1771	propionylcarnitine (C3)	Lipid	Fatty Acid Metabolism (also BCAA Metabolism)	32452	LC/MS Pos Early	2590	218.139	107738	17298-37-2	C03017	HMDB0000824	21289892	34808160	39990448	33984472	40581268	32784200
1772	propionylglycine (C3)	Lipid	Fatty Acid Metabolism (also BCAA Metabolism)	31932	LC/MS Neg	960	130.051	98681	21709-90-0		HMDB0000783	303079		309839	308982	333095	295279
1472	malonate	Lipid	Fatty Acid Synthesis	15872	LC/MS Polar	3447	103.004	867	141-82-2;26522-22-85-0	C00383	HMDB0000691	9445676	15915904	16439633	15475062	13687422	11293590
1471	malonylcarnitine	Lipid	Fatty Acid Synthesis	37059	LC/MS Pos Early	2086	248.113	22833583	853728-01-5		HMDB0002095	67204				58382
1750	2-aminoheptanoate	Lipid	Fatty Acid, Amino	43761	LC/MS Pos Early	3160	146.118	227939	1115-90-8		HMDB0094649	606522	842849	440984	664862	1472045	1415781
1755	2-aminooctanoate	Lipid	Fatty Acid, Amino	43343	LC/MS Pos Late	750	160.133	69522	644-90-6		HMDB0000991	336512	447322	253726	269634	313705	393461
1642	(14 or 15)-methylpalmitate (a17:0 or i17:0)	Lipid	Fatty Acid, Branched	38768	LC/MS Neg	5695	269.249	8181;17903417		C16995	HMDB0061859	11359302	20262424	12142313	11154484	10183541	7441724
1648	(16 or 17)-methylstearate (a19:0 or i19:0)	Lipid	Fatty Acid, Branched	38296	LC/MS Neg	5993	297.28	3083779	2724-59-6		HMDB0037397	983897	1760480	1217155	1038512	944836	673327
1652	pristanate	Lipid	Fatty Acid, Branched	38271	LC/MS Neg	5773	297.28	123929	1189-37-3		HMDB0000795
1663	2-hydroxyglutarate	Lipid	Fatty Acid, Dicarboxylate	37253	LC/MS Pos Early	958	131.034	43	40951-21-1	C02630	HMDB0059655	588229	259409	318792	497945
1705	3-carboxy-4-methyl-5-propyl-2-furanpropanoate (CMPF)	Lipid	Fatty Acid, Dicarboxylate	31787	LC/MS Neg	2800	239.093	123979	86879-39-2		HMDB0061112	16398901	16197216	2674789	2101536	33899500	33007672
1664	4-hydroxy-2-oxoglutaric acid	Lipid	Fatty Acid, Dicarboxylate	40062	LC/MS Polar	3073	161.009	599	1187-99-1	C01127	HMDB0002070	3277199	1900608	2257489	4234671	3368925	2925041
1665	adipate	Lipid	Fatty Acid, Dicarboxylate	21134	LC/MS Polar	3000	145.051	196	124-04-9	C06104	HMDB0000448	167560		188955	197410	511662
1679	azelate (C9-DC)	Lipid	Fatty Acid, Dicarboxylate	18362	LC/MS Neg	1276	187.098	2266	123-99-9	C08261	HMDB0000784	547289	830586	575396	445528	570868	527271
1704	docosadioate (C22-DC)	Lipid	Fatty Acid, Dicarboxylate	39837	LC/MS Neg	5291.8	369.301	7641	505-56-6	C14240	HMDB0061714	713127	751475	785365	722275	1021953	665868
1686	dodecanedioate (C12)	Lipid	Fatty Acid, Dicarboxylate	32388	LC/MS Neg	2990	229.144	12736	693-23-2	C02678	HMDB0000623	448646	907343	489006	357108	34798336	854455
1702	eicosanedioate (C20-DC)	Lipid	Fatty Acid, Dicarboxylate	39831	LC/MS Neg	5200.9	341.27	75502	2424-92-2			594635	682131	647952	536748	486761	546233
1659	glutarate (C5-DC)	Lipid	Fatty Acid, Dicarboxylate	396	LC/MS Polar	2900	131.035	743;4418048	110-94-1	C00489	HMDB0000661	3399299	4386820	6017497	2697911	920145	249801
1695	hexadecanedioate (C16)	Lipid	Fatty Acid, Dicarboxylate	35678	LC/MS Neg	4615	285.207	10459	505-54-4	C19615	HMDB0000672	458196	675150	484473	511844	759570	361111
1671	maleate	Lipid	Fatty Acid, Dicarboxylate	20676	LC/MS Polar	2640	115.004	444266	110-16-7	C01384	HMDB0000176	1725243	2050041	2205909	1468252	3459792	1668431
1698	octadecanedioate (C18)	Lipid	Fatty Acid, Dicarboxylate	36754	LC/MS Neg	5043	313.238	70095	871-70-5		HMDB0000782	404761	752259	487382	376852	406414	288682
1681	sebacate (C10-DC)	Lipid	Fatty Acid, Dicarboxylate	32398	LC/MS Neg	1788	201.113	5192	111-20-6	C08277	HMDB0000792	450380	818055	237076	365102	22366420	618304
1676	suberate (C8-DC)	Lipid	Fatty Acid, Dicarboxylate	15730	LC/MS Polar	2577.6	173.082	10457	505-48-6	C08278	HMDB0000893	169853	195204	153831		843019	192110
1691	tetradecanedioate (C14)	Lipid	Fatty Acid, Dicarboxylate	35669	LC/MS Neg	3985	257.176	13185	821-38-5		HMDB0000872	410221	623651	487722	407023	1147124	356230
2030	12,13-DiHOME	Lipid	Fatty Acid, Dihydroxy	38395	LC/MS Neg	5137	313.238	10236635	263399-35-5	C14829	HMDB0004705	1819679	1594886		1232397	1041434	1431011
2031	9,10-DiHOME	Lipid	Fatty Acid, Dihydroxy	38399	LC/MS Neg	5180	313.238	9966640	263399-34-4	C14828	HMDB0004704	2101125	2035987		924601	183841	685859
2014	13-HODE + 9-HODE	Lipid	Fatty Acid, Monohydroxy	37752	LC/MS Neg	5275	295.228	5312830;1424;5282947;5282944;5282945		C14767,C14762	HMDB0004667,HMDB0004670	5211497	5264472	2550595	2451791	2645695	1679144
1962	2-hydroxydecanoate	Lipid	Fatty Acid, Monohydroxy	42489	LC/MS Neg	4840	187.134	21488	5393-81-7		HMDB0094656	5557064	7002809	3519144	4689640	1445598	3034971
1960	2-hydroxyoctanoate	Lipid	Fatty Acid, Monohydroxy	22036	LC/MS Neg	3736.8	159.103	5312860;6995013;94180	617-73-2		HMDB0002264	472374	634753	412077	408091	434370	367111
1968	2-hydroxypalmitate	Lipid	Fatty Acid, Monohydroxy	35675	LC/MS Neg	5511.2	271.228	12575964;92836;11065598	764-67-0		HMDB0031057	12536622	21747808	25907612	17127672	19255108	10510242
1971	2-hydroxystearate	Lipid	Fatty Acid, Monohydroxy	17945	LC/MS Neg	5695	299.259	69417;439885;439887	629-22-1	C03045,C03042	HMDB0062549	4852570	8082330	11732127	8317449	9021870	5707195
1982	3-hydroxydecanoate	Lipid	Fatty Acid, Monohydroxy	22053	LC/MS Neg	4634.7	187.134	26612	5561-87-5		HMDB0002203	833475	1835285	596114	568402	641879	736291
1979	3-hydroxyhexanoate	Lipid	Fatty Acid, Monohydroxy	53230	LC/MS Neg	1725	131.071	151492	10191-24-9		HMDB0061652,HMDB0010718	381902	886150	315943	245527	529311	239737
1985	3-hydroxylaurate	Lipid	Fatty Acid, Monohydroxy	32457	LC/MS Neg	5175	215.165	94216	53941-38-1		HMDB0000387	417278	1727836	408036	266567	235760	357547
1980	3-hydroxyoctanoate	Lipid	Fatty Acid, Monohydroxy	22001	LC/MS Neg	3446	159.103	26613	88930-08-9	C20793	HMDB0001954	828314	1659784	479357	467657	961780	594892
1984	3-hydroxysebacate	Lipid	Fatty Acid, Monohydroxy	31943	LC/MS Neg	1282	217.108	3017884	73141-46-5		HMDB0000350	72276	331798	100997	99527	729903	106822
1995	5-hydroxyhexanoate	Lipid	Fatty Acid, Monohydroxy	31938	LC/MS Neg	1267	131.071	170748	44843-89-2		HMDB0000525,HMDB0000409		122970	109645	109231	270217	130957
1958	alpha-hydroxycaproate	Lipid	Fatty Acid, Monohydroxy	37073	LC/MS Neg	1920	131.071	99824	6064-63-7		HMDB0001624			82675	78808	62694	334387
1157	ADSGEGDFXAEGGGVR*	Peptide	Fibrinogen Cleavage Peptide	57709	LC/MS Neg	2474	766.835	25081464	25422-31-5
1165	DSGEGDFXAEGGGVR*	Peptide	Fibrinogen Cleavage Peptide	31548	LC/MS Neg	2535	731.317	132993922
1166	ADpSGEGDFXAEGGGVR*	Peptide	Fibrinogen Cleavage Peptide	57712	LC/MS Neg	2016	806.818	132993923	886023-52-5
4771	2,3-dihydroxyisovalerate	Xenobiotics	Food Component/Plant	38276	LC/MS Polar	1050	133.051	677	1756-18-9	C04039	HMDB0012141	606025	480033	358672	256022	704054	611379
4776	2,8-quinolinediol sulfate	Xenobiotics	Food Component/Plant	48691	LC/MS Neg	2612	239.997
5248	2-acetamidophenol sulfate	Xenobiotics	Food Component/Plant	48580	LC/MS Neg	2251	230.013	181671	40712-60-5			1587954	527319	1199009	929357	690245	913737
5249	2-aminophenol sulfate	Xenobiotics	Food Component/Plant	43266	LC/MS Neg	1677	188.002	181670			HMDB0061116	7047297	1901554	8463604	3934935	4668438	3735486
4635	2-piperidinone	Xenobiotics	Food Component/Plant	43400	LC/MS Pos Early	1675	100.076	12665	675-20-7		HMDB0011749	113520536	84305776	307085728	329891488	5494960	5.69652e+06
5087	4-allylphenol sulfate	Xenobiotics	Food Component/Plant	37181	LC/MS Neg	3805	213.023	66633409				1591426	10256450	480763	1128585	2807779	2751063
5115	4-vinylguaiacol sulfate	Xenobiotics	Food Component/Plant	48442	LC/MS Neg	3354	229.018	53803570			HMDB0127980			243631	111873	49696	33251
5042	acesulfame	Xenobiotics	Food Component/Plant	48569	LC/MS Neg	1581	161.987	36573	55589-62-3		HMDB0033585
4815	alliin	Xenobiotics	Food Component/Plant	41494	LC/MS Pos Early	1470	178.053	87310	556-27-4	C08265	HMDB0033592
5202	caffeic acid sulfate	Xenobiotics	Food Component/Plant	53254	LC/MS Polar	1307	258.992	21668705			HMDB0041708	475418	303684	512532	328141		173552
4852	cinnamoylglycine	Xenobiotics	Food Component/Plant	38637	LC/MS Neg	3127	204.067	709625	16534-24-0		HMDB0011621	49017		141181	196942	135063	136700
5119	daidzein sulfate (2)	Xenobiotics	Food Component/Plant	48728	LC/MS Neg	3330	333.008	12114465								3260901	2276150
4878	dihydroferulate	Xenobiotics	Food Component/Plant	40481	LC/MS Neg	1928	195.066	14340	1135-23-5		HMDB0062121					71728	38419
4892	ergothioneine	Xenobiotics	Food Component/Plant	37459	LC/MS Pos Early	850	230.096	5351619	58511-63-0	C05570	HMDB0003045	722230	647522	687339	692789	635740	594935
4894	erythritol	Xenobiotics	Food Component/Plant	20699	LC/MS Polar	1491	167.056	222285	149-32-6	C00503	HMDB0002994	2505330	2147723	2063895	1923955	2376589	2156258
5121	eugenol sulfate	Xenobiotics	Food Component/Plant	48715	LC/MS Neg	3782	243.033	180632	95480-60-7		HMDB0135245	53298			127030	412463	455554
4900	ferulic acid 4-sulfate	Xenobiotics	Food Component/Plant	47114	LC/MS Neg	1200	273.007	6305574	86321-29-1		HMDB0029200	342722	242869	804809	486192	174376	139819
4804	gluconate	Xenobiotics	Food Component/Plant	587	LC/MS Polar	2922	195.051	3085666;10690	527-07-1	C00257	HMDB0000625	5866669	4056396	4070800	3942868	3539792	3111531
4932	homostachydrine*	Xenobiotics	Food Component/Plant	33009	LC/MS Pos Early	1750	158.118	441447	1195-94-4	C08283	HMDB0033433	835809	923169	7139968	7010469	1142079	900285
4933	hydroquinone beta-D-glucopyranoside	Xenobiotics	Food Component/Plant	38160	LC/MS Neg	1520	271.082	346	497-76-7	C06186	HMDB29943		213878	155389	115238	33906	127376
4937	indolin-2-one	Xenobiotics	Food Component/Plant	43374	LC/MS Pos Early	2575	134.06	321710	59-48-3	C12312		228722	338941	351352	357719	211554	274604
5130	isoeugenol sulfate	Xenobiotics	Food Component/Plant	48997	LC/MS Neg	3893	243.033	122198202								59439
5089	methyl glucopyranoside (alpha + beta)	Xenobiotics	Food Component/Plant	46144	LC/MS Neg	1070	193.072	445238;3036743;2108			HMDB0029965	1655868	997843	688974	906007	1787418	1172766
4962	methyl indole-3-acetate	Xenobiotics	Food Component/Plant	1584	LC/MS Pos Early	3380	190.086	74706	1912-33-0		HMDB0029738	178426	174181	231228	174027	244915	229765
4966	N-(2-furoyl)glycine	Xenobiotics	Food Component/Plant	31536	LC/MS Neg	1525	168.03	21863	5657-19-2;5657-19-2		HMDB0000439	181994	696421	605521	639848	1237165	1907707
4816	N-acetylalliin	Xenobiotics	Food Component/Plant	45404	LC/MS Pos Early	1348	220.064
4998	phytanate	Xenobiotics	Food Component/Plant	598	LC/MS Neg	5908	311.296	26840	14721-66-5	C01607	HMDB0000801	1299117	3757549	1959778	1468790	2247060	1358664
5004	piperine	Xenobiotics	Food Component/Plant	33935	LC/MS Pos Late	1168	286.144	638024	94-62-2	C03882	HMDB0029377
5116	pyrraline	Xenobiotics	Food Component/Plant	48428	LC/MS Neg	2304	253.119	14274616	74509-14-1	C21013	HMDB0033143	172153	217132	341761	295663	166476	175244
4904	quinate	Xenobiotics	Food Component/Plant	18335	LC/MS Polar	2432.9	191.056	6508	77-95-2	C00296	HMDB0003072	1699119	499884	197126		1100907	1201244
5043	S-allylcysteine	Xenobiotics	Food Component/Plant	43239	LC/MS Pos Early	2690	162.058	98280	21593-77-1		HMDB0034323
5040	saccharin	Xenobiotics	Food Component/Plant	21151	LC/MS Neg	2000	181.992	5143	81-07-2	C12283	HMDB0029723	111620	55310	320753	169138	148327	85979
5054	solanidine	Xenobiotics	Food Component/Plant	39788	LC/MS Pos Late	1010	398.342	65727	80-78-4	C06543	HMDB0003236
5062	stachydrine	Xenobiotics	Food Component/Plant	34384	LC/MS Pos Early	1440	144.102	115244	4136-37-2	C10172	HMDB0004827	6368688	22377764	10802517	5678623	5273282	3653833
4681	sucralose	Xenobiotics	Food Component/Plant	36649	LC/MS Neg	3140	395.007	71485	56038-13-2	C12285	HMDB0031554	394288	364558	1594251	2006902		66311
5072	tartarate	Xenobiotics	Food Component/Plant	15336	LC/MS Neg	615.3	149.009	444305;875	87-69-4;6106-24-7	C00552,C00898,C02107	HMDB0062642,HMDB0000956	379302	2555298	481841	338845	3055917	92420352
5205	tartronate (hydroxymalonate)	Xenobiotics	Food Component/Plant	20693	LC/MS Neg	610	118.999	45	80-69-3	C02287	HMDB0035227	10580813	15470724	16412644	11185889	9599626	6175346
5076	thymol sulfate	Xenobiotics	Food Component/Plant	36095	LC/MS Neg	4410	229.054	12456386	89-83-8	C09908	HMDB0062720	216889	78198	770596	432028	71468
5150	trans-3,4-methyleneheptanoate	Xenobiotics	Food Component/Plant	53026	LC/MS Neg	3807	141.092					584765	718949	294458	314238	96118	122944
5118	umbelliferone sulfate	Xenobiotics	Food Component/Plant	48674	LC/MS Neg	2440	240.981	129659	69526-88-1		HMDB0240565	172393	318049	281539	275192	352966	329593
1346	fructose	Carbohydrate	Fructose, Mannose and Galactose Metabolism	48195	LC/MS Polar	2065	225.062	2723872	57-48-7	C00095	HMDB0000660	3066963	7253921	8629165	33844952	4549439	10697251
1372	galactonate	Carbohydrate	Fructose, Mannose and Galactose Metabolism	27719	LC/MS Polar	3085	195.051	12310779;128869	299-28-5	C15930,C00880	HMDB0000565	474271			576236		397382
1351	mannitol/sorbitol	Carbohydrate	Fructose, Mannose and Galactose Metabolism	46142	LC/MS Polar	2320	181.072	6251;5780		C00392,C00794	HMDB0000247,HMDB0000765	1984749	1730491	5492929	2864485	1881753	2073304
1352	mannose	Carbohydrate	Fructose, Mannose and Galactose Metabolism	48153	LC/MS Polar	2200	225.062	185698;82308;18950;439680	3458-28-4	C00159,C02209,C00936	HMDB0000169	8813463	5893501	7289735	4805345	7026040	6356321
650	gamma-glutamyl-2-aminobutyrate	Peptide	Gamma-glutamyl Amino Acid	37092	LC/MS Pos Early	2380	233.113		16869-42-4			141103	456835	705825	845224	339299	168220
640	gamma-glutamyl-alpha-lysine	Peptide	Gamma-glutamyl Amino Acid	55015	LC/MS Pos Early	2784	276.155	65254				4270515	4.32261e+06	4737295	4.2487e+06	2115724	1.70531e+06
641	gamma-glutamyl-epsilon-lysine	Peptide	Gamma-glutamyl Amino Acid	33934	LC/MS Pos Early	2725	276.155	7015685	17105-15-6		HMDB0003869	510439	325826	754379	426000	309817	155682
632	gamma-glutamylalanine	Peptide	Gamma-glutamyl Amino Acid	37063	LC/MS Pos Early	1986	219.098	440103	5875-41-2	C03738	HMDB0029142	1700569	2115837	2526357	2026883	751395	469480
634	gamma-glutamylglutamate	Peptide	Gamma-glutamyl Amino Acid	36738	LC/MS Pos Early	1775	277.103	92865	1116-22-9	C05282	HMDB0011737	8219121	7795704	6962912	4816312	1210726	788031
635	gamma-glutamylglutamine	Peptide	Gamma-glutamyl Amino Acid	2730	LC/MS Pos Early	1430	276.119	150914	10148-81-9	C05283	HMDB0011738	40538676	49487896	48509696	50308152	26614200	22138156
636	gamma-glutamylglycine	Peptide	Gamma-glutamyl Amino Acid	33949	LC/MS Pos Early	1535	205.082	100099	1948-29-4		HMDB0011667	27507316	28206204	29720284	23474170	5988294	4221319
637	gamma-glutamylhistidine	Peptide	Gamma-glutamyl Amino Acid	18245	LC/MS Pos Early	2740	285.119	7017195	37460-15-4		HMDB0029151	1279499	2114493	2661001	1458013	819864	290763
638	gamma-glutamylisoleucine*	Peptide	Gamma-glutamyl Amino Acid	34457	LC/MS Neg	1600	259.13	22885096			HMDB0011170	695565	805514	624348	502963	190828	74224
639	gamma-glutamylleucine	Peptide	Gamma-glutamyl Amino Acid	18369	LC/MS Pos Early	2991	261.144	151023	2566-39-4		HMDB0011171	7084148	7553409	7360415	5825133	2919936	1310092
642	gamma-glutamylmethionine	Peptide	Gamma-glutamyl Amino Acid	44872	LC/MS Pos Early	2640	279.101	7009567	17663-87-5		HMDB0029155	3388838	3901282	4077670	4530227	2416419	1368808
643	gamma-glutamylphenylalanine	Peptide	Gamma-glutamyl Amino Acid	33422	LC/MS Neg	1825	293.114	111299	7432-24-8		HMDB0000594	491696	575247	472864	415161	315630	251022
644	gamma-glutamylthreonine	Peptide	Gamma-glutamyl Amino Acid	33364	LC/MS Pos Early	1750	249.108	76078708	5652-48-2		HMDB0029159	5206678	5512326	6110399	4750232	3287783	2396095
645	gamma-glutamyltryptophan	Peptide	Gamma-glutamyl Amino Acid	33947	LC/MS Neg	1960	332.125	3989307	66471-20-3		HMDB0029160	45200	47079	59080	55591	46379	49488
646	gamma-glutamyltyrosine	Peptide	Gamma-glutamyl Amino Acid	2734	LC/MS Neg	1240	309.109	94340	7432-23-7		HMDB0011741	420373	325353	360049	343322	384510	258290
647	gamma-glutamylvaline	Peptide	Gamma-glutamyl Amino Acid	43829	LC/MS Pos Early	2700	247.129	7015683	2746-34-1		HMDB0011172	19028340	23359504	21146752	17097404	4421702	1977973
60	2-pyrrolidinone	Amino Acid	Glutamate Metabolism	31675	LC/MS Pos Early	1262	86.06	12025	616-45-5		HMDB0002039	2893457	1558421	1923017	2022826	1000866	1310159
51	4-hydroxyglutamate	Amino Acid	Glutamate Metabolism	40499	LC/MS Pos Early	1141	164.055	439902	2485-33-8	C03079	HMDB0001344	3339611	1195515	1221250	2631379	370742	144832
46	alpha-ketoglutaramate*	Amino Acid	Glutamate Metabolism	62101	LC/MS Polar	1916	144.03	48	18465-19-5	C00940	HMDB0001552	3319952	3669870	3604631	3396715	2910462	2911432
56	beta-citrylglutamate	Amino Acid	Glutamate Metabolism	54923	LC/MS Neg	530	320.062	189741	73590-26-8	C20775		180224	260928	412876	181571	357182	430926
58	carboxyethyl-GABA	Amino Acid	Glutamate Metabolism	40007	LC/MS Pos Early	2085	176.092	2572	4386-03-02		HMDB0002201	339052	256016	230901	287230	294015	302468
63	citramalate	Amino Acid	Glutamate Metabolism	22158	LC/MS Pos Early	1224	166.071	1081	6236-10-08	C00815	HMDB0000426	148129	118243	65636
44	glutamate	Amino Acid	Glutamate Metabolism	57	LC/MS Pos Early	1500	148.06	33032	56-86-0	C00025,C00217	HMDB0000148	624465920	560707136	604427776	420212640	367187616	292974880
54	glutamate, gamma-methyl ester	Amino Acid	Glutamate Metabolism	33487	LC/MS Pos Early	2170	162.076	68662	1499-55-4;1499-55-4		HMDB0061715	325839		416085	437741	535104	399935
45	glutamine	Amino Acid	Glutamate Metabolism	53	LC/MS Pos Early	1291	147.076	5961	56-85-9	C00064	HMDB0000641	1225219328	1333466112	1484557440	1588096384	2039249024	1868620416
55	N-acetyl-aspartyl-glutamate (NAAG)	Amino Acid	Glutamate Metabolism	35665	LC/MS Pos Early	1035	305.098	188803	3106-85-2	C12270	HMDB0001067	289413	299574	335281	351501	421822	370007
47	N-acetylglutamate	Amino Acid	Glutamate Metabolism	15720	LC/MS Pos Early	1050	190.071	70914	5817-08-03	C00624	HMDB0001138	307314	466777	370272	365204	516194	408054
48	N-acetylglutamine	Amino Acid	Glutamate Metabolism	33943	LC/MS Polar	2140	187.072	182230	2490-97-3	C02716	HMDB0006029	69193		89053	63176	100225	123132
62	S-1-pyrroline-5-carboxylate	Amino Acid	Glutamate Metabolism	42370	LC/MS Pos Early	1528	114.055	11966181	2906-39-0	C04322	HMDB0001301			848104	928744	1567814	1474696
580	2-aminobutyrate	Amino Acid	Glutathione Metabolism	42374	LC/MS Pos Early	2059	104.071	80283	1492-24-6	C02356	HMDB0000452	56692344	78278872	72766336	77117120	83086424	60407240
582	2-hydroxybutyrate/2-hydroxyisobutyrate	Amino Acid	Glutathione Metabolism	52281	LC/MS Polar	1258	103.04	4277439;440864		C21297,C05984	HMDB0000729,HMDB00008	78510920	188129056	117534848	130195272	161162576	94502560
579	5-oxoproline	Amino Acid	Glutathione Metabolism	1494	LC/MS Neg	738.5	128.035	439685;7405	98-79-3	C01879,C02237	HMDB0000267	68181824	61321660	76284560	56983708	47077944	41625980
578	cys-gly, oxidized	Amino Acid	Glutathione Metabolism	18368	LC/MS Neg	925	353.06	333293	7729-20-6								194917
573	cysteine-glutathione disulfide	Amino Acid	Glutathione Metabolism	35159	LC/MS Pos Early	2465	427.095	3080690	13081-14-6	R00900	HMDB0000656	280226	229056	554612	247903	934616	6120796
576	cysteinylglycine	Amino Acid	Glutathione Metabolism	35637	LC/MS Pos Early	2132	179.048	439498	19246-18-5	C01419	HMDB0000078	559191	377687	426240	545645	940155	1119112
567	glutathione, oxidized (GSSG)	Amino Acid	Glutathione Metabolism	27727	LC/MS Pos Early	2667	613.159	65359	103239-24-3	D00031,C00127	HMDB0003337						96372
2841	glycerol	Lipid	Glycerolipid Metabolism	15122	LC/MS Neg	758	91.0401	753	56-81-5	C00116	HMDB0000131	5835036	9983197	2511985	4254173	2284782	3244741
2842	glycerol 3-phosphate	Lipid	Glycerolipid Metabolism	43847	LC/MS Pos Early	580	173.021	754	29849-82-9	C0093	HMDB0000126	109257	92781		274302	369350	264510
2847	glycerophosphoglycerol	Lipid	Glycerolipid Metabolism	48857	LC/MS Polar	2430	245.043	54575349		C03274	HMDB0240316	92139	94520	186710	189847	111793	109620
16	2-methylserine	Amino Acid	Glycine, Serine and Threonine Metabolism	53229	LC/MS Pos Early	1652	120.066	94309		C02115		17276926	16389988	12959428		37276408	30549988
7	betaine	Amino Acid	Glycine, Serine and Threonine Metabolism	3141	LC/MS Pos Early	1064	118.086	247	107-43-7	C00719	HMDB0000043	987965120	958952832	826695808	991120320	739317888	948468032
6	dimethylglycine	Amino Acid	Glycine, Serine and Threonine Metabolism	5086	LC/MS Pos Early	1104	104.071	673	1118-68-9	C03626	HMDB0000092	21856288	39800232	27786228	31209956	34565160	29173744
1	glycine	Amino Acid	Glycine, Serine and Threonine Metabolism	58	LC/MS Pos Early	1375	76.0393	750	56-40-6	C00037	HMDB0000123	113832216	109240624	122130944	107483432	123708536	130717392
2	N-acetylglycine	Amino Acid	Glycine, Serine and Threonine Metabolism	27710	LC/MS Pos Early	826	118.05	10972	543-24-8		HMDB0000532	1633835	2613513	2808629	2228444	2591635	2147555
11	N-acetylserine	Amino Acid	Glycine, Serine and Threonine Metabolism	37076	LC/MS Polar	2000	146.046	65249	97-14-3		HMDB0002931	7113061	8051235	6910153	6038138	7034355	6359374
18	N-acetylthreonine	Amino Acid	Glycine, Serine and Threonine Metabolism	33939	LC/MS Neg	821.6	160.061	152204	17093-74-2		HMDB0062557	4513009	7103027	7023570	6156008	6642736	6907320
5	sarcosine	Amino Acid	Glycine, Serine and Threonine Metabolism	1516	LC/MS Pos Early	1280	90.055	1088	107-97-1	C00213	HMDB0000271	32597208	26513960	25552456	62543980	102613936	21528604
10	serine	Amino Acid	Glycine, Serine and Threonine Metabolism	1648	LC/MS Pos Early	1239	106.05	5951	56-45-1	C00065	HMDB0000187	122334616	126099256	150197440	128534824	160628304	169600288
17	threonine	Amino Acid	Glycine, Serine and Threonine Metabolism	1284	LC/MS Pos Early	1514	120.066	6288	72-19-5	C00188	HMDB0000167	294060128	301492704	416139840	366665344	464442656	382556160
1299	maltose	Carbohydrate	Glycogen Metabolism	15586	LC/MS Polar	3329.4	387.114	10991489	6363-53-7	C00208	HMDB0000163	376051	630868	856270	163587	280248	423321
1296	maltotriose	Carbohydrate	Glycogen Metabolism	44688	LC/MS Neg	812	503.162	439586	1109-28-0	C01835	HMDB0001262	457837	704231	1497896	131797	300530	750932
1220	1,5-anhydroglucitol (1,5-AG)	Carbohydrate	Glycolysis, Gluconeogenesis, and Pyruvate Metabolism	20675	LC/MS Neg	802	163.061	64960	154-58-5	C07326	HMDB0002712	169820320	158311408	178239568	184203424	135644848	130593664
1237	3-phosphoglycerate	Carbohydrate	Glycolysis, Gluconeogenesis, and Pyruvate Metabolism	1414	LC/MS Pos Early	590	187	724	80731-10-8	C00597	HMDB0000807	61241		77306		91300	930350
1223	glucose	Carbohydrate	Glycolysis, Gluconeogenesis, and Pyruvate Metabolism	48152	LC/MS Polar	2342	225.062	5793	50-99-7	C00031	HMDB0000122	921359360	894731200	860631040	702977024	806813696	838419008
1243	glycerate	Carbohydrate	Glycolysis, Gluconeogenesis, and Pyruvate Metabolism	1572	LC/MS Polar	2070.4	105.019	752;439194	600-19-1	C00258	HMDB0006372,HMDB0000139	100416536	102514944	122825184	122659328	121356136	72576824
1240	lactate	Carbohydrate	Glycolysis, Gluconeogenesis, and Pyruvate Metabolism	527	LC/MS Neg	681.6	89.0244	612	79-33-4	C00186	HMDB0000190	381890848	487936960	258055936	248136720	194192368	270315808
1239	pyruvate	Carbohydrate	Glycolysis, Gluconeogenesis, and Pyruvate Metabolism	48990	LC/MS Polar	1083	87.0088	1060	127-17-3	C00022	HMDB0000243	31825750	56478396	30025720	27789992	28690724	44030496
562	1-methylguanidine	Amino Acid	Guanidino and Acetamido Metabolism	48114	LC/MS Pos Early	2149	74.0713	10111	22661-87-6	C02294	HMDB0001522
563	4-guanidinobutanoate	Amino Acid	Guanidino and Acetamido Metabolism	15681	LC/MS Pos Early	2320	146.092	500	463-003;463-00-3	C01035	HMDB0003464	320624	274631	1177220	835848	258461
4408	bilirubin (E,E)*	Cofactors and Vitamins	Hemoglobin and Porphyrin Metabolism	32586	LC/MS Pos Late	1045	585.271	129320511				774813	1818361	1365630	1434777	781492	1403439
4409	bilirubin (E,Z or Z,E)*	Cofactors and Vitamins	Hemoglobin and Porphyrin Metabolism	47886	LC/MS Pos Late	1265	585.271	5799469		C00486	HMDB0000488	76501	339766	428290	525655	452251	792752
4407	bilirubin	Cofactors and Vitamins	Hemoglobin and Porphyrin Metabolism	43807	LC/MS Pos Late	1840	585.271	5280352	635-65-4	C00486	HMDB0000054	17252508	29507448	29605288	38905208	32859826	43507376
4410	biliverdin	Cofactors and Vitamins	Hemoglobin and Porphyrin Metabolism	2137	LC/MS Pos Late	1016	583.255	5280353	55482-27-4;55482-27-4	C00500	HMDB0001008	3649565	3304721	2399017	3211061	2839544	1915930
4406	heme	Cofactors and Vitamins	Hemoglobin and Porphyrin Metabolism	41754	LC/MS Neg	5325	632.173	26945	14875-96-8	C00032	HMDB0003178	326493	173706	146661		398727	120207
4411	I-urobilinogen	Cofactors and Vitamins	Hemoglobin and Porphyrin Metabolism	32426	LC/MS Neg	4190	591.319	9548718	14684-37-8	C05789	HMDB0004157					27833
4413	L-urobilin	Cofactors and Vitamins	Hemoglobin and Porphyrin Metabolism	40173	LC/MS Pos Late	901	595.349	5280818	34217-90-8	C05793	HMDB0004159
3078	glycosyl ceramide (d18:1/20:0, d16:1/22:0)*	Lipid	Hexosylceramides (HCER)	57595	LC/MS Pos Late	3414	756.635					2838524	3293406	4581232	4200612	4499138	3910571
3082	glycosyl ceramide (d18:2/24:1, d18:1/24:2)*	Lipid	Hexosylceramides (HCER)	57453	LC/MS Pos Late	3380	808.666					2999493	4356797	3398327	4020937	3412189	4246930
3068	glycosyl-N-behenoyl-sphingadienine (d18:2/22:0)*	Lipid	Hexosylceramides (HCER)	57421	LC/MS Pos Late	3420	782.65					2120688	1879206	2405328	2162068	2410585	2113896
3057	glycosyl-N-palmitoyl-sphingosine (d18:1/16:0)	Lipid	Hexosylceramides (HCER)	53013	LC/MS Pos Late	2623	700.572					18829864	18625716	18314432	17643020	17555848	17965632
3058	glycosyl-N-stearoyl-sphingosine (d18:1/18:0)	Lipid	Hexosylceramides (HCER)	52234	LC/MS Pos Late	3053	728.604					1583621	2118758	3176720	2490768	3028154	2458557
91	1-methyl-4-imidazoleacetate	Amino Acid	Histidine Metabolism	32350	LC/MS Pos Early	2064	141.066	75810	2625-49-2	C05828	HMDB0002820	1983347	2422712	2059059	2095144	2572552	1913321
71	1-methylhistidine	Amino Acid	Histidine Metabolism	30460	LC/MS Pos Early	2755	170.092	92105	332-80-9	C01152	HMDB0000001	4043252	5312409	7987502	4626465	8614942	4600152
72	3-methylhistidine	Amino Acid	Histidine Metabolism	15677	LC/MS Neg	906.3	168.078	64969	368-16-1	C01152	HMDB0000479	803169	375914	2348966	1856298	6276271	857312
97	4-imidazoleacetate	Amino Acid	Histidine Metabolism	32349	LC/MS Pos Early	2055	127.05	96215	645-65-8	C02835	HMDB0002024	584322	703440	592549	423290	511210	495580
87	anserine	Amino Acid	Histidine Metabolism	15747	LC/MS Neg	1124.8	239.115	112072	10030-52-1	C01262	HMDB0000194	199473	49692	341063	319543	5562882	63544
84	carnosine	Amino Acid	Histidine Metabolism	1768	LC/MS Pos Early	2942	227.114	439224	305-84-0	C00386	HMDB0000033	6892049	5709256	4346442	4434787	15086044	3115392
81	formiminoglutamate	Amino Acid	Histidine Metabolism	43493	LC/MS Pos Early	1880	175.071	439233	816-90-0	C00439	HMDB0000854	471968	880166	778113	832831	1532755	662029
70	histidine	Amino Acid	Histidine Metabolism	59	LC/MS Neg	755.9	154.062	6274	5934-29-2	C00135	HMDB0000177	48217160	49268872	62549400	71986208	61107864	73361664
77	hydantoin-5-propionate	Amino Acid	Histidine Metabolism	40473	LC/MS Polar	2080	171.041	782	5624-26-0	C05565	HMDB0001212		131632	79019	61987	224885	84332
83	imidazole lactate	Amino Acid	Histidine Metabolism	15716	LC/MS Pos Early	2040	157.061	793	14403-45-3	C05568	HMDB0002320	1183700	1212694	1075944	1176816	1112917	977489
80	imidazole propionate	Amino Acid	Histidine Metabolism	40730	LC/MS Pos Early	2263	141.066	70630	1074-59-5		HMDB0002271	358900	357253	1638201	615403	405101	423671
76	N-acetyl-1-methylhistidine*	Amino Acid	Histidine Metabolism	43255	LC/MS Pos Early	2100	212.103	53859791						51575
75	N-acetyl-3-methylhistidine*	Amino Acid	Histidine Metabolism	43256	LC/MS Pos Early	2056	212.103	193270	37841-04-6							131306	50880
86	N-acetylcarnosine	Amino Acid	Histidine Metabolism	43488	LC/MS Neg	1235	267.11	9903482	56353-15-2		HMDB0012881	331872	295297	404118	302327	380120	229158
73	N-acetylhistidine	Amino Acid	Histidine Metabolism	33946	LC/MS Polar	2088	196.073	75619	39145-52-3	C02997	HMDB0032055	252138	346136	245668	275490	180759	314363
78	trans-urocanate	Amino Acid	Histidine Metabolism	607	LC/MS Pos Early	2285	139.05	736715	104-98-3	C00785	HMDB0000301	3433851	4965280	2208665	3193548	1653362	2635416
2201	myo-inositol	Lipid	Inositol Metabolism	1124	LC/MS Polar	3506.3	225.062	892	87-89-8	C00137	HMDB0000211	10867015	15361832	11845046	10719707	11662334	11481747
1938	3-hydroxybutyrate (BHBA)	Lipid	Ketone Bodies	542	LC/MS Polar	1480	103.04	441;94318;92135	625-72-9	C03197,C01089	HMDB0000011,HMDB0000357,HMDB0000442	32010844	197167488	27685320	28827702	148246400	20042232
3091	lactosyl-N-nervonoyl-sphingosine (d18:1/24:1)*	Lipid	Lactosylceramides (LCER)	57370	LC/MS Pos Late	3778	972.735					5879942	6724860	7187964	5441247	6268264	6916262
3087	lactosyl-N-palmitoyl-sphingosine (d18:1/16:0)	Lipid	Lactosylceramides (LCER)	53010	LC/MS Pos Late	2527	862.625	53477895	4201-62-1			22904534	26253272	17819112	19154476	19118252	20678150
420	1-carboxyethylvaline	Amino Acid	Leucine, Isoleucine and Valine Metabolism	62562	LC/MS Neg	2008	188.093					363734	581654	639728	572828	815090	736511
429	2,3-dihydroxy-2-methylbutyrate	Amino Acid	Leucine, Isoleucine and Valine Metabolism	57547	LC/MS Neg	787	133.051	301941	14868-24-7		HMDB0029576	598331	553292	474811	486087	767780	762321
395	2-hydroxy-3-methylvalerate	Amino Acid	Leucine, Isoleucine and Valine Metabolism	36746	LC/MS Neg	1800	131.071	164623	488-15-3		HMDB0000317	245068	359847	384061	302126	279001	242182
397	2-methylbutyrylcarnitine (C5)	Amino Acid	Leucine, Isoleucine and Valine Metabolism	45095	LC/MS Pos Early	3050	246.17	6426901	31023-25-3		HMDB0000378	601927	1290962	1131034	1101912	1122165	1175558
399	2-methylbutyrylglycine (C5)	Amino Acid	Leucine, Isoleucine and Valine Metabolism	31928	LC/MS Pos Early	2000	160.097	193872	52320-67-9		HMDB0000339
405	3-hydroxy-2-ethylpropionate	Amino Acid	Leucine, Isoleucine and Valine Metabolism	32397	LC/MS Neg	975	117.056	188979	4374-62-3		HMDB0000396	733184	1433327	1007343	1009910	1093592	1101207
428	3-hydroxyisobutyrate	Amino Acid	Leucine, Isoleucine and Valine Metabolism	1549	LC/MS Polar	1619	103.04	11966314	2068-83-9	C01188,C06001	HMDB0000023,HMDB0000336	13112441	48433168	20940984	23810472	28639476	18675304
423	3-methyl-2-oxobutyrate	Amino Acid	Leucine, Isoleucine and Valine Metabolism	44526	LC/MS Neg	1465	115.04	49	3715-29-5	C00141	HMDB0000019	10037486	14735169	9998750	11054641	12265319	9792600
394	3-methyl-2-oxovalerate	Amino Acid	Leucine, Isoleucine and Valine Metabolism	15676	LC/MS Neg	2064.2	129.056	440877;439286	1460-34-0;51829-07-3	C00671,C06008,C03465	HMDB0000491	35393232	47085980	36359280	37045372	46087836	32933548
361	3-methylcrotonylglycine	Amino Acid	Leucine, Isoleucine and Valine Metabolism	31940	LC/MS Pos Early	1980	158.081	169485	33008-07-0	C20828	HMDB0000459			195923			425270
367	3-methylglutaconate	Amino Acid	Leucine, Isoleucine and Valine Metabolism	38667	LC/MS Polar	2700	143.035	1551553	5746-90-7		HMDB0000522	1033004	969305	1385295	930877	790111	1050380
375	3-methylglutarylcarnitine (2)	Amino Acid	Leucine, Isoleucine and Valine Metabolism	46548	LC/MS Pos Early	2687	290.16	128145			HMDB0000552	322686	384056	573254	370834	552455	491511
343	4-methyl-2-oxopentanoate	Amino Acid	Leucine, Isoleucine and Valine Metabolism	22116	LC/MS Neg	2170	129.056	70	816-66-0	C00233	HMDB0000695	56474496	71563224	56067640	53947592	61423244	47781284
386	allo-isoleucine	Amino Acid	Leucine, Isoleucine and Valine Metabolism	46552	LC/MS Pos Early	2775	132.102	99288			HMDB0000557
347	alpha-hydroxyisocaproate	Amino Acid	Leucine, Isoleucine and Valine Metabolism	22132	LC/MS Neg	1840	131.071	92779;83697;439960	10303-64-7	C03264	HMDB0000665,HMDB0000624,HMDB00746	257914	370302	335936	297015	197874	214213
424	alpha-hydroxyisovalerate	Amino Acid	Leucine, Isoleucine and Valine Metabolism	33937	LC/MS Neg	1126	117.056	99823	600-37-3		HMDB0000407	3623907	4440003	3878940	3687581	3385599	2954161
363	beta-hydroxyisovalerate	Amino Acid	Leucine, Isoleucine and Valine Metabolism	12129	LC/MS Neg	1027	117.056	69362	625-08-1		HMDB0000754	1531833	2595398	1890466	1908136	2281282	1765088
364	beta-hydroxyisovaleroylcarnitine	Amino Acid	Leucine, Isoleucine and Valine Metabolism	35433	LC/MS Pos Early	2584	262.165		99159-87-2			1876720	1875228	2787042	2243805	1846341	2655901
407	ethylmalonate	Amino Acid	Leucine, Isoleucine and Valine Metabolism	15765	LC/MS Polar	2785	131.035	11756	601-75-2		HMDB0000622	16026890	32544652	24969860	18179472	22608840	17298580
426	isobutyrylcarnitine (C4)	Amino Acid	Leucine, Isoleucine and Valine Metabolism	33441	LC/MS Pos Early	2810	232.154	168379	25518-49-4		HMDB0000736	9538206	20037796	19167654	11747994	9721160	18327574
427	isobutyrylglycine (C4)	Amino Acid	Leucine, Isoleucine and Valine Metabolism	35437	LC/MS Neg	1420	144.067	10855600	15926-18-8		HMDB0000730	271825	331848	425546	303940	289978	430023
385	isoleucine	Amino Acid	Leucine, Isoleucine and Valine Metabolism	1125	LC/MS Pos Early	2800	132.102	6306	73-32-5	C16424,C00407,C06418	HMDB0000172	883322432	994114880	1006982080	943236736	1278988416	923802304
351	isovalerate (C5)	Amino Acid	Leucine, Isoleucine and Valine Metabolism	44656	LC/MS Neg	1564	101.061	10430	503-74-2	C08262	HMDB0000718	1622485	1534638	1591776	1327273	1424122	1246301
354	isovalerylcarnitine (C5)	Amino Acid	Leucine, Isoleucine and Valine Metabolism	34407	LC/MS Pos Early	3085	246.17	169235	31023-24-2	C20826	HMDB0000688	2401172	4063696	4398907	3938420	6182615	3703833
353	isovalerylglycine	Amino Acid	Leucine, Isoleucine and Valine Metabolism	35107	LC/MS Neg	1950	158.082	546304	16284-60-9		HMDB00678	194580	270179	307721	198162	229599	2413458
332	leucine	Amino Acid	Leucine, Isoleucine and Valine Metabolism	60	LC/MS Pos Early	2864	132.102	6106	61-90-5	C00123	HMDB0000687	1039613312	1129840128	1196532352	1120393856	1480323328	1087796992
410	methylsuccinate	Amino Acid	Leucine, Isoleucine and Valine Metabolism	15745	LC/MS Polar	2800	131.035	10349	498-21-5		HMDB0001844	652463	1500131	3340939	634140	1619666	658743
336	N-acetylleucine	Amino Acid	Leucine, Isoleucine and Valine Metabolism	1587	LC/MS Neg	2400	172.098	70912	1188-21-2	C02710	HMDB0011756	133390	173975	121336	73247	140212	129730
417	N-acetylvaline	Amino Acid	Leucine, Isoleucine and Valine Metabolism	1591	LC/MS Neg	1704	158.082	66789	96-81-1		HMDB0011757	317292	298770	285725	261094	295366	319510
400	tiglyl carnitine (C5)	Amino Acid	Leucine, Isoleucine and Valine Metabolism	35428	LC/MS Pos Early	2962	244.154	22833596	64191-86-2		HMDB0002366	414463	780788	995147	737017	730921	474561
416	valine	Amino Acid	Leucine, Isoleucine and Valine Metabolism	1649	LC/MS Neg	909.4	116.072	6287	72-18-4	C00183	HMDB0000883	62210520	75710600	78396200	77962512	87730200	67043976
1531	10-heptadecenoate (17:1n7)	Lipid	Long Chain Monounsaturated Fatty Acid	33971	LC/MS Neg	5555	267.233	5312435	29743-97-3		HMDB0060038	15210310	34284868	7946022	8590781	7291113	6608415
1540	10-nonadecenoate (19:1n9)	Lipid	Long Chain Monounsaturated Fatty Acid	33972	LC/MS Neg	5780	295.264	5312513	73033-09-7		HMDB0013622	6259808	16476449	4551616	4104452	3202905	2430319
1543	eicosenoate (20:1n9 or 1n11)	Lipid	Long Chain Monounsaturated Fatty Acid	33587	LC/MS Neg	5950	309.28	5282769;5282768;94159		C16526	HMDB0002231,HMDB0062436	36260928	97097616	17999984	13274029	11619638	8155240
1547	erucate (22:1n9)	Lipid	Long Chain Monounsaturated Fatty Acid	1552	LC/MS Neg	6355.6	337.311	8216;5281116	112-86-7	C08316	HMDB0002068	2277611	4699540	2124426	1477345	1581890	1123393
1526	myristoleate (14:1n5)	Lipid	Long Chain Monounsaturated Fatty Acid	32418	LC/MS Neg	5346.9	225.186	5281119	544-64-9	C08322	HMDB0002000	26040158	61135736	5963789	5682945	3602218	4515435
1549	nervonate (24:1n9)*	Lipid	Long Chain Monounsaturated Fatty Acid	52674	LC/MS Neg	6804	365.342	5281120	506-37-6	C08323	HMDB0002368		7248846		3836485	104219	2976330
1533	oleate/vaccenate (18:1)	Lipid	Long Chain Monounsaturated Fatty Acid	52285	LC/MS Neg	5655	281.249	637517;445639;5281127;5282761		C01712,C08367,C00712,C21944	HMDB0000207,HMDB0000573,HMDB0003231,HMDB0240219	3282436096	7236771840	1531235712	1352512896	1147593344	834182080
1529	palmitoleate (16:1n7)	Lipid	Long Chain Monounsaturated Fatty Acid	33447	LC/MS Neg	5475	253.217	445638	373-49-9	C08362	HMDB0003229	210202784	526335040	70968144	61926060	51345212	40891376
1575	adrenate (22:4n6)	Lipid	Long Chain Polyunsaturated Fatty Acid (n3 and n6)	32980	LC/MS Neg	5678	331.264	5497181;5282844	2091-25-0	C16527	HMDB0002226	4723238	17987744	7092103	4166248	5527235
1573	arachidonate (20:4n6)	Lipid	Long Chain Polyunsaturated Fatty Acid (n3 and n6)	1110	LC/MS Neg	5535	303.233	444899	506-32-1	C00219	HMDB0001043	59945176	114114448	117740488	51592212	38243504	20620048
1570	dihomolinoleate (20:2n6)	Lipid	Long Chain Polyunsaturated Fatty Acid (n3 and n6)	17805	LC/MS Neg	5730	307.264	6439848	2091-39-6	C16525	HMDB0005060	22633096	54974656	16363081	11094977	10444512	6905719
1572	dihomolinolenate (20:3n3 or 3n6)	Lipid	Long Chain Polyunsaturated Fatty Acid (n3 and n6)	35718	LC/MS Neg	5596	305.249	5280581	17046-59-2	C03242	HMDB0002925	20558346	43522568	40601372	19676400	16184845	8410412
1577	docosadienoate (22:2n6)	Lipid	Long Chain Polyunsaturated Fatty Acid (n3 and n6)	32415	LC/MS Neg	6034	335.296	5282807	7370-49-2	C16533	HMDB0061714	937751	1840073	778642	549487	651640	458815
1563	docosahexaenoate (DHA; 22:6n3)	Lipid	Long Chain Polyunsaturated Fatty Acid (n3 and n6)	44675	LC/MS Neg	5525	327.233	445580	6217-54-5	C06429	HMDB0002183	29435456	60058684	24737812	12559972	30004518	16725050
1562	docosapentaenoate (DPA; 22:5n3)	Lipid	Long Chain Polyunsaturated Fatty Acid (n3 and n6)	32504	LC/MS Neg	5571	329.249	6441454	2234-74-4	C16513	HMDB0001976,HMDB0006528	5497714	12335317	7323208	4013945	3119350	1895026
1576	docosapentaenoate (n6 DPA; 22:5n6)	Lipid	Long Chain Polyunsaturated Fatty Acid (n3 and n6)	37478	LC/MS Neg	5624.5	329.249	6441454	25182-74-5	C16513	HMDB0001976	3871766	7366171	5987057	3145678	3391676	2156697
1560	eicosapentaenoate (EPA; 20:5n3)	Lipid	Long Chain Polyunsaturated Fatty Acid (n3 and n6)	18467	LC/MS Neg	5450	301.217	446284	10-2005-9;10417-94-4	C06428	HMDB0001999	5351638	8225788	5936032	3398031	4305625	3225074
1566	hexadecadienoate (16:2n6)	Lipid	Long Chain Polyunsaturated Fatty Acid (n3 and n6)	57652	LC/MS Neg	5398	251.202	13932172	28290-73-5		HMDB0000477	6182440	11460924	1456124	1548538	1265613	1380819
1567	linoleate (18:2n6)	Lipid	Long Chain Polyunsaturated Fatty Acid (n3 and n6)	1105	LC/MS Neg	5535	279.233	5280450	60-33-3	C01595	HMDB0000673,HMDB0006270	1740209536	3922284800	836924992	737856512	661010368	465683392
1569	linolenate (18:3n3 or 3n6)	Lipid	Long Chain Polyunsaturated Fatty Acid (n3 and n6)	34035	LC/MS Neg	5450	277.217	5280933;5280934		C06426,C06427	HMDB0001388,HMDB0003073	226682240	528136960	64592392	66183532	76320600	51319028
1557	stearidonate (18:4n3)	Lipid	Long Chain Polyunsaturated Fatty Acid (n3 and n6)	33969	LC/MS Neg	5395	275.202	5312508	111174-40-4	C16300	HMDB0006547	2291511	3333621	750075	689378	1311366	628823
1517	arachidate (20:0)	Lipid	Long Chain Saturated Fatty Acid	1118	LC/MS Neg	6240	311.296	10467	506-30-9	C06425	HMDB0002212	22980080	38134856	27872836	23903078	25565884	20186784
1519	behenate (22:0)*	Lipid	Long Chain Saturated Fatty Acid	12125	LC/MS Neg	6745	339.327	8215	112-85-6	C08281	HMDB0000944	6837384	17401736	7702511	11936677	8857270	9614311
1512	margarate (17:0)	Lipid	Long Chain Saturated Fatty Acid	1121	LC/MS Neg	5731	269.249	10465	506-12-7		HMDB0002259	34662300	75285232	37360184	30244596	27519868	23631392
1507	myristate (14:0)	Lipid	Long Chain Saturated Fatty Acid	1365	LC/MS Neg	5440	227.202	11005	544-63-8	C06424	HMDB0000806	149705552	347849056	98184520	84868264	73942544	58032464
1516	nonadecanoate (19:0)	Lipid	Long Chain Saturated Fatty Acid	1356	LC/MS Neg	6068	297.28	12591	646-30-0	C16535	HMDB0000772	4316531	6508974	4379484	3776698	3892888	3075681
1510	palmitate (16:0)	Lipid	Long Chain Saturated Fatty Acid	1336	LC/MS Neg	5618	255.233	985	57-10-3	C00249	HMDB0000220	2068893184	3755220480	2015152128	1867786752	1782504192	1402023296
1514	stearate (18:0)	Lipid	Long Chain Saturated Fatty Acid	1358	LC/MS Neg	5872	283.264	5281	57-11-4	C01530	HMDB0000827	1350587264	2130607744	1724894464	1416329600	1405766528	1154473472
123	2-aminoadipate	Amino Acid	Lysine Metabolism	6146	LC/MS Polar	3500	160.061	92136	542-32-5;1118-90-7	C00956	HMDB0000510	253308	415295	550787	468371	569259	263131
120	5-(galactosylhydroxy)-L-lysine	Amino Acid	Lysine Metabolism	43582	LC/MS Pos Early	2755	325.161	66995551	32448-36-5			395469	501867	413606	384924	462709	405426
119	5-hydroxylysine	Amino Acid	Lysine Metabolism	15685	LC/MS Pos Early	2790	163.108	3032849	13204-98-3	C16741	HMDB0000450	1843508	1634554	1769908	1678729	2639599	1676470
133	6-oxopiperidine-2-carboxylate	Amino Acid	Lysine Metabolism	43231	LC/MS Neg	965	142.051	3014237	34622-39-4		HMDB0061705	902669	1383174	1494058	1280779	1751172	952556
121	fructosyllysine	Amino Acid	Lysine Metabolism	46227	LC/MS Pos Early	2784	309.166	9839580	21291-40-7		HMDB0034879	6659129	7483241	9474302	6072220	6588024	5907490
127	glutarylcarnitine (C5-DC)	Amino Acid	Lysine Metabolism	44664	LC/MS Pos Early	2393	276.144	71317118	102636-82-8		HMDB0013130	869446	1530842	1897804	1986666	1882053	1108376
117	hydroxy-N6,N6,N6-trimethyllysine*	Amino Acid	Lysine Metabolism	62959	LC/MS Pos Early	2759	205.155					514547	608866	640335	457898	623220	682402
105	lysine	Amino Acid	Lysine Metabolism	1301	LC/MS Pos Early	2850	147.113	5962	56-87-1	C00047,C00739	HMDB0003405	503184224	453224224	571616896	572915968	562320640	699791616
138	N,N,N-trimethyl-5-aminovalerate	Amino Acid	Lysine Metabolism	57687	LC/MS Pos Early	2186	160.133	14274897				11694200	14481206	10489401	9845647	10564592	9746944
135	N-acetyl-cadaverine	Amino Acid	Lysine Metabolism	43530	LC/MS Pos Early	2385	145.133	10374713	32343-73-0		HMDB0002284			194130
116	N6,N6,N6-trimethyllysine	Amino Acid	Lysine Metabolism	1498	LC/MS Pos Early	2825	189.16	440120	23284-33-5	C03793	HMDB0001325	10035119	11167336	11391710	9816223	15204917	10673181
107	N6-acetyllysine	Amino Acid	Lysine Metabolism	36752	LC/MS Neg	1059	187.109	92832	692-04-6	C02727	HMDB0000206	466872	526984	585050	448687	698035	538171
131	pipecolate	Amino Acid	Lysine Metabolism	1444	LC/MS Pos Early	2200	130.086		4043-87-2			40637344	22368444	38667896	48410880	96729008	38089448
2641	1-adrenoyl-GPC (22:4)*	Lipid	Lysophospholipid	52698	LC/MS Pos Late	1512	572.371	52924039			HMDB0010401	885281	1306754	2456518	1960447	905409	826774
2592	1-arachidonoyl-GPA (20:4)	Lipid	Lysophospholipid	46325	LC/MS Neg	5499	457.236	42607498	799268-65-8		HMDB0062312		148787
2635	1-arachidonoyl-GPC* (20:4)*	Lipid	Lysophospholipid	33228	LC/MS Pos Late	1460	544.34	24779476		C05208	HMDB0010395	42364408	52846084	68692680	56079412	44251576	46136352
2686	1-arachidonoyl-GPE (20:4n6)*	Lipid	Lysophospholipid	35186	LC/MS Pos Late	1470	502.293	42607465			HMDB0011517	8701530	12253005	12535192	10987052	10364456	10619027
2731	1-arachidonoyl-GPI* (20:4)*	Lipid	Lysophospholipid	34214	LC/MS Neg	5482	619.289	121596217			HMDB0061690	2220553	4694644	7745968	3834312	3455209	1739751
2624	1-arachidoyl-GPC (20:0)	Lipid	Lysophospholipid	45456	LC/MS Pos Late	1706	552.402	24779473	108341-80-6	C04230	HMDB0010390	857312	884787	1636552	872260
2638	1-behenoyl-GPC (22:0)	Lipid	Lysophospholipid	39792	LC/MS Pos Late	1785	580.434	24779479	125146-65-8		HMDB0010398	1096286	425577	1303646	494231	1546819	774259
2630	1-eicosatrienoyl-GPC* (20:3)*	Lipid	Lysophospholipid	33821	LC/MS Pos Late	1520	546.355	52924055			HMDB0010394	14229694	20236546	38375940	28580148	23541242	22569940
2683	1-dihomo-linolenoyl-GPE (20:3n3 or 6)*	Lipid	Lysophospholipid	44630	LC/MS Neg	6032	502.294					713844	1293210	2214541	1248881	1321481	585410
2629	1-eicosadienoyl-GPC* (20:2)*	Lipid	Lysophospholipid	33871	LC/MS Pos Late	1577	548.371				HMDB0010392	2502965	3559719	4948672	3757418	3331969	3040544
2645	1-docosahexaenoyl-GPC* (22:6)*	Lipid	Lysophospholipid	33822	LC/MS Pos Late	1455	568.34	10415542			HMDB0010404	11085410	15907321	9529199	7390201	15641508	16210767
2697	1-docosahexaenoyl-GPE (22:6)*	Lipid	Lysophospholipid	44633	LC/MS Pos Late	1450	526.293	85333229			HMDB11496	5040545	7178675	3475037	3220760	7973492	7361514
2642	1-docosapentaenoyl-GPC* (22:5n3)*	Lipid	Lysophospholipid	37231	LC/MS Pos Late	1470	570.355					2357783	3157322	5246122	4261115	2645137	2435812
2644	1-docosapentaenoyl-GPC* (22:5n6)*	Lipid	Lysophospholipid	45675	LC/MS Pos Late	1492	570.355					679541	1036511	1623727	1312178	872982	865529
2636	1-eicosapentaenoyl-GPC (20:5)*	Lipid	Lysophospholipid	44563	LC/MS Pos Late	1395	542.324					2301519	1971455	3656019	2674112	4148007	4673714
2627	1-eicosenoyl-GPC (20:1)*	Lipid	Lysophospholipid	44560	LC/MS Pos Late	1630	550.387	52924051			HMDB0010391	2947419	3760990	3794612	2126476	2285473	2648270
2649	1-lignoceroyl-GPC (24:0)	Lipid	Lysophospholipid	49617	LC/MS Pos Late	1907	608.465	24779481	325171-59-3		HMDB0010405	1268689	1552588	1824183	1527330	1947908	1914780
2618	1-linolenoyl-GPC (18:3)*	Lipid	Lysophospholipid	45951	LC/MS Pos Late	1410	518.324			C04100	HMDB0010388	2905805	3475169	8254275	4441586	8067462	5867111
2675	1-linolenoyl-GPE (18:3)*	Lipid	Lysophospholipid	57509	LC/MS Pos Late	1420	476.277	52925148			HMDB0011509,HMDB0011479	430981	594001	764653	686372	1129917	731720
2587	1-linoleoyl-GPA (18:2)*	Lipid	Lysophospholipid	52690	LC/MS Neg	5483	433.236				HMDB0007856					416149
2616	1-linoleoyl-GPC (18:2)	Lipid	Lysophospholipid	34419	LC/MS Pos Late	1465	520.34	11988421		C04100	HMDB0010386	317587392	464287168	513933184	489708320	493788128	464436384
2673	1-linoleoyl-GPE (18:2)*	Lipid	Lysophospholipid	36600	LC/MS Pos Late	1482	478.293	52925130			HMDB0011507	17533174	25255088	30060468	26760652	29386128	24293010
2715	1-linoleoyl-GPG (18:2)*	Lipid	Lysophospholipid	54885	LC/MS Neg	5516	507.273					300895	474186	384966	371103	392076	248076
2725	1-linoleoyl-GPI* (18:2)*	Lipid	Lysophospholipid	36594	LC/MS Neg	5494	595.289	11124828				1929466	3310248	5130103	2541548	2868909	1227849
2606	1-margaroyl-GPC (17:0)	Lipid	Lysophospholipid	44682	LC/MS Pos Late	1566	510.355	24779463	50930-23-9	C04230	HMDB0012108	6902604	9638731	13724025	11347978	10154083	9289409
2668	1-margaroyl-GPE (17:0)*	Lipid	Lysophospholipid	37419	LC/MS Neg	6218	466.294	52925149			HMDB0061691		183179	230315		166419
2595	1-myristoyl-GPC (14:0)	Lipid	Lysophospholipid	45453	LC/MS Pos Late	1428	468.308	460604	20559-16-4	C04230	HMDB0010379	4829641	4759670	13187058	8194920	11206390	12395207
2621	1-nonadecanoyl-GPC (19:0)	Lipid	Lysophospholipid	47087	LC/MS Pos Late	1655	538.387		108273-88-7			605426	798088	1021634	877329	895809	839391
2613	1-oleoyl-GPC (18:1)	Lipid	Lysophospholipid	48258	LC/MS Pos Late	1540	522.355	16081932	19420-56-5	C03916	HMDB0002815	182475248	235035600	268041664	214427664	202560768	196074144
2671	1-oleoyl-GPE (18:1)	Lipid	Lysophospholipid	35628	LC/MS Pos Late	1554	480.308	9547071	89576-29-4		HMDB0011506	12449268	16263394	16514921	14743591	14317231	12586151
2713	1-oleoyl-GPG (18:1)*	Lipid	Lysophospholipid	45968	LC/MS Neg	5610	509.288						361117	449862	331988	393084	195422
2723	1-oleoyl-GPI (18:1)	Lipid	Lysophospholipid	36602	LC/MS Neg	5599	597.304	86289645			HMDB0061693	1576313	2245670	4620408	2180089	2494832	633789
2602	1-palmitoleoyl-GPC* (16:1)*	Lipid	Lysophospholipid	33230	LC/MS Pos Late	1450	494.324	24779461			HMDB0010383	10456571	13711613	17786972	16063403	12225045	12624408
2582	1-palmitoyl-GPA (16:0)	Lipid	Lysophospholipid	34428	LC/MS Neg	5600	409.236	6419701	17618-08-5	C04036	HMDB00327	189702	191232	246949	165908	130831	76678
2600	1-palmitoyl-GPC (16:0)	Lipid	Lysophospholipid	33955	LC/MS Pos Late	1525	496.34	86554	17364-16-8	C04102	HMDB0010382	447069952	677398976	783556416	648232448	641514240	666077056
2662	1-palmitoyl-GPE (16:0)	Lipid	Lysophospholipid	35631	LC/MS Pos Late	1544	454.293	9547069	53862-35-4		HMDB0011503	4524617	6584071	7490100	5592864	8477923	7941717
2708	1-palmitoyl-GPG (16:0)*	Lipid	Lysophospholipid	45970	LC/MS Neg	5570	483.273	3300276				179290	228447	215560	247729	208769	155823
2717	1-palmitoyl-GPI* (16:0)	Lipid	Lysophospholipid	35305	LC/MS Neg	5564	571.289	71296207			HMDB0061695	329118	709138	2570884	1075851	1000539	184858
2599	1-pentadecanoyl-GPC (15:0)*	Lipid	Lysophospholipid	37418	LC/MS Pos Late	1474	482.324	24779458			HMDB0010381	3255608	3508491	7716297	5986104	4999802	5365271
2611	1-stearoyl-GPC (18:0)	Lipid	Lysophospholipid	33961	LC/MS Pos Late	1606	524.371	497300	19420-57-6		HMDB0010384	197967056	284350496	347118976	266274992	311367296	277887680
2669	1-stearoyl-GPE (18:0)	Lipid	Lysophospholipid	42398	LC/MS Pos Late	1626	482.324	9547068	69747-55-3		HMDB0011130	5673181	9771656	11030837	8077194	9126981	10679279
2721	1-stearoyl-GPI (18:0)	Lipid	Lysophospholipid	19324	LC/MS Neg	5794	599.32	71581135;42607495	796963-93-4		HMDB0240261	2187176	5420253	13244439	5786342	4929761	1995869
2633	2-arachidonoyl-GPC* (20:4)*	Lipid	Lysophospholipid	33387	LC/MS Neg	5965	618.341	52924038			HMDB0061699	687769	1187189	1823689	688092	770473	219273
2687	2-arachidonoyl-GPE* (20:4)*	Lipid	Lysophospholipid	32815	LC/MS Neg	5793	500.278	53480936			HMDB0011487	59816	1066804	1320870	943105	1094550	679692
2646	2-docosahexaenoyl-GPC* (22:6)*	Lipid	Lysophospholipid	46203	LC/MS Neg	5760	642.341				HMDB0010404		364155			353332
2698	2-docosahexaenoyl-GPE (22:6)*	Lipid	Lysophospholipid	34258	LC/MS Neg	5707	524.278				HMDB0011496					768143	282549
2617	2-linoleoyl-GPC* (18:2)*	Lipid	Lysophospholipid	35257	LC/MS Neg	6013.2	594.341	71768169				6617615	12709966	15465369	10459283	12309875	6756461
2674	2-linoleoyl-GPE* (18:2)*	Lipid	Lysophospholipid	36593	LC/MS Neg	5813	476.278				HMDB11477	1543840	3889062	3473734	2754116	3158592	1785045
2596	2-myristoyl-GPC* (14:0)*	Lipid	Lysophospholipid	35626	LC/MS Pos Late	1399	468.308	460604			HMDB0010379	369374	369489	1053452	641228	939802	1052277
2614	2-oleoyl-GPC* (18:1)*	Lipid	Lysophospholipid	48259	LC/MS Neg	6150	596.357	24779494			HMDB0061701	3483239	5953183	7049957	4156603	4665569	2866975
2672	2-oleoyl-GPE* (18:1)*	Lipid	Lysophospholipid	45455	LC/MS Neg	6000	478.294				HMDB11476	1076137	2175391	2037926	1332790	1425375	687593
2601	2-palmitoyl-GPC* (16:0)*	Lipid	Lysophospholipid	35253	LC/MS Neg	6215	570.341	15061532			HMDB0061702	11156017	20514754	27761190	16416749	20604784	11029720
2663	2-palmitoyl-GPE* (16:0)*	Lipid	Lysophospholipid	45452	LC/MS Neg	5919	452.278				HMDB11503	419355	972115	1121948	528380	953864	583091
2612	2-stearoyl-GPC* (18:0)*	Lipid	Lysophospholipid	35255	LC/MS Neg	6620	598.373	24779491				1135667	3953965	4571957	2429780	2055476	4111088
2670	2-stearoyl-GPE (18:0)*	Lipid	Lysophospholipid	41220	LC/MS Neg	6350	480.31	90658453;53480667			HMDB0011129	1107636	2223408	2629175	1622799	2003556	1302884
2722	2-stearoyl-GPI (18:0)*	Lipid	Lysophospholipid	39223	LC/MS Neg	5728	599.32	131770413				93877	390038	937740	383462	368527	139376
2835	1-(1-enyl-oleoyl)-GPC (P-18:1)*	Lipid	Lysoplasmalogen	52701	LC/MS Pos Late	1547	506.361	52923882			HMDB0010408	455298	506269	752483	525962	353460	385832
2836	1-(1-enyl-oleoyl)-GPE (P-18:1)*	Lipid	Lysoplasmalogen	44621	LC/MS Pos Late	1566	464.314					887091	1040750	1245634	527140	496817	685045
2833	1-(1-enyl-palmitoyl)-GPC (P-16:0)*	Lipid	Lysoplasmalogen	52474	LC/MS Pos Late	1547	480.345	10917802			HMDB0010407	2052084	2772101	4780200	3444169	3318308	3473155
2834	1-(1-enyl-palmitoyl)-GPE (P-16:0)*	Lipid	Lysoplasmalogen	39270	LC/MS Pos Late	1558	438.298				HMDB0011152	1067171	1178798	2218532	1344768	1050209	1342737
2837	1-(1-enyl-stearoyl)-GPC (P-18:0)*	Lipid	Lysoplasmalogen	52702	LC/MS Pos Late	1645	508.376	24779527			HMDB0013122	288056	485035	630323	534033	548865	534675
2838	1-(1-enyl-stearoyl)-GPE (P-18:0)*	Lipid	Lysoplasmalogen	39271	LC/MS Pos Late	1649	466.329					970280	1267205	2566961	1535810	1263050	1672942
2830	1-palmityl-GPC (O-16:0)	Lipid	Lysoplasmalogen	20458	LC/MS Pos Late	1573	482.361	3983	52691-62-0			1789470	2359943	4950084	3376081	2932206	2837063
2829	1-palmityl-GPE (O-16:0)*	Lipid	Lysoplasmalogen	55007	LC/MS Pos Late	1570	440.314						96372	141116	99700		50253
2831	1-stearyl-GPC (O-18:0)*	Lipid	Lysoplasmalogen	52703	LC/MS Pos Late	1653	510.392	2733532		C04317	HMDB0011149	502838	715664	1690153	1036798	896840	942346
1500	10-undecenoate (11:1n1)	Lipid	Medium Chain Fatty Acid	32497	LC/MS Neg	5085.8	183.139	14891	1333-28-4	C13910	HMDB0033724	2167982	3930169	1984463	1245881	680760	1274771
1504	5-dodecenoate (12:1n7)	Lipid	Medium Chain Fatty Acid	33968	LC/MS Neg	5224	197.155	5312378	2430-94-6		HMDB0000529	5344893	10612795	742954	1018332	1926001	687842
1494	caprate (10:0)	Lipid	Medium Chain Fatty Acid	1642	LC/MS Neg	5090.7	171.139	2969	334-48-5	C01571	HMDB0000511	118706816	174107744	65606008	79561208	293947584	133260264
1489	caproate (6:0)	Lipid	Medium Chain Fatty Acid	32489	LC/MS Neg	2713.7	115.076	8892	142-62-1	C01585	HMDB0000535	2135402	3616553	2052221	2089165	2114460	1744452
1491	caprylate (8:0)	Lipid	Medium Chain Fatty Acid	32492	LC/MS Neg	4362	143.108	379	124-07-2	C06423	HMDB0000482	52459100	86454952	46507688	51816120	385613728	135219936
1502	laurate (12:0)	Lipid	Medium Chain Fatty Acid	1645	LC/MS Neg	5300	199.17	3893	143-07-7	C02679	HMDB0000638	59881096	112759120	28081462	22166112	121250576	36045088
454	alpha-ketobutyrate	Amino Acid	Methionine, Cysteine, SAM and Taurine Metabolism	4968	LC/MS Polar	940	101.024	58	600-18-0	C00109	HMDB0000005	2250969	5952146	3638008	4135546	8018993	2719329
453	cystathionine	Amino Acid	Methionine, Cysteine, SAM and Taurine Metabolism	15705	LC/MS Pos Early	2270	223.075	439258	535-34-2	C02291	HMDB0000099	307220	280163	400062	312944	829104	450603
455	cysteine	Amino Acid	Methionine, Cysteine, SAM and Taurine Metabolism	1868	LC/MS Pos Early	1475	122.027	5862	52-90-4;56-89-3	C00097	HMDB0000574	5087400	4837775	4557784	5256867	10004119	7271898
461	cysteine s-sulfate	Amino Acid	Methionine, Cysteine, SAM and Taurine Metabolism	22176	LC/MS Polar	2273	199.969	115015	1637-71-4	C05824	HMDB0000731	1088111	1337942	1434312	1107653	2445129	2496770
468	cysteine sulfinic acid	Amino Acid	Methionine, Cysteine, SAM and Taurine Metabolism	37443	LC/MS Pos Early	597	154.017	109	207121-48-0	C00606	HMDB0000996
462	cystine	Amino Acid	Methionine, Cysteine, SAM and Taurine Metabolism	56	LC/MS Pos Early	2000	241.031	67678	56-89-3	C00491	HMDB0000192	13709688	22300140	17066354	19589096	11387663	66192688
470	hypotaurine	Amino Acid	Methionine, Cysteine, SAM and Taurine Metabolism	590	LC/MS Pos Early	724	110.027	107812	300-84-5	C00519	HMDB0000965			508739			813188
466	lanthionine	Amino Acid	Methionine, Cysteine, SAM and Taurine Metabolism	42002	LC/MS Pos Early	1730	209.059	98504	3183-08-02			654882	568970	681741	687919	1984869	941293
434	methionine	Amino Acid	Methionine, Cysteine, SAM and Taurine Metabolism	1302	LC/MS Pos Early	2526	150.058	6137	63-68-3	C00073	HMDB0000696	265183616	263133440	306561920	308602240	399835776	370200672
439	methionine sulfone	Amino Acid	Methionine, Cysteine, SAM and Taurine Metabolism	44878	LC/MS Pos Early	1250	182.048	69961	820-10-0		HMDB0062174	1181020	1509088	1454777	1233455	1900886	1621710
440	methionine sulfoxide	Amino Acid	Methionine, Cysteine, SAM and Taurine Metabolism	18374	LC/MS Pos Early	1272	166.053	158980	3226-65-1	C02989	HMDB0002005	22510812	32400956	29268976	26134848	21208440	11862272
435	N-acetylmethionine	Amino Acid	Methionine, Cysteine, SAM and Taurine Metabolism	1589	LC/MS Neg	1787	190.054	448580	65-82-7	C02712	HMDB0011745	1054511	1044058	881311	881613	974033	1040349
473	N-acetyltaurine	Amino Acid	Methionine, Cysteine, SAM and Taurine Metabolism	48187	LC/MS Neg	800	166.018	159864			HMDB0240253	3146747	3518363	3005975	2187035	2074288	2873858
437	N-formylmethionine	Amino Acid	Methionine, Cysteine, SAM and Taurine Metabolism	2829	LC/MS Neg	1543.8	176.039	439750	4289-98-9	C03145	HMDB0001015	1934226	2200159	1997501	1910757	2477526	2420163
446	S-adenosylhomocysteine (SAH)	Amino Acid	Methionine, Cysteine, SAM and Taurine Metabolism	42382	LC/MS Neg	1832.4	383.114	439155	979-92-0	C00021	HMDB00939						20106
457	S-methylcysteine	Amino Acid	Methionine, Cysteine, SAM and Taurine Metabolism	39592	LC/MS Neg	880	134.028	88180;7058174;24417	1187-84-4		HMDB0002108	1001746	953579	756455	902136	1136072	1127148
458	S-methylcysteine sulfoxide	Amino Acid	Methionine, Cysteine, SAM and Taurine Metabolism	43378	LC/MS Pos Early	900	152.038	82142	6853-87-8		HMDB0029432	2621037	3482087	2476248	2517719	3369939	3036621
438	S-methylmethionine	Amino Acid	Methionine, Cysteine, SAM and Taurine Metabolism	38127	LC/MS Pos Early	2555	164.074	458	3493-12-07	C05319	HMDB0038670	102406
471	taurine	Amino Acid	Methionine, Cysteine, SAM and Taurine Metabolism	2125	LC/MS Neg	690	124.007	1123	107-35-7	C00245	HMDB0000251	4896380	7112090	9401155	3900737	5147838	14264409
3175	3-hydroxy-3-methylglutarate	Lipid	Mevalonate Metabolism	531	LC/MS Polar	2850	161.046	1662;5459993	503-49-1	C03761	HMDB0000355	4049120	6401852	6058349	4570640	4964052	4752860
1205	pyroglutamylglutamine	Peptide	Modified Peptides	22194	LC/MS Neg	855	256.094	14889607	109481-23-4		HMDB39229	51413	50778	75741	53666	60072	34191
1218	pyroglutamylvaline	Peptide	Modified Peptides	32394	LC/MS Neg	1755	227.104	152416	21282-10-0			73739	83955	172674	69550	50815	70618
2862	1-arachidonylglycerol (20:4)	Lipid	Monoacylglycerol	34397	LC/MS Neg	6250	303.233	16019980;5282281	35474-99-8	C13857	HMDB11578		421913	343828		198120
2861	1-dihomo-linolenylglycerol (20:3)	Lipid	Monoacylglycerol	48341	LC/MS Neg	6400	305.249						123814	303161
2857	1-linolenoylglycerol (18:3)	Lipid	Monoacylglycerol	34393	LC/MS Neg	6214	277.217	53480978	124151-74-2		HMDB0011569	288633		467975	131128	222700
2856	1-linoleoylglycerol (18:2)	Lipid	Monoacylglycerol	27447	LC/MS Neg	6477	279.233	5283469	2277-28-3		HMDB0011568	5738717	8533210	7735284	6035474	4746640	2897773
2848	1-myristoylglycerol (14:0)	Lipid	Monoacylglycerol	35625	LC/MS Neg	6353.3	227.202	10957631	75685-84-6	C01885	HMDB0011561	2116407	1995469	2161504	1874816	1488108	1680790
2855	1-oleoylglycerol (18:1)	Lipid	Monoacylglycerol	21184	LC/MS Neg	6650	281.249	5283468	111-03-5		HMDB0011567	15225789	21278080	16779014	15253322	11947879	8128271
2851	1-palmitoylglycerol (16:0)	Lipid	Monoacylglycerol	21127	LC/MS Neg	6550	255.233	14900	542-44-9		HMDB0011564	52945824	92324392	30583950	61359864	51756944	17067430
2872	2-linoleoylglycerol (18:2)	Lipid	Monoacylglycerol	32506	LC/MS Neg	6250	279.233	5365676	3443-82-1		HMDB0011538	567807	922950	2451748	1183104	1194290
2871	2-oleoylglycerol (18:1)	Lipid	Monoacylglycerol	21232	LC/MS Neg	6500	281.249	5319879	3443-84-3		HMDB0011537	1525172	3250846	117077		182614
4315	1-methylnicotinamide	Cofactors and Vitamins	Nicotinate and Nicotinamide Metabolism	27665	LC/MS Pos Early	1940	137.071	457	1005-24-9	C02918	HMDB0000699	1390828	1307729	2973249	2281423	1044107	2242958
4323	N1-Methyl-2-pyridone-5-carboxamide	Cofactors and Vitamins	Nicotinate and Nicotinamide Metabolism	40469	LC/MS Neg	1668	151.051	69698	701-44-0	C05842	HMDB0004193	10069318	9772716	7227017	8142976	7579784	7473410
4303	nicotinamide	Cofactors and Vitamins	Nicotinate and Nicotinamide Metabolism	594	LC/MS Pos Early	1942	123.055	936	98-92-0	C00153	HMDB0001406	2300452	2191199	3691190	2377597	2529536	2965591
4306	nicotinamide riboside	Cofactors and Vitamins	Nicotinate and Nicotinamide Metabolism	33013	LC/MS Pos Early	2040	255.098	439924	1341-23-7	C03150	HMDB0000855
4299	quinolinate	Cofactors and Vitamins	Nicotinate and Nicotinamide Metabolism	1899	LC/MS Pos Early	845	168.029	1066	89-00-9	C03722	HMDB0000232	771365	664190	929652	639885	416388	540296
4321	trigonelline (N'-methylnicotinate)	Cofactors and Vitamins	Nicotinate and Nicotinamide Metabolism	32401	LC/MS Pos Early	1388	138.055	5570	535-83-1	C01004	HMDB0000875	17333992	13879777	27581856	29246958	23170128	30934690
1468	phosphate	Energy	Oxidative Phosphorylation	42109	LC/MS Pos Early	576	98.9842	1061	7664-38-2	C00009	HMDB0001429	224430224	203028208	191753264	185551632	221057136	191333328
4335	pantothenate (Vitamin B5)	Cofactors and Vitamins	Pantothenate and CoA Metabolism	1508	LC/MS Neg	1498.7	218.103	6613	137-08-6	C00864	HMDB0000210	29114302	32387090	35342512	33453356	21832240	23405672
6450	glutamine_degradant*	Partially Characterized Molecules	Partially Characterized Molecules	46225	LC/MS Pos Early	1900	129.066		2353-44-8			21587252	30101384	27732574	24333500	21978684	22252484
1277	arabitol/xylitol	Carbohydrate	Pentose Metabolism	48885	LC/MS Polar	1932.4	151.061	6912;94154		C00542,C01904,C00379	HMDB0002917,HMDB0001851,HMDB0000568	1586236	1381263	1833363	1417054	1125622	1366837
1283	arabonate/xylonate	Carbohydrate	Pentose Metabolism	48255	LC/MS Polar	2700	165.041	122045;6602431		C00502,C05411	HMDB0000539	5575580	5883806	4721258	7456819	6088034	3934641
1262	ribitol	Carbohydrate	Pentose Metabolism	15772	LC/MS Polar	1789.6	151.061	6912	488-81-3	C00532,C01904,C00474,C00379	HMDB0002917,HMDB0000508,HMDB0001851,HMDB0000568	235633	190683	245543	217538	217485	185397
1263	ribonate	Carbohydrate	Pentose Metabolism	27731	LC/MS Polar	2425	165.041	5460677	5336-08-03	C01685	HMDB0000867	12960866	12067582	11887710	14031035	10621544	9643851
1261	ribose	Carbohydrate	Pentose Metabolism	1471	LC/MS Polar	1508.2	195.051	5779	50-69-1	C00121	HMDB0000283						184494
1267	xylose	Carbohydrate	Pentose Metabolism	15581	LC/MS Polar	1727	195.051	135191	609-06-3	C00181	HMDB0000098	873922	1065108	649526	458949	230957	1136860
146	1-carboxyethylphenylalanine	Amino Acid	Phenylalanine Metabolism	62566	LC/MS Neg	2844	236.093	59100900				292545	441749	415029	375442	367636	478170
156	2-hydroxyphenylacetate	Amino Acid	Phenylalanine Metabolism	1432	LC/MS Polar	858.6	151.04	11970	614-75-5	C05852	HMDB0000669	783980	1713246	1107198	1541660	1461274	1307880
159	4-hydroxyphenylacetate	Amino Acid	Phenylalanine Metabolism	541	LC/MS Neg	1361	151.04	127	156-38-7	C00642	HMDB0000020	197732	213791	351884	147601	168121	213746
141	N-acetylphenylalanine	Amino Acid	Phenylalanine Metabolism	33950	LC/MS Neg	2597	206.082	74839	2018-61-3	C03519	HMDB0000512	277640	259891	382444	242014	193995	223551
155	phenylacetate	Amino Acid	Phenylalanine Metabolism	15958	LC/MS Neg	2150	135.045	999	103-82-2	C07086	HMDB0000209	107273	194559	101957	81204		182416
140	phenylalanine	Amino Acid	Phenylalanine Metabolism	64	LC/MS Pos Early	2878	166.086	6140	63-91-2	C00079	HMDB0000159	862643392	918533760	903925952	873700928	896790208	896065984
151	phenyllactate (PLA)	Amino Acid	Phenylalanine Metabolism	22130	LC/MS Neg	2208	165.056	3848	828-01-3	C05607	HMDB0000779,HMDB0000563	542432	737929	735137	656899	528149	671461
150	phenylpyruvate	Amino Acid	Phenylalanine Metabolism	566	LC/MS Neg	2515	163.04	997	156-06-9	C00166	HMDB0000205	179494	173648	222762	236082	144186	238522
2359	1,2-dilinoleoyl-GPC (18:2/18:2)	Lipid	Phosphatidylcholine (PC)	52603	LC/MS Pos Late	2100	782.569	5288075	998-06-1		HMDB0008138	356740480	489470784	567586304	454298432	509557280	382349792
2278	1,2-dipalmitoyl-GPC (16:0/16:0)	Lipid	Phosphatidylcholine (PC)	19130	LC/MS Pos Late	2450	734.569	452110	63-89-8	D03585	HMDB0000564	93177240	91035048	108235192	86303120	109189256	123865960
2374	1-arachidoyl-2-arachidonoyl-GPC (20:0/20:4)*	Lipid	Phosphatidylcholine (PC)	55062	LC/MS Pos Late	2523	838.632	24779048			HMDB0008279	8375782	6620209	9539835	5259530	6860996	9891191
2365	1-linoleoyl-2-arachidonoyl-GPC (18:2/20:4n6)*	Lipid	Phosphatidylcholine (PC)	52710	LC/MS Pos Late	2000	806.569	24778979		C05208	HMDB0008147	113147368	104764552	163148960	156472224	131089928	120467672
2369	1-linoleoyl-2-docosahexaenoyl-GPC (18:2/22:6)*	Lipid	Phosphatidylcholine (PC)	53199	LC/MS Pos Late	1871	830.569	24778983			HMDB0008156	13504821	18024820	15585842	13652527	21786922	23544860
2360	1-linoleoyl-2-linolenoyl-GPC (18:2/18:3)*	Lipid	Phosphatidylcholine (PC)	53176	LC/MS Pos Late	1939	780.554	52922731			HMDB0008141	27339598	31137056	33259114	31712564	40023284	26491932
2318	1-margaroyl-2-arachidonoyl-GPC (17:0/20:4)*	Lipid	Phosphatidylcholine (PC)	53193	LC/MS Pos Late	2165	796.585					23628706	23059120	21447812	22029536	18042790	18903436
2319	1-margaroyl-2-docosahexaenoyl-GPC (17:0/22:6)*	Lipid	Phosphatidylcholine (PC)	53198	LC/MS Pos Late	2084	820.585					8100839	10206530	4270169	4456300	11227047	10470149
2317	1-margaroyl-2-linoleoyl-GPC (17:0/18:2)*	Lipid	Phosphatidylcholine (PC)	52500	LC/MS Pos Late	2242	772.585	52922491				181578720	206508528	198738272	200060768	194576896	165097600
2266	1-myristoyl-2-arachidonoyl-GPC (14:0/20:4)*	Lipid	Phosphatidylcholine (PC)	53195	LC/MS Pos Late	1950	754.538	24778634			HMDB0007883	14346057	9247310	28592940	19901260	26925508	32244332
2268	1-myristoyl-2-docosahexaenoyl-GPC (14:0/22:6)*	Lipid	Phosphatidylcholine (PC)	53196	LC/MS Pos Late	1910	778.538	24778639			HMDB0007892	6942599	5088825	6721606	4561314	15641681	15600192
2265	1-myristoyl-2-linoleoyl-GPC (14:0/18:2)*	Lipid	Phosphatidylcholine (PC)	52707	LC/MS Pos Late	2050	730.538	24778624			HMDB0007874	65078624	52310780	119347808	82267536	116867200	123503416
2263	1-myristoyl-2-palmitoleoyl-GPC (14:0/16:1)*	Lipid	Phosphatidylcholine (PC)	55003	LC/MS Pos Late	1955	704.523	24778615			HMDB0007870	2753761	2576281	9725076	4595842	12970434	10295161
2262	1-myristoyl-2-palmitoyl-GPC (14:0/16:0)	Lipid	Phosphatidylcholine (PC)	19258	LC/MS Pos Late	2250	706.538	129657	69525-80-0		HMDB0007869	14953320	12143559	41085960	21984460	41594912	36441184
2358	1-oleoyl-2-docosahexaenoyl-GPC (18:1/22:6)*	Lipid	Phosphatidylcholine (PC)	52697	LC/MS Pos Late	2100	832.585	24778955			HMDB0008123	65420616	79516328	48400732	43823816	64888224	64823304
2310	1-palmitoleoyl-2-linolenoyl-GPC (16:1/18:3)*	Lipid	Phosphatidylcholine (PC)	53180	LC/MS Pos Late	1900	754.538	52922452			HMDB0008008	3676188	3233572	5297658	4631720	4878426	4390279
2287	1-palmitoyl-2-(hydroxylinoleoyl)-GPC (16:0/18:2(OH))*	Lipid	Phosphatidylcholine (PC)	57415	LC/MS Pos Late	1744	774.564					18549864	19054492	11989084	11123213	784894	651966
2299	1-palmitoyl-2-adrenoyl-GPC (16:0/22:4)*	Lipid	Phosphatidylcholine (PC)	52706	LC/MS Pos Late	2336	810.601	24778732			HMDB0007988	85641216	93889248	173503168	157099696	119091360	112773336
2297	1-palmitoyl-2-arachidonoyl-GPC (16:0/20:4n6)	Lipid	Phosphatidylcholine (PC)	52462	LC/MS Pos Late	2200	782.569	10747814	35418-58-7	C05208	HMDB0007982	1272539520	1336683520	1496922496	1331787008	1449308416	1360195200
2303	1-palmitoyl-2-docosahexaenoyl-GPC (16:0/22:6)	Lipid	Phosphatidylcholine (PC)	52610	LC/MS Pos Late	2055	806.569	6441886	59403-54-2		HMDB0007991	620294464	815597056	480946272	483016544	877555008	934659328
2298	1-palmitoyl-2-eicosapentaenoyl-GPC (16:0/20:5)*	Lipid	Phosphatidylcholine (PC)	52463	LC/MS Pos Late	1989	780.554	24778723			HMDB0007984	149061728	123996912	184761280	187616192	283244544	287775616
2286	1-palmitoyl-2-linoleoyl-GPC (16:0/18:2)	Lipid	Phosphatidylcholine (PC)	42446	LC/MS Pos Late	2160	758.569	5287971	40811-94-7		HMDB0007973	2438091776	2576279040	2735056640	2657482496	2754102272	2598655488
2283	1-palmitoyl-2-oleoyl-GPC (16:0/18:1)	Lipid	Phosphatidylcholine (PC)	52461	LC/MS Pos Late	2450	760.585	6436017	26853-31-6;26853-31-6	C13875	HMDB0007972	1561214080	1667132032	1850977024	1692163328	1703753216	1563375488
2279	1-palmitoyl-2-palmitoleoyl-GPC (16:0/16:1)*	Lipid	Phosphatidylcholine (PC)	52470	LC/MS Pos Late	2200	732.554	6443788			HMDB0007969	82013296	73656080	155801440	102033336	115132384	108461696
2281	1-palmitoyl-2-stearoyl-GPC (16:0/18:0)	Lipid	Phosphatidylcholine (PC)	52616	LC/MS Pos Late	2750	762.601	24778686	59403-51-9	C03889	HMDB0007970	57391088	45848936	75528752	39005300	65531624	69344008
2272	1-pentadecanoyl-2-arachidonoyl-GPC (15:0/20:4)*	Lipid	Phosphatidylcholine (PC)	53194	LC/MS Pos Late	2000	768.554	52922330			HMDB0007949	9190750	9012954	14774522	13985736	9479051	10173399
2273	1-pentadecanoyl-2-docosahexaenoyl-GPC (15:0/22:6)*	Lipid	Phosphatidylcholine (PC)	53197	LC/MS Pos Late	1925	792.554	52922342			HMDB0007958	6937280	6796247	4740016	5415844	8684338	9738571
2271	1-pentadecanoyl-2-linoleoyl-GPC (15:0/18:2)*	Lipid	Phosphatidylcholine (PC)	52497	LC/MS Pos Late	2057	744.554	24778664			HMDB0007940	53393140	54693136	76950080	80546680	70577264	61313760
2336	1-stearoyl-2-adrenoyl-GPC (18:0/22:4)*	Lipid	Phosphatidylcholine (PC)	55061	LC/MS Pos Late	2444	838.632	24778868			HMDB0008054	36790096	44050216	84364336	73101544	41136304	39187500
2333	1-stearoyl-2-arachidonoyl-GPC (18:0/20:4)	Lipid	Phosphatidylcholine (PC)	42450	LC/MS Pos Late	2400	810.601	16219824	35418-59-8		HMDB0008048	1366989440	1381626112	1407224576	1271437312	1287727872	1161255424
2329	1-stearoyl-2-dihomo-linolenoyl-GPC (18:0/20:3n3 or 6)*	Lipid	Phosphatidylcholine (PC)	52629	LC/MS Pos Late	2484	812.616				HMDB0008047	631048768	681349824	888545984	850964416	819682944	709303360
2339	1-stearoyl-2-docosahexaenoyl-GPC (18:0/22:6)	Lipid	Phosphatidylcholine (PC)	52611	LC/MS Pos Late	2300	834.601	24778876	59403-52-0		HMDB0008057	332692768	360310208	192699968	169865504	411634656	384121440
2337	1-stearoyl-2-docosapentaenoyl-GPC (18:0/22:5n3)*	Lipid	Phosphatidylcholine (PC)	52699	LC/MS Pos Late	2282	836.616	24778873			HMDB0008056	92025416	87572416	120828888	106714104	95474248	81959624
2338	1-stearoyl-2-docosapentaenoyl-GPC (18:0/22:5n6)*	Lipid	Phosphatidylcholine (PC)	52700	LC/MS Pos Late	2369	836.616	24778871			HMDB0008055	7751141	10075240	13473617	13392220	10141132	11977381
2325	1-stearoyl-2-linoleoyl-GPC (18:0/18:2)*	Lipid	Phosphatidylcholine (PC)	52452	LC/MS Pos Late	2450	786.601	6441487			HMDB0008039	2822180096	2752414720	2816519424	2661464320	2887663872	2532822016
2322	1-stearoyl-2-oleoyl-GPC (18:0/18:1)	Lipid	Phosphatidylcholine (PC)	52438	LC/MS Pos Late	2644	788.616	24778825	56421-10-4		HMDB0008038	895147456	782630336	1064143488	777871424	948812544	709610880
2259	phosphatidylcholine (14:0/14:0, 16:0/12:0)	Lipid	Phosphatidylcholine (PC)	53177	LC/MS Pos Late	1972	678.507					986224	895313	7960516	2492876	22725284	15907580
2270	phosphatidylcholine (15:0/18:1, 17:0/16:1, 16:0/17:1)*	Lipid	Phosphatidylcholine (PC)	53178	LC/MS Pos Late	2224	746.569					35959400	38855696	64506392	48345096	46396944	36504608
2301	phosphatidylcholine (16:0/22:5n3, 18:1/20:4)*	Lipid	Phosphatidylcholine (PC)	52719	LC/MS Pos Late	2100	808.585					301157408	332013664	398795680	373122496	262785040	268808704
2328	phosphatidylcholine (18:0/20:2, 20:0/18:2)*	Lipid	Phosphatidylcholine (PC)	53192	LC/MS Pos Late	2639	814.632					106582312	86189616	133317664	93894000	135011504	97463408
2444	1-oleoyl-2-linoleoyl-GPE (18:1/18:2)*	Lipid	Phosphatidylethanolamine (PE)	52687	LC/MS Pos Late	2270	742.538	9546753			HMDB0005349	26771912	32777466	30667036	27992892	27802446	22192936
2416	1-palmitoyl-2-arachidonoyl-GPE (16:0/20:4)*	Lipid	Phosphatidylethanolamine (PE)	52464	LC/MS Pos Late	2250	740.523	9546800		C05210	HMDB0005323	8237373	11802156	12565528	11593876	9106316	15966784
2418	1-palmitoyl-2-docosahexaenoyl-GPE (16:0/22:6)*	Lipid	Phosphatidylethanolamine (PE)	52465	LC/MS Pos Late	2160	764.523	9546799			HMDB0008946	13080324	21737728	9108074	9821451	20104064	27536764
2410	1-palmitoyl-2-linoleoyl-GPE (16:0/18:2)	Lipid	Phosphatidylethanolamine (PE)	42449	LC/MS Pos Late	2350	716.523	9546747			HMDB0005322	17861762	23954262	27271230	25436100	26304626	22572952
2408	1-palmitoyl-2-oleoyl-GPE (16:0/18:1)	Lipid	Phosphatidylethanolamine (PE)	19263	LC/MS Pos Late	2600	718.538	5283496	26662-94-2		HMDB0005320	11559605	15840701	21414480	12935223	10803694	18473668
2438	1-stearoyl-2-arachidonoyl-GPE (18:0/20:4)	Lipid	Phosphatidylethanolamine (PE)	52447	LC/MS Pos Late	2475	768.554	5289133		C05210	HMDB0009003	56526772	81563680	76805816	57821384	50388564	112549320
2434	1-stearoyl-2-dihomo-linolenoyl-GPE (18:0/20:3n3 or 6)*	Lipid	Phosphatidylethanolamine (PE)	57336	LC/MS Pos Late	2650	770.569	52924903			HMDB0009002	8018720	9592422	13097647	11063962	9807454	11543913
2442	1-stearoyl-2-docosahexaenoyl-GPE (18:0/22:6)*	Lipid	Phosphatidylethanolamine (PE)	52466	LC/MS Pos Late	2375	792.554	9546798			HMDB0009012	13506271	10852697	9116523	8751887	19958840	23362348
2440	1-stearoyl-2-docosapentaenoyl-GPE (18:0/22:5n3)*	Lipid	Phosphatidylethanolamine (PE)	57337	LC/MS Pos Late	2415	794.569	53479612			HMDB0009011	1500434		2792302			4641020
2441	1-stearoyl-2-docosapentaenoyl-GPE (18:0/22:5n6)*	Lipid	Phosphatidylethanolamine (PE)	57338	LC/MS Pos Late	2515	794.569	53479611			HMDB0009010	1306941	1753734	2188176	2078591	1262436	1871877
2429	1-stearoyl-2-linoleoyl-GPE (18:0/18:2)*	Lipid	Phosphatidylethanolamine (PE)	52446	LC/MS Pos Late	2575	744.554	9546749			HMDB0008994	96532592	131091616	130864136	120927072	116303080	105500672
2425	1-stearoyl-2-oleoyl-GPE (18:0/18:1)	Lipid	Phosphatidylethanolamine (PE)	42448	LC/MS Pos Late	2950	746.569	9546742			HMDB0008993	20777776	26311544	28045950	21409916	21257064	25719910
2448	phosphatidylethanolamine (P-18:1/20:4, P-16:0/22:5n3)*	Lipid	Phosphatidylethanolamine (PE)	57411	LC/MS Pos Late	2243	750.543	53480850			HMDB0011360	67082232	65875424	100014832	77198544	66032544	70036664
2539	1-palmitoyl-2-arachidonoyl-GPI (16:0/20:4)*	Lipid	Phosphatidylinositol (PI)	52467	LC/MS Pos Late	2567	876.56				HMDB0009789	3015323	3723074	2929706	5195376	5181654	3657960
2536	1-palmitoyl-2-linoleoyl-GPI (16:0/18:2)	Lipid	Phosphatidylinositol (PI)	52450	LC/MS Pos Late	2730	852.56	46891795			HMDB0009784	2845002	1251764	4423446	1837188	4874331	1401357
2534	1-palmitoyl-2-oleoyl-GPI (16:0/18:1)*	Lipid	Phosphatidylinositol (PI)	52669	LC/MS Pos Late	3140	854.575	71296232			HMDB0009783	1567957		3006064	1009567	2717041	572179
2556	1-stearoyl-2-arachidonoyl-GPI (18:0/20:4)	Lipid	Phosphatidylinositol (PI)	52449	LC/MS Pos Late	3000	904.591		383907-33-3		HMDB0009815	42228996	60532996	64559364	50131236	56199112	56681852
2558	1-stearoyl-2-dihomo-linolenoyl-GPI (18:0/20:3n3 or 6)*	Lipid	Phosphatidylinositol (PI)	54984	LC/MS Pos Late	3271	906.607				HMDB0009814	4159735	7979060	9306873	9286269	8379165	7456754
2543	1-stearoyl-2-linoleoyl-GPI (18:0/18:2)	Lipid	Phosphatidylinositol (PI)	52468	LC/MS Polar	910	861.55				HMDB0009809	1166424	1449934	1307994	751214	1088205	1276828
2542	1-stearoyl-2-oleoyl-GPI (18:0/18:1)*	Lipid	Phosphatidylinositol (PI)	52726	LC/MS Pos Late	3711	882.607					2295231	2323050	3492580	2268367	3387288	1980785
2511	1-stearoyl-2-docosahexaenoyl-GPS (18:0/22:6)*	Lipid	Phosphatidylserine (PS)	52696	LC/MS Pos Late	2407	836.544	24779546	474943-18-5		HMDB0010167		193221				1444085
2505	1-stearoyl-2-oleoyl-GPS (18:0/18:1)	Lipid	Phosphatidylserine (PS)	19265	LC/MS Pos Late	3000	790.559	9547087			HMDB0010163	4527382	4228160	16369344	1028351	2074510	24478248
2232	choline	Lipid	Phospholipid Metabolism	15506	LC/MS Pos Early	1961	104.107	305	67-48-1	C00114	HMDB0000097	114128320	147860480	143116896	148650224	114141088	164931104
2233	phosphocholine	Lipid	Phospholipid Metabolism	34396	LC/MS Pos Early	700	184.073	1014	72556-74-2	C00588	HMDB0001565	2692692	2096909	2116348	1687954	3556433	10178335
2240	glycerophosphoethanolamine	Lipid	Phospholipid Metabolism	37455	LC/MS Pos Early	659	216.063	123874	33049-08-0	C01233	HMDB0000114	2713916	2841566	3957384	1849562	2208194	3304770
2242	glycerophosphoinositol*	Lipid	Phospholipid Metabolism	47155	LC/MS Polar	3850	333.059	167572	16824-65-0						1104137
2236	glycerophosphorylcholine (GPC)	Lipid	Phospholipid Metabolism	15990	LC/MS Pos Early	672	258.11	71920	28319-77-9	C00670	HMDB0000086	39403196	49290480	79938112	37018556	36174824	55094692
2238	phosphoethanolamine (PE)	Lipid	Phospholipid Metabolism	1600	LC/MS Pos Early	700	142.026	1015	1071-23-4	C00346	HMDB0000224	1214076	1095383	1530060	844833	1996177	7807183
2243	trimethylamine N-oxide	Lipid	Phospholipid Metabolism	40406	LC/MS Pos Early	2100	76.0757	1145	1184-78-7	C01104	HMDB0000925	13395119	9704136	19680000	8436207	8615136	18063160
2797	1-(1-enyl-oleoyl)-2-docosahexaenoyl-GPE (P-18:1/22:6)*	Lipid	Plasmalogen	55037	LC/MS Pos Late	2112	774.543	52925039			HMDB0011460	9402324	11332114	5739096	5897256	10313121	13503416
2813	1-(1-enyl-palmitoyl)-2-arachidonoyl-GPC (P-16:0/20:4)*	Lipid	Plasmalogen	52689	LC/MS Pos Late	2200	766.574				HMDB0011220	29322636	29883448	44583520	43350004	35870272	34710556
2804	1-(1-enyl-palmitoyl)-2-arachidonoyl-GPE (P-16:0/20:4)*	Lipid	Plasmalogen	52673	LC/MS Pos Late	2300	724.528	52925126			HMDB0011352	74401376	64373296	118093600	90367600	78716912	95398432
2798	1-(1-enyl-palmitoyl)-2-docosahexaenoyl-GPC (P-16:0/22:6)*	Lipid	Plasmalogen	52630	LC/MS Pos Late	2041	790.574	53480699			HMDB0011229	15695645	16774787	14991285	12488991	29677506	28595108
2805	1-(1-enyl-palmitoyl)-2-docosahexaenoyl-GPE (P-16:0/22:6)*	Lipid	Plasmalogen	52672	LC/MS Pos Late	2181	748.528	5283497			HMDB0005780	12245869	12779534	10588826	10421493	15934265	20029424
2814	1-(1-enyl-palmitoyl)-2-linoleoyl-GPC (P-16:0/18:2)*	Lipid	Plasmalogen	52682	LC/MS Pos Late	2300	742.574	24779386			HMDB0011211	94447312	96553376	133602592	120696264	136637360	108339712
2801	1-(1-enyl-palmitoyl)-2-linoleoyl-GPE (P-16:0/18:2)*	Lipid	Plasmalogen	52677	LC/MS Pos Late	2400	700.528	52925127			HMDB0011343	12866549	9007036	15239532	11820452	15434027	10646857
2815	1-(1-enyl-palmitoyl)-2-myristoyl-GPC (P-16:0/14:0)*	Lipid	Plasmalogen	52715	LC/MS Pos Late	2220	690.543	52923874			HMDB0011203	637919	657223	1125167	1267765	1357438	1001869
2806	1-(1-enyl-palmitoyl)-2-oleoyl-GPC (P-16:0/18:1)*	Lipid	Plasmalogen	52478	LC/MS Pos Late	2550	744.59	34779384			HMDB0007996	39495176	40882416	45881080	41813756	49391660	40585712
2800	1-(1-enyl-palmitoyl)-2-oleoyl-GPE (P-16:0/18:1)*	Lipid	Plasmalogen	52477	LC/MS Pos Late	2750	702.543	52925128			HMDB0011342	16295356	12450936	21107020	16451419	13565014	14157070
2803	1-(1-enyl-palmitoyl)-2-palmitoleoyl-GPC (P-16:0/16:1)*	Lipid	Plasmalogen	52713	LC/MS Pos Late	2218	716.559	52923882			HMDB0011207	3115859	4053415	3818643	3580017	3459662	2997610
2802	1-(1-enyl-palmitoyl)-2-palmitoyl-GPC (P-16:0/16:0)*	Lipid	Plasmalogen	52716	LC/MS Pos Late	2550	718.574	11146967			HMDB0011206	20250184	23687544	31582572	28160884	33106088	25367676
2816	1-(1-enyl-stearoyl)-2-arachidonoyl-GPC (P-18:0/20:4)	Lipid	Plasmalogen	52613	LC/MS Pos Late	2350	794.606	24779390	97802-56-7		HMDB0011253	7305804	6557446	10946300	10656206	8383598	7960351
2818	1-(1-enyl-stearoyl)-2-arachidonoyl-GPE (P-18:0/20:4)*	Lipid	Plasmalogen	52475	LC/MS Pos Late	2550	752.559	9547058			HMDB0005779	90804368	93339760	186098128	135535824	122463792	160195024
2823	1-(1-enyl-stearoyl)-2-dihomo-linolenoyl-GPE (P-18:0/20:3)*	Lipid	Plasmalogen	57343	LC/MS Pos Late	2669	754.574	52925088			HMDB0011384	5460813	5499867	10937678	8214184	10723190	11776338
2819	1-(1-enyl-stearoyl)-2-docosahexaenoyl-GPC (P-18:0/22:6)*	Lipid	Plasmalogen	52704	LC/MS Pos Late	2235	818.606	42607430			HMDB0011262	6800074	7767608	5871912	5230889	10469582	10170918
2821	1-(1-enyl-stearoyl)-2-docosahexaenoyl-GPE (P-18:0/22:6)*	Lipid	Plasmalogen	52476	LC/MS Pos Late	2401	776.559	42607458			HMDB0011394	18715660	20350874	16855780	17014266	28458276	37942688
2822	1-(1-enyl-stearoyl)-2-docosapentaenoyl-GPE (P-18:0/22:5n3)*	Lipid	Plasmalogen	57342	LC/MS Pos Late	2500	778.574	53480858			HMDB0011393	9403409	11098361	22340060	15071987	9129712	18690480
2824	1-(1-enyl-stearoyl)-2-linoleoyl-GPC (P-18:0/18:2)*	Lipid	Plasmalogen	52712	LC/MS Pos Late	2461	770.606	52923944			HMDB0011244	21685364	28105474	36216472	33376796	19423400	26746542
2810	1-(1-enyl-stearoyl)-2-linoleoyl-GPE (P-18:0/18:2)*	Lipid	Plasmalogen	52748	LC/MS Pos Late	2750	728.559				HMDB0011376	37384120	37850720	49810188	49478468	46764468	52319228
2825	1-(1-enyl-stearoyl)-2-oleoyl-GPC (P-18:0/18:1)	Lipid	Plasmalogen	52612	LC/MS Pos Late	2724	772.621	42607428	799268-63-6		HMDB0011243	3665500	4599566	4697307	4852580	4970538	4182171
2809	1-(1-enyl-stearoyl)-2-oleoyl-GPE (P-18:0/18:1)	Lipid	Plasmalogen	52614	LC/MS Pos Late	3100	730.574	42607457	144371-68-6		HMDB0011375	8578527	7714963	15048405	11182970	9986492	10416329
2794	1-palmityl-2-arachidonoyl-GPC (O-16:0/20:4)*	Lipid	Plasmalogen	52718	LC/MS Pos Late	2183	768.59	10747814			HMDB0007982	29092052	16143008	48207000	34249064	35038256	28655016
2792	1-palmityl-2-linoleoyl-GPC (O-16:0/18:2)*	Lipid	Plasmalogen	53175	LC/MS Pos Late	2200	744.59	6443157			HMDB0011151	55304744	58776464	96926800	92666968	94156920	69994016
2791	1-palmityl-2-oleoyl-GPC (O-16:0/18:1)*	Lipid	Plasmalogen	52717	LC/MS Pos Late	2456	746.606	5497103				118728408	120732880	141458288	112158808	125836944	102647840
2789	1-palmityl-2-palmitoyl-GPC (O-16:0/16:0)*	Lipid	Plasmalogen	57332	LC/MS Pos Late	2415	720.59	145911				29489264	36530404	56290340	43730520	45228968	37990704
2790	1-palmityl-2-stearoyl-GPC (O-16:0/18:0)*	Lipid	Plasmalogen	55040	LC/MS Pos Late	2548	748.621	11803170			HMDB0013405	3607390	5171319	7396365	5806526	4968897	6933996
2795	1-stearyl-2-arachidonoyl-GPC (O-18:0/20:4)*	Lipid	Plasmalogen	57333	LC/MS Pos Late	2378	796.621					24545880	18879128	39290744	25608752	30083410	23190818
2796	1-stearyl-2-docosapentaenoyl-GPC (O-18:0/22:5n3)*	Lipid	Plasmalogen	57334	LC/MS Pos Late	2358	822.637	24779340				4781756	7014189	6538547	6516358	6033749	5127514
2827	1-stearyl-2-linoleoyl-GPC (O-18:0/18:2)*	Lipid	Plasmalogen	57721	LC/MS Pos Late	2455	772.621	6443070			HMDB13418	14767342	18676976	37342244	31595024	28114048	20993520
2828	phosphatidylcholine (O-18:1/20:4, O-16:0/22:5n3)*	Lipid	Plasmalogen	57724	LC/MS Pos Late	2154	794.606					52664808	49817912	59997832	52409600	42988424	46006808
550	(N(1) + N(8))-acetylspermidine	Amino Acid	Polyamine Metabolism	57814	LC/MS Pos Early	3080	188.176	123689;496		C00612,C01029	HMDB0001276,HMDB0002189	3449788	1003315	1172432	737646	813793	936390
560	4-acetamidobutanoate	Amino Acid	Polyamine Metabolism	1558	LC/MS Pos Early	1350	146.081	18189	3025-96-5	C02946	HMDB0003681	28012796	10997083	6631470	5062980	5004274	6146308
556	5-methylthioadenosine (MTA)	Amino Acid	Polyamine Metabolism	1419	LC/MS Pos Early	2752	298.097	439176	2457-80-9	C00170	HMDB0001173	1024330	1266562	1256629	1026282	1083020	1104047
551	acisoga	Amino Acid	Polyamine Metabolism	43258	LC/MS Neg	2297	183.114	129397	106692-36-8		HMDB0061384	301096	76787	57690	48175	61009	79428
549	diacetylspermidine*	Amino Acid	Polyamine Metabolism	62105	LC/MS Pos Early	2510	230.186	132680		C03413	HMDB0002172	231374
544	N-acetyl-isoputreanine	Amino Acid	Polyamine Metabolism	62309	LC/MS Pos Early	2305	203.139	131802901				10786845	3917067	3496208	2793788	2496109	3031286
538	N-acetylputrescine	Amino Acid	Polyamine Metabolism	37496	LC/MS Pos Early	2230	131.118	122356	18233-70-0	C02714	HMDB0002064	8942441	2402322	2727122	2933588	3606090	3559893
537	putrescine	Amino Acid	Polyamine Metabolism	1408	LC/MS Pos Early	3027	89.1073	1045	110-60-1	C00134	HMDB0001414	4438580
545	spermidine	Amino Acid	Polyamine Metabolism	485	LC/MS Pos Late	700	146.165	1102	124-20-9	C00315	HMDB0001257	542131	415168	863039	89650	129675	1323257
1065	bradykinin	Peptide	Polypeptide	22154	LC/MS Pos Late	792	530.788	439201	58-82-2	C00306	HMDB0004246				175142
1068	bradykinin, des-arg(9)	Peptide	Polypeptide	34420	LC/MS Neg	4250	902.453	105044	15958-92-6	C00306	HMDB04246
1067	(Hyp-3)-Bradykinin	Peptide	Polypeptide	33962	LC/MS Pos Late	776	538.785	169947	37642-65-2		HMDB0011728				103721
1074	HWESASLLR	Peptide	Polypeptide	44657	LC/MS Neg	4053	547.774						55766
1072	HWESASXX*	Peptide	Polypeptide	57711	LC/MS Neg	3722	940.453	85328684					39847
3248	17alpha-hydroxypregnanolone glucuronide	Lipid	Pregnenolone Steroids	47403	LC/MS Neg	5071.9	509.276										52016
3247	17alpha-hydroxypregnenolone 3-sulfate	Lipid	Pregnenolone Steroids	37482	LC/MS Neg	4800	411.185	152971	28901-70-4		HMDB00416
3253	21-hydroxypregnenolone disulfate	Lipid	Pregnenolone Steroids	46115	LC/MS Neg	3935	245.067	134595	1164-98-3			321220	405257	234257	307801	316053	296750
3250	21-hydroxypregnenolone monosulfate (1)	Lipid	Pregnenolone Steroids	37174	LC/MS Neg	4624	411.185	174681	88378-34-1
3260	pregnen-diol disulfate*	Lipid	Pregnenolone Steroids	32562	LC/MS Neg	3868	238.077					8794294	13712412	5677530	8132150	6935515	6933777
3259	pregnenediol sulfate (C21H34O5S)*	Lipid	Pregnenolone Steroids	32619	LC/MS Neg	5000	397.205	105074	1247-64-9	C18044	HMDB0000774	1465868	1659826	1245095	1317235	1173097	1070998
3243	pregnenolone sulfate	Lipid	Pregnenolone Steroids	38170	LC/MS Neg	5100	395.19	105074	1247-64-9	C18044	HMDB0000774	364704	362081	214313	265119	143619	238602
3456	chenodeoxycholate	Lipid	Primary Bile Acid Metabolism	1563	LC/MS Neg	5264	391.285	10133	474-24-9;474-25-9	C02528	HMDB0000518	1.14323e+06	623298	1770149	1.87792e+06	685794	798814
3453	cholate	Lipid	Primary Bile Acid Metabolism	22842	LC/MS Neg	5165	407.28	221493	81-25-4	C00695	HMDB0000619	499634	346132	966838	774880	208958	567407
3461	glycochenodeoxycholate	Lipid	Primary Bile Acid Metabolism	32346	LC/MS Neg	5236.1	448.307	12544	16564-43-5	C05466	HMDB0000637	8558746	12217492	13237142	15084280	5433950	25237992
3474	glycochenodeoxycholate 3-sulfate	Lipid	Primary Bile Acid Metabolism	52974	LC/MS Neg	4820	263.628	11954205;21125002;21116917			HMDB0002409,HMDB0002497,HMDB0002496	939886	1234969	885635	931196	1581800	805149
3472	glycochenodeoxycholate glucuronide (1)	Lipid	Primary Bile Acid Metabolism	52983	LC/MS Neg	4806	311.666	44263370			HMDB0002579	683671	691881	480290	887815	686397	871624
3454	glycocholate	Lipid	Primary Bile Acid Metabolism	18476	LC/MS Neg	5163	464.302	10140	475-31-0;863-57-0	C01921	HMDB0000138	3548614	3539764	1870926	2189600	1190600	8149466
3466	tauro-beta-muricholate	Lipid	Primary Bile Acid Metabolism	33983	LC/MS Neg	4774	514.284	121596216;168408;21124703	25696-60-0		HMDB0000932	116149	282434	212430	405549	399478	500268
3462	taurochenodeoxycholate	Lipid	Primary Bile Acid Metabolism	18494	LC/MS Neg	5250	498.289	387316	6009-98-9	C05465	HMDB0000951	1162780	2146828	2.45872e+06	3954896	2370439	4761052
3455	taurocholate	Lipid	Primary Bile Acid Metabolism	18497	LC/MS Neg	5150	514.284	46783527;6675	145-42-6	C05122	HMDB0000036	710731	831245	779281	690390	669997	1461793
3280	5alpha-pregnan-3beta,20alpha-diol disulfate	Lipid	Progestin Steroids	37198	LC/MS Neg	3962	239.085	118703093			HMDB0094650	316668	521951	157188	410774	509802	493087
3274	5alpha-pregnan-3beta,20alpha-diol monosulfate (2)	Lipid	Progestin Steroids	37200	LC/MS Neg	5060	399.221
3271	5alpha-pregnan-3beta,20beta-diol monosulfate (1)	Lipid	Progestin Steroids	37196	LC/MS Neg	5180	399.221				HMDB0240580
3270	5alpha-pregnan-3beta-ol,20-one sulfate	Lipid	Progestin Steroids	37480	LC/MS Neg	5136	397.205		7730-00-9
3281	5alpha-pregnan-diol disulfate	Lipid	Progestin Steroids	46172	LC/MS Neg	4310	239.085	3082277;5127902			HMDB0240582,HMDB0240581		73083
3283	pregnanediol-3-glucuronide	Lipid	Progestin Steroids	40708	LC/MS Neg	5145	495.296	123796	1852-49-9		HMDB0010318	51112	153575		107017	106525	168259
3288	pregnanolone/allopregnanolone sulfate	Lipid	Progestin Steroids	48394	LC/MS Neg	5160	397.205	31402;129699967		C05480	HMDB0240591,HMDB0062782
4132	allantoin	Nucleotide	Purine Metabolism, (Hypo)Xanthine/Inosine containing	1107	LC/MS Polar	1672	157.037	204;439714;439713	97-59-6	C02350,C02348,C01551	HMDB0000462	5055670	5984067	6151387	6646411	7484311	6884264
4119	hypoxanthine	Nucleotide	Purine Metabolism, (Hypo)Xanthine/Inosine containing	3127	LC/MS Neg	1291.2	135.031	790;135398638	68-94-0	C00262	HMDB0000157	828077	787467	1568923	888213	850846	2796636
4118	inosine	Nucleotide	Purine Metabolism, (Hypo)Xanthine/Inosine containing	1123	LC/MS Neg	1602.1	267.074	6021	58-63-9	C00294	HMDB0000195	86408	67444	167605		70504	316120
4117	inosine 5'-monophosphate (IMP)	Nucleotide	Purine Metabolism, (Hypo)Xanthine/Inosine containing	2133	LC/MS Pos Early	650	349.054	8582	4691-65-0	C00130	HMDB0000175						1835466
4125	N1-methylinosine	Nucleotide	Purine Metabolism, (Hypo)Xanthine/Inosine containing	48351	LC/MS Pos Early	1430	283.104	650095	20245-33-4		HMDB0002721	529149	512885	488771	478490	413302	436567
4130	urate	Nucleotide	Purine Metabolism, (Hypo)Xanthine/Inosine containing	1604	LC/MS Neg	757.1	167.021	1175	69-93-2;120K5305	C00366	HMDB0000289	188429248	246239168	196334336	186861264	205351760	214361328
4120	xanthine	Nucleotide	Purine Metabolism, (Hypo)Xanthine/Inosine containing	3147	LC/MS Polar	2023	151.026	1188	69-89-6	C00385	HMDB0000292	1536895	1444906	1824182	1307910	1235339	1678253
4146	adenine	Nucleotide	Purine Metabolism, Adenine containing	554	LC/MS Pos Early	2221	136.062	190	73-24-5	C00147	HMDB0000034	422456	497211	532061	377034	372022	519547
4137	ADP	Nucleotide	Purine Metabolism, Adenine containing	3108	LC/MS Neg	680	426.022	6022	20398-34-9	C00008	HMDB0001341	123310		580538			602150
4138	AMP	Nucleotide	Purine Metabolism, Adenine containing	32342	LC/MS Pos Early	1013	348.07	6083	149022-20-8	C00020	HMDB0000045	549495	1033163	2748844	266844	353297	2919362
4152	1-methyladenosine	Nucleotide	Purine Metabolism, Adenine containing	15650	LC/MS Pos Early	2120	282.12	27476	15763-06-1	C02494	HMDB0003331	2398475	2676097	2637427	2171298	2664850	3168859
4163	N6-carbamoylthreonyladenosine	Nucleotide	Purine Metabolism, Adenine containing	35157	LC/MS Neg	2164	411.127	161466	24719-82-2		HMDB0041623	93833	115396	99811	93452	89782	108489
4153	N6-methyladenosine	Nucleotide	Purine Metabolism, Adenine containing	37114	LC/MS Pos Early	2264	282.12	102175	1867-73-8		HMDB0004044
4173	N6-succinyladenosine	Nucleotide	Purine Metabolism, Adenine containing	48130	LC/MS Neg	940	382.1	165243	4542-23-8		HMDB0000912	97060		102883	60852	101540	64613
4185	7-methylguanine	Nucleotide	Purine Metabolism, Guanine containing	35114	LC/MS Pos Early	2175	166.072	135398679	578-76-7	C02242	HMDB0000897	2259442	2296339	2158875	2051775	2393157	2059734
4181	guanosine	Nucleotide	Purine Metabolism, Guanine containing	1573	LC/MS Neg	1662	282.084	6802	118-00-3	C00387	HMDB0000133						94831
4177	guanosine 3'-monophosphate (3'-GMP)	Nucleotide	Purine Metabolism, Guanine containing	39786	LC/MS Neg	773.9	362.051	135398727	117-68-0
4191	N2,N2-dimethylguanosine	Nucleotide	Purine Metabolism, Guanine containing	35137	LC/MS Pos Early	2210	312.13	135501639	2140-67-2		HMDB0004824	436113	420079	451835	431493	426000	437062
4263	2'-O-methylcytidine	Nucleotide	Pyrimidine Metabolism, Cytidine containing	57554	LC/MS Pos Early	2411	258.108	150971	2140-72-9					318336	690992	1092260	914272
4253	3-methylcytidine	Nucleotide	Pyrimidine Metabolism, Cytidine containing	35132	LC/MS Pos Early	2176	258.108	14237477	21028-20-6		HMDB0240577					292541	359415
4250	cytidine	Nucleotide	Pyrimidine Metabolism, Cytidine containing	514	LC/MS Pos Early	2124	244.093	6175	65-46-3	C00475	HMDB0000089	81626	144646	167910	172803	182709	339825
4246	CMP	Nucleotide	Pyrimidine Metabolism, Cytidine containing	2372	LC/MS Pos Early	835	324.059	6131	63-37-6	C00055	HMDB0000095
4255	N4-acetylcytidine	Nucleotide	Pyrimidine Metabolism, Cytidine containing	35130	LC/MS Pos Early	1580	286.103	107461	3768-18-1		HMDB0005923	352564	589573	181731	293270	238878	387156
4205	dihydroorotate	Nucleotide	Pyrimidine Metabolism, Orotate containing	601	LC/MS Polar	1910	157.025	648	155-54-4	C00337	HMDB03349	79420	62404		472849	553520	607968
4206	orotate	Nucleotide	Pyrimidine Metabolism, Orotate containing	1505	LC/MS Polar	1638.1	155.01	967	50887-69-9	C00295	HMDB0000226	1942545	2182207	1864052	1168327	1164639	1132955
4208	orotidine	Nucleotide	Pyrimidine Metabolism, Orotate containing	35172	LC/MS Polar	2250	287.052	92751	314-50-1		HMDB0000788	332266	325587	278076	253383	242675	305344
4282	3-aminoisobutyrate	Nucleotide	Pyrimidine Metabolism, Thymine containing	1566	LC/MS Pos Early	2190	104.071	64956	10569-72-9;214139-20-5	C05145	HMDB0002166	9070545	9713982	8813449	7660858	13137210	8934299
4279	5,6-dihydrothymine	Nucleotide	Pyrimidine Metabolism, Thymine containing	1418	LC/MS Neg	1637.8	127.051	93556	696-04-8	C00906	HMDB0000079	152556	179322	174176	206341	148144	162670
4273	thymidine	Nucleotide	Pyrimidine Metabolism, Thymine containing	2183	LC/MS Neg	1963.7	241.083	5789	50-89-5	C00214	HMDB0000273				38397	39878	37721
4276	thymine	Nucleotide	Pyrimidine Metabolism, Thymine containing	604	LC/MS Neg	1654	125.036	1135	65-71-4	C00178	HMDB0000262
4234	2'-deoxyuridine	Nucleotide	Pyrimidine Metabolism, Uracil containing	1412	LC/MS Neg	1586	111.02	13712	951-78-0	C00526	HMDB0000012	269755	326068	247639	305968	316261	260006
4222	2'-O-methyluridine	Nucleotide	Pyrimidine Metabolism, Uracil containing	57655	LC/MS Neg	1831	257.078	102212	2140-76-3			274128	180040	186568	122229	101739	86366
4237	3-ureidopropionate	Nucleotide	Pyrimidine Metabolism, Uracil containing	3155	LC/MS Pos Early	875	133.061	111	462-88-4	C02642	HMDB0000026	289983	146308	236970			259347
4223	5-methyluridine (ribothymidine)	Nucleotide	Pyrimidine Metabolism, Uracil containing	35136	LC/MS Neg	1778.1	257.078	445408	1463-10-1		HMDB0000884	1277327	1588508	769433	1328952	1764746	1631512
4238	beta-alanine	Nucleotide	Pyrimidine Metabolism, Uracil containing	55	LC/MS Pos Early	1905	90.055	239	56-41-7;107-95-9	C00099	HMDB0000056	2995768	3831627	4202723	3865803	5003976	3796451
4240	N-acetyl-beta-alanine	Nucleotide	Pyrimidine Metabolism, Uracil containing	37432	LC/MS Neg	773	130.051	76406	3025-95-4	C01073	HMDB0061880	1024075	955987	510277	723935	669470	652011
4220	pseudouridine	Nucleotide	Pyrimidine Metabolism, Uracil containing	33442	LC/MS Neg	1100	243.062	15047	1445-07-4	C02067	HMDB0000767	12184088	13129689	11694660	10966805	12509017	12682303
4219	uracil	Nucleotide	Pyrimidine Metabolism, Uracil containing	605	LC/MS Neg	1086	111.02	1174	66-22-8	C00106	HMDB0000300			130185
4218	uridine	Nucleotide	Pyrimidine Metabolism, Uracil containing	606	LC/MS Neg	1457.6	243.062	6029	58-96-8	C00299	HMDB0000296	14991618	13957544	17007760	19783856	14629881	18183606
4332	FAD	Cofactors and Vitamins	Riboflavin Metabolism	2134	LC/MS Neg	2425	784.15	643975	146-14-5;84366-81-4	C00016	HMDB0001248	45725	33116	40972	27212	44143	75305
3538	3b-hydroxy-5-cholenoic acid	Lipid	Secondary Bile Acid Metabolism	43507	LC/MS Neg	5205	373.275	92997	5255-17-4		HMDB0000308		52020
3478	deoxycholate	Lipid	Secondary Bile Acid Metabolism	1114	LC/MS Neg	5294	391.285	222528;440355	83-44-3	C04483	HMDB0000626	10013752	6.49788e+06	8605503	10670567	3634838	9882617
3534	glycocholenate sulfate*	Lipid	Secondary Bile Acid Metabolism	57741	LC/MS Neg	4750	510.253					719724	800324	431251	786146	996020	931719
3486	glycodeoxycholate	Lipid	Secondary Bile Acid Metabolism	18477	LC/MS Neg	5281	448.307	3035026	360-65-6	C05464	HMDB00631	11200193	10665669	6761607	11735919	4.98749e+06	39806932
3539	glycodeoxycholate 3-sulfate	Lipid	Secondary Bile Acid Metabolism	52975	LC/MS Neg	4875	263.628	101602538				2715093	3482093	1226164	2399198	2796233	2147174
3525	glycohyocholate	Lipid	Secondary Bile Acid Metabolism	42574	LC/MS Neg	5020	464.302	71361462			HMDB0000138	237025	264301	666285	848086	237050	388678
3498	glycolithocholate	Lipid	Secondary Bile Acid Metabolism	31912	LC/MS Neg	5357.1	432.312	115245	474-74-8	C15557	HMDB00698		148037		86426		693836
3499	glycolithocholate sulfate*	Lipid	Secondary Bile Acid Metabolism	32620	LC/MS Neg	5011	255.631	72222	15324-64-8	C11301	HMDB0002639	4042732	6620707	703145	4331983	4757874	10495405
3513	glycoursodeoxycholate	Lipid	Secondary Bile Acid Metabolism	39379	LC/MS Neg	5033	448.307	12310288	64480-66-6		HMDB0000708	9049895	6224500	5708825	16483564	1825104	8819347
3524	hyocholate	Lipid	Secondary Bile Acid Metabolism	34093	LC/MS Neg	5046	407.28	92805	547-75-1	C17649	HMDB0000760	119520		927809	423544	141149	104896
3508	isoursodeoxycholate	Lipid	Secondary Bile Acid Metabolism	57577	LC/MS Neg	4809	391.285	127601	78919-26-3	C17662	HMDB0000686	8263862	904133	7969855	6954741	2076913	1711295
3535	taurocholenate sulfate*	Lipid	Secondary Bile Acid Metabolism	32807	LC/MS Neg	4750	279.614					688046	2137661	887701	1289239	2641206	1106169
3488	taurodeoxycholate	Lipid	Secondary Bile Acid Metabolism	12261	LC/MS Neg	5257.4	498.289	2733768	207737-97-1	C05463	HMDB0000896	2271466	3240073	3.17747e+06	3951219	3750614	8467283
3501	taurolithocholate 3-sulfate	Lipid	Secondary Bile Acid Metabolism	36850	LC/MS Neg	5027	280.622	440071	64936-83-0	C03642	HMDB0002580	1112844	4540603	429664	2175210	4269674	3489365
3517	tauroursodeoxycholate	Lipid	Secondary Bile Acid Metabolism	39378	LC/MS Neg	5025	498.289	9848818	14605-22-2		HMDB0000874	345006	308005	348341	1007118	237718	561380
3503	ursodeoxycholate	Lipid	Secondary Bile Acid Metabolism	1605	LC/MS Neg	5055	391.285	31401	128-13-2	C07880	HMDB0000946	2119735	619243	4359618	2911490	813308	722639
3000	sphinganine	Lipid	Sphingolipid Synthesis	17769	LC/MS Pos Late	1413	302.305	3126	3102-56-5	C00836	HMDB0000269	643459	994225	640504	588823	465694	484920
3001	sphinganine-1-phosphate	Lipid	Sphingolipid Synthesis	52605	LC/MS Pos Late	1431	382.272	520	19794-97-9		HMDB0001383	190165	249155	483575	160606	105326	749157
3106	behenoyl sphingomyelin (d18:1/22:0)*	Lipid	Sphingomyelins	48492	LC/MS Pos Late	3250	787.669	44260125			HMDB0012103	556600640	591105536	684912128	661870848	673184768	714680192
3108	lignoceroyl sphingomyelin (d18:1/24:0)	Lipid	Sphingomyelins	57330	LC/MS Pos Late	3437	815.7		60037-60-7			322729376	351156192	391858944	376108576	437361536	479277184
3103	palmitoyl sphingomyelin (d18:1/16:0)	Lipid	Sphingomyelins	37506	LC/MS Pos Late	2168	703.575	9939941	6254-89-3		HMDB0010169	856337600	991752512	983061440	989230912	971766464	995483136
3115	sphingomyelin (d17:1/16:0, d18:1/15:0, d16:1/17:0)*	Lipid	Sphingomyelins	52433	LC/MS Pos Late	2082	689.559		121999-58-4			97757472	104701440	140389888	131418896	128691032	116156840
3116	sphingomyelin (d17:2/16:0, d18:2/15:0)*	Lipid	Sphingomyelins	57483	LC/MS Pos Late	1875	687.544					1416368	1599220	1709487	2067177	1971649	1593256
3113	sphingomyelin (d18:1/14:0, d16:1/16:0)*	Lipid	Sphingomyelins	42463	LC/MS Pos Late	1998	675.544	11433862			HMDB0012097	205242848	241630336	304110464	305173248	311082464	292425376
3118	sphingomyelin (d18:1/17:0, d17:1/18:0, d19:1/16:0)	Lipid	Sphingomyelins	52615	LC/MS Pos Late	2350	717.591	46891763	121999-64-2			40501068	47586672	49919496	48566976	49493568	44613772
3119	sphingomyelin (d18:1/18:1, d18:2/18:0)	Lipid	Sphingomyelins	37529	LC/MS Pos Late	2167	729.591	6443882	108392-10-5		HMDB0012101	59017276	69533912	60685164	64449008	55497428	57876440
3120	sphingomyelin (d18:1/19:0, d19:1/18:0)*	Lipid	Sphingomyelins	57475	LC/MS Pos Late	2550	745.622					24809148	26519858	30215140	28335812	27298564	26666000
3121	sphingomyelin (d18:1/20:0, d16:1/22:0)*	Lipid	Sphingomyelins	48490	LC/MS Pos Late	2800	759.638	44260124			HMDB0012102	376184960	332504416	429479776	332870272	423604000	347700928
3122	sphingomyelin (d18:1/20:1, d18:2/20:0)*	Lipid	Sphingomyelins	48491	LC/MS Pos Late	2450	757.622		222403-67-0			39119248	39522844	32096924	33949576	35125656	34770480
3123	sphingomyelin (d18:1/20:2, d18:2/20:1, d16:1/22:2)*	Lipid	Sphingomyelins	57481	LC/MS Pos Late	2200	755.606					3618085	4058943	3630787	3601097	3617969	3707050
3124	sphingomyelin (d18:1/21:0, d17:1/22:0, d16:1/23:0)*	Lipid	Sphingomyelins	52495	LC/MS Pos Late	3000	773.653					126158304	123924288	186574032	129928400	176481536	136499584
3126	sphingomyelin (d18:1/22:1, d18:2/22:0, d16:1/24:1)*	Lipid	Sphingomyelins	48493	LC/MS Pos Late	2775	785.653				HMDB0012104	290911392	262310960	287755776	232306608	272654528	212780304
3127	sphingomyelin (d18:1/22:2, d18:2/22:1, d16:1/24:2)*	Lipid	Sphingomyelins	57477	LC/MS Pos Late	2350	783.638					25210574	25346120	24658012	27076076	30807168	29221028
3129	sphingomyelin (d18:1/24:1, d18:2/24:0)*	Lipid	Sphingomyelins	47153	LC/MS Pos Late	3200	813.684	44260126	94359-13-4		HMDB0012107	1363622144	1422501376	1379586944	1265898496	1442197760	1405902336
3131	sphingomyelin (d18:1/25:0, d19:0/24:1, d20:1/23:0, d19:1/24:0)*	Lipid	Sphingomyelins	57478	LC/MS Pos Late	3500	829.716					5235088	5919433	6309606	8495818	6086623	7079881
3114	sphingomyelin (d18:2/14:0, d18:1/14:1)*	Lipid	Sphingomyelins	47154	LC/MS Pos Late	1860	673.528					8482434	9276148	13796383	13056158	15710087	14570520
3117	sphingomyelin (d18:2/16:0, d18:1/16:1)*	Lipid	Sphingomyelins	42459	LC/MS Pos Late	2002	701.559					219851568	265981376	247188320	255736400	253854416	235031696
3109	sphingomyelin (d18:2/18:1)*	Lipid	Sphingomyelins	57474	LC/MS Pos Late	2025	727.575	52931155			HMDB0001348	12328967	13805872	11630288	12276215	11504233	10279089
3125	sphingomyelin (d18:2/21:0, d16:2/23:0)*	Lipid	Sphingomyelins	57480	LC/MS Pos Late	2500	771.638					12215305	12614959	13408853	12928749	12391291	10948694
3128	sphingomyelin (d18:2/23:0, d18:1/23:1, d17:1/24:1)*	Lipid	Sphingomyelins	52435	LC/MS Pos Late	3000	799.669	134757653				230355456	221885232	265783056	204635664	248092720	193034320
3110	sphingomyelin (d18:2/23:1)*	Lipid	Sphingomyelins	57482	LC/MS Pos Late	2500	797.653					17862976	18494062	19166376	18186748	19921286	17040492
3130	sphingomyelin (d18:2/24:1, d18:1/24:2)*	Lipid	Sphingomyelins	52437	LC/MS Pos Late	2750	811.669	85336023				572431616	570749568	538709760	488573920	568241408	539229312
3111	sphingomyelin (d18:2/24:2)*	Lipid	Sphingomyelins	57479	LC/MS Pos Late	2400	809.653					30656108	32697472	30214200	31686632	40108772	35478588
3105	stearoyl sphingomyelin (d18:1/18:0)	Lipid	Sphingomyelins	19503	LC/MS Pos Late	2450	731.606	6453725	85187-10-6;85187-10-6	C00550	HMDB0001348	127335304	137341520	135436320	141406784	143534944	150693632
3107	tricosanoyl sphingomyelin (d18:1/23:0)*	Lipid	Sphingomyelins	52436	LC/MS Pos Late	3350	801.684				HMDB0012105	222931536	234841712	264755264	263627232	279790656	282393248
3167	hexadecasphingosine (d16:1)*	Lipid	Sphingosines	57428	LC/MS Pos Late	1289	272.258	14767871				246483	249608	346481	255014	153729	611588
3159	sphingosine	Lipid	Sphingosines	17747	LC/MS Pos Late	1393	300.29	5280335	123-78-4	C00319	HMDB0000252	1629358	1869956	1645555	614948	773410	1279760
3161	sphingosine 1-phosphate	Lipid	Sphingosines	34445	LC/MS Pos Late	1375	380.256	5283560	26993-30-6	C06124	HMDB0000277	1360264	2171099	3535057	1267227	1328174	4485964
3209	3beta-hydroxy-5-cholestenoate	Lipid	Sterol	54805	LC/MS Neg	5398	415.322	165511	6561-58-6	C17333		1015896	1194119	1348563	1168764	979384	624389
3219	4-cholesten-3-one	Lipid	Sterol	38125	LC/MS Pos Late	2520	385.346	91477	601-57-0	C00599	HMDB0000921	861309	1152496	758296	889215	728819	704802
3206	7-HOCA	Lipid	Sterol	36776	LC/MS Neg	5288.1	429.301	3081085	115538-85-7	C17337	HMDB0012458	3853339	2803122	2538988	2355229	2143779	2038357
3195	7-dehydrocholesterol	Lipid	Sterol	1099	LC/MS Pos Late	2467	367.336	439423	434-16-2	C01164	HMDB0000032
3241	7-hydroxycholesterol (alpha or beta)	Lipid	Sterol	47890	LC/MS Pos Late	1930	367.336	15571093		C15610	HMDB0006119				64108
3221	beta-sitosterol	Lipid	Sterol	27414	LC/MS Pos Late	3054	397.383	222284	83-46-5	C01753	HMDB0000852						94251
3224	campesterol	Lipid	Sterol	33997	LC/MS Pos Late	2873	383.367	173183	474-62-4	C01789	HMDB0002869	345219	208460		243825
3192	cholesterol	Lipid	Sterol	63	LC/MS Pos Late	2707	369.352	6432564;11025495;5997	57-88-5	C00187	HMDB0000067	166862528	186088736	169973072	165439888	190962640	214160432
PATHWAY_SORTORDER	BIOCHEMICAL	SUPER_PATHWAY	SUB_PATHWAY	COMP_ID	PLATFORM	RI	MASS	PUBCHEM	CAS	KEGG	Group HMDB	DEVO-00001	DEVO-00002	DEVO-00003	DEVO-00004	DEVO-00005	DEVO-00006
1458	2-methylcitrate	Energy	TCA Cycle	37483	LC/MS Neg	575	205.035	12898022	6061-96-7	C02225	HMDB0000379	623975	914200	1453133	1135562
1441	aconitate [cis or trans]	Energy	TCA Cycle	46173	LC/MS Neg	580	173.009	643757;444212		C02341,C004174	HMDB0000958,HMDB000072	27215512	52438348	45994752	35929640	38881236	36699020
1445	alpha-ketoglutarate	Energy	TCA Cycle	528	LC/MS Polar	2700	145.014	51	305-72-6;328-50-7;22202-68-2	C00026	HMDB0000208	25897220	31795144	28169062	30654626	39868648	36625192
1439	citrate	Energy	TCA Cycle	1564	LC/MS Neg	582	191.02	311	77-92-9	C00158	HMDB0000094	656050176	711891968	652229760	744661632	670435328	746008768
1449	fumarate	Energy	TCA Cycle	1643	LC/MS Polar	3084	115.004	444972	100-17-8	C00122	HMDB0000134	2309511	2365918	2018839	2077419	2750730	2147752
1451	malate	Energy	TCA Cycle	1303	LC/MS Neg	615.6	133.014	525	6915-15-7	C00497,C00149,C00711	HMDB0000744,HMDB0031518,HMDB0000156	15888487	22139144	21815244	20021356	27040368	20295350
1448	succinate	Energy	TCA Cycle	1437	LC/MS Polar	3149	117.019	1110	110-15-6	C00042	HMDB0000254	18750900	20485964	19327862	15775999	12527473	16982052
1447	succinylcarnitine (C4-DC)	Energy	TCA Cycle	37058	LC/MS Pos Early	2291	262.128	71464481	256928-74-2		HMDB0061717	441155	347609	622587	566919	333021	637231
4613	3-hydroxycotinine glucuronide	Xenobiotics	Tobacco Metabolite	43470	LC/MS Neg	1745	367.115	53477725	132929-88-5		HMDB0001204
4609	cotinine	Xenobiotics	Tobacco Metabolite	553	LC/MS Pos Early	2213	177.102	408	486-56-6		HMDB0001046
4611	cotinine N-oxide	Xenobiotics	Tobacco Metabolite	38662	LC/MS Pos Early	1377	193.097	9815514	36508-80-2		HMDB0001411
4610	hydroxycotinine	Xenobiotics	Tobacco Metabolite	38661	LC/MS Pos Early	2030	193.097	107963	34834-67-8		HMDB0001390
4370	alpha-CEHC sulfate	Cofactors and Vitamins	Tocopherol Metabolism	47666	LC/MS Neg	3090	357.101					555231	662682	432670	805377	368712	442018
4359	alpha-tocopherol	Cofactors and Vitamins	Tocopherol Metabolism	1561	LC/MS Pos Late	2522	430.378	86472	59-02-9;10191-41-0	C02477	HMDB0001893	328425728	551572032	381019936	487895040	396753856	517559168
4363	delta-tocopherol	Cofactors and Vitamins	Tocopherol Metabolism	33418	LC/MS Pos Late	2259	402.349	92094	119-13-1	C14151	HMDB0002902	210070	865972	257840	605526	359850	578718
4367	gamma-CEHC	Cofactors and Vitamins	Tocopherol Metabolism	44876	LC/MS Neg	3843	263.129	133098	178167-75-4		HMDB0001931	1360864	1065215	1580247	1510996	1500601	1699828
4368	gamma-CEHC glucuronide*	Cofactors and Vitamins	Tocopherol Metabolism	42381	LC/MS Neg	2500	439.161	121596235				58759	47651	115317	95412	81298	90050
4381	gamma-tocopherol/beta-tocopherol	Cofactors and Vitamins	Tocopherol Metabolism	52473	LC/MS Pos Late	2384	416.364			C14152,C02483	HMDB0006335,HMDB0001492	1104661	4579865	1120508	3223061	1829328	3993390
322	3-indoxyl sulfate	Amino Acid	Tryptophan Metabolism	27672	LC/MS Neg	2222.2	212.002	10258	2642-37-7		HMDB0000682	79763712	93991440	99676592	55259256	64768208	72029048
290	5-hydroxyindoleacetate	Amino Acid	Tryptophan Metabolism	437	LC/MS Neg	1510.2	190.051	1826	54-16-0	C05635	HMDB0000763	97483	39163	85037	54940	65017	65390
327	6-bromotryptophan	Amino Acid	Tryptophan Metabolism	62503	LC/MS Neg	3565	280.993	9856996				539594	668417	669403	642671	704799	636698
261	C-glycosyltryptophan	Amino Acid	Tryptophan Metabolism	48782	LC/MS Pos Early	2700	367.15	10981970	180509-18-6		HMDB0240296	725167	874182	756716	688502	716709	768585
316	indole-3-carboxylate	Amino Acid	Tryptophan Metabolism	38116	LC/MS Neg	1710	160.04	69867	771-50-6	C19837	HMDB0003320	58292	60049	76427		40608	95720
299	indoleacetate	Amino Acid	Tryptophan Metabolism	27513	LC/MS Neg	2200	174.056	802	6505-45-9	C00954	HMDB0000197	4239386	4030733	3778030	3368764	3035589	3252139
307	indoleacetylglutamine	Amino Acid	Tryptophan Metabolism	42087	LC/MS Neg	2535	302.115	25200879			HMDB0013240	70522	52065	135561	115130	63238	107445
298	indolelactate	Amino Acid	Tryptophan Metabolism	18349	LC/MS Neg	2286	204.067	92904	832-97-3	C02043	HMDB0000671	6801024	8852225	10604489	9042573	6949556	6712544
305	indolepropionate	Amino Acid	Tryptophan Metabolism	32405	LC/MS Neg	2795	188.072	3744	830-96-6		HMDB0002302	2580352	762597	4808457	1657833	1295267	1170431
272	kynurenate	Amino Acid	Tryptophan Metabolism	1417	LC/MS Neg	2224	188.035	3845	492-27-3	C01717	HMDB0000715	596814	750391	971962	762951	657573	633269
267	kynurenine	Amino Acid	Tryptophan Metabolism	15140	LC/MS Pos Early	2739	209.092	161166	2922-83-0	C00328	HMDB0000684	17605952	16607663	19427408	16206229	11609783	14332866
270	N-acetylkynurenine (2)	Amino Acid	Tryptophan Metabolism	48757	LC/MS Pos Early	2364	251.103	73817779						78044
255	N-acetyltryptophan	Amino Acid	Tryptophan Metabolism	33959	LC/MS Neg	2630	245.093	439917;700653	1218-34-4	C03137	HMDB0013713	395932	610710	372012	606912	531655	625572
274	N-formylanthranilic acid	Amino Acid	Tryptophan Metabolism	43549	LC/MS Polar	900	164.035	101399	3342-77-6	C05653	HMDB0004089	265457	466076	291124	362952	330097	328670
282	picolinate	Amino Acid	Tryptophan Metabolism	1512	LC/MS Pos Early	910	124.039	1018	98-98-6	C10164	HMDB0002243	1965397	1106122	587430	466639	981354	490400
287	serotonin	Amino Acid	Tryptophan Metabolism	2342	LC/MS Pos Early	2550	177.102	5202	153-98-0	C00780	HMDB0000259	931102	1622629	5793586	321587	455990	14722431
254	tryptophan	Amino Acid	Tryptophan Metabolism	54	LC/MS Pos Early	2986	205.097	6305	73-22-3	C00078	HMDB0000929	499217984	508142304	597867264	546271104	450334528	514799968
264	tryptophan betaine	Amino Acid	Tryptophan Metabolism	37097	LC/MS Pos Early	2673	247.144	442106	20671-76-5	C09213	HMDB0061115	4225129	4652090	835357	716971	206166	249034
278	xanthurenate	Amino Acid	Tryptophan Metabolism	15679	LC/MS Pos Early	2236	206.045	5699	59-007	C02470	HMDB0000881	42071	82830	166752	124238	154599
181	3-(4-hydroxyphenyl)lactate (HPLA)	Amino Acid	Tyrosine Metabolism	32197	LC/MS Neg	1379	181.051	9378	6482-98-0	C03672	HMDB0000755	9342232	10185515	7089538	8991119	9423407	8480428
206	3-methoxytyramine sulfate	Amino Acid	Tyrosine Metabolism	44618	LC/MS Neg	1722	246.044	54133459				81710	96626	89471	88217	139670	98693
204	3-methoxytyrosine	Amino Acid	Tyrosine Metabolism	12017	LC/MS Pos Early	2555	212.092	9307	300-48-1		HMDB0001434	844827	842590	676453	622989	821864	857366
175	4-hydroxyphenylpyruvate	Amino Acid	Tyrosine Metabolism	1669	LC/MS Neg	1690	179.035	979	156-39-8	C01179	HMDB0000707	630213	183776	169640	299436	1184968	792106
224	dopamine 3-O-sulfate	Amino Acid	Tyrosine Metabolism	48407	LC/MS Neg	1556.2	232.029	122136		C13690	HMDB0006275	2912336	4593109	2025667	1844007	3404505	2419783
223	dopamine 4-sulfate	Amino Acid	Tyrosine Metabolism	48406	LC/MS Neg	1511	232.029	68517194		C13691	HMDB0004148	46642	298946	139978		341935	174005
219	gentisate	Amino Acid	Tyrosine Metabolism	18280	LC/MS Polar	905	153.019	3469	490-79-9	C00628	HMDB0000152	310468	275911	174510	148459	304543	142658
163	N-acetyltyrosine	Amino Acid	Tyrosine Metabolism	32390	LC/MS Neg	1680	222.077	68310	537-55-3		HMDB0000866	170339	130328	158534	154711	144125	162231
227	N-formylphenylalanine	Amino Acid	Tyrosine Metabolism	48433	LC/MS Neg	2360	192.067	7064571;759256	13200-85-6		HMDB0240317	148891	300677	129563	194252	244184	296204
225	p-cresol glucuronide*	Amino Acid	Tyrosine Metabolism	48841	LC/MS Neg	2420	283.082	154035	17680-99-8		HMDB0011686	1513104	2365902	1217795	983585	773204	2417878
190	phenol sulfate	Amino Acid	Tyrosine Metabolism	32553	LC/MS Neg	2156	172.991	74426	937-34-8	C02180	HMDB0060015	26182252	41780032	51987616	42873808	50899804	56895888
245	thyroxine	Amino Acid	Tyrosine Metabolism	2761	LC/MS Neg	4808	775.679	5819	51-48-9	C01829	HMDB0000248	517509	519122	445019	427365	407099	409071
226	tyramine O-sulfate	Amino Acid	Tyrosine Metabolism	48408	LC/MS Neg	1565	216.034	153005	30223-92-8		HMDB0006409	378369	387208	541816	540039	492263	847749
162	tyrosine	Amino Acid	Tyrosine Metabolism	1299	LC/MS Pos Early	2430	182.081	6057	60-18-4	C00082	HMDB0000158	418241120	328113792	319302816	416827776	558733632	459827872
201	vanillactate	Amino Acid	Tyrosine Metabolism	54910	LC/MS Neg	1625	211.061	160637	2475-56-1		HMDB0000913	59497	122925	103705	98553	94475	78460
228	vanillic alcohol sulfate	Amino Acid	Tyrosine Metabolism	48733	LC/MS Neg	1808	233.012		754920-02-0		HMDB0041788	2163817	7558883	3536756	3411287	7554462	11414198
202	vanillylmandelate (VMA)	Amino Acid	Tyrosine Metabolism	1567	LC/MS Neg	941	197.046	1245	55-10-7	C05584	HMDB0000291	719586	727020	576176	545825	658930	518997
491	2-oxoarginine*	Amino Acid	Urea cycle; Arginine and Proline Metabolism	55072	LC/MS Pos Early	1760	174.087	558	3715-10-04	C03771	HMDB0004225	1373986	2281317	3086940	2332924	2257828	1884405
522	argininate*	Amino Acid	Urea cycle; Arginine and Proline Metabolism	57461	LC/MS Pos Early	2150	176.103	160437	157-07-3		HMDB0003148	571076	608590	1156905	852160	712373	597247
483	arginine	Amino Acid	Urea cycle; Arginine and Proline Metabolism	1638	LC/MS Pos Early	2825	175.119	6322	1119-34-2	C00062	HMDB0000517	525295200	430211200	567392064	527641408	647691840	757751040
484	argininosuccinate	Amino Acid	Urea cycle; Arginine and Proline Metabolism	15497	LC/MS Pos Early	2745	291.13	60150382	156637-58-0	C03406	HMDB0000052
492	citrulline	Amino Acid	Urea cycle; Arginine and Proline Metabolism	2132	LC/MS Pos Early	1520	176.103	9750	372-75-8	C00327	HMDB0000904	150580192	125796856	172508224	169791808	161919920	115060424
498	dimethylarginine (ADMA + SDMA)	Amino Acid	Urea cycle; Arginine and Proline Metabolism	36808	LC/MS Pos Early	2850	203.15	123831;169148	102783-24-4	C21189,C03626	HMDB0003334,HMDB0001539	41721476	45447060	42847984	39571880	45304236	50011056
493	homoarginine	Amino Acid	Urea cycle; Arginine and Proline Metabolism	22137	LC/MS Pos Early	2882	189.135	9085	156-86-5	C01924	HMDB0000670	9653515	8285840	16669982	21338192	29505878	25668540
494	homocitrulline	Amino Acid	Urea cycle; Arginine and Proline Metabolism	22138	LC/MS Neg	789	188.104	65072	1190-49-4	C02427	HMDB0000679	799885	1177391	1060263	1010995	1023034	688277
519	N,N,N-trimethyl-alanylproline betaine (TMAP)	Amino Acid	Urea cycle; Arginine and Proline Metabolism	62947	LC/MS Pos Early	2470	229.155				HMDB0240365	14079438	15363046	10380454	11399179	11336194	12837925
499	N-acetylarginine	Amino Acid	Urea cycle; Arginine and Proline Metabolism	33953	LC/MS Pos Early	2245	217.13	67427	155-84-0	C02562	HMDB0004620	611901	813938	1162084	1053974	1028199	1272175
504	N-acetylcitrulline	Amino Acid	Urea cycle; Arginine and Proline Metabolism	48434	LC/MS Neg	940	216.099	656979	33965-42-3	C15532,C02851	HMDB0000856			77834		44779
505	N-acetylproline	Amino Acid	Urea cycle; Arginine and Proline Metabolism	34387	LC/MS Pos Early	1695	158.081	322640	1074-79-9		HMDB0094701	237188	307964	282505	166987	203792
509	N-alpha-acetylornithine	Amino Acid	Urea cycle; Arginine and Proline Metabolism	32984	LC/MS Pos Early	2000	175.108	439232	6205-08-09	C00437	HMDB0003357
508	N-delta-acetylornithine	Amino Acid	Urea cycle; Arginine and Proline Metabolism	43249	LC/MS Neg	858	173.093	9920500		C00437	HMDB0003357	890253	1305503	1610566	1465516	2436437	2012257
518	N-methylproline	Amino Acid	Urea cycle; Arginine and Proline Metabolism	37431	LC/MS Pos Early	1335	130.086	643474	475-11-6		HMDB0094696	3794540	3433500	5003212	4239867	2771593	2334921
510	N2,N5-diacetylornithine	Amino Acid	Urea cycle; Arginine and Proline Metabolism	43591	LC/MS Neg	1367	215.104	65977	39825-23-5			49544	53346	49992	20257		124403
487	ornithine	Amino Acid	Urea cycle; Arginine and Proline Metabolism	1493	LC/MS Pos Early	2800	133.097	6262	3184-13-2	C00077	HMDB0000214	117229040	161170240	168810960	160179520	239028768	195928448
515	prolylhydroxyproline	Amino Acid	Urea cycle; Arginine and Proline Metabolism	35127	LC/MS Pos Early	2128	229.118	11902893	18684-24-7		HMDB0006695	21660164	26320016	30444700	26875378	33142200	29858778
495	proline	Amino Acid	Urea cycle; Arginine and Proline Metabolism	1898	LC/MS Pos Early	1603	116.071	145742;614;8988	147-85-3	C00148,C000763	HMDB0000162,HMDB0003411	1587200896	1685607936	1826680448	1640913280	1716783232	1786656256
513	hydroxyproline	Amino Acid	Urea cycle; Arginine and Proline Metabolism	32306	LC/MS Pos Early	1064	132.065	5810	51-35-4	C01157	HMDB0000725	54057860	63945236	64279488	53473856	72390696	62944256
485	urea	Amino Acid	Urea cycle; Arginine and Proline Metabolism	1670	LC/MS Pos Early	700	121.072	1176	57-13-6	C00086	HMDB0000294	134030496	245044704	258733248	196098944	232957584	182201136
4427	4-oxo-retinoic acid	Cofactors and Vitamins	Vitamin A Metabolism	39760	LC/MS Pos Late	1298	315.195	6437063	38030-57-8		HMDB0006285	702612	634360	854886	807275	763620	713574
4434	beta-cryptoxanthin	Cofactors and Vitamins	Vitamin A Metabolism	57591	LC/MS Pos Late	2560	552.433	5281235	472-70-8	C08591	HMDB0033844	5327019	5762578	7203445	6006333	14415180	10260509
4430	carotene diol (1)	Cofactors and Vitamins	Vitamin A Metabolism	57635	LC/MS Pos Late	1720	568.428					41819060	42546724	40048960	40027296	98410896	101127816
4431	carotene diol (2)	Cofactors and Vitamins	Vitamin A Metabolism	57636	LC/MS Pos Late	1904	568.428					10005195	8690051	8246551	8780126	22612404	22217494
4432	carotene diol (3)	Cofactors and Vitamins	Vitamin A Metabolism	57637	LC/MS Pos Late	1948	568.428					3488725	3520208	3195019	3274772	7954919	7535056
4428	retinol (Vitamin A)	Cofactors and Vitamins	Vitamin A Metabolism	1806	LC/MS Pos Late	1636	269.226	445354	68-26-8	C00473	HMDB0000305	9575371	16011692	16155101	15222591	16978870	16275747
4450	pyridoxate	Cofactors and Vitamins	Vitamin B6 Metabolism	31555	LC/MS Neg	2185	182.046	6723	82-82-6	C00847	HMDB0000017	32214032	18547518	33234128	26925128	9521237	9215427
4598	1,3,7-trimethylurate	Xenobiotics	Xanthine Metabolism	34404	LC/MS Neg	1985	209.068	79437	5415-44-1	C16361	HMDB0002123
4595	1,3-dimethylurate	Xenobiotics	Xanthine Metabolism	32391	LC/MS Neg	1671.4	195.052	70346	944-73-0		HMDB0001857
4596	1,7-dimethylurate	Xenobiotics	Xanthine Metabolism	34400	LC/MS Neg	1578.6	195.052	91611	33868-03-0	C16356	HMDB0011103
4593	1-methylurate	Xenobiotics	Xanthine Metabolism	34395	LC/MS Pos Early	1461	183.051	69726	708-79-2	C16359	HMDB0003099
4599	1-methylxanthine	Xenobiotics	Xanthine Metabolism	34389	LC/MS Neg	1568.8	165.042	80220	6136-37-4	C16358	HMDB0010738
4597	3,7-dimethylurate	Xenobiotics	Xanthine Metabolism	34399	LC/MS Neg	1418	195.052	83126	13087-49-5	C16360	HMDB0001982
4600	3-methylxanthine	Xenobiotics	Xanthine Metabolism	32445	LC/MS Neg	1700	165.042	70639	1076-22-8	C16357	HMDB0001886
4602	5-acetylamino-6-amino-3-methyluracil	Xenobiotics	Xanthine Metabolism	34424	LC/MS Polar	1710	197.068	88299	1196153-01-1	C16366	HMDB0004400
4601	7-methylxanthine	Xenobiotics	Xanthine Metabolism	34390	LC/MS Pos Early	1350	167.056	68374	552-62-5	C16353	HMDB0001991
4589	caffeine	Xenobiotics	Xanthine Metabolism	569	LC/MS Pos Early	2106	195.088	2519	58-08-2	C07481	HMDB0001847
4590	paraxanthine	Xenobiotics	Xanthine Metabolism	18254	LC/MS Neg	2279	179.058	4687	611-59-6	C13747	HMDB0001860
4591	theobromine	Xenobiotics	Xanthine Metabolism	18392	LC/MS Pos Early	1600	181.072	5429	83-67-0	C07480	HMDB0002825
4592	theophylline	Xenobiotics	Xanthine Metabolism	18394	LC/MS Pos Early	1870	181.072	2153	58-55-9	C07130	HMDB0001889
											SAMPLE_ID	7642439	7642440	7642441	7642442	7642443	7642444
											PARENT_SAMPLE_ID	7638184	7638185	7638186	7638187	7638188	7638189
											SAMPLE_NAME	DEVO-00001	DEVO-00002	DEVO-00003	DEVO-00004	DEVO-00005	DEVO-00006
											CLIENT_IDENTIFIER	RGB-1823_11_14	RGB-1823_11_22	RGB-1823_2_13	RGB-1823_2_21	RGB-1823_5_26	RGB-1823_6_2
											CLINICIAN_ID	Rajasekaran	Rajasekaran	Rajasekaran	Rajasekaran	Rajasekaran	Rajasekaran
											PATIENT_ID	RGB-1823_11_14	RGB-1823_11_22	RGB-1823_2_13	RGB-1823_2_21	RGB-1823_5_26	RGB-1823_6_2
											PROJECT_CODE_ID	DEVO-01-PMPGA	DEVO-01-PMPGA	DEVO-01-PMPGA	DEVO-01-PMPGA	DEVO-01-PMPGA	DEVO-01-PMPGA
											SPECIMEN_TYPE	Plasma	Plasma	Plasma	Plasma	Plasma	Plasma

## Sheet: Unmerged Z-scores
	Single patient DFMO-
	Z-score table of identified biochemicals for each subject against a healthy control population of pediatric subjects. Red and green shaded cells indicate z-score > 97.5th percentile and z-score < 2.5th percentile, respectively.
								Reference Range 866 Pediatric Cohort			Z-scores
	Pathway Sort Order	Super Pathway	Sub Pathway	Biochemical Name	KEGG	HMDB	X	2.5th Percentile	97.5th Percentile	X	Pre-DFMO	1st	2nd	3rd	4th	5th	X	Super Pathway	Sub Pathway	Chemical ID
	1	Amino Acid	Glycine, Serine and Threonine Metabolism	glycine	C00037	HMDB0000123		-1.8533	2.1867		-0.1133	-0.2711	0.1564	-0.3333	0.2056	0.4168		Amino Acid	Glycine, Serine and Threonine Metabolism	340
	2	Amino Acid	Glycine, Serine and Threonine Metabolism	N-acetylglycine		HMDB0000532		-1.9122	2.7467		-0.6173	0.6393	0.8319	0.2129	0.6168	0.114		Amino Acid	Glycine, Serine and Threonine Metabolism	100001006
	5	Amino Acid	Glycine, Serine and Threonine Metabolism	sarcosine	C00213	HMDB0000271		-2.1751	1.532		0.341	0.016	-0.0421	1.3661	2.1449	-0.3116		Amino Acid	Glycine, Serine and Threonine Metabolism	1023
	6	Amino Acid	Glycine, Serine and Threonine Metabolism	dimethylglycine	C03626	HMDB0000092		-1.8418	2.2041		-0.3875	1.2931	0.2856	0.6114	0.8977	0.4222		Amino Acid	Glycine, Serine and Threonine Metabolism	806
	7	Amino Acid	Glycine, Serine and Threonine Metabolism	betaine	C00719	HMDB0000043		-1.9649	1.9466		0.178	0.0742	-0.4429	0.1891	-0.832	0.0359		Amino Acid	Glycine, Serine and Threonine Metabolism	799
	10	Amino Acid	Glycine, Serine and Threonine Metabolism	serine	C00065	HMDB0000187		-2.1623	1.8634		-1.4579	-1.3218	-0.5365	-1.2359	-0.2349	0.0091		Amino Acid	Glycine, Serine and Threonine Metabolism	503
	11	Amino Acid	Glycine, Serine and Threonine Metabolism	N-acetylserine		HMDB0002931		-1.9054	1.8623		-0.7753	-0.4252	-0.8571	-1.2383	-0.8068	-1.0918		Amino Acid	Glycine, Serine and Threonine Metabolism	100001851
	16	Amino Acid	Glycine, Serine and Threonine Metabolism	2-methylserine	C02115			-2.1679	1.4066									Amino Acid	Glycine, Serine and Threonine Metabolism	100009246
	17	Amino Acid	Glycine, Serine and Threonine Metabolism	threonine	C00188	HMDB0000167		-2.1339	1.9742		-1.3027	-1.2272	-0.2529	-0.6355	0.0791	-0.5073		Amino Acid	Glycine, Serine and Threonine Metabolism	564
	18	Amino Acid	Glycine, Serine and Threonine Metabolism	N-acetylthreonine		HMDB0062557		-2.2102	1.9437		-2.6708	-0.8723	-0.9169	-1.4397	-1.138	-0.9831		Amino Acid	Glycine, Serine and Threonine Metabolism	100001274
	29	Amino Acid	Alanine and Aspartate Metabolism	alanine	C00041	HMDB0000161		-1.924	2.0076		-0.5569	-0.7319	-0.469	-0.4556	-1.1374	0.3781		Amino Acid	Alanine and Aspartate Metabolism	811
	31	Amino Acid	Alanine and Aspartate Metabolism	N-acetylalanine	C02847	HMDB0000766		-2.0233	1.9214		-0.457	-0.5083	-1.4367	-0.9993	-0.6056	-0.5937		Amino Acid	Alanine and Aspartate Metabolism	1110
	36	Amino Acid	Alanine and Aspartate Metabolism	aspartate	C00049	HMDB0000191		-1.9635	1.5773		-0.8603	-0.6308	-0.7165	-1.3113	-1.2568	-0.8455		Amino Acid	Alanine and Aspartate Metabolism	234
	37	Amino Acid	Alanine and Aspartate Metabolism	N-acetylaspartate (NAA)	C01042	HMDB0000812			1.3448									Amino Acid	Alanine and Aspartate Metabolism	100000787
	40	Amino Acid	Alanine and Aspartate Metabolism	asparagine	C00152	HMDB0000168		-2.1285	1.9917		-2.0756	-1.342	-0.794	-1.0811	-0.6631	0.3053		Amino Acid	Alanine and Aspartate Metabolism	917
	43	Amino Acid	Alanine and Aspartate Metabolism	hydroxyasparagine**	C20631	HMDB32332												Amino Acid	Alanine and Aspartate Metabolism	100020205
	44	Amino Acid	Glutamate Metabolism	glutamate	C00025 C00217	HMDB0000148		-2.1926	1.7584		0.3601	0.1889	0.3083	-0.2695	-0.4839	-0.8428		Amino Acid	Glutamate Metabolism	561
	45	Amino Acid	Glutamate Metabolism	glutamine	C00064	HMDB0000641		-2.8528	1.5896		-1.4224	-1.0644	-0.6106	-0.3255	0.7317	0.3622		Amino Acid	Glutamate Metabolism	563
	46	Amino Acid	Glutamate Metabolism	alpha-ketoglutaramate*	C00940	HMDB0001552												Amino Acid	Glutamate Metabolism	100002397
	47	Amino Acid	Glutamate Metabolism	N-acetylglutamate	C00624	HMDB0001138		-2.0317	1.7182		-1.6294	-0.8433	-1.2789	-1.3048	-0.6541	-1.0962		Amino Acid	Glutamate Metabolism	100000282
	48	Amino Acid	Glutamate Metabolism	N-acetylglutamine	C02716	HMDB0006029			1.7594		-0.745		-0.3675	-0.881	-0.1907	0.1173		Amino Acid	Glutamate Metabolism	100001253
	51	Amino Acid	Glutamate Metabolism	4-hydroxyglutamate	C03079	HMDB0001344			1.5394		2.3298	1.2529	1.2752	2.0799	0.0255	-0.9599		Amino Acid	Glutamate Metabolism	100002544
	54	Amino Acid	Glutamate Metabolism	glutamate, gamma-methyl ester		HMDB0061715			2.2162									Amino Acid	Glutamate Metabolism	100001103
	55	Amino Acid	Glutamate Metabolism	N-acetyl-aspartyl-glutamate (NAAG)	C12270	HMDB0001067		-2.9705	1.4445									Amino Acid	Glutamate Metabolism	100001612
	56	Amino Acid	Glutamate Metabolism	beta-citrylglutamate	C20775			-1.8728	2.0032		-0.9456	-0.4305	0.2083	-0.9352	0.0066	0.2679		Amino Acid	Glutamate Metabolism	100003271
	58	Amino Acid	Glutamate Metabolism	carboxyethyl-GABA		HMDB0002201		-3.3673	1.9023		-0.0852	-1.1797	-1.582	-0.7315	-0.6405	-0.5301		Amino Acid	Glutamate Metabolism	100003260
	60	Amino Acid	Glutamate Metabolism	2-pyrrolidinone		HMDB0002039		-2.2836	3.04		2.6736	0.8388	1.4622	1.6122	-0.4741	0.3243		Amino Acid	Glutamate Metabolism	100001081
	62	Amino Acid	Glutamate Metabolism	S-1-pyrroline-5-carboxylate	C04322	HMDB0001301			1.8801				0.82	1.0237	2.198	2.0607		Amino Acid	Glutamate Metabolism	35
	63	Amino Acid	Glutamate Metabolism	citramalate	C00815	HMDB0000426			1.7668		0.5106	0.3289	-0.1457					Amino Acid	Glutamate Metabolism	100000998
	70	Amino Acid	Histidine Metabolism	histidine	C00135	HMDB0000177		-2.0816	2.0007		-2.0055	-1.8769	-0.454	0.3837	-0.593	0.4966		Amino Acid	Histidine Metabolism	355
	71	Amino Acid	Histidine Metabolism	1-methylhistidine	C01152	HMDB0000001		-1.6106	2.0927		-0.3888	0.1008	0.8322	-0.1471	0.9678	-0.1573		Amino Acid	Histidine Metabolism	100001051
	72	Amino Acid	Histidine Metabolism	3-methylhistidine	C01152	HMDB0000479		-1.7603	1.7651		-0.36	-0.821	0.2916	0.1487	0.8884	-0.3204		Amino Acid	Histidine Metabolism	100000042
	73	Amino Acid	Histidine Metabolism	N-acetylhistidine	C02997	HMDB0032055			1.5355		-0.1011	0.4287	-0.1446	0.047	-0.6576	0.2677		Amino Acid	Histidine Metabolism	100001293
	75	Amino Acid	Histidine Metabolism	N-acetyl-3-methylhistidine*					1.6711						1.1654	0.586		Amino Acid	Histidine Metabolism	100002204
	76	Amino Acid	Histidine Metabolism	N-acetyl-1-methylhistidine*					1.6014				0.0137					Amino Acid	Histidine Metabolism	100004299
	77	Amino Acid	Histidine Metabolism	hydantoin-5-propionate	C05565	HMDB0001212			1.6512			0.3896	-0.0449	-0.2516	0.8455	0.0105		Amino Acid	Histidine Metabolism	100002514
	78	Amino Acid	Histidine Metabolism	trans-urocanate	C00785	HMDB0000301		-1.9876	1.9074		-0.1702	0.525	-1.002	-0.3069	-1.5479	-0.669		Amino Acid	Histidine Metabolism	537
	80	Amino Acid	Histidine Metabolism	imidazole propionate		HMDB0002271			1.9998									Amino Acid	Histidine Metabolism	100003434
	81	Amino Acid	Histidine Metabolism	formiminoglutamate	C00439	HMDB0000854												Amino Acid	Histidine Metabolism	100002500
	83	Amino Acid	Histidine Metabolism	imidazole lactate	C05568	HMDB0002320		-1.5986	2.5969		-0.7079	-0.6575	-0.9065	-0.72	-0.8362	-1.1062		Amino Acid	Histidine Metabolism	100000263
	84	Amino Acid	Histidine Metabolism	carnosine	C00386	HMDB0000033												Amino Acid	Histidine Metabolism	249
	86	Amino Acid	Histidine Metabolism	N-acetylcarnosine		HMDB0012881			2.4221		0.1002	-0.0456	0.3462	-0.0162	0.2698	-0.3624		Amino Acid	Histidine Metabolism	100004046
	87	Amino Acid	Histidine Metabolism	anserine	C01262	HMDB0000194												Amino Acid	Histidine Metabolism	100000044
	91	Amino Acid	Histidine Metabolism	1-methyl-4-imidazoleacetate	C05828	HMDB0002820		-2.2812	1.7896		-0.0274	0.603	0.0906	0.1454	0.792	-0.1406		Amino Acid	Histidine Metabolism	100001208
	97	Amino Acid	Histidine Metabolism	4-imidazoleacetate	C02835	HMDB0002024			1.8037		1.1974	1.3699	1.2104	0.8978	1.0732	1.0443		Amino Acid	Histidine Metabolism	100001207
	105	Amino Acid	Lysine Metabolism	lysine	C00047 C00739	HMDB0003405		-2.1771	1.9112		-1.2799	-1.6332	-0.849	-0.8413	-0.9044	-0.1654		Amino Acid	Lysine Metabolism	407
	107	Amino Acid	Lysine Metabolism	N6-acetyllysine	C02727	HMDB0000206		-2.402	1.9704		-0.1097	0.4129	0.8639	-0.2812	1.6258	0.5035		Amino Acid	Lysine Metabolism	100001734
	116	Amino Acid	Lysine Metabolism	N6,N6,N6-trimethyllysine	C03793	HMDB0001325		-2.0569	2.4472		-1.2041	-0.9639	-0.9192	-1.2536	-0.2704	-1.0656		Amino Acid	Lysine Metabolism	189
	117	Amino Acid	Lysine Metabolism	hydroxy-N6,N6,N6-trimethyllysine*														Amino Acid	Lysine Metabolism	100021123
	119	Amino Acid	Lysine Metabolism	5-hydroxylysine	C16741	HMDB0000450		-2.445	1.8569		-0.5181	-0.7695	-0.6033	-0.7138	0.232	-0.7166		Amino Acid	Lysine Metabolism	100000054
	120	Amino Acid	Lysine Metabolism	5-(galactosylhydroxy)-L-lysine				-2.5329	1.4835									Amino Acid	Lysine Metabolism	100002462
	121	Amino Acid	Lysine Metabolism	fructosyllysine		HMDB0034879												Amino Acid	Lysine Metabolism	100005373
	123	Amino Acid	Lysine Metabolism	2-aminoadipate	C00956	HMDB0000510			1.7841		-0.3996	0.2601	0.6369	0.4206	0.681	-0.3488		Amino Acid	Lysine Metabolism	381
	127	Amino Acid	Lysine Metabolism	glutarylcarnitine (C5-DC)		HMDB0013130		-2.1724	1.7603		-1.1042	-0.0267	0.3826	0.4698	0.3668	-0.6417		Amino Acid	Lysine Metabolism	100001593
	131	Amino Acid	Lysine Metabolism	pipecolate				-1.7558	3.0512		0.0805	-0.9772	-0.0075	0.3906	1.6168	-0.0342		Amino Acid	Lysine Metabolism	1025
	133	Amino Acid	Lysine Metabolism	6-oxopiperidine-2-carboxylate		HMDB0061705		-2.136	2.071		-0.3286	0.4839	0.6307	0.3374	0.933	-0.2262		Amino Acid	Lysine Metabolism	100004499
	135	Amino Acid	Lysine Metabolism	N-acetyl-cadaverine		HMDB0002284			1.8231				0.5567					Amino Acid	Lysine Metabolism	100002249
	138	Amino Acid	Lysine Metabolism	N,N,N-trimethyl-5-aminovalerate				-2.4938	1.7847		-2.5457	-2.1792	-2.7321	-2.8407	-2.7198	-2.858		Amino Acid	Lysine Metabolism	100015962
	140	Amino Acid	Phenylalanine Metabolism	phenylalanine	C00079	HMDB0000159		-2.2994	1.9743		-0.5432	-0.2441	-0.3205	-0.4825	-0.3583	-0.3621		Amino Acid	Phenylalanine Metabolism	460
	141	Amino Acid	Phenylalanine Metabolism	N-acetylphenylalanine	C03519	HMDB0000512		-2.1336	2.0813		0.5834	0.415	1.3995	0.2334	-0.3302	0.0312		Amino Acid	Phenylalanine Metabolism	100001256
	146	Amino Acid	Phenylalanine Metabolism	1-carboxyethylphenylalanine														Amino Acid	Phenylalanine Metabolism	100020419
	150	Amino Acid	Phenylalanine Metabolism	phenylpyruvate	C00166	HMDB0000205		-1.8478	2.3976									Amino Acid	Phenylalanine Metabolism	241
	151	Amino Acid	Phenylalanine Metabolism	phenyllactate (PLA)	C05607	HMDB0000779 HMDB0000563		-1.9185	2.3802		-2.0265	-1.2755	-1.2848	-1.5593	-2.0916	-1.5058		Amino Acid	Phenylalanine Metabolism	100000774
	155	Amino Acid	Phenylalanine Metabolism	phenylacetate	C07086	HMDB0000209			1.5833									Amino Acid	Phenylalanine Metabolism	100000011
	156	Amino Acid	Phenylalanine Metabolism	2-hydroxyphenylacetate	C05852	HMDB0000669			1.8874									Amino Acid	Phenylalanine Metabolism	235
	159	Amino Acid	Phenylalanine Metabolism	4-hydroxyphenylacetate	C00642	HMDB0000020			1.7586		1.0635	1.1122	1.4232	0.881	0.9623	1.1121		Amino Acid	Phenylalanine Metabolism	144
	162	Amino Acid	Tyrosine Metabolism	tyrosine	C00082	HMDB0000158		-1.9313	1.9738		0.5901	-0.1494	-0.2323	0.5797	1.4725	0.8789		Amino Acid	Tyrosine Metabolism	815
	163	Amino Acid	Tyrosine Metabolism	N-acetyltyrosine		HMDB0000866			1.8411		0.9002	0.3923	0.7639	0.7176	0.5832	0.8077		Amino Acid	Tyrosine Metabolism	100001104
	175	Amino Acid	Tyrosine Metabolism	4-hydroxyphenylpyruvate	C01179	HMDB0000707		-1.926	2.0091									Amino Acid	Tyrosine Metabolism	1141
	181	Amino Acid	Tyrosine Metabolism	3-(4-hydroxyphenyl)lactate	C03672	HMDB0000755		-2.0287	2.0544		-0.8729	-0.6256	-1.6626	-0.9826	-0.8482	-1.1499		Amino Acid	Tyrosine Metabolism	240
	190	Amino Acid	Tyrosine Metabolism	phenol sulfate	C02180	HMDB0060015		-2.2774	1.9484		-1.2337	-0.6155	-0.3263	-0.5813	-0.3543	-0.207		Amino Acid	Tyrosine Metabolism	100001510
	201	Amino Acid	Tyrosine Metabolism	vanillactate		HMDB0000913			1.7434		-2.1027	-0.5679	-0.9275	-1.0353	-1.1246	-1.5175		Amino Acid	Tyrosine Metabolism	100006129
	202	Amino Acid	Tyrosine Metabolism	vanillylmandelate (VMA)	C05584	HMDB0000291		-2.3779	1.7915		1.1767	1.207	0.5225	0.3632	0.9175	0.2149		Amino Acid	Tyrosine Metabolism	1111
	204	Amino Acid	Tyrosine Metabolism	3-methoxytyrosine		HMDB0001434		-1.989	1.7037		-0.5998	-0.606	-1.1201	-1.3129	-0.6643	-0.5653		Amino Acid	Tyrosine Metabolism	1342
	206	Amino Acid	Tyrosine Metabolism	3-methoxytyramine sulfate					1.7488									Amino Acid	Tyrosine Metabolism	100004634
	219	Amino Acid	Tyrosine Metabolism	gentisate	C00628	HMDB0000152			1.7383									Amino Acid	Tyrosine Metabolism	100000447
	223	Amino Acid	Tyrosine Metabolism	dopamine 4-sulfate	C13691	HMDB0004148			2.2776									Amino Acid	Tyrosine Metabolism	100006360
	224	Amino Acid	Tyrosine Metabolism	dopamine 3-O-sulfate	C13690	HMDB0006275		-1.6396	3.1523		0.6594	1.2041	0.2253	0.1129	0.8461	0.4378		Amino Acid	Tyrosine Metabolism	100006361
	225	Amino Acid	Tyrosine Metabolism	p-cresol glucuronide*		HMDB0011686			1.609		1.4669	1.7056	1.351	1.2369	1.1084	1.7173		Amino Acid	Tyrosine Metabolism	100006191
	226	Amino Acid	Tyrosine Metabolism	tyramine O-sulfate		HMDB0006409			2.2077		0.7076	0.7301	1.057	1.0538	0.9637	1.4926		Amino Acid	Tyrosine Metabolism	100006092
	227	Amino Acid	Tyrosine Metabolism	N-formylphenylalanine		HMDB0240317			1.6114									Amino Acid	Tyrosine Metabolism	100006056
	228	Amino Acid	Tyrosine Metabolism	vanillic alcohol sulfate		HMDB0041788			1.6935		1.1452	1.7157	1.3693	1.3528	1.7154	1.9037		Amino Acid	Tyrosine Metabolism	100006125
	245	Amino Acid	Tyrosine Metabolism	thyroxine	C01829	HMDB0000248		-2.2194	1.7706		0.3433	0.3558	-0.2602	-0.422	-0.6163	-0.597		Amino Acid	Tyrosine Metabolism	1094
	254	Amino Acid	Tryptophan Metabolism	tryptophan	C00078	HMDB0000929		-2.483	1.7603		-0.4207	-0.3527	0.2719	-0.0748	-0.8166	-0.3027		Amino Acid	Tryptophan Metabolism	565
	255	Amino Acid	Tryptophan Metabolism	N-acetyltryptophan	C03137	HMDB0013713		-2.6548	1.9241		0.8049	1.661	0.6818	1.6487	1.3872	1.7085		Amino Acid	Tryptophan Metabolism	100001254
	261	Amino Acid	Tryptophan Metabolism	C-glycosyltryptophan		HMDB0240296		-2.0923	1.7719		-0.8705	-0.1857	-0.7144	-1.0606	-0.9134	-0.6574		Amino Acid	Tryptophan Metabolism	100006379
	264	Amino Acid	Tryptophan Metabolism	tryptophan betaine	C09213	HMDB0061115		-2.0089	1.5145		0.0756	0.1193	-0.6599	-0.7293	-1.2948	-1.2091		Amino Acid	Tryptophan Metabolism	100001743
	267	Amino Acid	Tryptophan Metabolism	kynurenine	C00328	HMDB0000684		-2.4352	2.1836		-0.591	-0.7789	-0.2742	-0.8576	-1.9309	-1.2529		Amino Acid	Tryptophan Metabolism	100000265
	270	Amino Acid	Tryptophan Metabolism	N-acetylkynurenine (2)					1.8339									Amino Acid	Tryptophan Metabolism	100006378
	272	Amino Acid	Tryptophan Metabolism	kynurenate	C01717	HMDB0000715		-2.094	2.0942		-1.4385	-0.9356	-0.3673	-0.8991	-1.2255	-1.3083		Amino Acid	Tryptophan Metabolism	98
	274	Amino Acid	Tryptophan Metabolism	N-formylanthranilic acid	C05653	HMDB0004089			2.046		0.368	1.2021	0.5048	0.8315	0.6909	0.6845		Amino Acid	Tryptophan Metabolism	100004561
	278	Amino Acid	Tryptophan Metabolism	xanthurenate	C02470	HMDB0000881			1.4359									Amino Acid	Tryptophan Metabolism	100000015
	282	Amino Acid	Tryptophan Metabolism	picolinate	C10164	HMDB0002243												Amino Acid	Tryptophan Metabolism	1022
	287	Amino Acid	Tryptophan Metabolism	serotonin	C00780	HMDB0000259			1.435									Amino Acid	Tryptophan Metabolism	504
	290	Amino Acid	Tryptophan Metabolism	5-hydroxyindoleacetate	C05635	HMDB0000763			2.2556									Amino Acid	Tryptophan Metabolism	71
	298	Amino Acid	Tryptophan Metabolism	indolelactate	C02043	HMDB0000671		-1.8911	2.0957		-0.9349	-0.222	0.2665	-0.1644	-0.8765	-0.9703		Amino Acid	Tryptophan Metabolism	100000463
	299	Amino Acid	Tryptophan Metabolism	indoleacetate	C00954	HMDB0000197		-1.9092	2.0035		1.252	1.1458	1.0095	0.7682	0.549	0.694		Amino Acid	Tryptophan Metabolism	100001034
	305	Amino Acid	Tryptophan Metabolism	indolepropionate		HMDB0002302			1.3635		0.386	-0.388	0.7812	0.1051	-0.0516	-0.1159		Amino Acid	Tryptophan Metabolism	100001083
	307	Amino Acid	Tryptophan Metabolism	indoleacetylglutamine		HMDB0013240			1.7188		1.3753	1.0962	1.9764	1.8261	1.275	1.7626		Amino Acid	Tryptophan Metabolism	100001731
	316	Amino Acid	Tryptophan Metabolism	indole-3-carboxylate	C19837	HMDB0003320			1.6603		1.7533	1.8224	2.3833		0.9125	2.9068		Amino Acid	Tryptophan Metabolism	100002185
	322	Amino Acid	Tryptophan Metabolism	3-indoxyl sulfate		HMDB0000682		-2.6316	1.5802		1.3684	1.5882	1.6668	0.8769	1.0895	1.2318		Amino Acid	Tryptophan Metabolism	100000467
	327	Amino Acid	Tryptophan Metabolism	6-bromotryptophan				-2.5057	1.7959		-0.5808	-0.0494	-0.0457	-0.1469	0.0822	-0.17		Amino Acid	Tryptophan Metabolism	100020414
	332	Amino Acid	Leucine, Isoleucine and Valine Metabolism	leucine	C00123	HMDB0000687		-1.9839	1.8774		-1.0894	-0.824	-0.6411	-0.8507	0.0377	-0.9449		Amino Acid	Leucine, Isoleucine and Valine Metabolism	397
	336	Amino Acid	Leucine, Isoleucine and Valine Metabolism	N-acetylleucine	C02710	HMDB0011756			1.8891		-0.1147	0.5175	-0.3401	-1.5413	0.004	-0.1809		Amino Acid	Leucine, Isoleucine and Valine Metabolism	1082
	343	Amino Acid	Leucine, Isoleucine and Valine Metabolism	4-methyl-2-oxopentanoate	C00233	HMDB0000695		-2.1809	1.9908		0.602	1.1553	0.5851	0.495	0.7983	0.2114		Amino Acid	Leucine, Isoleucine and Valine Metabolism	100000551
	347	Amino Acid	Leucine, Isoleucine and Valine Metabolism	alpha-hydroxyisocaproate	C03264	HMDB0000665 HMDB0000624 HMDB00746		-1.5624	1.7656		-1.5958	-1.152	-1.2715	-1.4226	-1.921	-1.8236		Amino Acid	Leucine, Isoleucine and Valine Metabolism	100000706
	351	Amino Acid	Leucine, Isoleucine and Valine Metabolism	isovalerate (i5:0)	C08262	HMDB0000718			1.7318		0.978	0.8957	0.9497	0.6811	0.7852	0.588		Amino Acid	Leucine, Isoleucine and Valine Metabolism	100000708
	353	Amino Acid	Leucine, Isoleucine and Valine Metabolism	isovalerylglycine		HMDB00678			1.7484		-0.2695	0.1748	0.351	-0.2448	-0.0455	3.1392		Amino Acid	Leucine, Isoleucine and Valine Metabolism	100001452
	354	Amino Acid	Leucine, Isoleucine and Valine Metabolism	isovalerylcarnitine (C5)	C20826	HMDB0000688		-1.9838	1.8771		-0.5001	0.4399	0.5815	0.3839	1.1896	0.2742		Amino Acid	Leucine, Isoleucine and Valine Metabolism	100001393
	361	Amino Acid	Leucine, Isoleucine and Valine Metabolism	3-methylcrotonylglycine	C20828	HMDB0000459												Amino Acid	Leucine, Isoleucine and Valine Metabolism	100001149
	363	Amino Acid	Leucine, Isoleucine and Valine Metabolism	beta-hydroxyisovalerate		HMDB0000754			1.9362		-0.8358	0.119	-0.4549	-0.438	-0.1146	-0.5791		Amino Acid	Leucine, Isoleucine and Valine Metabolism	1442
	364	Amino Acid	Leucine, Isoleucine and Valine Metabolism	beta-hydroxyisovaleroylcarnitine														Amino Acid	Leucine, Isoleucine and Valine Metabolism	100001594
	367	Amino Acid	Leucine, Isoleucine and Valine Metabolism	3-methylglutaconate		HMDB0000522		-2.1072	2.0066		1.589	1.4545	2.2092	1.369	1.0225	1.6243		Amino Acid	Leucine, Isoleucine and Valine Metabolism	100002458
	375	Amino Acid	Leucine, Isoleucine and Valine Metabolism	3-methylglutarylcarnitine (2)		HMDB0000552			2.0106		0.1147	0.3866	1.012	0.3319	0.9543	0.7718		Amino Acid	Leucine, Isoleucine and Valine Metabolism	100005850
	385	Amino Acid	Leucine, Isoleucine and Valine Metabolism	isoleucine	C16424 C00407 C06418	HMDB0000172		-2.1361	1.7897		-0.8579	-0.4433	-0.3982	-0.6277	0.4408	-0.7007		Amino Acid	Leucine, Isoleucine and Valine Metabolism	376
	386	Amino Acid	Leucine, Isoleucine and Valine Metabolism	allo-isoleucine		HMDB0000557												Amino Acid	Leucine, Isoleucine and Valine Metabolism	100005840
	394	Amino Acid	Leucine, Isoleucine and Valine Metabolism	3-methyl-2-oxovalerate	C00671 C06008 C03465	HMDB0000491		-2.1425	1.9472		0.0579	0.8857	0.136	0.1902	0.8236	-0.151		Amino Acid	Leucine, Isoleucine and Valine Metabolism	100000036
	395	Amino Acid	Leucine, Isoleucine and Valine Metabolism	2-hydroxy-3-methylvalerate		HMDB0000317		-2.073	2.1493		-1.876	-1.0016	-0.8534	-1.3996	-1.5808	-1.9029		Amino Acid	Leucine, Isoleucine and Valine Metabolism	100001541
	397	Amino Acid	Leucine, Isoleucine and Valine Metabolism	2-methylbutyrylcarnitine (C5)		HMDB0000378		-3.0372	1.862		-1.0061	0.5164	0.2525	0.2005	0.2368	0.3296		Amino Acid	Leucine, Isoleucine and Valine Metabolism	100001509
	399	Amino Acid	Leucine, Isoleucine and Valine Metabolism	2-methylbutyrylglycine		HMDB0000339			1.6169									Amino Acid	Leucine, Isoleucine and Valine Metabolism	100001155
	400	Amino Acid	Leucine, Isoleucine and Valine Metabolism	tiglylcarnitine (C5:1-DC)		HMDB0002366			1.5051		-0.015	0.6226	0.8668	0.5645	0.5561	0.1213		Amino Acid	Leucine, Isoleucine and Valine Metabolism	100001597
	405	Amino Acid	Leucine, Isoleucine and Valine Metabolism	3-hydroxy-2-ethylpropionate		HMDB0000396		-2.3049	2.146		-0.0995	1.3876	0.6052	0.6109	0.7875	0.8029		Amino Acid	Leucine, Isoleucine and Valine Metabolism	100001170
	407	Amino Acid	Leucine, Isoleucine and Valine Metabolism	ethylmalonate		HMDB0000622		-1.7774	2.5883		1.0418	2.5507	1.9863	1.3102	1.7747	1.2044		Amino Acid	Leucine, Isoleucine and Valine Metabolism	2054
	410	Amino Acid	Leucine, Isoleucine and Valine Metabolism	methylsuccinate		HMDB0001844			2.2975		-0.883	0.638	2.1007	-0.935	0.778	-0.8655		Amino Acid	Leucine, Isoleucine and Valine Metabolism	2051
	416	Amino Acid	Leucine, Isoleucine and Valine Metabolism	valine	C00183	HMDB0000883		-1.8973	2.0387		-0.6479	-0.062	0.0419	0.0254	0.3775	-0.4247		Amino Acid	Leucine, Isoleucine and Valine Metabolism	566
	417	Amino Acid	Leucine, Isoleucine and Valine Metabolism	N-acetylvaline		HMDB0011757		-2.1267	2.0062		0.1489	-0.0758	-0.2426	-0.5794	-0.1186	0.1749		Amino Acid	Leucine, Isoleucine and Valine Metabolism	1084
	420	Amino Acid	Leucine, Isoleucine and Valine Metabolism	1-carboxyethylvaline														Amino Acid	Leucine, Isoleucine and Valine Metabolism	100020423
	423	Amino Acid	Leucine, Isoleucine and Valine Metabolism	3-methyl-2-oxobutyrate	C00141	HMDB0000019		-2.0779	1.9369		0.5893	1.5458	0.5796	0.8298	1.0887	0.5277		Amino Acid	Leucine, Isoleucine and Valine Metabolism	100000936
	424	Amino Acid	Leucine, Isoleucine and Valine Metabolism	alpha-hydroxyisovalerate		HMDB0000407		-1.9956	2.0604		-1.9223	-1.4035	-1.7486	-1.8778	-2.0961	-2.4443		Amino Acid	Leucine, Isoleucine and Valine Metabolism	100001300
	426	Amino Acid	Leucine, Isoleucine and Valine Metabolism	isobutyrylcarnitine (C4)		HMDB0000736		-2.0152	1.7512		0.4651	1.574	1.5077	0.7764	0.4935	1.4408		Amino Acid	Leucine, Isoleucine and Valine Metabolism	100001055
	427	Amino Acid	Leucine, Isoleucine and Valine Metabolism	isobutyrylglycine		HMDB0000730			1.5458									Amino Acid	Leucine, Isoleucine and Valine Metabolism	100001590
	428	Amino Acid	Leucine, Isoleucine and Valine Metabolism	3-hydroxyisobutyrate	C01188 C06001	HMDB0000023 HMDB0000336			1.9105		0.0583	1.9844	0.7484	0.9377	1.2099	0.5796		Amino Acid	Leucine, Isoleucine and Valine Metabolism	111
	429	Amino Acid	Leucine, Isoleucine and Valine Metabolism	2,3-dihydroxy-2-methylbutyrate		HMDB0029576			1.9304		0.1758	0.0611	-0.1632	-0.1287	0.5413	0.5308		Amino Acid	Leucine, Isoleucine and Valine Metabolism	100010869
	434	Amino Acid	Methionine, Cysteine, SAM and Taurine Metabolism	methionine	C00073	HMDB0000696		-2.0229	1.8572		-0.7371	-0.7588	-0.3317	-0.3132	0.4109	0.1956		Amino Acid	Methionine, Cysteine, SAM and Taurine Metabolism	415
	435	Amino Acid	Methionine, Cysteine, SAM and Taurine Metabolism	N-acetylmethionine	C02712	HMDB0011745		-1.9085	2.8085		-1.0859	-1.112	-1.5551	-1.5542	-1.2935	-1.1213		Amino Acid	Methionine, Cysteine, SAM and Taurine Metabolism	1083
	437	Amino Acid	Methionine, Cysteine, SAM and Taurine Metabolism	N-formylmethionine	C03145	HMDB0001015		-2.3667	1.9006		-1.4271	-0.9124	-1.2985	-1.4759	-0.438	-0.5316		Amino Acid	Methionine, Cysteine, SAM and Taurine Metabolism	194
	438	Amino Acid	Methionine, Cysteine, SAM and Taurine Metabolism	S-methylmethionine	C05319	HMDB0038670			1.7088									Amino Acid	Methionine, Cysteine, SAM and Taurine Metabolism	100002183
	439	Amino Acid	Methionine, Cysteine, SAM and Taurine Metabolism	methionine sulfone		HMDB0062174		-2.6898	1.8978		-0.3387	0.1389	0.0675	-0.2541	0.5886	0.2791		Amino Acid	Methionine, Cysteine, SAM and Taurine Metabolism	100004635
	440	Amino Acid	Methionine, Cysteine, SAM and Taurine Metabolism	methionine sulfoxide	C02989	HMDB0002005		-1.7642	2.0856		1.3407	2.0793	1.8731	1.6434	1.2198	0.0413		Amino Acid	Methionine, Cysteine, SAM and Taurine Metabolism	100000039
	446	Amino Acid	Methionine, Cysteine, SAM and Taurine Metabolism	S-adenosylhomocysteine (SAH)	C00021	HMDB00939			1.5307							-1.2721		Amino Acid	Methionine, Cysteine, SAM and Taurine Metabolism	197
	453	Amino Acid	Methionine, Cysteine, SAM and Taurine Metabolism	cystathionine	C02291	HMDB0000099			1.9392		0.787	0.6188	1.2688	0.8207	2.5984	1.4859		Amino Acid	Methionine, Cysteine, SAM and Taurine Metabolism	310
	454	Amino Acid	Methionine, Cysteine, SAM and Taurine Metabolism	alpha-ketobutyrate	C00109	HMDB0000005			1.5055									Amino Acid	Methionine, Cysteine, SAM and Taurine Metabolism	796
	455	Amino Acid	Methionine, Cysteine, SAM and Taurine Metabolism	cysteine	C00097	HMDB0000574		-2.0073	2.7155		-0.462	-0.588	-0.7372	-0.38	1.2307	0.4323		Amino Acid	Methionine, Cysteine, SAM and Taurine Metabolism	800
	457	Amino Acid	Methionine, Cysteine, SAM and Taurine Metabolism	S-methylcysteine		HMDB0002108		-2.0255	2.9883		0.2255	0.1155	-0.4016	-0.0083	0.5065	0.4889		Amino Acid	Methionine, Cysteine, SAM and Taurine Metabolism	100002749
	458	Amino Acid	Methionine, Cysteine, SAM and Taurine Metabolism	S-methylcysteine sulfoxide		HMDB0029432		-1.7358	2.7488		-0.5211	-0.0375	-0.6179	-0.5896	-0.0933	-0.2706		Amino Acid	Methionine, Cysteine, SAM and Taurine Metabolism	100002927
	461	Amino Acid	Methionine, Cysteine, SAM and Taurine Metabolism	cysteine s-sulfate	C05824	HMDB0000731		-2.0976	2.1694		-1.3931	-1.2071	-1.1445	-1.3771	-0.6643	-0.6455		Amino Acid	Methionine, Cysteine, SAM and Taurine Metabolism	100000808
	462	Amino Acid	Methionine, Cysteine, SAM and Taurine Metabolism	cystine	C00491	HMDB0000192		-2.3702	1.7638		-1.1504	-0.5679	-0.8882	-0.7231	-1.3727	0.7349		Amino Acid	Methionine, Cysteine, SAM and Taurine Metabolism	279
	466	Amino Acid	Methionine, Cysteine, SAM and Taurine Metabolism	lanthionine					1.8072									Amino Acid	Methionine, Cysteine, SAM and Taurine Metabolism	100003892
	468	Amino Acid	Methionine, Cysteine, SAM and Taurine Metabolism	cysteine sulfinic acid	C00606	HMDB0000996			1.797									Amino Acid	Methionine, Cysteine, SAM and Taurine Metabolism	100002113
	470	Amino Acid	Methionine, Cysteine, SAM and Taurine Metabolism	hypotaurine	C00519	HMDB0000965		-2.268	1.7741									Amino Acid	Methionine, Cysteine, SAM and Taurine Metabolism	358
	471	Amino Acid	Methionine, Cysteine, SAM and Taurine Metabolism	taurine	C00245	HMDB0000251		-1.8085	1.6676		-0.7392	-0.0743	0.4226	-1.144	-0.65	1.1652		Amino Acid	Methionine, Cysteine, SAM and Taurine Metabolism	512
	473	Amino Acid	Methionine, Cysteine, SAM and Taurine Metabolism	N-acetyltaurine		HMDB0240253		-2.1117	1.9844									Amino Acid	Methionine, Cysteine, SAM and Taurine Metabolism	100005466
	483	Amino Acid	Urea cycle; Arginine and Proline Metabolism	arginine	C00062	HMDB0000517		-2.5523	1.4492		0.5648	0.2684	0.6793	0.5715	0.8758	1.1088		Amino Acid	Urea cycle; Arginine and Proline Metabolism	231
	484	Amino Acid	Urea cycle; Arginine and Proline Metabolism	argininosuccinate	C03406	HMDB0000052												Amino Acid	Urea cycle; Arginine and Proline Metabolism	232
	485	Amino Acid	Urea cycle; Arginine and Proline Metabolism	urea	C00086	HMDB0000294		-2.0642	1.6351		-0.7902	0.4369	0.5475	-0.0163	0.334	-0.1658		Amino Acid	Urea cycle; Arginine and Proline Metabolism	533
	487	Amino Acid	Urea cycle; Arginine and Proline Metabolism	ornithine	C00077	HMDB0000214		-1.9883	1.8145		-3.7693	-2.8323	-2.696	-2.8504	-1.6722	-2.2575		Amino Acid	Urea cycle; Arginine and Proline Metabolism	444
	491	Amino Acid	Urea cycle; Arginine and Proline Metabolism	2-oxoarginine*	C03771	HMDB0004225		-1.9368	1.881		-0.5319	0.3145	0.8193	0.3518	0.2972	-0.0046		Amino Acid	Urea cycle; Arginine and Proline Metabolism	100002784
	492	Amino Acid	Urea cycle; Arginine and Proline Metabolism	citrulline	C00327	HMDB0000904		-1.6621	1.8464		0.503	0.1411	0.7765	0.7446	0.6491	-0.0384		Amino Acid	Urea cycle; Arginine and Proline Metabolism	391
	493	Amino Acid	Urea cycle; Arginine and Proline Metabolism	homoarginine	C01924	HMDB0000670		-2.4469	2.3157		-0.8768	-1.1901	0.2436	0.7499	1.4145	1.1288		Amino Acid	Urea cycle; Arginine and Proline Metabolism	100000961
	494	Amino Acid	Urea cycle; Arginine and Proline Metabolism	homocitrulline	C02427	HMDB0000679		-2.3251	2.5833		2.6955	3.4258	3.2279	3.138	3.1604	2.4116		Amino Acid	Urea cycle; Arginine and Proline Metabolism	100000963
	495	Amino Acid	Urea cycle; Arginine and Proline Metabolism	proline	C00148 C000763	HMDB0000162 HMDB0003411		-1.9807	1.9051		0.2755	0.4557	0.6964	0.3752	0.5106	0.6301		Amino Acid	Urea cycle; Arginine and Proline Metabolism	480
	498	Amino Acid	Urea cycle; Arginine and Proline Metabolism	dimethylarginine (SDMA + ADMA)	C21189 C03626	HMDB0003334 HMDB0001539		-2.6819	1.843		-1.2518	-0.9486	-1.1574	-1.4393	-0.9598	-0.6094		Amino Acid	Urea cycle; Arginine and Proline Metabolism	100001810
	499	Amino Acid	Urea cycle; Arginine and Proline Metabolism	N-acetylarginine	C02562	HMDB0004620		-2.0684	1.9076		-2.2545	-1.6271	-0.844	-1.0587	-1.1132	-0.645		Amino Acid	Urea cycle; Arginine and Proline Metabolism	100001266
	504	Amino Acid	Urea cycle; Arginine and Proline Metabolism	N-acetylcitrulline	C15532 C02851	HMDB0000856			1.6232				-0.0804		-0.5809			Amino Acid	Urea cycle; Arginine and Proline Metabolism	100001577
	505	Amino Acid	Urea cycle; Arginine and Proline Metabolism	N-acetylproline		HMDB0094701			1.9889		0.1011	0.4744	0.3511	-0.4005	-0.1158			Amino Acid	Urea cycle; Arginine and Proline Metabolism	100001334
	508	Amino Acid	Urea cycle; Arginine and Proline Metabolism	N-delta-acetylornithine	C00437	HMDB0003357		-2.0096	1.9415		-0.5497	0.0114	0.3192	0.1809	0.9259	0.6456		Amino Acid	Urea cycle; Arginine and Proline Metabolism	100004523
	509	Amino Acid	Urea cycle; Arginine and Proline Metabolism	N-alpha-acetylornithine	C00437	HMDB0003357			1.8375									Amino Acid	Urea cycle; Arginine and Proline Metabolism	100000285
	510	Amino Acid	Urea cycle; Arginine and Proline Metabolism	N2,N5-diacetylornithine					1.8394		-0.7092	-0.5922	-0.695	-2.1243		0.7475		Amino Acid	Urea cycle; Arginine and Proline Metabolism	100004575
	513	Amino Acid	Urea cycle; Arginine and Proline Metabolism	trans-4-hydroxyproline	C01157	HMDB0000725		-2.2584	2.016		-2.1839	-1.6803	-1.6646	-2.2165	-1.3083	-1.7276		Amino Acid	Urea cycle; Arginine and Proline Metabolism	1001
	515	Amino Acid	Urea cycle; Arginine and Proline Metabolism	pro-hydroxy-pro		HMDB0006695		-3.1446	1.3747		-1.5319	-1.1342	-0.8371	-1.0916	-0.6638	-0.8768		Amino Acid	Urea cycle; Arginine and Proline Metabolism	100001167
	518	Amino Acid	Urea cycle; Arginine and Proline Metabolism	N-methylproline		HMDB0094696		-1.5419	2.4407		-1.0635	-1.1449	-0.8386	-0.9733	-1.3191	-1.4586		Amino Acid	Urea cycle; Arginine and Proline Metabolism	100001956
	519	Amino Acid	Urea cycle; Arginine and Proline Metabolism	N,N,N-trimethyl-alanylproline betaine (TMAP)		HMDB0240365												Amino Acid	Urea cycle; Arginine and Proline Metabolism	100020217
	522	Amino Acid	Urea cycle; Arginine and Proline Metabolism	argininate*		HMDB0003148		-1.8742	2.0585		-0.7521	-0.6422	0.4676	-0.0606	-0.3701	-0.6747		Amino Acid	Urea cycle; Arginine and Proline Metabolism	100002769
	527	Amino Acid	Creatine Metabolism	guanidinoacetate	C00581	HMDB0000128		-3.1589	1.861		-1.2321	-1.6548	0.2081	-1.2362	-2.1036			Amino Acid	Creatine Metabolism	344
	528	Amino Acid	Creatine Metabolism	creatine	C00300	HMDB0000064		-3.4408	1.6924		0.0661	1.2624	0.4503	0.1025	0.424	0.8703		Amino Acid	Creatine Metabolism	1221
	529	Amino Acid	Creatine Metabolism	creatinine	C00791	HMDB0000562		-1.2868	2.6188		-0.2975	-0.2093	-0.3588	-0.4728	0.1622	-0.3936		Amino Acid	Creatine Metabolism	275
	537	Amino Acid	Polyamine Metabolism	putrescine	C00134	HMDB0001414		-2.3115	2.2685									Amino Acid	Polyamine Metabolism	49
	538	Amino Acid	Polyamine Metabolism	N-acetylputrescine	C02714	HMDB0002064		-2.0185	1.9142		3.575	0.0524	0.3923	0.5879	1.141	1.1065		Amino Acid	Polyamine Metabolism	192
	544	Amino Acid	Polyamine Metabolism	N-acetyl-isoputreanine														Amino Acid	Polyamine Metabolism	100020487
	545	Amino Acid	Polyamine Metabolism	spermidine	C00315	HMDB0001257		-1.7407	1.9106		-0.1969	-0.4047	0.1652	-1.5986	-1.3111	0.4981		Amino Acid	Polyamine Metabolism	50
	549	Amino Acid	Polyamine Metabolism	diacetylspermidine*	C03413	HMDB0002172												Amino Acid	Polyamine Metabolism	100020242
	550	Amino Acid	Polyamine Metabolism	(N(1) + N(8))-acetylspermidine	C00612 C01029	HMDB0001276 HMDB0002189												Amino Acid	Polyamine Metabolism	100016038
	551	Amino Acid	Polyamine Metabolism	acisoga		HMDB0061384			1.734		2.5587	0.4213	-0.0259	-0.3079	0.0616	0.4742		Amino Acid	Polyamine Metabolism	100004541
	556	Amino Acid	Polyamine Metabolism	5-methylthioadenosine (MTA)	C00170	HMDB0001173			1.3041									Amino Acid	Polyamine Metabolism	212
	560	Amino Acid	Polyamine Metabolism	4-acetamidobutanoate	C02946	HMDB0003681		-2.1069	1.6571									Amino Acid	Polyamine Metabolism	1113
	562	Amino Acid	Guanidino and Acetamido Metabolism	1-methylguanidine	C02294	HMDB0001522			1.8396									Amino Acid	Guanidino and Acetamido Metabolism	100000715
	563	Amino Acid	Guanidino and Acetamido Metabolism	4-guanidinobutanoate	C01035	HMDB0003464		-1.9483	2.0081		-1.5199	-1.7952	0.7931	0.1841	-1.9032			Amino Acid	Guanidino and Acetamido Metabolism	100000096
	567	Amino Acid	Glutathione Metabolism	glutathione, oxidized (GSSG)	D00031 C00127	HMDB0003337												Amino Acid	Glutathione Metabolism	448
	573	Amino Acid	Glutathione Metabolism	cysteine-glutathione disulfide	R00900	HMDB0000656												Amino Acid	Glutathione Metabolism	100001437
	576	Amino Acid	Glutathione Metabolism	cysteinylglycine	C01419	HMDB0000078		-1.7954	3.5164		-2.048	-2.5313	-2.3823	-2.0782	-1.4082	-1.1936		Amino Acid	Glutathione Metabolism	278
	578	Amino Acid	Glutathione Metabolism	cys-gly, oxidized														Amino Acid	Glutathione Metabolism	1224
	579	Amino Acid	Glutathione Metabolism	5-oxoproline	C01879 C02237	HMDB0000267		-1.7865	2.3591		-1.1613	-1.3199	-0.9933	-1.4297	-1.7154	-1.8996		Amino Acid	Glutathione Metabolism	1021
	580	Amino Acid	Glutathione Metabolism	2-aminobutyrate	C02356	HMDB0000452		-2.178	2.0499		-0.4019	0.5223	0.3131	0.4794	0.693	-0.2201		Amino Acid	Glutathione Metabolism	1128
	582	Amino Acid	Glutathione Metabolism	2-hydroxybutyrate/2-hydroxyisobutyrate	C21297 C05984	HMDB0000729 HMDB00008		-2.1306	2.0022		-0.4845	1.2665	0.324	0.529	0.9565	-0.113		Amino Acid	Glutathione Metabolism	100008928
	632	Peptide	Gamma-glutamyl Amino Acid	gamma-glutamylalanine	C03738	HMDB0029142			1.4646									Peptide	Gamma-glutamyl Amino Acid	100001843
	634	Peptide	Gamma-glutamyl Amino Acid	gamma-glutamylglutamate	C05282	HMDB0011737			1.8123		1.8271	1.7803	1.6804	1.3543	0.1326	-0.2473		Peptide	Gamma-glutamyl Amino Acid	331
	635	Peptide	Gamma-glutamyl Amino Acid	gamma-glutamylglutamine	C05283	HMDB0011738		-2.3858	1.6422		1.2353	1.5478	1.5165	1.5736	0.5759	0.2873		Peptide	Gamma-glutamyl Amino Acid	1140
	636	Peptide	Gamma-glutamyl Amino Acid	gamma-glutamylglycine		HMDB0011667		-1.4923	2.0021		2.1418	2.1788	2.2557	1.9084	-0.1025	-0.6172		Peptide	Gamma-glutamyl Amino Acid	100001294
	637	Peptide	Gamma-glutamyl Amino Acid	gamma-glutamylhistidine		HMDB0029151		-1.9836	2.1087		1.1184	2.0678	2.5023	1.3653	0.2772	-1.6819		Peptide	Gamma-glutamyl Amino Acid	1235
	638	Peptide	Gamma-glutamyl Amino Acid	gamma-glutamylisoleucine*		HMDB0011170		-1.5472	2.2124		1.8713	2.0515	1.7386	1.4731	0.283	-0.8766		Peptide	Gamma-glutamyl Amino Acid	100001485
	639	Peptide	Gamma-glutamyl Amino Acid	gamma-glutamylleucine		HMDB0011171		-1.619	2.1573		1.5509	1.65	1.61	1.2485	0.1814	-1.0571		Peptide	Gamma-glutamyl Amino Acid	1268
	640	Peptide	Gamma-glutamyl Amino Acid	gamma-glutamyl-alpha-lysine				-1.9394	2.0727		1.2035	1.2272	1.4062	1.1935	-0.1691	-0.5906		Peptide	Gamma-glutamyl Amino Acid	100010901
	641	Peptide	Gamma-glutamyl Amino Acid	gamma-glutamyl-epsilon-lysine		HMDB0003869			1.7111		0.7718	-0.0299	1.4693	0.4488	-0.1199	-1.3488		Peptide	Gamma-glutamyl Amino Acid	100001262
	642	Peptide	Gamma-glutamyl Amino Acid	gamma-glutamylmethionine		HMDB0029155		-2.6589	1.9176		1.5133	1.7034	1.7631	1.9052	1.0567	0.2894		Peptide	Gamma-glutamyl Amino Acid	100001313
	643	Peptide	Gamma-glutamyl Amino Acid	gamma-glutamylphenylalanine		HMDB0000594		-2.005	2.0894		1.4888	1.9047	1.3853	1.0404	0.3139	-0.2931		Peptide	Gamma-glutamyl Amino Acid	100000491
	644	Peptide	Gamma-glutamyl Amino Acid	gamma-glutamylthreonine		HMDB0029159		-2.1092	1.9849		1.8716	2.0177	2.2815	1.6367	0.6944	-0.1158		Peptide	Gamma-glutamyl Amino Acid	100001314
	645	Peptide	Gamma-glutamyl Amino Acid	gamma-glutamyltryptophan		HMDB0029160			1.7436		-0.8238	-0.7409	-0.2791	-0.4029	-0.7714	-0.6394		Peptide	Gamma-glutamyl Amino Acid	100001295
	646	Peptide	Gamma-glutamyl Amino Acid	gamma-glutamyltyrosine		HMDB0011741		-2.1371	1.9893		2.0384	1.4802	1.7009	1.5973	1.8441	0.9774		Peptide	Gamma-glutamyl Amino Acid	1102
	647	Peptide	Gamma-glutamyl Amino Acid	gamma-glutamylvaline		HMDB0011172		-1.5924	2.0745		2.1677	2.4057	2.2902	2.0435	0.4741	-0.4595		Peptide	Gamma-glutamyl Amino Acid	100001126
	650	Peptide	Gamma-glutamyl Amino Acid	gamma-glutamyl-2-aminobutyrate					1.7234									Peptide	Gamma-glutamyl Amino Acid	100001502
	674	Peptide	Dipeptide	alpha-glutamylalanine		HMDB03764			2.7253									Peptide	Dipeptide	100003631
	733	Peptide	Dipeptide	cyclo(ala-pro)					2.1883		0.251	0.056	1.418	0.9029	1.003	-0.5471		Peptide	Dipeptide	100004646
	745	Peptide	Dipeptide	cyclo(gly-pro)					1.8015									Peptide	Dipeptide	100001946
	762	Peptide	Dipeptide	cyclo(leu-pro)		HMDB0034276			2.1128		-0.3489	-0.0401	0.0102	-0.4338	0.3552			Peptide	Dipeptide	100001925
	766	Peptide	Dipeptide	cyclo(met-pro)					2.2418									Peptide	Dipeptide	100006759
	769	Peptide	Dipeptide	cyclo(phe-pro)	C11847													Peptide	Dipeptide	100001927
	783	Peptide	Dipeptide	cyclo(pro-val)				-1.5433	2.3818		-0.0983	-0.0437	0.4603	0.2364	-0.2116	-0.6775		Peptide	Dipeptide	100006065
	822	Peptide	Dipeptide	glycylphenylalanine		HMDB0028848												Peptide	Dipeptide	100001268
	834	Peptide	Dipeptide	histidylalanine		HMDB0028878			1.8153									Peptide	Dipeptide	100003542
	847	Peptide	Dipeptide	isoleucylalanine		HMDB0028900		-3.1312	2.6081		-0.681	-1.0926	-0.4539	-0.3055	0.2376	-0.4649		Peptide	Dipeptide	100003163
	853	Peptide	Dipeptide	isoleucylglycine		HMDB0028907		-3.7628	1.653		-0.8743	-1.0621	-0.6692	-0.6936	-0.1572	-0.6873		Peptide	Dipeptide	100003169
	872	Peptide	Dipeptide	leucylglycine		HMDB0028929			2.693		-0.0647	-0.9516	0.2512	0.0368	0.1273	0.3748		Peptide	Dipeptide	100003185
	875	Peptide	Dipeptide	leucylleucine	C11332	HMDB0028933			1.648				0.0971	-0.1578		-0.2521		Peptide	Dipeptide	100001710
	902	Peptide	Dipeptide	methionylalanine		HMDB0028966			2.1413		-0.3643	-0.285	-0.434		-0.8832			Peptide	Dipeptide	100003651
	931	Peptide	Dipeptide	phenylalanylphenylalanine					2.7597		-0.1891	-0.1468	-0.2257	-0.2195	-0.356	-0.589		Peptide	Dipeptide	100002293
	947	Peptide	Dipeptide	prolylglycine		HMDB0011178			1.865		0.7012	1.042	0.6541	0.4217	0.9665	0.5658		Peptide	Dipeptide	100003674
	953	Peptide	Dipeptide	prolylproline		HMDB0011180												Peptide	Dipeptide	100003678
	954	Peptide	Dipeptide	prolylserine		HMDB0029026			1.7003		1.4786	1.5465	1.7361	1.6784	1.6173	1.092		Peptide	Dipeptide	100003679
	973	Peptide	Dipeptide	seryltyrosine		HMDB0029051			1.8292									Peptide	Dipeptide	100003525
	986	Peptide	Dipeptide	threonylphenylalanine		HMDB0029068			1.7928									Peptide	Dipeptide	100001125
	995	Peptide	Dipeptide	tryptophylasparagine		HMDB0029078			1.966									Peptide	Dipeptide	100003620
	1028	Peptide	Dipeptide	valylalanine		HMDB0029120		-2.3346	2.7162		-0.0328	-0.1377	0.3115	0.4365	0.5563	0.2678		Peptide	Dipeptide	100003636
	1033	Peptide	Dipeptide	valylglutamine		HMDB0029125			1.867		0.3146	0.0601	0.9884	0.7876	1.3717	0.5046		Peptide	Dipeptide	100003640
	1034	Peptide	Dipeptide	valylglycine		HMDB0029127			1.5275		-0.7306	-0.8176	-0.2972	-0.2573	-0.1307	-0.4404		Peptide	Dipeptide	100003641
	1037	Peptide	Dipeptide	valylleucine		HMDB0029131			2.383									Peptide	Dipeptide	100003210
	1048	Peptide	Dipeptide	isoleucylleucine/leucylisoleucine					2.1354		0.5286	0.3432	0.5851	0.307	0.7256	0.6114		Peptide	Dipeptide	100008939
	1049	Peptide	Dipeptide	leucylphenylalanine/isoleucylphenylalanine		HMDB0013243 HMDB0028914			3.1599			-0.6357	-0.7983		-0.4449	-0.0348		Peptide	Dipeptide	100008951
	1065	Peptide	Polypeptide	bradykinin	C00306	HMDB0004246												Peptide	Polypeptide	100000967
	1067	Peptide	Polypeptide	bradykinin, hydroxy-pro(3)		HMDB0011728												Peptide	Polypeptide	100001237
	1068	Peptide	Polypeptide	bradykinin, des-arg(9)	C00306	HMDB04246												Peptide	Polypeptide	100001292
	1072	Peptide	Polypeptide	HWESASXX*					1.7878			1.4743						Peptide	Polypeptide	100001327
	1074	Peptide	Polypeptide	HWESASLLR					1.794									Peptide	Polypeptide	100001281
	1157	Peptide	Fibrinogen Cleavage Peptide	Fibrinopeptide A*					1.8721									Peptide	Fibrinogen Cleavage Peptide	100001322
	1165	Peptide	Fibrinogen Cleavage Peptide	Fibrinopeptide A, des-ala(1)*					1.8723									Peptide	Fibrinogen Cleavage Peptide	100001323
	1166	Peptide	Fibrinogen Cleavage Peptide	Fibrinopeptide A, phosphono-ser(3)*					1.8126									Peptide	Fibrinogen Cleavage Peptide	100001324
	1184	Peptide	Acetylated Peptides	phenylacetylcarnitine					1.5713		1.5521	2.2625	1.9405	1.5208	1.5133	2.3717		Peptide	Acetylated Peptides	100006108
	1187	Peptide	Acetylated Peptides	phenylacetylglutamine	C04148	HMDB0006344		-2.0091	1.5781		1.2895	1.9142	1.6108	1.3832	1.102	2.1005		Peptide	Acetylated Peptides	100001417
	1190	Peptide	Acetylated Peptides	phenylacetylglycine	C05598	HMDB0000821												Peptide	Acetylated Peptides	100001275
	1205	Peptide	Modified Peptides	pyroglutamylglutamine		HMDB39229			1.779		0.1137	0.0996	0.5535	0.1624	0.2904	-0.3493		Peptide	Modified Peptides	100000966
	1218	Peptide	Modified Peptides	pyroglutamylvaline				-2.3083	2.586		-0.5735	-0.2991	1.226	-0.6972	-1.361	-0.665		Peptide	Modified Peptides	100001132
	1220	Carbohydrate	Glycolysis, Gluconeogenesis, and Pyruvate Metabolism	1,5-anhydroglucitol (1,5-AG)	C07326	HMDB0002712		-1.9867	1.6173		0.9333	0.8144	1.0153	1.0711	0.5525	0.4882		Carbohydrate	Glycolysis, Gluconeogenesis, and Pyruvate Metabolism	100000580
	1223	Carbohydrate	Glycolysis, Gluconeogenesis, and Pyruvate Metabolism	glucose	C00031	HMDB0000122		-4.0784	0.8198		0.6451	0.6258	0.6003	0.4675	0.5579	0.5832		Carbohydrate	Glycolysis, Gluconeogenesis, and Pyruvate Metabolism	572
	1237	Carbohydrate	Glycolysis, Gluconeogenesis, and Pyruvate Metabolism	3-phosphoglycerate	C00597	HMDB0000807			1.4435									Carbohydrate	Glycolysis, Gluconeogenesis, and Pyruvate Metabolism	132
	1239	Carbohydrate	Glycolysis, Gluconeogenesis, and Pyruvate Metabolism	pyruvate	C00022	HMDB0000243		-1.9957	1.8109									Carbohydrate	Glycolysis, Gluconeogenesis, and Pyruvate Metabolism	823
	1240	Carbohydrate	Glycolysis, Gluconeogenesis, and Pyruvate Metabolism	lactate	C00186	HMDB0000190		-2.0916	1.3631		-1.5704	-1.1285	-2.2771	-2.3478	-2.7898	-2.1934		Carbohydrate	Glycolysis, Gluconeogenesis, and Pyruvate Metabolism	482
	1243	Carbohydrate	Glycolysis, Gluconeogenesis, and Pyruvate Metabolism	glycerate	C00258	HMDB0006372 HMDB0000139		-2.269	1.6893		0.8854	0.9327	1.3452	1.3421	1.3177	0.1444		Carbohydrate	Glycolysis, Gluconeogenesis, and Pyruvate Metabolism	1052
	1261	Carbohydrate	Pentose Metabolism	ribose	C00121	HMDB0000283												Carbohydrate	Pentose Metabolism	914
	1262	Carbohydrate	Pentose Metabolism	ribitol	C00532 C01904 C00474 C00379	HMDB0002917 HMDB0000508 HMDB0001851 HMDB0000568			1.7572		0.2838	0.0463	0.3301	0.1942	0.1939	0.0148		Carbohydrate	Pentose Metabolism	100000406
	1263	Carbohydrate	Pentose Metabolism	ribonate	C01685	HMDB0000867		-2.5298	2.0976		0.3062	0.2016	0.1796	0.4223	0.0148	-0.1266		Carbohydrate	Pentose Metabolism	100001007
	1267	Carbohydrate	Pentose Metabolism	xylose	C00181	HMDB0000098			2.1505		1.1641	1.3053	0.9523	0.7045	0.2143	1.3519		Carbohydrate	Pentose Metabolism	826
	1277	Carbohydrate	Pentose Metabolism	arabitol/xylitol	C00542 C01904 C00379	HMDB0002917 HMDB0001851 HMDB0000568		-2.5614	1.8117		0.6354	0.3386	0.9461	0.3935	-0.1005	0.3161		Carbohydrate	Pentose Metabolism	100006430
	1283	Carbohydrate	Pentose Metabolism	arabonate/xylonate	C00502 C05411	HMDB0000539		-2.0034	2.3247		0.2234	0.3362	-0.1253	0.833	0.4077	-0.5075		Carbohydrate	Pentose Metabolism	100006115
	1296	Carbohydrate	Glycogen Metabolism	maltotriose	C01835	HMDB0001262												Carbohydrate	Glycogen Metabolism	100000276
	1299	Carbohydrate	Glycogen Metabolism	maltose	C00208	HMDB0000163												Carbohydrate	Glycogen Metabolism	913
	1325	Carbohydrate	Disaccharides and Oligosaccharides	sucrose	C00089	HMDB0000258			2.7169		-0.4218	-0.3389	0.441	0.0049	-0.0716	0.2706		Carbohydrate	Disaccharides and Oligosaccharides	935
	1346	Carbohydrate	Fructose, Mannose and Galactose Metabolism	fructose	C00095	HMDB0000660		-1.8992	2.1559		-1.2297	-0.3107	-0.1254	1.3335	-0.8087	0.104		Carbohydrate	Fructose, Mannose and Galactose Metabolism	878
	1351	Carbohydrate	Fructose, Mannose and Galactose Metabolism	mannitol/sorbitol	C00392 C00794	HMDB0000247 HMDB0000765		-1.4278	2.9034		0.2795	0.0845	1.7275	0.8014	0.2037	0.3416		Carbohydrate	Fructose, Mannose and Galactose Metabolism	100001740
	1352	Carbohydrate	Fructose, Mannose and Galactose Metabolism	mannose	C00159 C02209 C00936	HMDB0000169			1.4656		1.2942	0.9149	1.1153	0.7226	1.0806	0.9862		Carbohydrate	Fructose, Mannose and Galactose Metabolism	803
	1372	Carbohydrate	Fructose, Mannose and Galactose Metabolism	galactonate	C15930 C00880	HMDB0000565			1.4273		-1.2824			-1.1683		-1.3861		Carbohydrate	Fructose, Mannose and Galactose Metabolism	100001026
	1406	Carbohydrate	Aminosugar Metabolism	glucuronate	C16245	HMDB0000127		-2.574	2.273		0.522	1.1719	1.1955	0.5532	1.1313	0.425		Carbohydrate	Aminosugar Metabolism	100000257
	1418	Carbohydrate	Aminosugar Metabolism	N-acetylneuraminate	C00270	HMDB0000230		-2.1178	1.8474		-0.3013	0.0181	-0.2462	-1.2901	-1.1644	0.2869		Carbohydrate	Aminosugar Metabolism	1162
	1430	Carbohydrate	Aminosugar Metabolism	N-acetylglucosaminylasparagine	C04540	HMDB0000489			1.5654		1.1387	0.9991	1.0351	1.2274	1.3746	1.6331		Carbohydrate	Aminosugar Metabolism	1215
	1431	Carbohydrate	Aminosugar Metabolism	erythronate*		HMDB0000613		-1.8519	1.9372		1.5999	2.0724	1.676	1.3795	0.2986	-0.121		Carbohydrate	Aminosugar Metabolism	100001320
	1433	Carbohydrate	Aminosugar Metabolism	N-acetylglucosamine/N-acetylgalactosamine	C01074	HMDB0000212 HMDB0000215			1.3472		0.1776	0.1478	0.3096	-0.2845	-0.1864	-0.1991		Carbohydrate	Aminosugar Metabolism	100006435
	1439	Energy	TCA Cycle	citrate	C00158	HMDB0000094		-2.7137	1.6848		-0.9782	-0.5543	-1.0085	-0.3207	-0.8657	-0.3113		Energy	TCA Cycle	1124
	1441	Energy	TCA Cycle	aconitate [cis or trans]	C02341 C004174	HMDB0000958 HMDB000072			1.7463		-3.5232	-1.1241	-1.6037	-2.5071	-2.2183	-2.4296		Energy	TCA Cycle	100001359
	1445	Energy	TCA Cycle	alpha-ketoglutarate	C00026	HMDB0000208		-2.4277	2.6475		-0.3068	0.0523	-0.1597	-0.0116	0.4484	0.2998		Energy	TCA Cycle	93
	1447	Energy	TCA Cycle	succinylcarnitine (C4-DC)		HMDB0061717		-2.0376	2.4157		-0.7169	-1.3853	0.2492	-0.0135	-1.5055	0.3144		Energy	TCA Cycle	100001948
	1448	Energy	TCA Cycle	succinate	C00042	HMDB0000254		-2.1607	2.4502		-1.4321	-1.2683	-1.376	-1.7521	-2.179	-1.6156		Energy	TCA Cycle	252
	1449	Energy	TCA Cycle	fumarate	C00122	HMDB0000134		-6.4799	2.2952		-1.0023	-0.9513	-1.2864	-1.2259	-0.633	-1.1556		Energy	TCA Cycle	330
	1451	Energy	TCA Cycle	malate	C00497 C00149 C00711	HMDB0000744 HMDB0031518 HMDB0000156		-1.7219	1.9258		-2.1726	-1.4831	-1.5137	-1.692	-1.0675	-1.6638		Energy	TCA Cycle	409
	1458	Energy	TCA Cycle	2-methylcitrate	C02225	HMDB0000379												Energy	TCA Cycle	90
	1468	Energy	Oxidative Phosphorylation	phosphate	C00009	HMDB0001429		-2.3406	4.0828		-0.4213	-0.8826	-1.1456	-1.297	-0.491	-1.1557		Energy	Oxidative Phosphorylation	461
	1471	Lipid	Fatty Acid Synthesis	malonylcarnitine		HMDB0002095			1.5438									Lipid	Fatty Acid Synthesis	100001526
	1472	Lipid	Fatty Acid Synthesis	malonate	C00383	HMDB0000691			1.7126		-1.1094	0.3006	0.3881	0.2247	-0.107	-0.6265		Lipid	Fatty Acid Synthesis	818
	1489	Lipid	Medium Chain Fatty Acid	caproate (6:0)	C01585	HMDB0000535			1.8913		-0.7166	0.4096	-0.8015	-0.7634	-0.7377	-1.1489		Lipid	Medium Chain Fatty Acid	926
	1491	Lipid	Medium Chain Fatty Acid	caprylate (8:0)	C06423	HMDB0000482			1.8303		1.4087	1.8776	1.2956	1.3971	3.2809	2.2974		Lipid	Medium Chain Fatty Acid	932
	1494	Lipid	Medium Chain Fatty Acid	caprate (10:0)	C01571	HMDB0000511		-1.642	1.7949		1.5613	1.9982	0.8848	1.1048	2.5957	1.6932		Lipid	Medium Chain Fatty Acid	888
	1500	Lipid	Medium Chain Fatty Acid	10-undecenoate (11:1n1)	C13910	HMDB0033724		-2.0374	1.6249		-0.8817	-0.1457	-0.9912	-1.5671	-2.3149	-1.5387		Lipid	Medium Chain Fatty Acid	100001197
	1502	Lipid	Medium Chain Fatty Acid	laurate (12:0)	C02679	HMDB0000638		-1.5615	1.8343		-0.644	-0.0604	-1.3423	-1.5604	0.0066	-1.1121		Lipid	Medium Chain Fatty Acid	181
	1504	Lipid	Medium Chain Fatty Acid	5-dodecenoate (12:1n7)		HMDB0000529		-2.1289	1.9528		-0.1816	0.7423	-2.8396	-2.4149	-1.5565	-2.9434		Lipid	Medium Chain Fatty Acid	100001232
	1507	Lipid	Long Chain Saturated Fatty Acid	myristate (14:0)	C06424	HMDB0000806		-1.7337	1.7493		-0.8814	0.1638	-1.4044	-1.585	-1.7559	-2.0562		Lipid	Long Chain Saturated Fatty Acid	519
	1510	Lipid	Long Chain Saturated Fatty Acid	palmitate (16:0)	C00249	HMDB0000220		-2.0568	1.6058		-1.1414	0.0806	-1.1953	-1.351	-1.4468	-1.939		Lipid	Long Chain Saturated Fatty Acid	424
	1512	Lipid	Long Chain Saturated Fatty Acid	margarate (17:0)		HMDB0002259		-1.715	2.2014		-1.2669	0.0012	-1.1444	-1.4898	-1.6442	-1.8933		Lipid	Long Chain Saturated Fatty Acid	891
	1514	Lipid	Long Chain Saturated Fatty Acid	stearate (18:0)	C01530	HMDB0000827		-1.7843	1.9167		-1.0232	0.0628	-0.4404	-0.9099	-0.9278	-1.3969		Lipid	Long Chain Saturated Fatty Acid	439
	1516	Lipid	Long Chain Saturated Fatty Acid	nonadecanoate (19:0)	C16535	HMDB0000772		-1.6231	2.2224		-1.1834	-0.224	-1.1496	-1.4954	-1.4247	-1.975		Lipid	Long Chain Saturated Fatty Acid	892
	1517	Lipid	Long Chain Saturated Fatty Acid	arachidate (20:0)	C06425	HMDB0002212		-1.6018	2.2782		-1.2533	0.3272	-0.651	-1.1304	-0.9206	-1.6577		Lipid	Long Chain Saturated Fatty Acid	893
	1519	Lipid	Long Chain Saturated Fatty Acid	behenate (22:0)*	C08281	HMDB0000944		-1.704	2.7368		-0.3356	1.9307	-0.0466	1.0162	0.2923	0.4913		Lipid	Long Chain Saturated Fatty Acid	314
	1526	Lipid	Long Chain Monounsaturated Fatty Acid	myristoleate (14:1n5)	C08322	HMDB0002000		-1.9781	1.6802		-0.2273	0.7007	-1.8301	-1.8825	-2.3783	-2.1326		Lipid	Long Chain Monounsaturated Fatty Acid	100001198
	1529	Lipid	Long Chain Monounsaturated Fatty Acid	palmitoleate (16:1n7)	C08362	HMDB0003229		-1.6733	1.8706		-0.2052	0.7403	-1.3238	-1.4642	-1.6572	-1.8917		Lipid	Long Chain Monounsaturated Fatty Acid	452
	1531	Lipid	Long Chain Monounsaturated Fatty Acid	10-heptadecenoate (17:1n7)		HMDB0060038		-1.8404	1.9291		-0.5726	0.4047	-1.3534	-1.2596	-1.4569	-1.5751		Lipid	Long Chain Monounsaturated Fatty Acid	100001278
	1533	Lipid	Long Chain Monounsaturated Fatty Acid	oleate/vaccenate (18:1)	C01712 C08367 C00712 C21944	HMDB0000207 HMDB0000573 HMDB0003231 HMDB0240219		-2.0506	1.5578		-0.1922	0.9883	-1.3307	-1.516	-1.7613	-2.2376		Lipid	Long Chain Monounsaturated Fatty Acid	100008930
	1540	Lipid	Long Chain Monounsaturated Fatty Acid	10-nonadecenoate (19:1n9)		HMDB0013622		-1.8309	1.9099		-0.9089	0.2671	-1.2961	-1.4218	-1.7232	-2.0586		Lipid	Long Chain Monounsaturated Fatty Acid	100001277
	1543	Lipid	Long Chain Monounsaturated Fatty Acid	eicosenoate (20:1)	C16526	HMDB0002231 HMDB0062436		-1.7606	1.9476		-0.3424	1.12	-1.3822	-1.8343	-2.0319	-2.5575		Lipid	Long Chain Monounsaturated Fatty Acid	100001335
	1547	Lipid	Long Chain Monounsaturated Fatty Acid	erucate (22:1n9)	C08316	HMDB0002068		-1.7377	2.0587		-1.4269	-0.0777	-1.5566	-2.2333	-2.1059	-2.7434		Lipid	Long Chain Monounsaturated Fatty Acid	1087
	1549	Lipid	Long Chain Monounsaturated Fatty Acid	nervonate (24:1n9)*	C08323	HMDB0002368		-2.1371	1.8041									Lipid	Long Chain Monounsaturated Fatty Acid	100001231
	1557	Lipid	Long Chain Polyunsaturated Fatty Acid (n3 and n6)	stearidonate (18:4n3)	C16300	HMDB0006547			1.818		0.4569	0.8585	-0.7396	-0.83	-0.1411	-0.9285		Lipid	Long Chain Polyunsaturated Fatty Acid (n3 and n6)	100001229
	1560	Lipid	Long Chain Polyunsaturated Fatty Acid (n3 and n6)	eicosapentaenoate (EPA; 20:5n3)	C06428	HMDB0001999		-1.8228	1.998		0.0517	0.6555	0.1973	-0.5863	-0.2538	-0.6597		Lipid	Long Chain Polyunsaturated Fatty Acid (n3 and n6)	2050
	1562	Lipid	Long Chain Polyunsaturated Fatty Acid (n3 and n6)	docosapentaenoate (n3 DPA; 22:5n3)	C16513	HMDB0001976 HMDB0006528		-1.8782	2.0313		-0.8657	0.1581	-0.5024	-1.2641	-1.5836	-2.2149		Lipid	Long Chain Polyunsaturated Fatty Acid (n3 and n6)	100001181
	1563	Lipid	Long Chain Polyunsaturated Fatty Acid (n3 and n6)	docosahexaenoate (DHA; 22:6n3)	C06429	HMDB0002183		-2.048	1.8509		-1.0783	-0.0132	-1.338	-2.3503	-1.0497	-1.9226		Lipid	Long Chain Polyunsaturated Fatty Acid (n3 and n6)	100000665
	1566	Lipid	Long Chain Polyunsaturated Fatty Acid (n3 and n6)	hexadecadienoate (16:2n6)		HMDB0000477		-2.2371	1.7881		-0.2439	0.6207	-2.2692	-2.183	-2.4656	-2.3436		Lipid	Long Chain Polyunsaturated Fatty Acid (n3 and n6)	100009394
	1567	Lipid	Long Chain Polyunsaturated Fatty Acid (n3 and n6)	linoleate (18:2n6)	C01595	HMDB0000673 HMDB0006270		-1.9797	1.582		-0.0245	1.1518	-1.0841	-1.2665	-1.4256	-1.9326		Lipid	Long Chain Polyunsaturated Fatty Acid (n3 and n6)	180
	1569	Lipid	Long Chain Polyunsaturated Fatty Acid (n3 and n6)	linolenate [alpha or gamma; (18:3n3 or 6)]	C06426 C06427	HMDB0001388 HMDB0003073		-1.9358	1.6907		0.4705	1.458	-0.9952	-0.9667	-0.8004	-1.2637		Lipid	Long Chain Polyunsaturated Fatty Acid (n3 and n6)	100001337
	1570	Lipid	Long Chain Polyunsaturated Fatty Acid (n3 and n6)	dihomo-linoleate (20:2n6)	C16525	HMDB0005060		-1.7498	2.0779		-0.9509	0.4284	-1.4551	-2.059	-2.1529	-2.7959		Lipid	Long Chain Polyunsaturated Fatty Acid (n3 and n6)	1231
	1572	Lipid	Long Chain Polyunsaturated Fatty Acid (n3 and n6)	dihomo-linolenate (20:3n3 or n6)	C03242	HMDB0002925		-2.1522	1.9093		-0.8132	0.5591	0.432	-0.8935	-1.2509	-2.4487		Lipid	Long Chain Polyunsaturated Fatty Acid (n3 and n6)	100001739
	1573	Lipid	Long Chain Polyunsaturated Fatty Acid (n3 and n6)	arachidonate (20:4n6)	C00219	HMDB0001043		-2.0457	2.0045		-1.2352	-0.0318	0.0267	-1.5157	-2.0754	-3.2301		Lipid	Long Chain Polyunsaturated Fatty Acid (n3 and n6)	229
	1575	Lipid	Long Chain Polyunsaturated Fatty Acid (n3 and n6)	adrenate (22:4n6)	C16527	HMDB0002226			1.7368		-2.4188	-0.5721	-1.8574	-2.5921	-2.2017			Lipid	Long Chain Polyunsaturated Fatty Acid (n3 and n6)	100001193
	1576	Lipid	Long Chain Polyunsaturated Fatty Acid (n3 and n6)	docosapentaenoate (n6 DPA; 22:5n6)	C16513	HMDB0001976		-2.0654	1.8813		-1.3928	-0.3271	-0.6706	-1.7369	-1.6122	-2.3623		Lipid	Long Chain Polyunsaturated Fatty Acid (n3 and n6)	100001580
	1577	Lipid	Long Chain Polyunsaturated Fatty Acid (n3 and n6)	docosadienoate (22:2n6)	C16533	HMDB0061714		-1.926	2.1384		-1.1538	-0.0091	-1.4695	-2.0614	-1.7719	-2.3677		Lipid	Long Chain Polyunsaturated Fatty Acid (n3 and n6)	100001182
	1642	Lipid	Fatty Acid, Branched	(14 or 15)-methylpalmitate (a17:0 or i17:0)	C16995	HMDB0061859			1.6203		-0.4308	0.171	-0.3614	-0.4497	-0.5444	-0.8705		Lipid	Fatty Acid, Branched	100002945
	1648	Lipid	Fatty Acid, Branched	(16 or 17)-methylstearate (a19:0 or i19:0)		HMDB0037397		-1.8013	1.9532		-1.3149	-0.4183	-0.987	-1.2316	-1.3773	-1.8993		Lipid	Fatty Acid, Branched	100002356
	1652	Lipid	Fatty Acid, Branched	pristanate		HMDB0000795												Lipid	Fatty Acid, Branched	477
	1659	Lipid	Fatty Acid, Dicarboxylate	glutarate (C5-DC)	C00489	HMDB0000661			1.8266		1.4631	1.7764	2.1646	1.1792	-0.1423	-1.744		Lipid	Fatty Acid, Dicarboxylate	339
	1663	Lipid	Fatty Acid, Dicarboxylate	2-hydroxyglutarate	C02630	HMDB0059655		-1.9713	2.263		0.3811	-1.8674	-1.3013	-0.0766				Lipid	Fatty Acid, Dicarboxylate	100002070
	1664	Lipid	Fatty Acid, Dicarboxylate	4-hydroxy-2-oxoglutaric acid	C01127	HMDB0002070			1.5458		1.4226	0.9033	1.0673	1.6669	1.4489	1.3142		Lipid	Fatty Acid, Dicarboxylate	100002537
	1665	Lipid	Fatty Acid, Dicarboxylate	adipate (C6-DC)	C06104	HMDB0000448			1.7993									Lipid	Fatty Acid, Dicarboxylate	100000863
	1671	Lipid	Fatty Acid, Dicarboxylate	maleate	C01384	HMDB0000176			2.4238		-0.8248	-0.4617	-0.3074	-1.1643	0.6401	-0.8953		Lipid	Fatty Acid, Dicarboxylate	100000707
	1676	Lipid	Fatty Acid, Dicarboxylate	suberate (C8-DC)	C08278	HMDB0000893			2.0053									Lipid	Fatty Acid, Dicarboxylate	100000016
	1679	Lipid	Fatty Acid, Dicarboxylate	azelate (C9-DC)	C08261	HMDB0000784		-1.9168	2.2398		-0.6536	0.3145	-0.5374	-1.1311	-0.5557	-0.7401		Lipid	Fatty Acid, Dicarboxylate	2029
	1681	Lipid	Fatty Acid, Dicarboxylate	sebacate (C10-DC)	C08277	HMDB0000792			2.2159		0.3178	1.1442	-0.5707	0.0272	5.7247	0.7566		Lipid	Fatty Acid, Dicarboxylate	100001211
	1686	Lipid	Fatty Acid, Dicarboxylate	dodecanedioate (C12-DC)	C02678	HMDB0000623		-1.5823	2.4788		-1.3902	-0.41	-1.2704	-1.7078	4.6656	-0.4936		Lipid	Fatty Acid, Dicarboxylate	100001102
	1691	Lipid	Fatty Acid, Dicarboxylate	tetradecanedioate (C14-DC)		HMDB0000872		-1.9551	2.2661		-1.1949	-0.4848	-0.9016	-1.2082	0.5483	-1.4342		Lipid	Fatty Acid, Dicarboxylate	100001613
	1695	Lipid	Fatty Acid, Dicarboxylate	hexadecanedioate (C16-DC)	C19615	HMDB0000672		-1.7199	2.1443		-1.1887	-0.5604	-1.0983	-1.0092	-0.3695	-1.5746		Lipid	Fatty Acid, Dicarboxylate	100001614
	1698	Lipid	Fatty Acid, Dicarboxylate	octadecanedioate (C18-DC)		HMDB0000782		-2.0667	2.3171		-3.752	-2.3241	-3.324	-3.9166	-3.7426	-4.5306		Lipid	Fatty Acid, Dicarboxylate	100001615
	1702	Lipid	Fatty Acid, Dicarboxylate	eicosanedioate (C20-DC)					1.5981		-1.192	-0.9991	-1.0713	-1.3359	-1.4733	-1.3113		Lipid	Fatty Acid, Dicarboxylate	100002951
	1704	Lipid	Fatty Acid, Dicarboxylate	docosadioate (C22-DC)	C14240	HMDB0061714		-1.7378	2.2262		-1.0474	-0.945	-0.8588	-1.0225	-0.344	-1.1814		Lipid	Fatty Acid, Dicarboxylate	100002952
	1705	Lipid	Fatty Acid, Dicarboxylate	3-carboxy-4-methyl-5-propyl-2-furanpropanoate (CMPF)		HMDB0061112		-1.5064	2.4405		1.7453	1.7366	0.4705	0.301	2.2559	2.2371		Lipid	Fatty Acid, Dicarboxylate	100001178
	1750	Lipid	Fatty Acid, Amino	2-aminoheptanoate		HMDB0094649		-1.9742	2.1458		-0.985	-0.5191	-1.4364	-0.855	0.2705	0.2153		Lipid	Fatty Acid, Amino	100004542
	1755	Lipid	Fatty Acid, Amino	2-aminooctanoate		HMDB0000991		-2.2713	1.7769		0.0214	0.4593	-0.413	-0.3194	-0.0865	0.2619		Lipid	Fatty Acid, Amino	100004227
	1768	Lipid	Fatty Acid Metabolism (also BCAA Metabolism)	butyrylcarnitine (C4)	C02862	HMDB0002013			2.2597		-0.1492	1.0125	0.4815	0.2532	1.7415	0.9275		Lipid	Fatty Acid Metabolism (also BCAA Metabolism)	100001054
	1769	Lipid	Fatty Acid Metabolism (also BCAA Metabolism)	butyrylglycine		HMDB0000808												Lipid	Fatty Acid Metabolism (also BCAA Metabolism)	100001151
	1771	Lipid	Fatty Acid Metabolism (also BCAA Metabolism)	propionylcarnitine (C3)	C03017	HMDB0000824		-2.1233	1.942		-0.6338	0.4226	0.7208	0.3711	0.7524	0.2939		Lipid	Fatty Acid Metabolism (also BCAA Metabolism)	100001162
	1772	Lipid	Fatty Acid Metabolism (also BCAA Metabolism)	propionylglycine		HMDB0000783			1.5371		1.0216		1.0491	1.0456	1.1391	0.9892		Lipid	Fatty Acid Metabolism (also BCAA Metabolism)	100001150
	1774	Lipid	Fatty Acid Metabolism (also BCAA Metabolism)	methylmalonate (MMA)	C02170	HMDB0000202			1.8264		-0.5186	-0.1374	0.2032	-0.24	-0.1149	-0.2396		Lipid	Fatty Acid Metabolism (also BCAA Metabolism)	418
	1781	Lipid	Fatty Acid Metabolism (Acyl Glutamine)	hexanoylglutamine					1.8447		-1.0049	0.2025	-0.865	-0.474	1.2977	-0.4879		Lipid	Fatty Acid Metabolism (Acyl Glutamine)	100001733
	1823	Lipid	Fatty Acid Metabolism (Acyl Glycine)	N-palmitoylglycine		HMDB0013034		-1.8272	2.0783		-3.1383	-1.379	-1.5008	-1.8497	-2.1391	-2.6127		Lipid	Fatty Acid Metabolism (Acyl Glycine)	100003686
	1840	Lipid	Fatty Acid Metabolism (Acyl Carnitine, Short Chain)	acetylcarnitine (C2)	C02571	HMDB0000201		-2.1405	1.8847		-0.6818	0.947	-0.6859	-0.4568	0.5595	-0.0468		Lipid	Fatty Acid Metabolism (Acyl Carnitine, Short Chain)	100000802
	1844	Lipid	Fatty Acid Metabolism (Acyl Carnitine, Medium Chain)	hexanoylcarnitine (C6)		HMDB0000756		-1.9391	1.6994		-0.1163	1.3785	-0.6068	-0.1409	1.3566	0.2632		Lipid	Fatty Acid Metabolism (Acyl Carnitine, Medium Chain)	100000781
	1852	Lipid	Fatty Acid Metabolism (Acyl Carnitine, Medium Chain)	octanoylcarnitine (C8)	C02838	HMDB0000791		-2.162	1.7609		-0.1816	1.0332	-1.1957	-0.5093	-0.4461	-1.0827		Lipid	Fatty Acid Metabolism (Acyl Carnitine, Medium Chain)	100001247
	1860	Lipid	Fatty Acid Metabolism (Acyl Carnitine, Medium Chain)	decanoylcarnitine (C10)		HMDB0000651		-2.2673	1.6795		-0.1279	1.2196	-1.0571	-0.4624	-0.2872	-1.1242		Lipid	Fatty Acid Metabolism (Acyl Carnitine, Medium Chain)	100001251
	1861	Lipid	Fatty Acid Metabolism (Acyl Carnitine, Medium Chain)	laurylcarnitine (C12)		HMDB000225		-2.21	1.7101		-1.0663	0.4348	-1.4156	-1.0186	-0.7721	-1.3049		Lipid	Fatty Acid Metabolism (Acyl Carnitine, Medium Chain)	100001392
	1862	Lipid	Fatty Acid Metabolism (Acyl Carnitine, Long Chain Saturated)	myristoylcarnitine (C14)		HMDB000506		-2.2273	2.0371									Lipid	Fatty Acid Metabolism (Acyl Carnitine, Long Chain Saturated)	100001270
	1864	Lipid	Fatty Acid Metabolism (Acyl Carnitine, Long Chain Saturated)	palmitoylcarnitine (C16)	C02990	HMDB0000222		-1.8928	2.6183		-3.0136	-2.0194	-2.2928	-2.7386	-2.9433	-2.3187		Lipid	Fatty Acid Metabolism (Acyl Carnitine, Long Chain Saturated)	100000776
	1865	Lipid	Fatty Acid Metabolism (Acyl Carnitine, Long Chain Saturated)	margaroylcarnitine (C17)*		HMDB0006210			2.053									Lipid	Fatty Acid Metabolism (Acyl Carnitine, Long Chain Saturated)	100004054
	1866	Lipid	Fatty Acid Metabolism (Acyl Carnitine, Long Chain Saturated)	stearoylcarnitine (C18)		HMDB0000848		-1.9677	2.652		-1.7315	-0.3358	-0.821	-1.0651	-1.568	-0.7317		Lipid	Fatty Acid Metabolism (Acyl Carnitine, Long Chain Saturated)	100001391
	1867	Lipid	Fatty Acid Metabolism (Acyl Carnitine, Long Chain Saturated)	arachidoylcarnitine (C20)*		HMDB0006460			1.9225									Lipid	Fatty Acid Metabolism (Acyl Carnitine, Long Chain Saturated)	100015833
	1868	Lipid	Fatty Acid Metabolism (Acyl Carnitine, Long Chain Saturated)	behenoylcarnitine (C22)*		HMDB0062468			1.7972		-0.1664	0.6863	0.315	0.1243	0.0274	0.1503		Lipid	Fatty Acid Metabolism (Acyl Carnitine, Long Chain Saturated)	100015832
	1869	Lipid	Fatty Acid Metabolism (Acyl Carnitine, Long Chain Saturated)	lignoceroylcarnitine (C24)*				-2.0401	1.8906		-0.7168	-0.1162	-0.2933	-0.4248	-0.7254	-0.9197		Lipid	Fatty Acid Metabolism (Acyl Carnitine, Long Chain Saturated)	100015834
	1870	Lipid	Fatty Acid Metabolism (Acyl Carnitine, Long Chain Saturated)	cerotoylcarnitine (C26)*		HMDB0006347		-2.1135	1.9442		0.5756	0.8795	1.034	1.0116	1.4756	1.28		Lipid	Fatty Acid Metabolism (Acyl Carnitine, Long Chain Saturated)	100015835
	1880	Lipid	Fatty Acid Metabolism (Acyl Carnitine, Monounsaturated)	cis-4-decenoylcarnitine (C10:1)		HMDB0013205		-2.143	1.8546		0.3692	1.4124	-0.5102	0.0361	-1.0216	-0.5736		Lipid	Fatty Acid Metabolism (Acyl Carnitine, Monounsaturated)	100002259
	1884	Lipid	Fatty Acid Metabolism (Acyl Carnitine, Monounsaturated)	myristoleoylcarnitine (C14:1)*		HMDB0240588		-1.9954	2.0719		0.1872	1.8114	-0.6865	-0.1775	-1.3678	-0.7025		Lipid	Fatty Acid Metabolism (Acyl Carnitine, Monounsaturated)	100006051
	1885	Lipid	Fatty Acid Metabolism (Acyl Carnitine, Monounsaturated)	palmitoleoylcarnitine (C16:1)*				-1.8301	2.1629									Lipid	Fatty Acid Metabolism (Acyl Carnitine, Monounsaturated)	100009406
	1886	Lipid	Fatty Acid Metabolism (Acyl Carnitine, Monounsaturated)	oleoylcarnitine (C18:1)		HMDB0005065		-1.9536	2.3683		-1.8301	-0.9034	-2.4372	-2.3812	-2.9304	-2.4591		Lipid	Fatty Acid Metabolism (Acyl Carnitine, Monounsaturated)	100001501
	1887	Lipid	Fatty Acid Metabolism (Acyl Carnitine, Monounsaturated)	eicosenoylcarnitine (C20:1)*				-2.2982	2.2578									Lipid	Fatty Acid Metabolism (Acyl Carnitine, Monounsaturated)	100015838
	1889	Lipid	Fatty Acid Metabolism (Acyl Carnitine, Monounsaturated)	nervonoylcarnitine (C24:1)*					1.6737									Lipid	Fatty Acid Metabolism (Acyl Carnitine, Monounsaturated)	100015846
	1890	Lipid	Fatty Acid Metabolism (Acyl Carnitine, Monounsaturated)	ximenoylcarnitine (C26:1)*				-2.444	1.9062		1.0222	1.779	0.9892	0.3561	0.6836	-0.0701		Lipid	Fatty Acid Metabolism (Acyl Carnitine, Monounsaturated)	100015836
	1891	Lipid	Fatty Acid Metabolism (Acyl Carnitine, Polyunsaturated)	linoleoylcarnitine (C18:2)*		HMDB0006469		-1.8124	2.379		-1.3103	-0.8719	-1.4697	-1.6163	-1.6047	-1.6217		Lipid	Fatty Acid Metabolism (Acyl Carnitine, Polyunsaturated)	100003151
	1892	Lipid	Fatty Acid Metabolism (Acyl Carnitine, Polyunsaturated)	linolenoylcarnitine (C18:3)*					2.0491									Lipid	Fatty Acid Metabolism (Acyl Carnitine, Polyunsaturated)	100015831
	1893	Lipid	Fatty Acid Metabolism (Acyl Carnitine, Polyunsaturated)	dihomo-linoleoylcarnitine (C20:2)*				-1.7427	2.316									Lipid	Fatty Acid Metabolism (Acyl Carnitine, Polyunsaturated)	100015839
	1894	Lipid	Fatty Acid Metabolism (Acyl Carnitine, Polyunsaturated)	arachidonoylcarnitine (C20:4)		HMDB0006455		-1.8691	2.0972									Lipid	Fatty Acid Metabolism (Acyl Carnitine, Polyunsaturated)	100015837
	1895	Lipid	Fatty Acid Metabolism (Acyl Carnitine, Polyunsaturated)	dihomo-linolenoylcarnitine (C20:3n3 or 6)*				-1.7036	2.3089		-1.4363	-1.5223	-0.8142	-1.3447	-1.3468	-1.3795		Lipid	Fatty Acid Metabolism (Acyl Carnitine, Polyunsaturated)	100015840
	1899	Lipid	Fatty Acid Metabolism (Acyl Carnitine, Polyunsaturated)	adrenoylcarnitine (C22:4)*					1.7963									Lipid	Fatty Acid Metabolism (Acyl Carnitine, Polyunsaturated)	100015850
	1900	Lipid	Fatty Acid Metabolism (Acyl Carnitine, Polyunsaturated)	docosapentaenoylcarnitine (C22:5n3)*														Lipid	Fatty Acid Metabolism (Acyl Carnitine, Polyunsaturated)	100015851
	1902	Lipid	Fatty Acid Metabolism (Acyl Carnitine, Polyunsaturated)	docosahexaenoylcarnitine (C22:6)*														Lipid	Fatty Acid Metabolism (Acyl Carnitine, Polyunsaturated)	100015845
	1907	Lipid	Fatty Acid Metabolism (Acyl Carnitine, Dicarboxylate)	adipoylcarnitine (C6-DC)		HMDB0061677		-1.8529	1.9483		-0.7665	0.4983	-1.5545	-1.0785	0.462	-0.0901		Lipid	Fatty Acid Metabolism (Acyl Carnitine, Dicarboxylate)	100006614
	1914	Lipid	Fatty Acid Metabolism (Acyl Carnitine, Dicarboxylate)	pimeloylcarnitine/3-methyladipoylcarnitine (C7-DC)					1.6074									Lipid	Fatty Acid Metabolism (Acyl Carnitine, Dicarboxylate)	100009407
	1915	Lipid	Fatty Acid Metabolism (Acyl Carnitine, Dicarboxylate)	suberoylcarnitine (C8-DC)														Lipid	Fatty Acid Metabolism (Acyl Carnitine, Dicarboxylate)	100006627
	1919	Lipid	Fatty Acid Metabolism (Acyl Carnitine, Hydroxy)	(R)-3-hydroxybutyrylcarnitine		HMDB0013127			1.8896		-0.4998	1.2622		-0.1999	0.4866	-0.5001		Lipid	Fatty Acid Metabolism (Acyl Carnitine, Hydroxy)	100003926
	1920	Lipid	Fatty Acid Metabolism (Acyl Carnitine, Hydroxy)	(S)-3-hydroxybutyrylcarnitine		HMDB0013127		-1.6693	2.225		-0.1365	1.6484	-0.2962	-0.5798	1.4256	-0.2018		Lipid	Fatty Acid Metabolism (Acyl Carnitine, Hydroxy)	100009271
	1931	Lipid	Carnitine Metabolism	deoxycarnitine	C01181	HMDB0001161		-1.9878	2.2844		-1.2261	-1.1496	-1.4712	-1.4849	-2.1877	-1.7237		Lipid	Carnitine Metabolism	100001662
	1932	Lipid	Carnitine Metabolism	carnitine	C00487 C00308	HMDB0000062		-2.6381	1.7108		0.8068	1.2324	1.8273	1.9811	1.7438	1.9026		Lipid	Carnitine Metabolism	100000007
	1938	Lipid	Ketone Bodies	3-hydroxybutyrate (BHBA)	C03197 C01089	HMDB0000011 HMDB0000357 HMDB0000442		-1.4322	2.3286		-0.2014	1.2675	-0.3187	-0.286	1.0371	-0.5798		Lipid	Ketone Bodies	254
	1944	Lipid	Fatty Acid Metabolism (Acyl Choline)	oleoylcholine		HMDB0240596			1.9638									Lipid	Fatty Acid Metabolism (Acyl Choline)	100009331
	1947	Lipid	Fatty Acid Metabolism (Acyl Choline)	dihomo-linolenoyl-choline														Lipid	Fatty Acid Metabolism (Acyl Choline)	100009335
	1948	Lipid	Fatty Acid Metabolism (Acyl Choline)	linoleoylcholine*		HMDB0013213			1.7714									Lipid	Fatty Acid Metabolism (Acyl Choline)	100015760
	1950	Lipid	Fatty Acid Metabolism (Acyl Choline)	stearoylcholine*					1.9609									Lipid	Fatty Acid Metabolism (Acyl Choline)	100015759
	1951	Lipid	Fatty Acid Metabolism (Acyl Choline)	docosahexaenoylcholine														Lipid	Fatty Acid Metabolism (Acyl Choline)	100009333
	1952	Lipid	Fatty Acid Metabolism (Acyl Choline)	arachidonoylcholine		HMDB0240583			1.8719									Lipid	Fatty Acid Metabolism (Acyl Choline)	100009332
	1958	Lipid	Fatty Acid, Monohydroxy	alpha-hydroxycaproate		HMDB0001624			1.5075				0.3335	0.2785	0.016	1.9373		Lipid	Fatty Acid, Monohydroxy	100001723
	1960	Lipid	Fatty Acid, Monohydroxy	2-hydroxyoctanoate		HMDB0002264		-1.9705	2.1293		-0.6175	-0.0554	-0.8773	-0.8958	-0.7771	-1.0971		Lipid	Fatty Acid, Monohydroxy	100000743
	1962	Lipid	Fatty Acid, Monohydroxy	2-hydroxydecanoate		HMDB0094656		-1.673	2.162		1.0869	1.446	0.3776	0.8234	-1.0038	0.1478		Lipid	Fatty Acid, Monohydroxy	100004089
	1968	Lipid	Fatty Acid, Monohydroxy	2-hydroxypalmitate		HMDB0031057		-1.9946	2.0244		-3.0008	-0.8772	-0.2025	-1.7979	-1.3465	-3.6805		Lipid	Fatty Acid, Monohydroxy	100001579
	1971	Lipid	Fatty Acid, Monohydroxy	2-hydroxystearate	C03045 C03042	HMDB0062549			1.6106		-1.312	-0.1125	0.7637	-0.0451	0.1461	-0.9306		Lipid	Fatty Acid, Monohydroxy	1239
	1979	Lipid	Fatty Acid, Monohydroxy	3-hydroxyhexanoate		HMDB0061652 HMDB0010718		-1.9928	2.065		-1.0124	0.3558	-1.3205	-1.7304	-0.4818	-1.7692		Lipid	Fatty Acid, Monohydroxy	100006367
	1980	Lipid	Fatty Acid, Monohydroxy	3-hydroxyoctanoate	C20793	HMDB0001954		-2.0935	1.8327		-0.6453	0.1798	-1.2946	-1.3239	-0.4679	-1.0382		Lipid	Fatty Acid, Monohydroxy	100000773
	1982	Lipid	Fatty Acid, Monohydroxy	3-hydroxydecanoate		HMDB0002203		-1.8741	1.8258		-1.2109	-0.1014	-1.6821	-1.749	-1.5781	-1.3852		Lipid	Fatty Acid, Monohydroxy	100000997
	1984	Lipid	Fatty Acid, Monohydroxy	3-hydroxysebacate		HMDB0000350			1.8716		-1.2892	0.3748	-0.9239	-0.9399	1.2357	-0.8627		Lipid	Fatty Acid, Monohydroxy	100001145
	1985	Lipid	Fatty Acid, Monohydroxy	3-hydroxylaurate		HMDB0000387		-3.2586	1.7942		-3.0666	-0.9266	-3.1003	-3.7415	-3.9264	-3.2992		Lipid	Fatty Acid, Monohydroxy	100001112
	1995	Lipid	Fatty Acid, Monohydroxy	5-hydroxyhexanoate		HMDB0000525 HMDB0000409			1.5722									Lipid	Fatty Acid, Monohydroxy	100001148
	2014	Lipid	Fatty Acid, Monohydroxy	13-HODE + 9-HODE	C14767 C14762	HMDB0004667 HMDB0004670			1.7305									Lipid	Fatty Acid, Monohydroxy	100002196
	2030	Lipid	Fatty Acid, Dihydroxy	12,13-DiHOME	C14829	HMDB0004705												Lipid	Fatty Acid, Dihydroxy	62
	2031	Lipid	Fatty Acid, Dihydroxy	9,10-DiHOME	C14828	HMDB0004704												Lipid	Fatty Acid, Dihydroxy	179
	2159	Lipid	Endocannabinoid	oleoyl ethanolamide		HMDB0002088		-1.9523	1.9318									Lipid	Endocannabinoid	1137
	2162	Lipid	Endocannabinoid	palmitoyl ethanolamide	C16512	HMDB0002100		-1.7887	5.2592									Lipid	Endocannabinoid	1489
	2163	Lipid	Endocannabinoid	stearoyl ethanolamide		HMDB0013078		-1.6745	5.1305		-1.2869	-0.9173	-1.3924	-1.5842	-1.3688	-1.6392		Lipid	Endocannabinoid	100002254
	2172	Lipid	Endocannabinoid	N-oleoyltaurine														Lipid	Endocannabinoid	100003119
	2173	Lipid	Endocannabinoid	N-stearoyltaurine					1.7326									Lipid	Endocannabinoid	100003240
	2174	Lipid	Endocannabinoid	N-palmitoyltaurine					1.5363									Lipid	Endocannabinoid	100003239
	2182	Lipid	Endocannabinoid	linoleoyl ethanolamide		HMDB0012252			1.7792									Lipid	Endocannabinoid	100006726
	2196	Lipid	Endocannabinoid	N-oleoylserine					1.7492									Lipid	Endocannabinoid	100015641
	2198	Lipid	Endocannabinoid	N-palmitoylserine					1.7288									Lipid	Endocannabinoid	100015640
	2201	Lipid	Inositol Metabolism	myo-inositol	C00137	HMDB0000211		-2.5271	1.8157		0.0891	0.851	0.2788	0.059	0.2445	0.2102		Lipid	Inositol Metabolism	363
	2232	Lipid	Phospholipid Metabolism	choline	C00114	HMDB0000097		-2.0673	1.9852		-2.1558	-1.1342	-1.2628	-1.1132	-2.1554	-0.7031		Lipid	Phospholipid Metabolism	1256
	2233	Lipid	Phospholipid Metabolism	choline phosphate	C00588	HMDB0001565		-1.8984	1.9267		-1.9368	-2.3691	-2.3532	-2.7442	-1.4558	0.3622		Lipid	Phospholipid Metabolism	267
	2236	Lipid	Phospholipid Metabolism	glycerophosphorylcholine (GPC)	C00670	HMDB0000086		-2.0078	2.6362		-1.8248	-1.3358	-0.2797	-1.9611	-2.0115	-1.0926		Lipid	Phospholipid Metabolism	100000269
	2238	Lipid	Phospholipid Metabolism	phosphoethanolamine	C00346	HMDB0000224		-2.1738	1.5575		-2.507	-2.6296	-2.2312	-2.9393	-1.9141	-0.2879		Lipid	Phospholipid Metabolism	1026
	2240	Lipid	Phospholipid Metabolism	glycerophosphoethanolamine	C01233	HMDB0000114		-1.8987	2.236		-0.6104	-0.5273	0.0722	-1.3044	-0.9836	-0.254		Lipid	Phospholipid Metabolism	100001620
	2242	Lipid	Phospholipid Metabolism	glycerophosphoinositol*					1.624									Lipid	Phospholipid Metabolism	100001621
	2243	Lipid	Phospholipid Metabolism	trimethylamine N-oxide	C01104	HMDB0000925		-2.5019	2.0028		0.6388	0.0803	1.3053	-0.1623	-0.1259	1.1568		Lipid	Phospholipid Metabolism	100003397
	2259	Lipid	Phosphatidylcholine (PC)	phosphatidylcholine (14:0/14:0, 16:0/12:0)				-2.6326	1.6147		-1.3333	-1.4413	0.9989	-0.2977	2.1704	1.772		Lipid	Phosphatidylcholine (PC)	100009346
	2262	Lipid	Phosphatidylcholine (PC)	1-myristoyl-2-palmitoyl-GPC (14:0/16:0)		HMDB0007869		-2.2385	1.6804		-0.8105	-1.1522	0.8489	-0.1778	0.8691	0.6519		Lipid	Phosphatidylcholine (PC)	100000672
	2263	Lipid	Phosphatidylcholine (PC)	1-myristoyl-2-palmitoleoyl-GPC (14:0/16:1)*		HMDB0007870			1.5145									Lipid	Phosphatidylcholine (PC)	100009150
	2265	Lipid	Phosphatidylcholine (PC)	1-myristoyl-2-linoleoyl-GPC (14:0/18:2)*		HMDB0007874		-2.1133	1.9136		0.3889	-0.085	1.7051	0.8976	1.6595	1.7793		Lipid	Phosphatidylcholine (PC)	100009138
	2266	Lipid	Phosphatidylcholine (PC)	1-myristoyl-2-arachidonoyl-GPC (14:0/20:4)*		HMDB0007883		-2.05	1.887		0.0393	-0.7074	1.2121	0.5959	1.11	1.4165		Lipid	Phosphatidylcholine (PC)	100009139
	2268	Lipid	Phosphatidylcholine (PC)	1-myristoyl-2-docosahexaenoyl-GPC (14:0/22:6)*		HMDB0007892		-2.4537	1.683									Lipid	Phosphatidylcholine (PC)	100009140
	2270	Lipid	Phosphatidylcholine (PC)	phosphatidylcholine (15:0/18:1, 17:0/16:1, 16:0/17:1)*				-1.9648	1.7391		-0.0711	0.054	0.873	0.407	0.3406	-0.0468		Lipid	Phosphatidylcholine (PC)	100009347
	2271	Lipid	Phosphatidylcholine (PC)	1-pentadecanoyl-2-linoleoyl-GPC (15:0/18:2)*		HMDB0007940		-2.1307	1.547		0.4805	0.5215	1.1028	1.1806	0.9556	0.716		Lipid	Phosphatidylcholine (PC)	100009035
	2272	Lipid	Phosphatidylcholine (PC)	1-pentadecanoyl-2-arachidonoyl-GPC (15:0/20:4)*		HMDB0007949		-1.7678	1.6408		-0.3416	-0.3765	0.5056	0.4077	-0.2865	-0.1603		Lipid	Phosphatidylcholine (PC)	100009122
	2273	Lipid	Phosphatidylcholine (PC)	1-pentadecanoyl-2-docosahexaenoyl-GPC (15:0/22:6)*		HMDB0007958		-2.0725	1.7986		0.0131	-0.0247	-0.6885	-0.4429	0.4268	0.6378		Lipid	Phosphatidylcholine (PC)	100009123
	2278	Lipid	Phosphatidylcholine (PC)	1,2-dipalmitoyl-GPC (16:0/16:0)	D03585	HMDB0000564		-1.9204	2.0701		-1.3209	-1.4436	-0.531	-1.7251	-0.4848	0.1802		Lipid	Phosphatidylcholine (PC)	100000657
	2279	Lipid	Phosphatidylcholine (PC)	1-palmitoyl-2-palmitoleoyl-GPC (16:0/16:1)*		HMDB0007969		-1.8656	2.0292		-0.2192	-0.44	1.0993	0.2296	0.4778	0.3551		Lipid	Phosphatidylcholine (PC)	100008984
	2281	Lipid	Phosphatidylcholine (PC)	1-palmitoyl-2-stearoyl-GPC (16:0/18:0)	C03889	HMDB0007970		-1.726	2.6474		0.214	-0.6665	1.2909	-1.3005	0.7341	0.9559		Lipid	Phosphatidylcholine (PC)	100008921
	2283	Lipid	Phosphatidylcholine (PC)	1-palmitoyl-2-oleoyl-GPC (16:0/18:1)	C13875	HMDB0007972		-2.0674	1.9984		-0.581	-0.2417	0.299	-0.1647	-0.1294	-0.5739		Lipid	Phosphatidylcholine (PC)	1539
	2286	Lipid	Phosphatidylcholine (PC)	1-palmitoyl-2-linoleoyl-GPC (16:0/18:2)		HMDB0007973		-2.5182	1.9137		0.1791	0.5707	0.9955	0.7911	1.0448	0.6321		Lipid	Phosphatidylcholine (PC)	1537
	2287	Lipid	Phosphatidylcholine (PC)	1-palmitoyl-2-(hydroxylinoleoyl)-GPC (16:0/18:2(OH))*					2.3013		3.3285	3.3522	2.9419	2.8755	0.5276	0.3632		Lipid	Phosphatidylcholine (PC)	100015689
	2297	Lipid	Phosphatidylcholine (PC)	1-palmitoyl-2-arachidonoyl-GPC (16:0/20:4n6)	C05208	HMDB0007982		-2.2834	1.7982		-1.0666	-0.819	-0.2489	-0.8375	-0.4117	-0.7312		Lipid	Phosphatidylcholine (PC)	100008914
	2298	Lipid	Phosphatidylcholine (PC)	1-palmitoyl-2-eicosapentaenoyl-GPC (16:0/20:5)*		HMDB0007984		-1.8411	1.8048		0.5361	0.2202	0.9046	0.9309	1.6378	1.6651		Lipid	Phosphatidylcholine (PC)	100008989
	2299	Lipid	Phosphatidylcholine (PC)	1-palmitoyl-2-adrenoyl-GPC (16:0/22:4)*		HMDB0007988		-2.0397	1.8546		-1.1301	-0.8941	0.682	0.4271	-0.2838	-0.4237		Lipid	Phosphatidylcholine (PC)	100009143
	2301	Lipid	Phosphatidylcholine (PC)	phosphatidylcholine (16:0/22:5n3, 18:1/20:4)*				-1.9779	1.9587		-0.1447	0.2094	0.8745	0.633	-0.6393	-0.5571		Lipid	Phosphatidylcholine (PC)	100009166
	2303	Lipid	Phosphatidylcholine (PC)	1-palmitoyl-2-docosahexaenoyl-GPC (16:0/22:6)		HMDB0007991		-2.0215	1.7552		-0.3669	0.4422	-1.1189	-1.1062	0.6586	0.8449		Lipid	Phosphatidylcholine (PC)	100008915
	2310	Lipid	Phosphatidylcholine (PC)	1-palmitoleoyl-2-linolenoyl-GPC (16:1/18:3)*		HMDB0008008			1.5923		0.8404	0.7076	1.2187	1.0796	1.1333	1.0242		Lipid	Phosphatidylcholine (PC)	100009345
	2317	Lipid	Phosphatidylcholine (PC)	1-margaroyl-2-linoleoyl-GPC (17:0/18:2)*				-2.3673	1.7403		1.2936	1.6681	1.5565	1.5758	1.4949	1.0167		Lipid	Phosphatidylcholine (PC)	100009037
	2318	Lipid	Phosphatidylcholine (PC)	1-margaroyl-2-arachidonoyl-GPC (17:0/20:4)*				-1.9715	1.7113		-0.254	-0.3159	-0.4997	-0.4318	-0.9384	-0.8202		Lipid	Phosphatidylcholine (PC)	100009124
	2319	Lipid	Phosphatidylcholine (PC)	1-margaroyl-2-docosahexaenoyl-GPC (17:0/22:6)*					1.7924									Lipid	Phosphatidylcholine (PC)	100009125
	2322	Lipid	Phosphatidylcholine (PC)	1-stearoyl-2-oleoyl-GPC (18:0/18:1)		HMDB0008038		-2.1087	2.2588		0.9493	0.4532	1.588	0.4306	1.1643	0.0914		Lipid	Phosphatidylcholine (PC)	100008904
	2325	Lipid	Phosphatidylcholine (PC)	1-stearoyl-2-linoleoyl-GPC (18:0/18:2)*		HMDB0008039		-2.7229	1.8439		1.2051	1.0545	1.193	0.8523	1.3431	0.5542		Lipid	Phosphatidylcholine (PC)	100008980
	2328	Lipid	Phosphatidylcholine (PC)	phosphatidylcholine (18:0/20:2, 20:0/18:2)*				-2.3378	1.987		1.8414	1.0423	2.6835	1.3644	2.731	1.5048		Lipid	Phosphatidylcholine (PC)	100009364
	2329	Lipid	Phosphatidylcholine (PC)	1-stearoyl-2-dihomo-linolenoyl-GPC (18:0/20:3n3 or 6)*		HMDB0008047		-2.2103	1.6302		0.6504	0.8578	1.5759	1.4591	1.3578	0.9666		Lipid	Phosphatidylcholine (PC)	100009051
	2333	Lipid	Phosphatidylcholine (PC)	1-stearoyl-2-arachidonoyl-GPC (18:0/20:4)		HMDB0008048		-2.3211	1.9048		0.1277	0.1807	0.2722	-0.2334	-0.1699	-0.685		Lipid	Phosphatidylcholine (PC)	100001869
	2336	Lipid	Phosphatidylcholine (PC)	1-stearoyl-2-adrenoyl-GPC (18:0/22:4)*		HMDB0008054		-2.1511	1.9529		-1.4383	-0.9543	0.7919	0.4069	-1.1382	-1.2686		Lipid	Phosphatidylcholine (PC)	100009146
	2337	Lipid	Phosphatidylcholine (PC)	1-stearoyl-2-docosapentaenoyl-GPC (18:0/22:5n3)*		HMDB0008056		-2.1243	1.6878		0.2206	0.1198	0.7737	0.5214	0.2953	-0.0147		Lipid	Phosphatidylcholine (PC)	100009141
	2338	Lipid	Phosphatidylcholine (PC)	1-stearoyl-2-docosapentaenoyl-GPC (18:0/22:5n6)*		HMDB0008055		-2.2827	1.7547		-1.6834	-1.2099	-0.6849	-0.6959	-1.1981	-0.8975		Lipid	Phosphatidylcholine (PC)	100009142
	2339	Lipid	Phosphatidylcholine (PC)	1-stearoyl-2-docosahexaenoyl-GPC (18:0/22:6)		HMDB0008057		-1.8611	1.706		0.1253	0.3062	-1.1133	-1.3993	0.6082	0.4513		Lipid	Phosphatidylcholine (PC)	100008916
	2358	Lipid	Phosphatidylcholine (PC)	1-oleoyl-2-docosahexaenoyl-GPC (18:1/22:6)*		HMDB0008123		-2.2118	1.8539		1.4877	2.1769	0.4232	0.0723	1.4588	1.4553		Lipid	Phosphatidylcholine (PC)	100009130
	2359	Lipid	Phosphatidylcholine (PC)	1,2-dilinoleoyl-GPC (18:2/18:2)		HMDB0008138		-2.2381	1.8086		0.7322	1.4466	1.781	1.2782	1.5374	0.8887		Lipid	Phosphatidylcholine (PC)	100008903
	2360	Lipid	Phosphatidylcholine (PC)	1-linoleoyl-2-linolenoyl-GPC (18:2/18:3)*		HMDB0008141		-2.4966	1.9502		1.6148	1.8051	1.9016	1.8319	2.1725	1.5687		Lipid	Phosphatidylcholine (PC)	100009343
	2365	Lipid	Phosphatidylcholine (PC)	1-linoleoyl-2-arachidonoyl-GPC (18:2/20:4n6)*	C05208	HMDB0008147		-2.3881	1.7974		0.2527	0.0401	1.2637	1.1483	0.6593	0.4259		Lipid	Phosphatidylcholine (PC)	100009131
	2369	Lipid	Phosphatidylcholine (PC)	1-linoleoyl-2-docosahexaenoyl-GPC (18:2/22:6)*		HMDB0008156		-2.3791	1.8407		-0.0779	0.6273	0.2722	-0.0513	1.0904	1.2799		Lipid	Phosphatidylcholine (PC)	100009132
	2374	Lipid	Phosphatidylcholine (PC)	1-arachidoyl-2-arachidonoyl-GPC (20:0/20:4)*		HMDB0008279		-2.4362	2.0327		0.4158	-0.1127	0.7082	-0.6296	-0.0324	0.7895		Lipid	Phosphatidylcholine (PC)	100009126
	2408	Lipid	Phosphatidylethanolamine (PE)	1-palmitoyl-2-oleoyl-GPE (16:0/18:1)		HMDB0005320		-1.7447	2.4975		-0.8289	-0.2891	0.2274	-0.6363	-0.9448	-0.0257		Lipid	Phosphatidylethanolamine (PE)	1526
	2410	Lipid	Phosphatidylethanolamine (PE)	1-palmitoyl-2-linoleoyl-GPE (16:0/18:2)		HMDB0005322		-1.9008	1.9492		-0.7334	-0.1478	0.1109	-0.0281	0.0389	-0.2663		Lipid	Phosphatidylethanolamine (PE)	100001870
	2416	Lipid	Phosphatidylethanolamine (PE)	1-palmitoyl-2-arachidonoyl-GPE (16:0/20:4)*	C05210	HMDB0005323		-2.0344	2.3532		-2.5724	-1.7041	-1.5528	-1.7471	-2.3302	-0.9744		Lipid	Phosphatidylethanolamine (PE)	100008990
	2418	Lipid	Phosphatidylethanolamine (PE)	1-palmitoyl-2-docosahexaenoyl-GPE (16:0/22:6)*		HMDB0008946		-2.04	1.7449		-0.8633	0.0589	-1.5204	-1.3835	-0.0829	0.4883		Lipid	Phosphatidylethanolamine (PE)	100008991
	2425	Lipid	Phosphatidylethanolamine (PE)	1-stearoyl-2-oleoyl-GPE (18:0/18:1)		HMDB0008993		-1.9919	2.033		0.1316	0.5302	0.638	0.1822	0.1701	0.4918		Lipid	Phosphatidylethanolamine (PE)	100001856
	2429	Lipid	Phosphatidylethanolamine (PE)	1-stearoyl-2-linoleoyl-GPE (18:0/18:2)*		HMDB0008994		-2.1032	1.9551		0.2111	0.8303	0.8268	0.667	0.5881	0.3908		Lipid	Phosphatidylethanolamine (PE)	100008976
	2434	Lipid	Phosphatidylethanolamine (PE)	1-stearoyl-2-dihomo-linolenoyl-GPE (18:0/20:3n3 or 6)*		HMDB0009002		-2.0984	1.9179		0.4251	0.7397	1.2864	0.9902	0.7786	1.0647		Lipid	Phosphatidylethanolamine (PE)	100009215
	2438	Lipid	Phosphatidylethanolamine (PE)	1-stearoyl-2-arachidonoyl-GPE (18:0/20:4)	C05210	HMDB0009003		-2.0535	2.0169		-1.4789	-0.4332	-0.6046	-1.4143	-1.8067	0.4851		Lipid	Phosphatidylethanolamine (PE)	100008977
	2440	Lipid	Phosphatidylethanolamine (PE)	1-stearoyl-2-docosapentaenoyl-GPE (18:0/22:5n3)*		HMDB0009011			1.6247		-0.5632		0.21			0.8425		Lipid	Phosphatidylethanolamine (PE)	100015592
	2441	Lipid	Phosphatidylethanolamine (PE)	1-stearoyl-2-docosapentaenoyl-GPE (18:0/22:5n6)*		HMDB0009010			1.5954		-0.6077	-0.2288	0.0564	-0.0098	-0.6523	-0.1448		Lipid	Phosphatidylethanolamine (PE)	100015593
	2442	Lipid	Phosphatidylethanolamine (PE)	1-stearoyl-2-docosahexaenoyl-GPE (18:0/22:6)*		HMDB0009012		-2.2786	1.7661		-0.2231	-0.6105	-0.9192	-0.9915	0.4685	0.7473		Lipid	Phosphatidylethanolamine (PE)	100008992
	2444	Lipid	Phosphatidylethanolamine (PE)	1-oleoyl-2-linoleoyl-GPE (18:1/18:2)*		HMDB0005349		-2.1169	1.8157		0.818	1.147	1.0388	0.8905	0.8794	0.5131		Lipid	Phosphatidylethanolamine (PE)	100009078
	2448	Lipid	Phosphatidylethanolamine (PE)	phosphatidylethanolamine (P-18:1/20:4, P-16:0/22:5n3)*		HMDB0011360		-1.9144	2.2034		-0.1384	-0.195	1.1076	0.2998	-0.1876	-0.0039		Lipid	Phosphatidylethanolamine (PE)	100015687
	2505	Lipid	Phosphatidylserine (PS)	1-stearoyl-2-oleoyl-GPS (18:0/18:1)		HMDB0010163		-1.8261	1.9866									Lipid	Phosphatidylserine (PS)	100000639
	2511	Lipid	Phosphatidylserine (PS)	1-stearoyl-2-docosahexaenoyl-GPS (18:0/22:6)*		HMDB0010167												Lipid	Phosphatidylserine (PS)	100001873
	2534	Lipid	Phosphatidylinositol (PI)	1-palmitoyl-2-oleoyl-GPI (16:0/18:1)*		HMDB0009783		-3.6007	1.929		-0.139		1.1122	-0.9854	0.9179	-2.0771		Lipid	Phosphatidylinositol (PI)	100009066
	2536	Lipid	Phosphatidylinositol (PI)	1-palmitoyl-2-linoleoyl-GPI (16:0/18:2)		HMDB0009784		-2.7434	1.8345		0.6188	-1.1574	1.5736	-0.3273	1.7835	-0.9132		Lipid	Phosphatidylinositol (PI)	1528
	2539	Lipid	Phosphatidylinositol (PI)	1-palmitoyl-2-arachidonoyl-GPI (16:0/20:4)*		HMDB0009789		-2.1872	1.8301		-0.4166	0.0643	-0.4823	0.8244	0.8184	0.0241		Lipid	Phosphatidylinositol (PI)	100008993
	2542	Lipid	Phosphatidylinositol (PI)	1-stearoyl-2-oleoyl-GPI (18:0/18:1)*					1.7577		0.5893	0.6108	1.338	0.5683	1.2834	0.3266		Lipid	Phosphatidylinositol (PI)	100009181
	2543	Lipid	Phosphatidylinositol (PI)	1-stearoyl-2-linoleoyl-GPI (18:0/18:2)		HMDB0009809		-2.1814	2.0379		0.3129	0.8766	0.6097	-0.8271	0.1331	0.5472		Lipid	Phosphatidylinositol (PI)	100008994
	2556	Lipid	Phosphatidylinositol (PI)	1-stearoyl-2-arachidonoyl-GPI (18:0/20:4)		HMDB0009815		-2.4556	1.8544		-0.9089	0.3888	0.6209	-0.2907	0.1211	0.1519		Lipid	Phosphatidylinositol (PI)	100000616
	2558	Lipid	Phosphatidylinositol (PI)	1-stearoyl-2-dihomo-linolenoyl-GPI (18:0/20:3n3 or 6)*		HMDB0009814		-2.5386	1.8233		-0.1755	1.1248	1.4321	1.4276	1.2224	0.9896		Lipid	Phosphatidylinositol (PI)	100009184
	2582	Lipid	Lysophospholipid	1-palmitoyl-GPA (16:0)	C04036	HMDB00327			1.7456									Lipid	Lysophospholipid	100001445
	2587	Lipid	Lysophospholipid	1-linoleoyl-GPA (18:2)*		HMDB0007856			1.6445						-2.0992			Lipid	Lysophospholipid	100009082
	2592	Lipid	Lysophospholipid	1-arachidonoyl-GPA (20:4)		HMDB0062312			1.7163									Lipid	Lysophospholipid	100004442
	2595	Lipid	Lysophospholipid	1-myristoyl-GPC (14:0)	C04230	HMDB0010379		-2.1021	1.8899		-1.293	-1.3192	0.5124	-0.3426	0.2198	0.4011		Lipid	Lysophospholipid	100001383
	2596	Lipid	Lysophospholipid	2-myristoyl-GPC (14:0)*		HMDB0010379			1.8061		-1.2756	-1.2751	0.5051	-0.3384	0.3111	0.5032		Lipid	Lysophospholipid	100001563
	2599	Lipid	Lysophospholipid	1-pentadecanoyl-GPC (15:0)*		HMDB0010381		-2.0292	1.6765		-1.2065	-1.0884	0.1561	-0.2448	-0.5291	-0.4177		Lipid	Lysophospholipid	100002173
	2600	Lipid	Lysophospholipid	1-palmitoyl-GPC (16:0)	C04102	HMDB0010382		-2.0265	2.7874		-2.5225	-0.964	-0.418	-1.129	-1.1681	-1.0272		Lipid	Lysophospholipid	100001263
	2601	Lipid	Lysophospholipid	2-palmitoyl-GPC (16:0)*		HMDB0061702		-1.8933	2.6577		-3.2404	-1.6101	-0.8006	-2.2065	-1.5984	-3.2709		Lipid	Lysophospholipid	100001562
	2602	Lipid	Lysophospholipid	1-palmitoleoyl-GPC (16:1)*		HMDB0010383		-2.0083	1.7571		-1.0629	-0.5443	-0.0465	-0.2415	-0.7639	-0.7024		Lipid	Lysophospholipid	100001511
	2606	Lipid	Lysophospholipid	1-margaroyl-GPC (17:0)	C04230	HMDB0012108		-2.0197	1.9553		-1.4688	-0.8737	-0.2439	-0.5827	-0.7808	-0.9395		Lipid	Lysophospholipid	100001264
	2611	Lipid	Lysophospholipid	1-stearoyl-GPC (18:0)		HMDB0010384		-2.211	2.4734		-2.4422	-1.2435	-0.5831	-1.4609	-0.943	-1.3196		Lipid	Lysophospholipid	100001271
	2612	Lipid	Lysophospholipid	2-stearoyl-GPC (18:0)*				-2.1108	2.2172		-3.2159	-0.6208	-0.3187	-1.6337	-1.9817	-0.5397		Lipid	Lysophospholipid	100001555
	2613	Lipid	Lysophospholipid	1-oleoyl-GPC (18:1)	C03916	HMDB0002815		-2.0532	2.1612		-0.8806	-0.0581	0.3689	-0.3563	-0.5413	-0.6471		Lipid	Lysophospholipid	100001272
	2614	Lipid	Lysophospholipid	2-oleoyl-GPC (18:1)*		HMDB0061701		-1.884	2.2405		-1.5423	-0.1261	0.3207	-1.0753	-0.7701	-2.0567		Lipid	Lysophospholipid	100001556
	2616	Lipid	Lysophospholipid	1-linoleoyl-GPC (18:2)	C04100	HMDB0010386		-2.1676	1.8383		-0.3176	0.708	0.9823	0.8519	0.8743	0.7088		Lipid	Lysophospholipid	100001395
	2617	Lipid	Lysophospholipid	2-linoleoyl-GPC (18:2)*				-2.1408	1.9369		-1.0805	0.407	0.8542	-0.0372	0.3341	-1.0332		Lipid	Lysophospholipid	100001557
	2618	Lipid	Lysophospholipid	1-linolenoyl-GPC (18:3)*	C04100	HMDB0010388		-2.0105	1.9999		-0.436	-0.1233	1.3882	0.3054	1.3482	0.7917		Lipid	Lysophospholipid	100005350
	2621	Lipid	Lysophospholipid	1-nonadecanoyl-GPC (19:0)				-2.9608	2.0229		-0.9392	-0.4331	0.0192	-0.2597	-0.2215	-0.3407		Lipid	Lysophospholipid	100005353
	2624	Lipid	Lysophospholipid	1-arachidoyl-GPC (20:0)	C04230	HMDB0010390		-1.9897	2.11		-1.2747	-1.2125	0	-1.2406				Lipid	Lysophospholipid	100001384
	2627	Lipid	Lysophospholipid	1-eicosenoyl-GPC (20:1)*		HMDB0010391		-1.7367	2.5331		-0.4236	0.1363	0.1568	-1.1735	-1.0079	-0.6694		Lipid	Lysophospholipid	100005352
	2629	Lipid	Lysophospholipid	1-dihomo-linoleoyl-GPC (20:2)*		HMDB0010392		-1.9539	2.2514		-0.8619	-0.0859	0.6399	0.0331	-0.2316	-0.4333		Lipid	Lysophospholipid	100001553
	2630	Lipid	Lysophospholipid	1-dihomo-linolenoyl-GPC (20:3n3 or 6)*		HMDB0010394		-1.7295	2.0385		-0.4995	0.0828	1.141	0.6537	0.3329	0.2633		Lipid	Lysophospholipid	100001552
	2633	Lipid	Lysophospholipid	2-arachidonoyl-GPC (20:4)*		HMDB0061699		-1.9637	2.149		-2.6436	-1.3486	-0.3301	-2.6425	-2.3742	-5.3556		Lipid	Lysophospholipid	100001554
	2635	Lipid	Lysophospholipid	1-arachidonoyl-GPC (20:4n6)*	C05208	HMDB0010395		-2.025	1.9612		-1.4035	-0.8756	-0.2494	-0.7338	-1.2994	-1.1998		Lipid	Lysophospholipid	100001551
	2636	Lipid	Lysophospholipid	1-eicosapentaenoyl-GPC (20:5)*				-1.8629	2.0583		0.3074	0.1171	0.8761	0.4918	1.0313	1.178		Lipid	Lysophospholipid	100005351
	2638	Lipid	Lysophospholipid	1-behenoyl-GPC (22:0)		HMDB0010398			1.7646									Lipid	Lysophospholipid	100002868
	2641	Lipid	Lysophospholipid	1-adrenoyl-GPC (22:4)*		HMDB0010401		-1.9064	1.9641		-2.0246	-1.1043	0.3875	-0.1456	-1.9714	-2.1862		Lipid	Lysophospholipid	100002871
	2642	Lipid	Lysophospholipid	1-docosapentaenoyl-GPC (22:5n3)*				-1.9949	1.9242		-0.658	-0.1751	0.6646	0.3206	-0.4679	-0.6042		Lipid	Lysophospholipid	100002063
	2644	Lipid	Lysophospholipid	1-docosapentaenoyl-GPC (22:5n6)*				-2.1962	1.7861		-1.4318	-0.7943	-0.1165	-0.4382	-1.0536	-1.0665		Lipid	Lysophospholipid	100005673
	2645	Lipid	Lysophospholipid	1-docosahexaenoyl-GPC (22:6)*		HMDB0010404		-1.948	1.8559		-0.5104	0.109	-0.7698	-1.2057	0.0801	0.1414		Lipid	Lysophospholipid	100001566
	2646	Lipid	Lysophospholipid	2-docosahexaenoyl-GPC (22:6)*		HMDB0010404			1.6417									Lipid	Lysophospholipid	100001565
	2649	Lipid	Lysophospholipid	1-lignoceroyl-GPC (24:0)		HMDB0010405			1.6921									Lipid	Lysophospholipid	100002873
	2662	Lipid	Lysophospholipid	1-palmitoyl-GPE (16:0)		HMDB0011503		-2.0113	2.0361		-1.3694	-0.348	0.003	-0.7923	0.3403	0.1624		Lipid	Lysophospholipid	100001567
	2663	Lipid	Lysophospholipid	2-palmitoyl-GPE (16:0)*		HMDB11503		-3.9111	2.0266		-2.3771	-0.7183	-0.4355	-1.9212	-0.7557	-1.7268		Lipid	Lysophospholipid	100001652
	2668	Lipid	Lysophospholipid	1-margaroyl-GPE (17:0)*		HMDB0061691			1.721			-0.612	-0.2868		-0.7484			Lipid	Lysophospholipid	100002171
	2669	Lipid	Lysophospholipid	1-stearoyl-GPE (18:0)		HMDB0011130		-1.9989	2.4972		-2.0965	-0.7506	-0.4506	-1.222	-0.9195	-0.5308		Lipid	Lysophospholipid	100001461
	2670	Lipid	Lysophospholipid	2-stearoyl-GPE (18:0)*		HMDB0011129		-2.4037	2.1248		-2.0028	-0.7194	-0.4107	-1.2994	-0.9112	-1.7038		Lipid	Lysophospholipid	100003901
	2671	Lipid	Lysophospholipid	1-oleoyl-GPE (18:1)		HMDB0011506		-2.1461	1.8847		0.2524	0.7689	0.7986	0.5793	0.5226	0.2735		Lipid	Lysophospholipid	100001569
	2672	Lipid	Lysophospholipid	2-oleoyl-GPE (18:1)*		HMDB11476		-2.1282	2.007		-0.6957	0.5818	0.4633	-0.3075	-0.1856	-1.5087		Lipid	Lysophospholipid	100001651
	2673	Lipid	Lysophospholipid	1-linoleoyl-GPE (18:2)*		HMDB0011507		-2.178	1.9033		0.1578	0.9061	1.2632	1.0248	1.2167	0.8265		Lipid	Lysophospholipid	100001570
	2674	Lipid	Lysophospholipid	2-linoleoyl-GPE (18:2)*		HMDB11477		-2.1157	2.0452		-0.8612	0.8261	0.6198	0.1959	0.4461	-0.5961		Lipid	Lysophospholipid	100001776
	2675	Lipid	Lysophospholipid	1-linolenoyl-GPE (18:3)*		HMDB0011509 HMDB0011479			1.8286		0.3281	0.7086	1.0081	0.88	1.4712	0.9559		Lipid	Lysophospholipid	100005714
	2683	Lipid	Lysophospholipid	1-dihomo-linolenoyl-GPE (20:3n3 or 6)*				-2.2149	1.9692		-0.2175	0.7228	1.574	0.6676	0.757	-0.5314		Lipid	Lysophospholipid	100005371
	2686	Lipid	Lysophospholipid	1-arachidonoyl-GPE (20:4n6)*		HMDB0011517		-2.0559	2.0025		-1.3527	-0.1674	-0.0886	-0.5451	-0.7471	-0.6631		Lipid	Lysophospholipid	100001571
	2687	Lipid	Lysophospholipid	2-arachidonoyl-GPE (20:4)*		HMDB0011487		-1.9654	2.1472		-6.9783	-0.4866	-0.0052	-0.7643	-0.4287	-1.5022		Lipid	Lysophospholipid	100001674
	2697	Lipid	Lysophospholipid	1-docosahexaenoyl-GPE (22:6)*		HMDB11496		-2.0076	1.7905		-0.2398	0.5512	-1.0717	-1.2417	0.7861	0.6074		Lipid	Lysophospholipid	100002060
	2698	Lipid	Lysophospholipid	2-docosahexaenoyl-GPE (22:6)*		HMDB0011496			1.7479									Lipid	Lysophospholipid	100002061
	2708	Lipid	Lysophospholipid	1-palmitoyl-GPG (16:0)*					2.0105									Lipid	Lysophospholipid	100005717
	2713	Lipid	Lysophospholipid	1-oleoyl-GPG (18:1)*														Lipid	Lysophospholipid	100005716
	2715	Lipid	Lysophospholipid	1-linoleoyl-GPG (18:2)*				-2.3802	2.0235		0.1117	1.1558	0.6773	0.5931	0.7193	-0.3314		Lipid	Lysophospholipid	100009227
	2717	Lipid	Lysophospholipid	1-palmitoyl-GPI (16:0)		HMDB0061695			2.3049									Lipid	Lysophospholipid	100001655
	2721	Lipid	Lysophospholipid	1-stearoyl-GPI (18:0)		HMDB0240261		-1.6071	2.4427		-0.8804	0.5382	1.9348	0.6404	0.3899	-1.0235		Lipid	Lysophospholipid	100000656
	2722	Lipid	Lysophospholipid	2-stearoyl-GPI (18:0)*					1.8029		-0.3301	0.8499	1.5767	0.8358	0.8029	-0.0027		Lipid	Lysophospholipid	100003008
	2723	Lipid	Lysophospholipid	1-oleoyl-GPI (18:1)		HMDB0061693			1.8796		0.0068	0.4409	1.3258	0.4045	0.57	-1.1107		Lipid	Lysophospholipid	100001777
	2725	Lipid	Lysophospholipid	1-linoleoyl-GPI (18:2)*				-1.9966	2.0537									Lipid	Lysophospholipid	100001778
	2731	Lipid	Lysophospholipid	1-arachidonoyl-GPI (20:4)*		HMDB0061690		-1.8426	2.1504									Lipid	Lysophospholipid	100001654
	2789	Lipid	Plasmalogen	1-palmityl-2-palmitoyl-GPC (O-16:0/16:0)*				-2.0537	2.0272		-1.9956	-1.0827	0.7607	-0.3157	-0.1721	-0.9156		Lipid	Plasmalogen	100015586
	2790	Lipid	Plasmalogen	1-palmityl-2-stearoyl-GPC (O-16:0/18:0)*		HMDB0013405		-2.1003	2.2228		-1.7765	-0.8376	0.0953	-0.5356	-0.9417	-0.073		Lipid	Plasmalogen	100010966
	2791	Lipid	Plasmalogen	1-palmityl-2-oleoyl-GPC (O-16:0/18:1)*				-2.0991	1.8265		1.2954	1.3609	1.9805	1.0728	1.5228	0.7262		Lipid	Plasmalogen	100009020
	2792	Lipid	Plasmalogen	1-palmityl-2-linoleoyl-GPC (O-16:0/18:2)*		HMDB0011151		-1.8037	2.1609		-0.5818	-0.4237	0.8754	0.7587	0.8001	0.0299		Lipid	Plasmalogen	100009134
	2794	Lipid	Plasmalogen	1-palmityl-2-arachidonoyl-GPC (O-16:0/20:4)*		HMDB0007982		-2.0933	2.0172		-4.0678	-6.6682	-1.8379	-3.3472	-3.2466	-4.1346		Lipid	Plasmalogen	100009021
	2795	Lipid	Plasmalogen	1-stearyl-2-arachidonoyl-GPC (O-18:0/20:4)*				-2.121	1.9617		-2.8791	-3.7922	-1.2427	-2.7317	-2.1715	-3.0766		Lipid	Plasmalogen	100009019
	2796	Lipid	Plasmalogen	1-stearyl-2-docosapentaenoyl-GPC (O-18:0/22:5n3)*				-2.1519	1.9749		-2.2752	-0.8327	-1.097	-1.1098	-1.3996	-2.0123		Lipid	Plasmalogen	100015587
	2797	Lipid	Plasmalogen	1-(1-enyl-oleoyl)-2-docosahexaenoyl-GPE (P-18:1/22:6)*		HMDB0011460		-2.5805	1.5644		-0.1261	0.1617	-0.887	-0.8451	0.0164	0.4319		Lipid	Plasmalogen	100009376
	2798	Lipid	Plasmalogen	1-(1-enyl-palmitoyl)-2-docosahexaenoyl-GPC (P-16:0/22:6)*		HMDB0011229		-1.9937	1.6704		-0.7175	-0.579	-0.8131	-1.1934	0.6091	0.5317		Lipid	Plasmalogen	100009008
	2800	Lipid	Plasmalogen	1-(1-enyl-palmitoyl)-2-oleoyl-GPE (P-16:0/18:1)*		HMDB0011342		-1.8954	2.2936		0.7171	-0.1024	1.5051	0.7462	0.1586	0.2887		Lipid	Plasmalogen	100009005
	2801	Lipid	Plasmalogen	1-(1-enyl-palmitoyl)-2-linoleoyl-GPE (P-16:0/18:2)*		HMDB0011343		-1.9523	2.1335		0.8361	-0.1956	1.3258	0.5908	1.3625	0.2883		Lipid	Plasmalogen	100009069
	2802	Lipid	Plasmalogen	1-(1-enyl-palmitoyl)-2-palmitoyl-GPC (P-16:0/16:0)*		HMDB0011206		-2.0459	1.8923		-1.7682	-1.2205	-0.2154	-0.6161	-0.0508	-0.981		Lipid	Plasmalogen	100009162
	2803	Lipid	Plasmalogen	1-(1-enyl-palmitoyl)-2-palmitoleoyl-GPC (P-16:0/16:1)*		HMDB0011207		-2.0926	1.8439		-0.2176	0.5199	0.3526	0.1717	0.0758	-0.3261		Lipid	Plasmalogen	100009160
	2804	Lipid	Plasmalogen	1-(1-enyl-palmitoyl)-2-arachidonoyl-GPE (P-16:0/20:4)*		HMDB0011352		-1.9524	2.064		-0.718	-1.1044	0.5151	-0.1991	-0.5675	-0.0545		Lipid	Plasmalogen	100009002
	2805	Lipid	Plasmalogen	1-(1-enyl-palmitoyl)-2-docosahexaenoyl-GPE (P-16:0/22:6)*		HMDB0005780		-1.775	1.7245		-0.817	-0.7299	-1.1139	-1.1465	-0.2793	0.1878		Lipid	Plasmalogen	100009000
	2806	Lipid	Plasmalogen	1-(1-enyl-palmitoyl)-2-oleoyl-GPC (P-16:0/18:1)*		HMDB0007996		-2.1191	1.9977		-0.358	-0.2229	0.2288	-0.1347	0.5174	-0.2514		Lipid	Plasmalogen	100009007
	2809	Lipid	Plasmalogen	1-(1-enyl-stearoyl)-2-oleoyl-GPE (P-18:0/18:1)		HMDB0011375		-2.2043	2.177		-0.7281	-0.9831	0.623	-0.0907	-0.3627	-0.2614		Lipid	Plasmalogen	100008919
	2810	Lipid	Plasmalogen	1-(1-enyl-stearoyl)-2-linoleoyl-GPE (P-18:0/18:2)*		HMDB0011376		-2.0387	1.9204		-0.1495	-0.1141	0.6696	0.6505	0.4895	0.8099		Lipid	Plasmalogen	100009225
	2813	Lipid	Plasmalogen	1-(1-enyl-palmitoyl)-2-arachidonoyl-GPC (P-16:0/20:4)*		HMDB0011220		-1.8863	1.9111		-2.3308	-2.2664	-0.9068	-1.0021	-1.6458	-1.7575		Lipid	Plasmalogen	100009014
	2814	Lipid	Plasmalogen	1-(1-enyl-palmitoyl)-2-linoleoyl-GPC (P-16:0/18:2)*		HMDB0011211		-2.0971	2.0125		-0.396	-0.3321	0.6095	0.315	0.6746	0.0018		Lipid	Plasmalogen	100009009
	2815	Lipid	Plasmalogen	1-(1-enyl-palmitoyl)-2-myristoyl-GPC (P-16:0/14:0)*		HMDB0011203			1.5489		-1.4158	-1.3686	-0.5167	-0.3276	-0.2193	-0.7006		Lipid	Plasmalogen	100009161
	2816	Lipid	Plasmalogen	1-(1-enyl-stearoyl)-2-arachidonoyl-GPC (P-18:0/20:4)		HMDB0011253		-2.1847	1.8397		-2.0309	-2.3236	-0.9358	-1.0086	-1.6582	-1.7986		Lipid	Plasmalogen	100008918
	2818	Lipid	Plasmalogen	1-(1-enyl-stearoyl)-2-arachidonoyl-GPE (P-18:0/20:4)*		HMDB0005779		-2.2369	2.1699		-1.8792	-1.796	0.2902	-0.6683	-0.9749	-0.1629		Lipid	Plasmalogen	100008999
	2819	Lipid	Plasmalogen	1-(1-enyl-stearoyl)-2-docosahexaenoyl-GPC (P-18:0/22:6)*		HMDB0011262		-2.0788	1.6965		-0.5323	-0.2184	-0.8787	-1.1515	0.4861	0.4178		Lipid	Plasmalogen	100009015
	2821	Lipid	Plasmalogen	1-(1-enyl-stearoyl)-2-docosahexaenoyl-GPE (P-18:0/22:6)*		HMDB0011394		-2.0657	1.7711		-1.1236	-0.9408	-1.3519	-1.3315	-0.2092	0.4184		Lipid	Plasmalogen	100009004
	2822	Lipid	Plasmalogen	1-(1-enyl-stearoyl)-2-docosapentaenoyl-GPE (P-18:0/22:5n3)*		HMDB0011393		-2.1327	1.7933		-0.892	-0.5144	1.0794	0.1828	-0.9593	0.673		Lipid	Plasmalogen	100015596
	2823	Lipid	Plasmalogen	1-(1-enyl-stearoyl)-2-dihomo-linolenoyl-GPE (P-18:0/20:3)*		HMDB0011384		-2.1375	1.784		-0.4311	-0.4179	0.8564	0.3257	0.8197	0.9934		Lipid	Plasmalogen	100009378
	2824	Lipid	Plasmalogen	1-(1-enyl-stearoyl)-2-linoleoyl-GPC (P-18:0/18:2)*		HMDB0011244		-1.9866	2.0438		-0.4371	0.2061	0.835	0.6325	-0.7103	0.0832		Lipid	Plasmalogen	100009135
	2825	Lipid	Plasmalogen	1-(1-enyl-stearoyl)-2-oleoyl-GPC (P-18:0/18:1)		HMDB0011243		-1.9664	2.0863		-0.7514	-0.1463	-0.0903	-0.0036	0.0604	-0.3999		Lipid	Plasmalogen	100008917
	2827	Lipid	Plasmalogen	1-stearyl-2-linoleoyl-GPC (O-18:0/18:2)*		HMDB13418		-2.3425	2.0953		-2.5393	-1.8581	0.1514	-0.3333	-0.6719	-1.519		Lipid	Plasmalogen	100015590
	2828	Lipid	Plasmalogen	phosphatidylcholine (O-18:1/20:4, O-16:0/22:5n3)*				-2.174	1.862		-1.2244	-1.4787	-0.628	-1.2467	-2.1533	-1.8428		Lipid	Plasmalogen	100016007
	2829	Lipid	Lysoplasmalogen	1-palmityl-GPE (O-16:0)*					1.9724			-0.5101	-0.0583	-0.4699		-1.2817		Lipid	Lysoplasmalogen	100010962
	2830	Lipid	Lysoplasmalogen	1-palmityl-GPC (O-16:0)				-2.0566	2.4875		-2.8126	-2.2747	-0.8347	-1.5786	-1.8526	-1.9167		Lipid	Lysoplasmalogen	100000611
	2831	Lipid	Lysoplasmalogen	1-stearyl-GPC (O-18:0)*	C04317	HMDB0011149		-2.4263	2.4865		-2.8981	-2.2325	-0.6117	-1.5334	-1.8069	-1.7135		Lipid	Lysoplasmalogen	100009147
	2833	Lipid	Lysoplasmalogen	1-(1-enyl-palmitoyl)-GPC (P-16:0)*		HMDB0010407		-2.0405	2.4933		-3.1471	-2.4497	-1.1861	-1.9463	-2.0326	-1.9268		Lipid	Lysoplasmalogen	100002875
	2834	Lipid	Lysoplasmalogen	1-(1-enyl-palmitoyl)-GPE (P-16:0)*		HMDB0011152		-1.7269	2.2493		-1.6836	-1.5203	-0.4824	-1.3041	-1.7099	-1.3066		Lipid	Lysoplasmalogen	100003000
	2835	Lipid	Lysoplasmalogen	1-(1-enyl-oleoyl)-GPC (P-18:1)*		HMDB0010408			2.2621		-0.6229	-0.4537	0.1782	-0.3929	-1.0266	-0.8869		Lipid	Lysoplasmalogen	100002876
	2836	Lipid	Lysoplasmalogen	1-(1-enyl-oleoyl)-GPE (P-18:1)*					1.8539		-0.3295	-0.1336	0.0868	-0.9678	-1.0404	-0.6464		Lipid	Lysoplasmalogen	100005372
	2837	Lipid	Lysoplasmalogen	1-(1-enyl-stearoyl)-GPC (P-18:0)*		HMDB0013122			2.1792		-1.859	-1.0034	-0.5731	-0.8453	-0.8003	-0.8434		Lipid	Lysoplasmalogen	100002877
	2838	Lipid	Lysoplasmalogen	1-(1-enyl-stearoyl)-GPE (P-18:0)*				-1.7597	2.2596		-2.1835	-1.7398	-0.5669	-1.4204	-1.7453	-1.2783		Lipid	Lysoplasmalogen	100003001
	2841	Lipid	Glycerolipid Metabolism	glycerol	C00116	HMDB0000131		-2.3013	1.7435		1.3323	2.3276	-0.2296	0.7467	-0.4053	0.2447		Lipid	Glycerolipid Metabolism	1254
	2842	Lipid	Glycerolipid Metabolism	glycerol 3-phosphate	C0093	HMDB0000126			1.7469		-0.2083	-0.3984		0.8622	1.2082	0.8199		Lipid	Glycerolipid Metabolism	100000258
	2847	Lipid	Glycerolipid Metabolism	glycerophosphoglycerol	C03274	HMDB0240316			1.7925									Lipid	Glycerolipid Metabolism	100001619
	2848	Lipid	Monoacylglycerol	1-myristoylglycerol (14:0)	C01885	HMDB0011561			2.0754		0.9413	0.8457	0.9756	0.7444	0.3692	0.567		Lipid	Monoacylglycerol	100001618
	2851	Lipid	Monoacylglycerol	1-palmitoylglycerol (16:0)		HMDB0011564			2.156		2.456	3.4071	1.5173	2.7083	2.4172	0.5196		Lipid	Monoacylglycerol	100000827
	2855	Lipid	Monoacylglycerol	1-oleoylglycerol (18:1)		HMDB0011567		-1.9481	1.9907		0.0185	0.5149	0.1626	0.0212	-0.3411	-0.9124		Lipid	Monoacylglycerol	100000924
	2856	Lipid	Monoacylglycerol	1-linoleoylglycerol (18:2)		HMDB0011568		-1.8507	2.2898		-0.0256	0.6655	0.4945	0.0622	-0.3563	-1.216		Lipid	Monoacylglycerol	100001040
	2857	Lipid	Monoacylglycerol	1-linolenoylglycerol (18:3)		HMDB0011569			1.7138									Lipid	Monoacylglycerol	100001435
	2861	Lipid	Monoacylglycerol	1-dihomo-linolenylglycerol (20:3)					1.8497									Lipid	Monoacylglycerol	100006121
	2862	Lipid	Monoacylglycerol	1-arachidonylglycerol (20:4)	C13857	HMDB11578			1.7347									Lipid	Monoacylglycerol	100001433
	2871	Lipid	Monoacylglycerol	2-oleoylglycerol (18:1)		HMDB0011537			1.6794									Lipid	Monoacylglycerol	100000943
	2872	Lipid	Monoacylglycerol	2-linoleoylglycerol (18:2)		HMDB0011538			1.8393									Lipid	Monoacylglycerol	100000987
	2889	Lipid	Diacylglycerol	diacylglycerol (16:1/18:2 [2], 16:0/18:3 [1])*					1.6513		0.0845	0.3637	0.0865	-0.2292	-0.13	-0.3026		Lipid	Diacylglycerol	100010940
	2905	Lipid	Diacylglycerol	palmitoyl-oleoyl-glycerol (16:0/18:1) [2]*	C13861	HMDB0007102												Lipid	Diacylglycerol	100010917
	2906	Lipid	Diacylglycerol	palmitoyl-linoleoyl-glycerol (16:0/18:2) [1]*		HMDB0007103			1.6836		-1.0561	0.0076	-0.6809	-0.528	-1.4042	-0.9852		Lipid	Diacylglycerol	100009052
	2907	Lipid	Diacylglycerol	palmitoyl-linoleoyl-glycerol (16:0/18:2) [2]*		HMDB0007103		-2.5269	2.0167		-1.0331	-0.3547	-0.6572	-1.2023	-1.7181	-1.5101		Lipid	Diacylglycerol	100009055
	2911	Lipid	Diacylglycerol	palmitoleoyl-linoleoyl-glycerol (16:1/18:2) [1]*		HMDB0007132												Lipid	Diacylglycerol	100010930
	2914	Lipid	Diacylglycerol	palmitoyl-arachidonoyl-glycerol (16:0/20:4) [2]*		HMDB0007112												Lipid	Diacylglycerol	100010925
	2924	Lipid	Diacylglycerol	oleoyl-oleoyl-glycerol (18:1/18:1) [2]*		HMDB0007218			1.7122		0.3535	0.6055	-0.1436	-0.2255	-0.1846	-0.3689		Lipid	Diacylglycerol	100010919
	2926	Lipid	Diacylglycerol	oleoyl-linoleoyl-glycerol (18:1/18:2) [1]		HMDB0007219		-2.1536	1.8977		0.6313	1.6056	0.0344	0.3982	-0.4023	-0.127		Lipid	Diacylglycerol	100002989
	2927	Lipid	Diacylglycerol	oleoyl-linoleoyl-glycerol (18:1/18:2) [2]		HMDB0007219		-2.2562	1.8654		0.7052	1.3249	0.2427	0.0336	-0.3775	-0.4314		Lipid	Diacylglycerol	100002990
	2931	Lipid	Diacylglycerol	linoleoyl-linoleoyl-glycerol (18:2/18:2) [1]*		HMDB0007248		-3.0815	1.7646		0.7772	1.4438	-0.0751	0.48	-0.2676	0.1259		Lipid	Diacylglycerol	100010941
	2934	Lipid	Diacylglycerol	linoleoyl-linolenoyl-glycerol (18:2/18:3) [2]*		HMDB0007250			1.6967		0.8513	1.2959	0.3711	0.6684	0.5342	0.6645		Lipid	Diacylglycerol	100010927
	2937	Lipid	Diacylglycerol	stearoyl-arachidonoyl-glycerol (18:0/20:4) [1]*	C00165	HMDB0007170												Lipid	Diacylglycerol	100010949
	2940	Lipid	Diacylglycerol	oleoyl-arachidonoyl-glycerol (18:1/20:4) [2]*		HMDB0007228			1.945		0.1191	-0.0788	0.3688	-1.4386	0.2294	-0.9682		Lipid	Diacylglycerol	100010937
	2941	Lipid	Diacylglycerol	linoleoyl-arachidonoyl-glycerol (18:2/20:4) [1]*		HMDB0007257			1.563		0.5093	0.7237	0.2084	0.2539	0.1818	0.0768		Lipid	Diacylglycerol	100010922
	2942	Lipid	Diacylglycerol	linoleoyl-arachidonoyl-glycerol (18:2/20:4) [2]*		HMDB0007257			1.5944		0.2756	-0.4138	0.1705	-1.2792	0.1362	-1.1988		Lipid	Diacylglycerol	100010923
	3000	Lipid	Sphingolipid Synthesis	sphinganine	C00836	HMDB0000269		-1.7493	1.7892		-0.849	-0.4414	-0.8533	-0.9321	-1.1519	-1.114		Lipid	Sphingolipid Synthesis	313
	3001	Lipid	Sphingolipid Synthesis	sphinganine-1-phosphate		HMDB0001383		-2.0631	2.0958									Lipid	Sphingolipid Synthesis	100001876
	3009	Lipid	Dihydroceramides	N-palmitoyl-sphinganine (d18:0/16:0)		HMDB11760		-2.554	1.9875		-0.8272	-0.0343	-0.5025	-0.4295	-0.3037	-0.5689		Lipid	Dihydroceramides	100009028
	3012	Lipid	Dihydroceramides	N-stearoyl-sphinganine (d18:0/18:0)*					1.8333		-1.5344	-0.5314	-0.6459	-1.226	-0.8241	0.2354		Lipid	Dihydroceramides	922
	3021	Lipid	Ceramides	N-palmitoyl-sphingosine (d18:1/16:0)		HMDB0004949		-2.5247	2.1524		-0.6388	-0.0452	-0.353	-0.5122	-0.5984	-0.1566		Lipid	Ceramides	1518
	3025	Lipid	Ceramides	N-stearoyl-sphingosine (d18:1/18:0)*		HMDB0004950		-2.3145	2.0179		-1.3326	-0.959	-1.0496	-1.1424	-1.4504	-0.7237		Lipid	Ceramides	1547
	3047	Lipid	Ceramides	ceramide (d18:1/14:0, d16:1/16:0)*					1.6809		-0.7139	0.4475	-0.5967	0.4133	-0.3329	0.3395		Lipid	Ceramides	100015735
	3051	Lipid	Ceramides	ceramide (d16:1/24:1, d18:1/22:1)*					1.6039		0.2631	0.3268	0.6454	0.1945	0.2697	0.5752		Lipid	Ceramides	100015727
	3052	Lipid	Ceramides	ceramide (d18:2/24:1, d18:1/24:2)*				-1.8155	2.1841		-0.1082	0.1161	-0.1746	-0.6503	-0.5389	-0.1428		Lipid	Ceramides	100015744
	3057	Lipid	Hexosylceramides (HCER)	glycosyl-N-palmitoyl-sphingosine (d18:1/16:0)				-2.287	2.0434		-0.763	-0.7985	-0.8533	-0.9749	-0.9911	-0.9159		Lipid	Hexosylceramides (HCER)	100009272
	3058	Lipid	Hexosylceramides (HCER)	glycosyl-N-stearoyl-sphingosine (d18:1/18:0)				-2.09	1.808		-1.6563	-0.9001	0.1519	-0.48	0.0275	-0.5138		Lipid	Hexosylceramides (HCER)	100001882
	3068	Lipid	Hexosylceramides (HCER)	glycosyl-N-behenoyl-sphingadienine (d18:2/22:0)*														Lipid	Hexosylceramides (HCER)	100015625
	3078	Lipid	Hexosylceramides (HCER)	glycosyl ceramide (d18:1/20:0, d16:1/22:0)*				-2.3368	1.6795		-0.7303	-0.336	0.5396	0.3095	0.4916	0.1197		Lipid	Hexosylceramides (HCER)	100015882
	3082	Lipid	Hexosylceramides (HCER)	glycosyl ceramide (d18:2/24:1, d18:1/24:2)*				-2.1344	1.9191		-0.9763	0.0075	-0.6473	-0.2039	-0.6366	-0.0598		Lipid	Hexosylceramides (HCER)	100015745
	3087	Lipid	Lactosylceramides (LCER)	lactosyl-N-palmitoyl-sphingosine (d18:1/16:0)				-1.8314	1.9995		-0.3487	0.1003	-1.1747	-0.937	-0.9432	-0.6851		Lipid	Lactosylceramides (LCER)	100009030
	3091	Lipid	Lactosylceramides (LCER)	lactosyl-N-nervonoyl-sphingosine (d18:1/24:1)*				-2.1154	1.9794		-0.0023	0.3583	0.5372	-0.2105	0.1695	0.4337		Lipid	Lactosylceramides (LCER)	100015620
	3098	Lipid	Dihydrosphingomyelins	myristoyl dihydrosphingomyelin (d18:0/14:0)*		HMDB0012085		-2.3784	1.5551		-0.2776	-0.2879	1.0256	0.8751	1.8	1.8636		Lipid	Dihydrosphingomyelins	100009038
	3099	Lipid	Dihydrosphingomyelins	palmitoyl dihydrosphingomyelin (d18:0/16:0)*		HMDB0010168		-2.2713	1.9477		-1.0723	-1.0319	-0.004	-0.7385	0.6428	0.6042		Lipid	Dihydrosphingomyelins	100008954
	3100	Lipid	Dihydrosphingomyelins	behenoyl dihydrosphingomyelin (d18:0/22:0)*		HMDB0012091		-2.1057	2.035		-1.2984	-1.4719	-0.3789	-0.6604	0.0116	0.5041		Lipid	Dihydrosphingomyelins	100009026
	3101	Lipid	Dihydrosphingomyelins	sphingomyelin (d18:0/18:0, d19:0/17:0)*		HMDB0012087		-1.9443	1.9674		-1.7583	-1.6888	-0.8975	-0.9879	-0.14	0.1315		Lipid	Dihydrosphingomyelins	100009027
	3102	Lipid	Dihydrosphingomyelins	sphingomyelin (d18:0/20:0, d16:0/22:0)*				-2.1434	1.765		-1.4701	-1.4004	-0.412	-0.6925	0.1714	0.5925		Lipid	Dihydrosphingomyelins	100015786
	3103	Lipid	Sphingomyelins	palmitoyl sphingomyelin (d18:1/16:0)		HMDB0010169		-2.2254	2.0251		-1.2436	-0.2738	-0.3319	-0.2906	-0.4083	-0.249		Lipid	Sphingomyelins	100002107
	3105	Lipid	Sphingomyelins	stearoyl sphingomyelin (d18:1/18:0)	C00550	HMDB0001348		-2.0433	1.987		-2.1748	-1.8684	-1.925	-1.7503	-1.6898	-1.4926		Lipid	Sphingomyelins	1538
	3106	Lipid	Sphingomyelins	behenoyl sphingomyelin (d18:1/22:0)*		HMDB0012103		-2.3329	1.7551		-0.7507	-0.5424	-0.0325	-0.151	-0.0923	0.1148		Lipid	Sphingomyelins	100006294
	3107	Lipid	Sphingomyelins	tricosanoyl sphingomyelin (d18:1/23:0)*		HMDB0012105		-2.1432	2.0537		-0.2588	-0.1013	0.2614	0.2485	0.4286	0.4566		Lipid	Sphingomyelins	100008955
	3108	Lipid	Sphingomyelins	lignoceroyl sphingomyelin (d18:1/24:0)				-2.2083	2.0775		-0.2711	-0.0013	0.3492	0.2181	0.7004	0.9929		Lipid	Sphingomyelins	100006298
	3109	Lipid	Sphingomyelins	sphingomyelin (d18:2/18:1)*		HMDB0001348		-1.8616	1.9744		-0.0359	0.3422	-0.2308	-0.0502	-0.2672	-0.6434		Lipid	Sphingomyelins	100015788
	3110	Lipid	Sphingomyelins	sphingomyelin (d18:2/23:1)*				-2.1391	1.7838		0.6266	0.7123	0.8004	0.6709	0.8957	0.5103		Lipid	Sphingomyelins	100015791
	3111	Lipid	Sphingomyelins	sphingomyelin (d18:2/24:2)*				-1.8656	1.9737		-0.1892	0.0108	-0.2342	-0.0866	0.6446	0.2641		Lipid	Sphingomyelins	100015789
	3113	Lipid	Sphingomyelins	sphingomyelin (d18:1/14:0, d16:1/16:0)*		HMDB0012097		-2.654	1.5439		0.1325	0.5257	1.0799	1.0883	1.1345	0.9855		Lipid	Sphingomyelins	100004328
	3114	Lipid	Sphingomyelins	sphingomyelin (d18:2/14:0, d18:1/14:1)*				-2.2078	1.9505		0.6899	0.8712	1.6759	1.5641	1.9392	1.7866		Lipid	Sphingomyelins	100005985
	3115	Lipid	Sphingomyelins	sphingomyelin (d17:1/16:0, d18:1/15:0, d16:1/17:0)*				-2.3264	1.7284		0.6336	0.8317	1.6784	1.4878	1.4273	1.1314		Lipid	Sphingomyelins	100006314
	3116	Lipid	Sphingomyelins	sphingomyelin (d17:2/16:0, d18:2/15:0)*					1.8006		0.3883	0.5704	0.6705	0.9555	0.8845	0.5648		Lipid	Sphingomyelins	100015793
	3117	Lipid	Sphingomyelins	sphingomyelin (d18:2/16:0, d18:1/16:1)*				-2.2409	1.9359		-0.2624	0.6634	0.3072	0.4725	0.4366	0.0621		Lipid	Sphingomyelins	100004329
	3118	Lipid	Sphingomyelins	sphingomyelin (d18:1/17:0, d17:1/18:0, d19:1/16:0)				-2.2146	1.7419		-0.5332	-0.0556	0.0861	0.0048	0.0608	-0.2467		Lipid	Sphingomyelins	100008920
	3119	Lipid	Sphingomyelins	sphingomyelin (d18:1/18:1, d18:2/18:0)		HMDB0012101		-1.9721	1.8719		-1.4586	-0.794	-1.3456	-1.1018	-1.7078	-1.5377		Lipid	Sphingomyelins	100002106
	3120	Lipid	Sphingomyelins	sphingomyelin (d18:1/19:0, d19:1/18:0)*				-2.1408	1.7727		-0.3294	-0.1744	0.1287	-0.0205	-0.1072	-0.1617		Lipid	Sphingomyelins	100015787
	3121	Lipid	Sphingomyelins	sphingomyelin (d18:1/20:0, d16:1/22:0)*		HMDB0012102		-2.2066	1.9329		0.1488	-0.3225	0.6547	-0.3183	0.6021	-0.1518		Lipid	Sphingomyelins	100006290
	3122	Lipid	Sphingomyelins	sphingomyelin (d18:1/20:1, d18:2/20:0)*				-2.098	1.954		-1.1806	-1.1319	-2.1189	-1.8528	-1.6913	-1.7395		Lipid	Sphingomyelins	100006292
	3123	Lipid	Sphingomyelins	sphingomyelin (d18:1/20:2, d18:2/20:1, d16:1/22:2)*				-2.2482	1.9158		1.1164	1.4355	1.1261	1.1033	1.1163	1.1838		Lipid	Sphingomyelins	100006293
	3124	Lipid	Sphingomyelins	sphingomyelin (d18:1/21:0, d17:1/22:0, d16:1/23:0)*				-2.269	1.7751		0.1203	0.0825	0.9493	0.1827	0.8315	0.2872		Lipid	Sphingomyelins	100009025
	3125	Lipid	Sphingomyelins	sphingomyelin (d18:2/21:0, d16:2/23:0)*				-2.121	1.9196		0.0044	0.0857	0.2397	0.1477	0.0406	-0.2718		Lipid	Sphingomyelins	100015790
	3126	Lipid	Sphingomyelins	sphingomyelin (d18:1/22:1, d18:2/22:0, d16:1/24:1)*		HMDB0012104		-2.6309	1.7541		-2.2763	-2.8076	-2.3323	-3.4313	-2.609	-3.882		Lipid	Sphingomyelins	100006295
	3127	Lipid	Sphingomyelins	sphingomyelin (d18:1/22:2, d18:2/22:1, d16:1/24:2)*				-2.2393	1.9072		0.0948	0.1121	0.0233	0.325	0.7413	0.5708		Lipid	Sphingomyelins	100006296
	3128	Lipid	Sphingomyelins	sphingomyelin (d18:2/23:0, d18:1/23:1, d17:1/24:1)*				-2.2687	1.9246		0.7045	0.5855	1.159	0.3283	0.9402	0.1429		Lipid	Sphingomyelins	100008956
	3129	Lipid	Sphingomyelins	sphingomyelin (d18:1/24:1, d18:2/24:0)*		HMDB0012107		-2.5272	1.9197		0.7704	0.9311	0.8146	0.4877	0.9834	0.8865		Lipid	Sphingomyelins	100005986
	3130	Lipid	Sphingomyelins	sphingomyelin (d18:2/24:1, d18:1/24:2)*				-2.2185	1.8764		1.0208	1.008	0.7568	0.332	0.9889	0.761		Lipid	Sphingomyelins	100008957
	3131	Lipid	Sphingomyelins	sphingomyelin (d18:1/25:0, d19:0/24:1, d20:1/23:0, d19:1/24:0)*				-2.5665	1.4966		-0.8049	-0.6183	-0.5213	-0.0694	-0.576	-0.3463		Lipid	Sphingomyelins	100015792
	3159	Lipid	Sphingosines	sphingosine	C00319	HMDB0000252		-1.8814	1.7215		-1.0019	-0.8771	-0.9929	-1.8851	-1.6773	-1.2208		Lipid	Sphingosines	297
	3161	Lipid	Sphingosines	sphingosine 1-phosphate	C06124	HMDB0000277		-2.274	2.0038		-3.0205	-1.5732	-0.0642	-3.2398	-3.0944	0.6732		Lipid	Sphingosines	100000626
	3167	Lipid	Sphingosines	hexadecasphingosine (d16:1)*					2.1424									Lipid	Sphingosines	100015723
	3175	Lipid	Mevalonate Metabolism	3-hydroxy-3-methylglutarate	C03761	HMDB0000355		-2.2406	1.9941		-0.9108	0.0979	-0.0235	-0.644	-0.4622	-0.5579		Lipid	Mevalonate Metabolism	112
	3192	Lipid	Sterol	cholesterol	C00187	HMDB0000067		-2.2582	2.0122		0.282	0.7573	0.3625	0.2447	0.87	1.3696		Lipid	Sterol	266
	3195	Lipid	Sterol	7-dehydrocholesterol	C01164	HMDB0000032												Lipid	Sterol	264
	3206	Lipid	Sterol	7-alpha-hydroxy-3-oxo-4-cholestenoate (7-Hoca)	C17337	HMDB0012458		-2.0887	2.0308		1.2596	0.2012	-0.128	-0.3779	-0.6908	-0.8585		Lipid	Sterol	100001609
	3209	Lipid	Sterol	3beta-hydroxy-5-cholestenoate	C17333			-1.9787	2.113		-1.0416	-0.7021	-0.4467	-0.7472	-1.1185	-2.064		Lipid	Sterol	100006370
	3219	Lipid	Sterol	4-cholesten-3-one	C00599	HMDB0000921			1.6592		0.3867	0.8872	0.1679	0.4415	0.0998	0.0422		Lipid	Sterol	100002227
	3221	Lipid	Sterol	beta-sitosterol	C01753	HMDB0000852			1.6017									Lipid	Sterol	100001033
	3224	Lipid	Sterol	campesterol	C01789	HMDB0002869			1.557									Lipid	Sterol	100001269
	3241	Lipid	Sterol	7-hydroxycholesterol (alpha or beta)	C15610	HMDB0006119												Lipid	Sterol	100005999
	3243	Lipid	Pregnenolone Steroids	pregnenolone sulfate	C18044	HMDB0000774		-2.2568	1.827		-1.1309	-1.1391	-1.7356	-1.4936	-2.1908	-1.6135		Lipid	Pregnenolone Steroids	100002129
	3247	Lipid	Pregnenolone Steroids	17alpha-hydroxypregnenolone 3-sulfate		HMDB00416			1.7255									Lipid	Pregnenolone Steroids	100002128
	3248	Lipid	Pregnenolone Steroids	17alpha-hydroxypregnanolone glucuronide					1.7274							1.1276		Lipid	Pregnenolone Steroids	100005418
	3250	Lipid	Pregnenolone Steroids	21-hydroxypregnenolone monosulfate (1)					1.7295									Lipid	Pregnenolone Steroids	100002003
	3253	Lipid	Pregnenolone Steroids	21-hydroxypregnenolone disulfate				-2.2631	1.7541		-0.2486	0.0018	-0.5888	-0.2946	-0.2661	-0.334		Lipid	Pregnenolone Steroids	100001999
	3259	Lipid	Pregnenolone Steroids	pregnenediol sulfate (C21H34O5S)*	C18044	HMDB0000774		-1.9914	2.208		-0.9146	-0.7553	-1.1239	-1.0517	-1.2003	-1.317		Lipid	Pregnenolone Steroids	100002067
	3260	Lipid	Pregnenolone Steroids	pregnenediol disulfate (C21H34O8S2)*				-2.1729	1.6482		-0.2508	0.2406	-0.7348	-0.3373	-0.5134	-0.5137		Lipid	Pregnenolone Steroids	100001993
	3270	Lipid	Progestin Steroids	5alpha-pregnan-3beta-ol,20-one sulfate														Lipid	Progestin Steroids	100002035
	3271	Lipid	Progestin Steroids	5alpha-pregnan-3beta,20beta-diol monosulfate (1)		HMDB0240580			2.1805									Lipid	Progestin Steroids	100002009
	3274	Lipid	Progestin Steroids	5alpha-pregnan-3beta,20alpha-diol monosulfate (2)					2.0068									Lipid	Progestin Steroids	100002014
	3280	Lipid	Progestin Steroids	5alpha-pregnan-3beta,20alpha-diol disulfate		HMDB0094650		-1.8048	2.1431		-0.7615	-0.1784	-1.5787	-0.4579	-0.2059	-0.2448		Lipid	Progestin Steroids	100001988
	3281	Lipid	Progestin Steroids	5alpha-pregnan-diol disulfate		HMDB0240582 HMDB0240581			1.8634									Lipid	Progestin Steroids	100002015
	3283	Lipid	Progestin Steroids	pregnanediol-3-glucuronide		HMDB0010318			1.8715									Lipid	Progestin Steroids	100003470
	3288	Lipid	Progestin Steroids	pregnanolone/allopregnanolone sulfate	C05480	HMDB0240591 HMDB0062782			1.8769									Lipid	Progestin Steroids	100006173
	3305	Lipid	Corticosteroids	cortisol	C00735	HMDB0000063		-2.2104	1.9081		0.746	-2.3645	-3.738	-1.8652	-2.2169	-1.079		Lipid	Corticosteroids	356
	3315	Lipid	Corticosteroids	cortisone	C00762	HMDB0002802		-2.3729	1.6618		0.0114			-1.4148	-2.9584	-0.8733		Lipid	Corticosteroids	273
	3337	Lipid	Androgenic Steroids	dehydroepiandrosterone sulfate (DHEA-S)	C04555	HMDB0001032		-1.6636	2.0003		0.0797	0.1843	0.0457	0.1441	0.1362	0.1474		Lipid	Androgenic Steroids	100000792
	3339	Lipid	Androgenic Steroids	16a-hydroxy DHEA 3-sulfate		HMDB0062544		-2.1495	1.5436		-0.8025	-0.5088	-0.7999	-0.6152	-0.7912	-0.7407		Lipid	Androgenic Steroids	100002126
	3342	Lipid	Androgenic Steroids	epiandrosterone sulfate	C04555	HMDB0062657			1.7826		0.6567	0.6828	0.54	0.6665	0.8037	0.8183		Lipid	Androgenic Steroids	100001287
	3350	Lipid	Androgenic Steroids	androsterone sulfate		HMDB0002759			2.1241		0.8425	0.7847	0.6195	0.7662	0.9557	0.9881		Lipid	Androgenic Steroids	100001073
	3353	Lipid	Androgenic Steroids	etiocholanolone glucuronide		HMDB0004484			1.5962									Lipid	Androgenic Steroids	100005403
	3360	Lipid	Androgenic Steroids	androstenediol (3beta,17beta) monosulfate (1)		HMDB0240429			1.8866		0.3495	0.1909	0.3077	0.3747	0.3999	0.3911		Lipid	Androgenic Steroids	100002028
	3361	Lipid	Androgenic Steroids	androstenediol (3beta,17beta) monosulfate (2)		HMDB0186954 HMDB0240429			1.6516									Lipid	Androgenic Steroids	100002029
	3363	Lipid	Androgenic Steroids	androstenediol (3beta,17beta) disulfate (1)	C04295	HMDB0240313		-1.773	2.0644		0.4286	0.5327	0.3293	0.2778	0.34	0.325		Lipid	Androgenic Steroids	100001992
	3364	Lipid	Androgenic Steroids	androstenediol (3beta,17beta) disulfate (2)		HMDB0240313		-1.8912	2.1494		-0.0636	0.2116	-0.532	-0.04	0.049	0.0434		Lipid	Androgenic Steroids	100001994
	3367	Lipid	Androgenic Steroids	androstenediol (3alpha, 17alpha) monosulfate (2)					1.6588							0.6159		Lipid	Androgenic Steroids	100002026
	3368	Lipid	Androgenic Steroids	androstenediol (3alpha, 17alpha) monosulfate (3)					2.3036									Lipid	Androgenic Steroids	100002027
	3378	Lipid	Androgenic Steroids	5alpha-androstan-3alpha,17beta-diol monosulfate (1)					1.6488									Lipid	Androgenic Steroids	100002018
	3379	Lipid	Androgenic Steroids	5alpha-androstan-3alpha,17beta-diol monosulfate (2)					1.7644									Lipid	Androgenic Steroids	100006005
	3380	Lipid	Androgenic Steroids	5alpha-androstan-3alpha,17beta-diol disulfate		HMDB0094682			1.6961									Lipid	Androgenic Steroids	100002017
	3385	Lipid	Androgenic Steroids	5alpha-androstan-3beta,17beta-diol monosulfate (2)					1.6553									Lipid	Androgenic Steroids	100002024
	3386	Lipid	Androgenic Steroids	5alpha-androstan-3beta,17beta-diol disulfate	C12525	HMDB00493			1.6876		0.8638	0.9321	0.6423	0.7152	0.9215	0.9271		Lipid	Androgenic Steroids	100001987
	3389	Lipid	Androgenic Steroids	5alpha-androstan-3beta,17alpha-diol disulfate		HMDB0094682			1.6974									Lipid	Androgenic Steroids	100002021
	3393	Lipid	Androgenic Steroids	andro steroid monosulfate C19H28O6S (1)*		HMDB0002759			1.6873									Lipid	Androgenic Steroids	100002152
	3453	Lipid	Primary Bile Acid Metabolism	cholate	C00695	HMDB0000619			2.7413		-0.6118	-1.0324	0.1445	-0.1091	-1.6106	-0.4661		Lipid	Primary Bile Acid Metabolism	136
	3454	Lipid	Primary Bile Acid Metabolism	glycocholate	C01921	HMDB0000138		-2.2908	1.7967		-0.7497	-0.7522	-1.3942	-1.2358	-1.8492	0.0874		Lipid	Primary Bile Acid Metabolism	342
	3455	Lipid	Primary Bile Acid Metabolism	taurocholate	C05122	HMDB0000036		-2.2156	1.6308									Lipid	Primary Bile Acid Metabolism	1648
	3456	Lipid	Primary Bile Acid Metabolism	chenodeoxycholate	C02528	HMDB0000518			2.0245		-1.3584	-2.0558	-0.8557	-0.7878	-1.9459	-1.7705		Lipid	Primary Bile Acid Metabolism	1123
	3461	Lipid	Primary Bile Acid Metabolism	glycochenodeoxycholate	C05466	HMDB0000637		-2.5932	1.6755		-1.6868	-1.2541	-1.1566	-0.9978	-2.2391	-0.372		Lipid	Primary Bile Acid Metabolism	1628
	3462	Lipid	Primary Bile Acid Metabolism	taurochenodeoxycholate	C05465	HMDB0000951		-2.1538	1.5661		-1.4993	-1.0114	-0.9035	-0.5253	-0.9326	-0.3777		Lipid	Primary Bile Acid Metabolism	1629
	3466	Lipid	Primary Bile Acid Metabolism	tauro-beta-muricholate		HMDB0000932			1.6836		0.4859	0.8853	0.7572	1.0479	1.0411	1.1422		Lipid	Primary Bile Acid Metabolism	100001250
	3472	Lipid	Primary Bile Acid Metabolism	glycochenodeoxycholate glucuronide (1)		HMDB0002579			1.7364		0.8664	0.8781	0.5215	1.1217	0.8703	1.1037		Lipid	Primary Bile Acid Metabolism	100009264
	3474	Lipid	Primary Bile Acid Metabolism	glycochenodeoxycholate 3-sulfate		HMDB0002409 HMDB0002497 HMDB0002496		-2.3508	1.8642		-0.6969	-0.4185	-0.7575	-0.7063	-0.1661	-0.8546		Lipid	Primary Bile Acid Metabolism	100006641
	3478	Lipid	Secondary Bile Acid Metabolism	deoxycholate	C04483	HMDB0000626			1.7013		1.4857	1.2224	1.3935	1.5244	0.8688	1.4777		Lipid	Secondary Bile Acid Metabolism	302
	3486	Lipid	Secondary Bile Acid Metabolism	glycodeoxycholate	C05464	HMDB00631			1.6059									Lipid	Secondary Bile Acid Metabolism	100000436
	3488	Lipid	Secondary Bile Acid Metabolism	taurodeoxycholate	C05463	HMDB0000896			1.612		1.3165	1.422	1.4162	1.4809	1.4655	1.7073		Lipid	Secondary Bile Acid Metabolism	1668
	3498	Lipid	Secondary Bile Acid Metabolism	glycolithocholate	C15557	HMDB00698			1.9192			0.8317		0.5437		1.6582		Lipid	Secondary Bile Acid Metabolism	100001064
	3499	Lipid	Secondary Bile Acid Metabolism	glycolithocholate sulfate*	C11301	HMDB0002639		-1.6363	1.6114		0.9647	1.2643	-0.0976	1.0067	1.0636	1.5441		Lipid	Secondary Bile Acid Metabolism	100001657
	3501	Lipid	Secondary Bile Acid Metabolism	taurolithocholate 3-sulfate	C03642	HMDB0002580			1.5775		0.76	1.6502	0.1575	1.1843	1.6112	1.4835		Lipid	Secondary Bile Acid Metabolism	100001658
	3503	Lipid	Secondary Bile Acid Metabolism	ursodeoxycholate	C07880	HMDB0000946			1.6551		0.9922	0.1129	1.5075	1.219	0.3077	0.2232		Lipid	Secondary Bile Acid Metabolism	1135
	3508	Lipid	Secondary Bile Acid Metabolism	isoursodeoxycholate	C17662	HMDB0000686		-2.5172	1.6201		1.5303	-0.2191	1.5016	1.3939	0.4384	0.2853		Lipid	Secondary Bile Acid Metabolism	100002488
	3513	Lipid	Secondary Bile Acid Metabolism	glycoursodeoxycholate		HMDB0000708		-2.3311	1.6477		0.8085	0.4936	0.4209	1.3129	-0.5385	0.7868		Lipid	Secondary Bile Acid Metabolism	100002911
	3517	Lipid	Secondary Bile Acid Metabolism	tauroursodeoxycholate		HMDB0000874			1.6559									Lipid	Secondary Bile Acid Metabolism	100002912
	3524	Lipid	Secondary Bile Acid Metabolism	hyocholate	C17649	HMDB0000760		-2.178	2.3035		-1.091		1.8246	0.7089	-0.8544	-1.2767		Lipid	Secondary Bile Acid Metabolism	100001279
	3525	Lipid	Secondary Bile Acid Metabolism	glycohyocholate		HMDB0000138		-2.1859	1.8244		-1.0573	-0.9462	-0.0032	0.2429	-1.0572	-0.5529		Lipid	Secondary Bile Acid Metabolism	100004083
	3534	Lipid	Secondary Bile Acid Metabolism	glycocholenate sulfate*				-2.1647	2.0407		-1.4475	-1.2232	-2.5296	-1.261	-0.7611	-0.9021		Lipid	Secondary Bile Acid Metabolism	100001989
	3535	Lipid	Secondary Bile Acid Metabolism	taurocholenate sulfate*				-2.0276	1.8712		-1.3869	0.0956	-1.0537	-0.5657	0.3722	-0.7659		Lipid	Secondary Bile Acid Metabolism	100001990
	3538	Lipid	Secondary Bile Acid Metabolism	3b-hydroxy-5-cholenoic acid		HMDB0000308			1.8003									Lipid	Secondary Bile Acid Metabolism	100004182
	3539	Lipid	Secondary Bile Acid Metabolism	glycodeoxycholate 3-sulfate					1.4746		1.3617	1.5044	0.9058	1.2907	1.3786	1.2271		Lipid	Secondary Bile Acid Metabolism	100006642
	4117	Nucleotide	Purine Metabolism, (Hypo)Xanthine/Inosine containing	inosine 5'-monophosphate (IMP)	C00130	HMDB0000175												Nucleotide	Purine Metabolism, (Hypo)Xanthine/Inosine containing	362
	4118	Nucleotide	Purine Metabolism, (Hypo)Xanthine/Inosine containing	inosine	C00294	HMDB0000195			1.5552		-1.0923	-1.2059	-0.7886		-1.1856	-0.4978		Nucleotide	Purine Metabolism, (Hypo)Xanthine/Inosine containing	361
	4119	Nucleotide	Purine Metabolism, (Hypo)Xanthine/Inosine containing	hypoxanthine	C00262	HMDB0000157		-2.3246	1.09		-2.1276	-2.1548	-1.7821	-2.0897	-2.1129	-1.4696		Nucleotide	Purine Metabolism, (Hypo)Xanthine/Inosine containing	171
	4120	Nucleotide	Purine Metabolism, (Hypo)Xanthine/Inosine containing	xanthine	C00385	HMDB0000292		-2.1822	1.882		-2.3617	-2.4482	-2.1215	-2.5878	-2.6678	-2.2383		Nucleotide	Purine Metabolism, (Hypo)Xanthine/Inosine containing	1004
	4125	Nucleotide	Purine Metabolism, (Hypo)Xanthine/Inosine containing	N1-methylinosine		HMDB0002721		-2.8438	1.6495									Nucleotide	Purine Metabolism, (Hypo)Xanthine/Inosine containing	100001409
	4130	Nucleotide	Purine Metabolism, (Hypo)Xanthine/Inosine containing	urate	C00366	HMDB0000289		-2.1985	1.8688		0.8101	1.7557	0.9553	0.7806	1.114	1.2658		Nucleotide	Purine Metabolism, (Hypo)Xanthine/Inosine containing	1134
	4132	Nucleotide	Purine Metabolism, (Hypo)Xanthine/Inosine containing	allantoin	C02350 C02348 C01551	HMDB0000462		-3.1933	1.6542		0.428	0.7455	0.7974	0.9432	1.1668	1.0094		Nucleotide	Purine Metabolism, (Hypo)Xanthine/Inosine containing	1002
	4137	Nucleotide	Purine Metabolism, Adenine containing	adenosine 5'-diphosphate (ADP)	C00008	HMDB0001341												Nucleotide	Purine Metabolism, Adenine containing	208
	4138	Nucleotide	Purine Metabolism, Adenine containing	adenosine 5'-monophosphate (AMP)	C00020	HMDB0000045		-2.5787	1.207		-2.2906	-1.8408	-1.1436	-2.8053	-2.6053	-1.1007		Nucleotide	Purine Metabolism, Adenine containing	209
	4146	Nucleotide	Purine Metabolism, Adenine containing	adenine	C00147	HMDB0000034		-2.0754	1.9179									Nucleotide	Purine Metabolism, Adenine containing	880
	4152	Nucleotide	Purine Metabolism, Adenine containing	N1-methyladenosine	C02494	HMDB0003331		-2.9043	1.6886		-0.5911	-0.1987	-0.2508	-0.9477	-0.2138	0.4069		Nucleotide	Purine Metabolism, Adenine containing	1242
	4153	Nucleotide	Purine Metabolism, Adenine containing	N6-methyladenosine		HMDB0004044			1.7587									Nucleotide	Purine Metabolism, Adenine containing	213
	4163	Nucleotide	Purine Metabolism, Adenine containing	N6-carbamoylthreonyladenosine		HMDB0041623		-1.9753	2.0729		-0.7172	0.0215	-0.4967	-0.7317	-0.8748	-0.1989		Nucleotide	Purine Metabolism, Adenine containing	100001415
	4173	Nucleotide	Purine Metabolism, Adenine containing	N6-succinyladenosine		HMDB0000912			1.6389		0.2352		0.3455	-0.6492	0.3206	-0.5356		Nucleotide	Purine Metabolism, Adenine containing	100001664
	4177	Nucleotide	Purine Metabolism, Guanine containing	guanosine 3'-monophosphate (3'-GMP)														Nucleotide	Purine Metabolism, Guanine containing	100002704
	4181	Nucleotide	Purine Metabolism, Guanine containing	guanosine	C00387	HMDB0000133												Nucleotide	Purine Metabolism, Guanine containing	1099
	4185	Nucleotide	Purine Metabolism, Guanine containing	7-methylguanine	C02242	HMDB0000897		-2.114	1.936		-1.9941	-1.9306	-2.1727	-2.3723	-1.7686	-2.3571		Nucleotide	Purine Metabolism, Guanine containing	100001456
	4191	Nucleotide	Purine Metabolism, Guanine containing	N2,N2-dimethylguanosine		HMDB0004824		-2.1788	1.9196									Nucleotide	Purine Metabolism, Guanine containing	100001412
	4205	Nucleotide	Pyrimidine Metabolism, Orotate containing	dihydroorotate	C00337	HMDB03349												Nucleotide	Pyrimidine Metabolism, Orotate containing	923
	4206	Nucleotide	Pyrimidine Metabolism, Orotate containing	orotate	C00295	HMDB0000226		-1.869	2.1951		-0.4043	-0.2118	-0.4726	-1.2457	-1.251	-1.2966		Nucleotide	Pyrimidine Metabolism, Orotate containing	445
	4208	Nucleotide	Pyrimidine Metabolism, Orotate containing	orotidine		HMDB0000788		-2.217	2.0643		-0.5026	-0.5473	-0.8939	-1.0982	-1.1931	-0.6883		Nucleotide	Pyrimidine Metabolism, Orotate containing	100001416
	4218	Nucleotide	Pyrimidine Metabolism, Uracil containing	uridine	C00299	HMDB0000296		-2.2545	1.8969		-2.1613	-2.423	-1.6995	-1.146	-2.2508	-1.4547		Nucleotide	Pyrimidine Metabolism, Uracil containing	535
	4219	Nucleotide	Pyrimidine Metabolism, Uracil containing	uracil	C00106	HMDB0000300			2.6714									Nucleotide	Pyrimidine Metabolism, Uracil containing	825
	4220	Nucleotide	Pyrimidine Metabolism, Uracil containing	pseudouridine	C02067	HMDB0000767		-2.0768	1.4402		0.5649	0.7656	0.4548	0.2822	0.6356	0.6725		Nucleotide	Pyrimidine Metabolism, Uracil containing	821
	4222	Nucleotide	Pyrimidine Metabolism, Uracil containing	2'-O-methyluridine					1.6513									Nucleotide	Pyrimidine Metabolism, Uracil containing	100010896
	4223	Nucleotide	Pyrimidine Metabolism, Uracil containing	5-methyluridine (ribothymidine)		HMDB0000884		-2.7814	1.5474		0.2353	0.7606	-0.9859	0.3308	1.0141	0.825		Nucleotide	Pyrimidine Metabolism, Uracil containing	100001446
	4234	Nucleotide	Pyrimidine Metabolism, Uracil containing	2'-deoxyuridine	C00526	HMDB0000012												Nucleotide	Pyrimidine Metabolism, Uracil containing	536
	4237	Nucleotide	Pyrimidine Metabolism, Uracil containing	3-ureidopropionate	C02642	HMDB0000026			1.9338		0.064	-1.0219	-0.2565			-0.1132		Nucleotide	Pyrimidine Metabolism, Uracil containing	1053
	4238	Nucleotide	Pyrimidine Metabolism, Uracil containing	beta-alanine	C00099	HMDB0000056		-2.312	2.3537		-2.2363	-1.2096	-0.8239	-1.1726	-0.0959	-1.2481		Nucleotide	Pyrimidine Metabolism, Uracil containing	244
	4240	Nucleotide	Pyrimidine Metabolism, Uracil containing	N-acetyl-beta-alanine	C01073	HMDB0061880		-2.169	1.9114		1.8957	1.689	-0.1969	0.8538	0.6188	0.5394		Nucleotide	Pyrimidine Metabolism, Uracil containing	100002102
	4246	Nucleotide	Pyrimidine Metabolism, Cytidine containing	cytidine 5'-monophosphate (5'-CMP)	C00055	HMDB0000095												Nucleotide	Pyrimidine Metabolism, Cytidine containing	282
	4250	Nucleotide	Pyrimidine Metabolism, Cytidine containing	cytidine	C00475	HMDB0000089												Nucleotide	Pyrimidine Metabolism, Cytidine containing	827
	4253	Nucleotide	Pyrimidine Metabolism, Cytidine containing	3-methylcytidine		HMDB0240577												Nucleotide	Pyrimidine Metabolism, Cytidine containing	100001466
	4255	Nucleotide	Pyrimidine Metabolism, Cytidine containing	N4-acetylcytidine		HMDB0005923		-2.4416	1.9386									Nucleotide	Pyrimidine Metabolism, Cytidine containing	100001413
	4263	Nucleotide	Pyrimidine Metabolism, Cytidine containing	2'-O-methylcytidine					1.2322									Nucleotide	Pyrimidine Metabolism, Cytidine containing	100010895
	4273	Nucleotide	Pyrimidine Metabolism, Thymine containing	thymidine	C00214	HMDB0000273												Nucleotide	Pyrimidine Metabolism, Thymine containing	872
	4276	Nucleotide	Pyrimidine Metabolism, Thymine containing	thymine	C00178	HMDB0000262												Nucleotide	Pyrimidine Metabolism, Thymine containing	882
	4279	Nucleotide	Pyrimidine Metabolism, Thymine containing	5,6-dihydrothymine	C00906	HMDB0000079		-2.0926	1.8893		-1.6296	-1.1152	-1.2079	-0.6687	-1.7229	-1.4253		Nucleotide	Pyrimidine Metabolism, Thymine containing	158
	4282	Nucleotide	Pyrimidine Metabolism, Thymine containing	3-aminoisobutyrate	C05145	HMDB0002166		-2.2226	1.6465		-0.0495	0.0608	-0.0958	-0.3215	0.5469	-0.0739		Nucleotide	Pyrimidine Metabolism, Thymine containing	1114
	4299	Cofactors and Vitamins	Nicotinate and Nicotinamide Metabolism	quinolinate	C03722	HMDB0000232			1.7113		-1.7601	-1.9973	-1.4641	-2.0565	-2.7379	-2.3248		Cofactors and Vitamins	Nicotinate and Nicotinamide Metabolism	182
	4303	Cofactors and Vitamins	Nicotinate and Nicotinamide Metabolism	nicotinamide	C00153	HMDB0001406		-2.4548	1.3528		-2.1413	-2.2018	-1.5533	-2.1002	-2.0232	-1.8255		Cofactors and Vitamins	Nicotinate and Nicotinamide Metabolism	432
	4306	Cofactors and Vitamins	Nicotinate and Nicotinamide Metabolism	nicotinamide riboside	C03150	HMDB0000855			1.5191									Cofactors and Vitamins	Nicotinate and Nicotinamide Metabolism	100001310
	4315	Cofactors and Vitamins	Nicotinate and Nicotinamide Metabolism	1-methylnicotinamide	C02918	HMDB0000699		-1.8046	1.9644		-1.1216	-1.2265	0.1721	-0.2789	-1.6098	-0.3078		Cofactors and Vitamins	Nicotinate and Nicotinamide Metabolism	55
	4321	Cofactors and Vitamins	Nicotinate and Nicotinamide Metabolism	trigonelline (N'-methylnicotinate)	C01004	HMDB0000875		-2.2435	1.8996		0.574	0.3858	0.9672	1.0169	0.8197	1.0644		Cofactors and Vitamins	Nicotinate and Nicotinamide Metabolism	100001092
	4323	Cofactors and Vitamins	Nicotinate and Nicotinamide Metabolism	N1-Methyl-2-pyridone-5-carboxamide	C05842	HMDB0004193		-2.0451	1.9291		0.7551	0.6977	0.1179	0.3472	0.2095	0.1823		Cofactors and Vitamins	Nicotinate and Nicotinamide Metabolism	100001468
	4332	Cofactors and Vitamins	Riboflavin Metabolism	flavin adenine dinucleotide (FAD)	C00016	HMDB0001248			1.8045									Cofactors and Vitamins	Riboflavin Metabolism	327
	4335	Cofactors and Vitamins	Pantothenate and CoA Metabolism	pantothenate	C00864	HMDB0000210		-1.9946	1.7663		1.4451	1.6544	1.826	1.718	0.8796	1.0163		Cofactors and Vitamins	Pantothenate and CoA Metabolism	1024
	4352	Cofactors and Vitamins	Ascorbate and Aldarate Metabolism	threonate	C01620	HMDB0000943 HMDB0062620		-2.5787	1.6866		-0.6396	-0.9203	-0.6987	-0.9551	-0.0944	1.7846		Cofactors and Vitamins	Ascorbate and Aldarate Metabolism	100001022
	4355	Cofactors and Vitamins	Ascorbate and Aldarate Metabolism	oxalate (ethanedioate)	C00209	HMDB0002329		-2.528	1.7272		-0.6394	-0.5829	0.0138	-0.5595	1.223	1.2168		Cofactors and Vitamins	Ascorbate and Aldarate Metabolism	100000841
	4356	Cofactors and Vitamins	Ascorbate and Aldarate Metabolism	gulonate*	C00800	HMDB0003290			1.583		0.3888	0.4127	0.7805	0.1905	0.6948	0.1831		Cofactors and Vitamins	Ascorbate and Aldarate Metabolism	100001586
	4359	Cofactors and Vitamins	Tocopherol Metabolism	alpha-tocopherol	C02477	HMDB0001893		-3.0566	1.6689		3.0686	5.0706	3.6422	4.5969	3.7985	4.8248		Cofactors and Vitamins	Tocopherol Metabolism	1105
	4363	Cofactors and Vitamins	Tocopherol Metabolism	delta-tocopherol	C14151	HMDB0002902			1.7101		0.0278	1.2772	0.2085	0.9617	0.5026	0.9217		Cofactors and Vitamins	Tocopherol Metabolism	100001216
	4367	Cofactors and Vitamins	Tocopherol Metabolism	gamma-CEHC		HMDB0001931		-2.0385	1.8278		0.324	0.0052	0.5185	0.4602	0.4512	0.6135		Cofactors and Vitamins	Tocopherol Metabolism	100002094
	4368	Cofactors and Vitamins	Tocopherol Metabolism	gamma-CEHC glucuronide*					1.6594									Cofactors and Vitamins	Tocopherol Metabolism	100004243
	4370	Cofactors and Vitamins	Tocopherol Metabolism	alpha-CEHC sulfate														Cofactors and Vitamins	Tocopherol Metabolism	100005972
	4381	Cofactors and Vitamins	Tocopherol Metabolism	gamma-tocopherol/beta-tocopherol	C14152 C02483	HMDB0006335 HMDB0001492		-2.2365	1.7683		-2.6756	-0.3026	-2.6518	-0.8888	-1.8339	-0.5312		Cofactors and Vitamins	Tocopherol Metabolism	100008998
	4406	Cofactors and Vitamins	Hemoglobin and Porphyrin Metabolism	heme	C00032	HMDB0003178												Cofactors and Vitamins	Hemoglobin and Porphyrin Metabolism	100001386
	4407	Cofactors and Vitamins	Hemoglobin and Porphyrin Metabolism	bilirubin (Z,Z)	C00486	HMDB0000054		-3.349	1.7887									Cofactors and Vitamins	Hemoglobin and Porphyrin Metabolism	1090
	4408	Cofactors and Vitamins	Hemoglobin and Porphyrin Metabolism	bilirubin (E,E)*					1.6839		-0.7727	-0.0304	-0.2796	-0.2366	-0.7652	-0.2558		Cofactors and Vitamins	Hemoglobin and Porphyrin Metabolism	100001950
	4409	Cofactors and Vitamins	Hemoglobin and Porphyrin Metabolism	bilirubin (E,Z or Z,E)*	C00486	HMDB0000488			1.6997									Cofactors and Vitamins	Hemoglobin and Porphyrin Metabolism	100001951
	4410	Cofactors and Vitamins	Hemoglobin and Porphyrin Metabolism	biliverdin	C00500	HMDB0001008		-1.8139	2.0241									Cofactors and Vitamins	Hemoglobin and Porphyrin Metabolism	250
	4411	Cofactors and Vitamins	Hemoglobin and Porphyrin Metabolism	I-urobilinogen	C05789	HMDB0004157			1.711									Cofactors and Vitamins	Hemoglobin and Porphyrin Metabolism	100001226
	4413	Cofactors and Vitamins	Hemoglobin and Porphyrin Metabolism	L-urobilin	C05793	HMDB0004159												Cofactors and Vitamins	Hemoglobin and Porphyrin Metabolism	100002568
	4427	Cofactors and Vitamins	Vitamin A Metabolism	4-oxo-retinoic acid		HMDB0006285			1.9484									Cofactors and Vitamins	Vitamin A Metabolism	100002825
	4428	Cofactors and Vitamins	Vitamin A Metabolism	retinol (Vitamin A)	C00473	HMDB0000305		-2.3115	2.2685		-1.2978	0.1987	0.2247	0.0516	0.3694	0.2463		Cofactors and Vitamins	Vitamin A Metabolism	498
	4430	Cofactors and Vitamins	Vitamin A Metabolism	carotene diol (1)				-2.3605	2.0643		2.6599	2.6888	2.5876	2.5866	4.0925	4.1381		Cofactors and Vitamins	Vitamin A Metabolism	100015966
	4431	Cofactors and Vitamins	Vitamin A Metabolism	carotene diol (2)				-2.2675	2.0028		2.6843	2.4407	2.3502	2.4585	4.0939	4.0635		Cofactors and Vitamins	Vitamin A Metabolism	100015967
	4432	Cofactors and Vitamins	Vitamin A Metabolism	carotene diol (3)					1.5632		1.4654	1.4758	1.3633	1.3919	2.4216	2.3587		Cofactors and Vitamins	Vitamin A Metabolism	100015968
	4434	Cofactors and Vitamins	Vitamin A Metabolism	beta-cryptoxanthin	C08591	HMDB0033844		-2.4488	1.846		-0.3074	-0.2258	0.006	-0.1827	0.7263	0.3733		Cofactors and Vitamins	Vitamin A Metabolism	100001977
	4450	Cofactors and Vitamins	Vitamin B6 Metabolism	pyridoxate	C00847	HMDB0000017		-1.9576	2.4427		2.38	1.4931	2.4301	2.0919	0.4218	0.3694		Cofactors and Vitamins	Vitamin B6 Metabolism	100001121
	4461	Xenobiotics	Benzoate Metabolism	hippurate	C01586	HMDB0000714		-1.8376	2.0467		1.8848	-1.4935	0.3018	-0.9189	0.7201	0.5111		Xenobiotics	Benzoate Metabolism	100000014
	4465	Xenobiotics	Benzoate Metabolism	2-hydroxyhippurate (salicylurate)	C07588	HMDB0000840			2.2454		-0.4156	-1.267	-0.1394	-1.1112	-0.5167	-0.424		Xenobiotics	Benzoate Metabolism	1869
	4467	Xenobiotics	Benzoate Metabolism	3-hydroxyhippurate		HMDB0006116			1.7082		1.0122	0.9228	1.0567	-0.8519	-0.3959	0.0439		Xenobiotics	Benzoate Metabolism	100002122
	4469	Xenobiotics	Benzoate Metabolism	4-hydroxyhippurate		HMDB0013678		-1.7981	1.9561		0.1305	0.1324	0.2428	-0.8186	-0.3746	-0.0473		Xenobiotics	Benzoate Metabolism	100001423
	4475	Xenobiotics	Benzoate Metabolism	benzoate	C00180	HMDB0001870			1.5861		-1.2883	-1.4948	-1.3287	-1.7147	-1.5495	-1.6703		Xenobiotics	Benzoate Metabolism	100000008
	4497	Xenobiotics	Benzoate Metabolism	catechol sulfate		HMDB0059724		-2.1459	2.0463		0.9086	0.1772	1.3555	0.8698	1.0239	1.1573		Xenobiotics	Benzoate Metabolism	100001605
	4500	Xenobiotics	Benzoate Metabolism	guaiacol sulfate		HMDB0060013		-2.0275	2.1526		1.3696	0.5409	1.8751	1.9555	1.1897	1.6688		Xenobiotics	Benzoate Metabolism	100004208
	4501	Xenobiotics	Benzoate Metabolism	3-methyl catechol sulfate (1)					1.829		-0.6999	-0.8375	-0.253	-0.469	-0.4056	-0.1482		Xenobiotics	Benzoate Metabolism	100004112
	4502	Xenobiotics	Benzoate Metabolism	3-methyl catechol sulfate (2)					1.7459									Xenobiotics	Benzoate Metabolism	100004110
	4504	Xenobiotics	Benzoate Metabolism	4-methylcatechol sulfate		HMDB0240459		-2.1574	1.5815		1.5715	1.5052	1.2579	1.2339	1.2315	1.7498		Xenobiotics	Benzoate Metabolism	100004111
	4516	Xenobiotics	Benzoate Metabolism	4-acetylphenol sulfate					1.8249									Xenobiotics	Benzoate Metabolism	100000711
	4519	Xenobiotics	Benzoate Metabolism	2-ethylphenylsulfate					1.9781									Xenobiotics	Benzoate Metabolism	100001809
	4522	Xenobiotics	Benzoate Metabolism	4-ethylphenylsulfate	C13637	HMDB0062551		-2.2817	2.3022		0.8166	0.7853	-1.1546	-1.5455	-0.7028	-0.5584		Xenobiotics	Benzoate Metabolism	100001756
	4524	Xenobiotics	Benzoate Metabolism	4-vinylphenol sulfate	C05627	HMDB0062775		-1.8189	2.1124		-1.5732	-1.5491	0.0467	-0.8684	-0.7259	-0.9346		Xenobiotics	Benzoate Metabolism	100001755
	4540	Xenobiotics	Benzoate Metabolism	3-methoxycatechol sulfate (1)					1.8497		0.9235	-0.2369	0.171	-0.4302	0.435	0.5002		Xenobiotics	Benzoate Metabolism	100006375
	4541	Xenobiotics	Benzoate Metabolism	3-methoxycatechol sulfate (2)														Xenobiotics	Benzoate Metabolism	100006376
	4543	Xenobiotics	Benzoate Metabolism	methyl-4-hydroxybenzoate sulfate		HMDB0041646		-1.944	1.3119		-2.0015	-2.1356	-1.72	-1.9681	-2.0047	-0.1798		Xenobiotics	Benzoate Metabolism	100006116
	4545	Xenobiotics	Benzoate Metabolism	propyl 4-hydroxybenzoate sulfate		HMDB0135261			1.6829									Xenobiotics	Benzoate Metabolism	100006264
	4551	Xenobiotics	Benzoate Metabolism	p-cresol sulfate		HMDB0011635		-2.4374	1.2493		1.121	1.3596	1.1719	1.0592	0.9775	1.4853		Xenobiotics	Benzoate Metabolism	100001315
	4558	Xenobiotics	Benzoate Metabolism	o-cresol sulfate		HMDB0011635			2.2255		-0.4469		0.0681	-0.0525	-0.0394	-0.167		Xenobiotics	Benzoate Metabolism	100001806
	4567	Xenobiotics	Benzoate Metabolism	3-(3-hydroxyphenyl)propionate sulfate		HMDB0094710			1.6693									Xenobiotics	Benzoate Metabolism	100005391
	4570	Xenobiotics	Benzoate Metabolism	3-(3-hydroxyphenyl)propionate	C11457	HMDB0000375			1.9269		0.8421	0.6502	0.5528			-0.5956		Xenobiotics	Benzoate Metabolism	100001624
	4572	Xenobiotics	Benzoate Metabolism	3-(4-hydroxyphenyl)propionate	C01744	HMDB0002199												Xenobiotics	Benzoate Metabolism	100002914
	4573	Xenobiotics	Benzoate Metabolism	3-phenylpropionate (hydrocinnamate)	C05629	HMDB0000764			1.5955		0.2256		0.5842	0.7638	0.6229	0.7519		Xenobiotics	Benzoate Metabolism	100000010
	4589	Xenobiotics	Xanthine Metabolism	caffeine	C07481	HMDB0001847			1.8067									Xenobiotics	Xanthine Metabolism	849
	4590	Xenobiotics	Xanthine Metabolism	paraxanthine	C13747	HMDB0001860			1.7348									Xenobiotics	Xanthine Metabolism	100000453
	4591	Xenobiotics	Xanthine Metabolism	theobromine	C07480	HMDB0002825			1.5428									Xenobiotics	Xanthine Metabolism	100000445
	4592	Xenobiotics	Xanthine Metabolism	theophylline	C07130	HMDB0001889			1.8308									Xenobiotics	Xanthine Metabolism	100000437
	4593	Xenobiotics	Xanthine Metabolism	1-methylurate	C16359	HMDB0003099			1.8662									Xenobiotics	Xanthine Metabolism	100001400
	4595	Xenobiotics	Xanthine Metabolism	1,3-dimethylurate		HMDB0001857			1.851									Xenobiotics	Xanthine Metabolism	100001106
	4596	Xenobiotics	Xanthine Metabolism	1,7-dimethylurate	C16356	HMDB0011103			1.7512									Xenobiotics	Xanthine Metabolism	100001399
	4597	Xenobiotics	Xanthine Metabolism	3,7-dimethylurate	C16360	HMDB0001982			1.7957									Xenobiotics	Xanthine Metabolism	100001398
	4598	Xenobiotics	Xanthine Metabolism	1,3,7-trimethylurate	C16361	HMDB0002123			1.7317									Xenobiotics	Xanthine Metabolism	100001397
	4599	Xenobiotics	Xanthine Metabolism	1-methylxanthine	C16358	HMDB0010738			1.7641									Xenobiotics	Xanthine Metabolism	100001405
	4600	Xenobiotics	Xanthine Metabolism	3-methylxanthine	C16357	HMDB0001886			1.585									Xenobiotics	Xanthine Metabolism	100001108
	4601	Xenobiotics	Xanthine Metabolism	7-methylxanthine	C16353	HMDB0001991			1.6492									Xenobiotics	Xanthine Metabolism	100001396
	4602	Xenobiotics	Xanthine Metabolism	5-acetylamino-6-amino-3-methyluracil	C16366	HMDB0004400			1.7063									Xenobiotics	Xanthine Metabolism	100001403
	4609	Xenobiotics	Tobacco Metabolite	cotinine		HMDB0001046			1.7104									Xenobiotics	Tobacco Metabolite	848
	4610	Xenobiotics	Tobacco Metabolite	hydroxycotinine		HMDB0001390			1.8036									Xenobiotics	Tobacco Metabolite	100002717
	4611	Xenobiotics	Tobacco Metabolite	cotinine N-oxide		HMDB0001411												Xenobiotics	Tobacco Metabolite	100002719
	4613	Xenobiotics	Tobacco Metabolite	3-hydroxycotinine glucuronide		HMDB0001204												Xenobiotics	Tobacco Metabolite	100004494
	4635	Xenobiotics	Food Component/Plant	2-piperidinone		HMDB0011749		-1.7102	1.571		1.1629	0.9075	2.0172	2.0787	-1.4366	-1.4057		Xenobiotics	Food Component/Plant	100004295
	4681	Xenobiotics	Food Component/Plant	sucralose	C12285	HMDB0031554			1.7873									Xenobiotics	Food Component/Plant	100001789
	4771	Xenobiotics	Food Component/Plant	2,3-dihydroxyisovalerate	C04039	HMDB0012141			1.9111		-0.0727	-0.2337	-0.435	-0.6679	0.0308	-0.0667		Xenobiotics	Food Component/Plant	100002417
	4776	Xenobiotics	Food Component/Plant	2,8-quinolinediol sulfate														Xenobiotics	Food Component/Plant	100004321
	4804	Xenobiotics	Food Component/Plant	gluconate	C00257	HMDB0000625			1.5283									Xenobiotics	Food Component/Plant	338
	4815	Xenobiotics	Food Component/Plant	alliin	C08265	HMDB0033592			1.7726									Xenobiotics	Food Component/Plant	100003473
	4816	Xenobiotics	Food Component/Plant	N-acetylalliin					1.6934									Xenobiotics	Food Component/Plant	100005367
	4852	Xenobiotics	Food Component/Plant	cinnamoylglycine		HMDB0011621			1.856		-0.3413		0.3082	0.5126	0.281	0.2884		Xenobiotics	Food Component/Plant	100002253
	4878	Xenobiotics	Food Component/Plant	dihydroferulate		HMDB0062121			1.6629						0.6117	0.2033		Xenobiotics	Food Component/Plant	100003432
	4892	Xenobiotics	Food Component/Plant	ergothioneine	C05570	HMDB0003045		-2.588	1.8529		-1.3206	-1.4319	-1.3711	-1.3631	-1.4507	-1.5183		Xenobiotics	Food Component/Plant	100002154
	4894	Xenobiotics	Food Component/Plant	erythritol	C00503	HMDB0002994			2.3274		0.7452	0.3684	0.271	0.0992	0.6161	0.3781		Xenobiotics	Food Component/Plant	100000846
	4900	Xenobiotics	Food Component/Plant	ferulic acid 4-sulfate		HMDB0029200			1.6257		-0.1873	-0.3963	0.3309	0.025	-0.5974	-0.7315		Xenobiotics	Food Component/Plant	100005389
	4904	Xenobiotics	Food Component/Plant	quinate	C00296	HMDB0003072			1.8507		0.7018	0.1168	-0.3282		0.4943	0.536		Xenobiotics	Food Component/Plant	100000442
	4932	Xenobiotics	Food Component/Plant	homostachydrine*	C08283	HMDB0033433		-2.0764	1.7251		-2.0388	-1.9528	-0.1831	-0.1989	-1.7687	-1.9745		Xenobiotics	Food Component/Plant	100001550
	4933	Xenobiotics	Food Component/Plant	hydroquinone beta-D-glucopyranoside	C06186	HMDB29943												Xenobiotics	Food Component/Plant	100002220
	4937	Xenobiotics	Food Component/Plant	indolin-2-one	C12312				1.572		1.1878	1.4583	1.483	1.4953	1.1341	1.3135		Xenobiotics	Food Component/Plant	100004318
	4962	Xenobiotics	Food Component/Plant	methyl indole-3-acetate		HMDB0029738			2.0374									Xenobiotics	Food Component/Plant	1104
	4966	Xenobiotics	Food Component/Plant	N-(2-furoyl)glycine		HMDB0000439			2.0906		-0.1968	0.8109	0.7059	0.7473	1.2424	1.5676		Xenobiotics	Food Component/Plant	100001086
	4998	Xenobiotics	Food Component/Plant	phytanate	C01607	HMDB0000801		-1.8361	1.9271		-1.3054	-0.2698	-0.9045	-1.1857	-0.7711	-1.2617		Xenobiotics	Food Component/Plant	466
	5004	Xenobiotics	Food Component/Plant	piperine	C03882	HMDB0029377			1.6113									Xenobiotics	Food Component/Plant	100001267
	5040	Xenobiotics	Food Component/Plant	saccharin	C12283	HMDB0029723			1.7146		1.2097	1.0305	1.4791	1.3158	1.2823	1.1431		Xenobiotics	Food Component/Plant	100000870
	5042	Xenobiotics	Food Component/Plant	acesulfame		HMDB0033585			1.722									Xenobiotics	Food Component/Plant	100006203
	5043	Xenobiotics	Food Component/Plant	S-allylcysteine		HMDB0034323			1.7624									Xenobiotics	Food Component/Plant	100004509
	5054	Xenobiotics	Food Component/Plant	solanidine	C06543	HMDB0003236			1.866									Xenobiotics	Food Component/Plant	100002773
	5062	Xenobiotics	Food Component/Plant	stachydrine	C10172	HMDB0004827		-1.4551	1.7783		-1.2606	-0.5399	-0.9576	-1.3264	-1.3688	-1.5793		Xenobiotics	Food Component/Plant	100001296
	5072	Xenobiotics	Food Component/Plant	tartarate	C00552 C00898 C02107	HMDB0062642 HMDB0000956			2.6792		-0.2443	1.4473	-0.0321	-0.3443	1.6059	4.6291		Xenobiotics	Food Component/Plant	100000295
	5076	Xenobiotics	Food Component/Plant	thymol sulfate	C09908	HMDB0062720			2.1178		-0.7235	-1.3613	0.0691	-0.2927	-1.4175			Xenobiotics	Food Component/Plant	100001757
	5087	Xenobiotics	Food Component/Plant	4-allylphenol sulfate				-2.0321	1.7088		-0.6754	0.7347	-1.5812	-0.9354	-0.2457	-0.2612		Xenobiotics	Food Component/Plant	100001868
	5089	Xenobiotics	Food Component/Plant	methyl glucopyranoside (alpha + beta)		HMDB0029965			2.1866		1.5971	1.1932	0.8979	1.1162	1.658	1.322		Xenobiotics	Food Component/Plant	100005864
	5115	Xenobiotics	Food Component/Plant	4-vinylguaiacol sulfate		HMDB0127980			1.717				0.4946	0.0952	-0.3212	-0.5275		Xenobiotics	Food Component/Plant	100006126
	5116	Xenobiotics	Food Component/Plant	pyrraline	C21013	HMDB0033143			1.7731		0.0293	0.2533	0.6912	0.5513	-0.0031	0.0464		Xenobiotics	Food Component/Plant	100001767
	5118	Xenobiotics	Food Component/Plant	umbelliferone sulfate		HMDB0240565			1.909		0.1493	0.3867	0.3395	0.3306	0.4271	0.4006		Xenobiotics	Food Component/Plant	100006282
	5119	Xenobiotics	Food Component/Plant	daidzein sulfate (2)					1.7564									Xenobiotics	Food Component/Plant	100006363
	5121	Xenobiotics	Food Component/Plant	eugenol sulfate		HMDB0135245			1.7495		-0.5974			-0.1927	0.3561	0.4024		Xenobiotics	Food Component/Plant	100006171
	5130	Xenobiotics	Food Component/Plant	isoeugenol sulfate					1.8668									Xenobiotics	Food Component/Plant	100006089
	5150	Xenobiotics	Food Component/Plant	trans-3,4-methyleneheptanoate					1.5193		1.2495	1.3896	0.7843	0.8283	0.0251	0.192		Xenobiotics	Food Component/Plant	100006651
	5202	Xenobiotics	Food Component/Plant	caffeic acid sulfate		HMDB0041708			1.5888		0.8828	0.6718	0.9181	0.7083		0.4085		Xenobiotics	Food Component/Plant	100009337
	5205	Xenobiotics	Food Component/Plant	tartronate (hydroxymalonate)	C02287	HMDB0035227			1.4725		1.5286	1.96	2.0272	1.5918	1.4181	0.9171		Xenobiotics	Food Component/Plant	100000840
	5248	Xenobiotics	Food Component/Plant	2-acetamidophenol sulfate														Xenobiotics	Food Component/Plant	100006190
	5249	Xenobiotics	Food Component/Plant	2-aminophenol sulfate		HMDB0061116		-1.9799	2.0498		1.1964	0.3153	1.3196	0.8044	0.9194	0.7694		Xenobiotics	Food Component/Plant	100004322
	5327	Xenobiotics	Bacterial/Fungal	N-methylpipecolate					1.9252		0.2648	1.2359	0.6998	1.0826	0.8491	1.3718		Xenobiotics	Bacterial/Fungal	100005383
	5373	Xenobiotics	Drug - Analgesics, Anesthetics	4-acetamidophenol	C06804	HMDB0001859			1.8731		1.6247		1.954	1.5604	1.156	1.2462		Xenobiotics	Drug - Analgesics, Anesthetics	1383
	5375	Xenobiotics	Drug - Analgesics, Anesthetics	3-(N-acetyl-L-cystein-S-yl) acetaminophen					1.7273									Xenobiotics	Drug - Analgesics, Anesthetics	2048
	5376	Xenobiotics	Drug - Analgesics, Anesthetics	4-acetaminophen sulfate	C06804	HMDB0059911			1.7601		1.5832		1.7938	1.523	1.1891	1.2146		Xenobiotics	Drug - Analgesics, Anesthetics	2049
	5377	Xenobiotics	Drug - Analgesics, Anesthetics	4-acetamidophenylglucuronide		HMDB0010316			1.7714		1.5888		1.8777	1.513	1.221	1.226		Xenobiotics	Drug - Analgesics, Anesthetics	100000043
	5378	Xenobiotics	Drug - Analgesics, Anesthetics	2-hydroxyacetaminophen sulfate*		HMDB0062547			1.8148		1.6943		1.9122	1.5813	1.2567	1.3034		Xenobiotics	Drug - Analgesics, Anesthetics	100001791
	5379	Xenobiotics	Drug - Analgesics, Anesthetics	2-methoxyacetaminophen sulfate*		HMDB0062550			1.7695		1.6177		1.7757	1.522	1.3217	1.3497		Xenobiotics	Drug - Analgesics, Anesthetics	100001793
	5380	Xenobiotics	Drug - Analgesics, Anesthetics	2-methoxyacetaminophen glucuronide*		HMDB0240215			1.8176									Xenobiotics	Drug - Analgesics, Anesthetics	100001795
	5381	Xenobiotics	Drug - Analgesics, Anesthetics	3-(cystein-S-yl)acetaminophen*		HMDB0240217			1.8184									Xenobiotics	Drug - Analgesics, Anesthetics	100001797
	5388	Xenobiotics	Drug - Analgesics, Anesthetics	4-aminophenol sulfate (2)														Xenobiotics	Drug - Analgesics, Anesthetics	100010871
	5393	Xenobiotics	Drug - Analgesics, Anesthetics	ibuprofen	C01588	HMDB0001925												Xenobiotics	Drug - Analgesics, Anesthetics	1487
	5394	Xenobiotics	Drug - Analgesics, Anesthetics	2-hydroxyibuprofen		HMDB0060920												Xenobiotics	Drug - Analgesics, Anesthetics	100004169
	5396	Xenobiotics	Drug - Analgesics, Anesthetics	carboxyibuprofen		HMDB0060564												Xenobiotics	Drug - Analgesics, Anesthetics	100004171
	5398	Xenobiotics	Drug - Analgesics, Anesthetics	ibuprofen acyl glucuronide		HMDB0010343												Xenobiotics	Drug - Analgesics, Anesthetics	100002406
	5403	Xenobiotics	Drug - Analgesics, Anesthetics	salicyluric glucuronide*		HMDB0240252			1.9624									Xenobiotics	Drug - Analgesics, Anesthetics	100001332
	5456	Xenobiotics	Drug - Antibiotic	amoxicillin	D00229 C06827 DG00520	HMDB0015193												Xenobiotics	Drug - Antibiotic	100008962
	5654	Xenobiotics	Drug - Cardiovascular	4-hydroxycoumarin	C20414				1.8905									Xenobiotics	Drug - Cardiovascular	100002049
	5748	Xenobiotics	Drug - Gastrointestinal	dexlansoprazole	D08903													Xenobiotics	Drug - Gastrointestinal	100015794
	5830	Xenobiotics	Drug - Neurological	levetiracetam	C07841	HMDB0015333												Xenobiotics	Drug - Neurological	100015873
	5933	Xenobiotics	Drug - Respiratory	cetirizine	C07778	HMDB0005032												Xenobiotics	Drug - Respiratory	100009034
	5947	Xenobiotics	Drug - Respiratory	guaifenesin	D00337	HMDB0004998												Xenobiotics	Drug - Respiratory	100004286
	5958	Xenobiotics	Drug - Topical Agents	salicylate	C00805	HMDB0001895		-1.7239	2.4627		0.1956	-0.8797	0.1038	-0.5473	-0.1608	0.2307		Xenobiotics	Drug - Topical Agents	501
	5964	Xenobiotics	Drug - Topical Agents	hydroquinone sulfate	C00530	HMDB0240263			2.3012		-0.4474	1.2839	1.3532	1.076	-0.0018	1.2073		Xenobiotics	Drug - Topical Agents	100001604
	6085	Xenobiotics	Chemical	sulfate*	C00059	HMDB01448		-2.3299	1.9059		-0.1402	0.9114	0.8779	-0.0806	0.8578	-0.1048		Xenobiotics	Chemical	100002528
	6088	Xenobiotics	Chemical	O-sulfo-L-tyrosine				-2.0589	1.7773		0.6809	0.5087	0.2073	0.0996	0.4275	-0.026		Xenobiotics	Chemical	100005384
	6092	Xenobiotics	Chemical	ethyl glucuronide		HMDB0010325												Xenobiotics	Chemical	100002849
	6151	Xenobiotics	Chemical	dimethyl sulfone	C11142	HMDB0004983		-3.0922	2.1368		0.2097	0.0993	-0.4525					Xenobiotics	Chemical	100004284
	6153	Xenobiotics	Chemical	ectoine	C06231				1.821									Xenobiotics	Chemical	100001635
	6154	Xenobiotics	Chemical	EDTA	C00284	HMDB0015109		-3.0849	2.4585		4.4077	0.7767	-0.4537	3.1812	3.1462	4.8184		Xenobiotics	Chemical	100001002
	6162	Xenobiotics	Chemical	HEPES														Xenobiotics	Chemical	100000843
	6163	Xenobiotics	Chemical	iminodiacetate (IDA)	C19911	HMDB0011753		-2.176	1.3739		-0.2074	-0.5971	-0.3015	1.0526	2.1678	-0.8545		Xenobiotics	Chemical	100000900
	6188	Xenobiotics	Chemical	benzoylcarnitine*														Xenobiotics	Chemical	100004555
	6189	Xenobiotics	Chemical	perfluorooctanesulfonate (PFOS)	C18142	HMDB0059586		-1.8081	1.8614		-1.6969	-1.3319	-1.5685	-1.5343	-2.0652	-1.6606		Xenobiotics	Chemical	100010955
	6199	Xenobiotics	Chemical	succinamic acid					1.8023		0.0415	-0.3185	-0.7426	0.0574	-0.6711	-0.3947		Xenobiotics	Chemical	100021921
	6212	Xenobiotics	Chemical	4-hydroxychlorothalonil				-2.2512	2.1034		0.7302	1.086	1.4975	1.3915	1.2386	0.9143		Xenobiotics	Chemical	100006082
	6217	Xenobiotics	Chemical	1,2,3-benzenetriol sulfate (2)		HMDB0060018 HMDB0060016			1.8671		1.3032	-0.0189	0.1492	-0.4994	-0.0386	0.0949		Xenobiotics	Chemical	100006374
	6219	Xenobiotics	Chemical	2-methoxyresorcinol sulfate														Xenobiotics	Chemical	100006184
	6220	Xenobiotics	Chemical	3-hydroxypyridine sulfate					2.6282		-1.0708	-1.0438	-0.0353	-0.2392	-0.5423	-0.3697		Xenobiotics	Chemical	100006098
	6234	Xenobiotics	Chemical	6-hydroxyindole sulfate		HMDB0000682		-2.6809	1.5976		1.3645	1.7022	1.619	1.0194	0.9903	1.3566		Xenobiotics	Chemical	100006260
	6238	Xenobiotics	Chemical	thioproline														Xenobiotics	Chemical	100009232
	6450	Partially Characterized Molecules	Partially Characterized Molecules	glutamine_degradant*				-1.3797	3.7714									Partially Characterized Molecules	Partially Characterized Molecules	100001540

## Sheet: Merged Z-scores
	Single patient DFMO- Batch 1
	Z-score table of identified biochemicals for each subject against a healthy control population of pediatric subjects. Red and green shaded cells indicate z-score > 97.5th percentile and z-score < 2.5th percentile, respectively.
								Reference Range 866 Pediatric Cohort			Z-scores
	Pathway Sort Order	Super Pathway	Sub Pathway	Biochemical Name	KEGG	HMDB	X	2.5th Percentile	97.5th Percentile	X	Pre-DFMO	1st	2nd	3rd	4th	5th	X	Super Pathway	Sub Pathway	Chemical ID
	1	Amino Acid	Glycine, Serine and Threonine Metabolism	glycine	C00037	HMDB0000123		-1.8533	2.1867		-0.1133	-0.2711	0.1564	-0.3333	0.2056	0.4168		Amino Acid	Glycine, Serine and Threonine Metabolism	340
	2			N-acetylglycine		HMDB0000532		-1.9122	2.7467		-0.6173	0.6393	0.8319	0.2129	0.6168	0.114		Amino Acid	Glycine, Serine and Threonine Metabolism	100001006
	5			sarcosine	C00213	HMDB0000271		-2.1751	1.532		0.341	0.016	-0.0421	1.3661	2.1449	-0.3116		Amino Acid	Glycine, Serine and Threonine Metabolism	1023
	6			dimethylglycine	C03626	HMDB0000092		-1.8418	2.2041		-0.3875	1.2931	0.2856	0.6114	0.8977	0.4222		Amino Acid	Glycine, Serine and Threonine Metabolism	806
	7			betaine	C00719	HMDB0000043		-1.9649	1.9466		0.178	0.0742	-0.4429	0.1891	-0.832	0.0359		Amino Acid	Glycine, Serine and Threonine Metabolism	799
	10			serine	C00065	HMDB0000187		-2.1623	1.8634		-1.4579	-1.3218	-0.5365	-1.2359	-0.2349	0.0091		Amino Acid	Glycine, Serine and Threonine Metabolism	503
	11			N-acetylserine		HMDB0002931		-1.9054	1.8623		-0.7753	-0.4252	-0.8571	-1.2383	-0.8068	-1.0918		Amino Acid	Glycine, Serine and Threonine Metabolism	100001851
	16			2-methylserine	C02115			-2.1679	1.4066									Amino Acid	Glycine, Serine and Threonine Metabolism	100009246
	17			threonine	C00188	HMDB0000167		-2.1339	1.9742		-1.3027	-1.2272	-0.2529	-0.6355	0.0791	-0.5073		Amino Acid	Glycine, Serine and Threonine Metabolism	564
	18			N-acetylthreonine		HMDB0062557		-2.2102	1.9437		-2.6708	-0.8723	-0.9169	-1.4397	-1.138	-0.9831		Amino Acid	Glycine, Serine and Threonine Metabolism	100001274
	29		Alanine and Aspartate Metabolism	alanine	C00041	HMDB0000161		-1.924	2.0076		-0.5569	-0.7319	-0.469	-0.4556	-1.1374	0.3781		Amino Acid	Alanine and Aspartate Metabolism	811
	31			N-acetylalanine	C02847	HMDB0000766		-2.0233	1.9214		-0.457	-0.5083	-1.4367	-0.9993	-0.6056	-0.5937		Amino Acid	Alanine and Aspartate Metabolism	1110
	36			aspartate	C00049	HMDB0000191		-1.9635	1.5773		-0.8603	-0.6308	-0.7165	-1.3113	-1.2568	-0.8455		Amino Acid	Alanine and Aspartate Metabolism	234
	37			N-acetylaspartate (NAA)	C01042	HMDB0000812			1.3448									Amino Acid	Alanine and Aspartate Metabolism	100000787
	40			asparagine	C00152	HMDB0000168		-2.1285	1.9917		-2.0756	-1.342	-0.794	-1.0811	-0.6631	0.3053		Amino Acid	Alanine and Aspartate Metabolism	917
	43			hydroxyasparagine**	C20631	HMDB32332												Amino Acid	Alanine and Aspartate Metabolism	100020205
	44		Glutamate Metabolism	glutamate	C00025 C00217	HMDB0000148		-2.1926	1.7584		0.3601	0.1889	0.3083	-0.2695	-0.4839	-0.8428		Amino Acid	Glutamate Metabolism	561
	45			glutamine	C00064	HMDB0000641		-2.8528	1.5896		-1.4224	-1.0644	-0.6106	-0.3255	0.7317	0.3622		Amino Acid	Glutamate Metabolism	563
	46			alpha-ketoglutaramate*	C00940	HMDB0001552												Amino Acid	Glutamate Metabolism	100002397
	47			N-acetylglutamate	C00624	HMDB0001138		-2.0317	1.7182		-1.6294	-0.8433	-1.2789	-1.3048	-0.6541	-1.0962		Amino Acid	Glutamate Metabolism	100000282
	48			N-acetylglutamine	C02716	HMDB0006029			1.7594		-0.745		-0.3675	-0.881	-0.1907	0.1173		Amino Acid	Glutamate Metabolism	100001253
	51			4-hydroxyglutamate	C03079	HMDB0001344			1.5394		2.3298	1.2529	1.2752	2.0799	0.0255	-0.9599		Amino Acid	Glutamate Metabolism	100002544
	54			glutamate, gamma-methyl ester		HMDB0061715			2.2162									Amino Acid	Glutamate Metabolism	100001103
	55			N-acetyl-aspartyl-glutamate (NAAG)	C12270	HMDB0001067		-2.9705	1.4445									Amino Acid	Glutamate Metabolism	100001612
	56			beta-citrylglutamate	C20775			-1.8728	2.0032		-0.9456	-0.4305	0.2083	-0.9352	0.0066	0.2679		Amino Acid	Glutamate Metabolism	100003271
	58			carboxyethyl-GABA		HMDB0002201		-3.3673	1.9023		-0.0852	-1.1797	-1.582	-0.7315	-0.6405	-0.5301		Amino Acid	Glutamate Metabolism	100003260
	60			2-pyrrolidinone		HMDB0002039		-2.2836	3.04		2.6736	0.8388	1.4622	1.6122	-0.4741	0.3243		Amino Acid	Glutamate Metabolism	100001081
	62			S-1-pyrroline-5-carboxylate	C04322	HMDB0001301			1.8801				0.82	1.0237	2.198	2.0607		Amino Acid	Glutamate Metabolism	35
	63			citramalate	C00815	HMDB0000426			1.7668		0.5106	0.3289	-0.1457					Amino Acid	Glutamate Metabolism	100000998
	70		Histidine Metabolism	histidine	C00135	HMDB0000177		-2.0816	2.0007		-2.0055	-1.8769	-0.454	0.3837	-0.593	0.4966		Amino Acid	Histidine Metabolism	355
	71			1-methylhistidine	C01152	HMDB0000001		-1.6106	2.0927		-0.3888	0.1008	0.8322	-0.1471	0.9678	-0.1573		Amino Acid	Histidine Metabolism	100001051
	72			3-methylhistidine	C01152	HMDB0000479		-1.7603	1.7651		-0.36	-0.821	0.2916	0.1487	0.8884	-0.3204		Amino Acid	Histidine Metabolism	100000042
	73			N-acetylhistidine	C02997	HMDB0032055			1.5355		-0.1011	0.4287	-0.1446	0.047	-0.6576	0.2677		Amino Acid	Histidine Metabolism	100001293
	75			N-acetyl-3-methylhistidine*					1.6711						1.1654	0.586		Amino Acid	Histidine Metabolism	100002204
	76			N-acetyl-1-methylhistidine*					1.6014				0.0137					Amino Acid	Histidine Metabolism	100004299
	77			hydantoin-5-propionate	C05565	HMDB0001212			1.6512			0.3896	-0.0449	-0.2516	0.8455	0.0105		Amino Acid	Histidine Metabolism	100002514
	78			trans-urocanate	C00785	HMDB0000301		-1.9876	1.9074		-0.1702	0.525	-1.002	-0.3069	-1.5479	-0.669		Amino Acid	Histidine Metabolism	537
	80			imidazole propionate		HMDB0002271			1.9998									Amino Acid	Histidine Metabolism	100003434
	81			formiminoglutamate	C00439	HMDB0000854												Amino Acid	Histidine Metabolism	100002500
	83			imidazole lactate	C05568	HMDB0002320		-1.5986	2.5969		-0.7079	-0.6575	-0.9065	-0.72	-0.8362	-1.1062		Amino Acid	Histidine Metabolism	100000263
	84			carnosine	C00386	HMDB0000033												Amino Acid	Histidine Metabolism	249
	86			N-acetylcarnosine		HMDB0012881			2.4221		0.1002	-0.0456	0.3462	-0.0162	0.2698	-0.3624		Amino Acid	Histidine Metabolism	100004046
	87			anserine	C01262	HMDB0000194												Amino Acid	Histidine Metabolism	100000044
	91			1-methyl-4-imidazoleacetate	C05828	HMDB0002820		-2.2812	1.7896		-0.0274	0.603	0.0906	0.1454	0.792	-0.1406		Amino Acid	Histidine Metabolism	100001208
	97			4-imidazoleacetate	C02835	HMDB0002024			1.8037		1.1974	1.3699	1.2104	0.8978	1.0732	1.0443		Amino Acid	Histidine Metabolism	100001207
	105		Lysine Metabolism	lysine	C00047 C00739	HMDB0003405		-2.1771	1.9112		-1.2799	-1.6332	-0.849	-0.8413	-0.9044	-0.1654		Amino Acid	Lysine Metabolism	407
	107			N6-acetyllysine	C02727	HMDB0000206		-2.402	1.9704		-0.1097	0.4129	0.8639	-0.2812	1.6258	0.5035		Amino Acid	Lysine Metabolism	100001734
	116			N6,N6,N6-trimethyllysine	C03793	HMDB0001325		-2.0569	2.4472		-1.2041	-0.9639	-0.9192	-1.2536	-0.2704	-1.0656		Amino Acid	Lysine Metabolism	189
	117			hydroxy-N6,N6,N6-trimethyllysine*														Amino Acid	Lysine Metabolism	100021123
	119			5-hydroxylysine	C16741	HMDB0000450		-2.445	1.8569		-0.5181	-0.7695	-0.6033	-0.7138	0.232	-0.7166		Amino Acid	Lysine Metabolism	100000054
	120			5-(galactosylhydroxy)-L-lysine				-2.5329	1.4835									Amino Acid	Lysine Metabolism	100002462
	121			fructosyllysine		HMDB0034879												Amino Acid	Lysine Metabolism	100005373
	123			2-aminoadipate	C00956	HMDB0000510			1.7841		-0.3996	0.2601	0.6369	0.4206	0.681	-0.3488		Amino Acid	Lysine Metabolism	381
	127			glutarylcarnitine (C5-DC)		HMDB0013130		-2.1724	1.7603		-1.1042	-0.0267	0.3826	0.4698	0.3668	-0.6417		Amino Acid	Lysine Metabolism	100001593
	131			pipecolate				-1.7558	3.0512		0.0805	-0.9772	-0.0075	0.3906	1.6168	-0.0342		Amino Acid	Lysine Metabolism	1025
	133			6-oxopiperidine-2-carboxylate		HMDB0061705		-2.136	2.071		-0.3286	0.4839	0.6307	0.3374	0.933	-0.2262		Amino Acid	Lysine Metabolism	100004499
	135			N-acetyl-cadaverine		HMDB0002284			1.8231				0.5567					Amino Acid	Lysine Metabolism	100002249
	138			N,N,N-trimethyl-5-aminovalerate				-2.4938	1.7847		-2.5457	-2.1792	-2.7321	-2.8407	-2.7198	-2.858		Amino Acid	Lysine Metabolism	100015962
	140		Phenylalanine Metabolism	phenylalanine	C00079	HMDB0000159		-2.2994	1.9743		-0.5432	-0.2441	-0.3205	-0.4825	-0.3583	-0.3621		Amino Acid	Phenylalanine Metabolism	460
	141			N-acetylphenylalanine	C03519	HMDB0000512		-2.1336	2.0813		0.5834	0.415	1.3995	0.2334	-0.3302	0.0312		Amino Acid	Phenylalanine Metabolism	100001256
	146			1-carboxyethylphenylalanine														Amino Acid	Phenylalanine Metabolism	100020419
	150			phenylpyruvate	C00166	HMDB0000205		-1.8478	2.3976									Amino Acid	Phenylalanine Metabolism	241
	151			phenyllactate (PLA)	C05607	HMDB0000779 HMDB0000563		-1.9185	2.3802		-2.0265	-1.2755	-1.2848	-1.5593	-2.0916	-1.5058		Amino Acid	Phenylalanine Metabolism	100000774
	155			phenylacetate	C07086	HMDB0000209			1.5833									Amino Acid	Phenylalanine Metabolism	100000011
	156			2-hydroxyphenylacetate	C05852	HMDB0000669			1.8874									Amino Acid	Phenylalanine Metabolism	235
	159			4-hydroxyphenylacetate	C00642	HMDB0000020			1.7586		1.0635	1.1122	1.4232	0.881	0.9623	1.1121		Amino Acid	Phenylalanine Metabolism	144
	162		Tyrosine Metabolism	tyrosine	C00082	HMDB0000158		-1.9313	1.9738		0.5901	-0.1494	-0.2323	0.5797	1.4725	0.8789		Amino Acid	Tyrosine Metabolism	815
	163			N-acetyltyrosine		HMDB0000866			1.8411		0.9002	0.3923	0.7639	0.7176	0.5832	0.8077		Amino Acid	Tyrosine Metabolism	100001104
	175			4-hydroxyphenylpyruvate	C01179	HMDB0000707		-1.926	2.0091									Amino Acid	Tyrosine Metabolism	1141
	181			3-(4-hydroxyphenyl)lactate	C03672	HMDB0000755		-2.0287	2.0544		-0.8729	-0.6256	-1.6626	-0.9826	-0.8482	-1.1499		Amino Acid	Tyrosine Metabolism	240
	190			phenol sulfate	C02180	HMDB0060015		-2.2774	1.9484		-1.2337	-0.6155	-0.3263	-0.5813	-0.3543	-0.207		Amino Acid	Tyrosine Metabolism	100001510
	201			vanillactate		HMDB0000913			1.7434		-2.1027	-0.5679	-0.9275	-1.0353	-1.1246	-1.5175		Amino Acid	Tyrosine Metabolism	100006129
	202			vanillylmandelate (VMA)	C05584	HMDB0000291		-2.3779	1.7915		1.1767	1.207	0.5225	0.3632	0.9175	0.2149		Amino Acid	Tyrosine Metabolism	1111
	204			3-methoxytyrosine		HMDB0001434		-1.989	1.7037		-0.5998	-0.606	-1.1201	-1.3129	-0.6643	-0.5653		Amino Acid	Tyrosine Metabolism	1342
	206			3-methoxytyramine sulfate					1.7488									Amino Acid	Tyrosine Metabolism	100004634
	219			gentisate	C00628	HMDB0000152			1.7383									Amino Acid	Tyrosine Metabolism	100000447
	223			dopamine 4-sulfate	C13691	HMDB0004148			2.2776									Amino Acid	Tyrosine Metabolism	100006360
	224			dopamine 3-O-sulfate	C13690	HMDB0006275		-1.6396	3.1523		0.6594	1.2041	0.2253	0.1129	0.8461	0.4378		Amino Acid	Tyrosine Metabolism	100006361
	225			p-cresol glucuronide*		HMDB0011686			1.609		1.4669	1.7056	1.351	1.2369	1.1084	1.7173		Amino Acid	Tyrosine Metabolism	100006191
	226			tyramine O-sulfate		HMDB0006409			2.2077		0.7076	0.7301	1.057	1.0538	0.9637	1.4926		Amino Acid	Tyrosine Metabolism	100006092
	227			N-formylphenylalanine		HMDB0240317			1.6114									Amino Acid	Tyrosine Metabolism	100006056
	228			vanillic alcohol sulfate		HMDB0041788			1.6935		1.1452	1.7157	1.3693	1.3528	1.7154	1.9037		Amino Acid	Tyrosine Metabolism	100006125
	245			thyroxine	C01829	HMDB0000248		-2.2194	1.7706		0.3433	0.3558	-0.2602	-0.422	-0.6163	-0.597		Amino Acid	Tyrosine Metabolism	1094
	254		Tryptophan Metabolism	tryptophan	C00078	HMDB0000929		-2.483	1.7603		-0.4207	-0.3527	0.2719	-0.0748	-0.8166	-0.3027		Amino Acid	Tryptophan Metabolism	565
	255			N-acetyltryptophan	C03137	HMDB0013713		-2.6548	1.9241		0.8049	1.661	0.6818	1.6487	1.3872	1.7085		Amino Acid	Tryptophan Metabolism	100001254
	261			C-glycosyltryptophan		HMDB0240296		-2.0923	1.7719		-0.8705	-0.1857	-0.7144	-1.0606	-0.9134	-0.6574		Amino Acid	Tryptophan Metabolism	100006379
	264			tryptophan betaine	C09213	HMDB0061115		-2.0089	1.5145		0.0756	0.1193	-0.6599	-0.7293	-1.2948	-1.2091		Amino Acid	Tryptophan Metabolism	100001743
	267			kynurenine	C00328	HMDB0000684		-2.4352	2.1836		-0.591	-0.7789	-0.2742	-0.8576	-1.9309	-1.2529		Amino Acid	Tryptophan Metabolism	100000265
	270			N-acetylkynurenine (2)					1.8339									Amino Acid	Tryptophan Metabolism	100006378
	272			kynurenate	C01717	HMDB0000715		-2.094	2.0942		-1.4385	-0.9356	-0.3673	-0.8991	-1.2255	-1.3083		Amino Acid	Tryptophan Metabolism	98
	274			N-formylanthranilic acid	C05653	HMDB0004089			2.046		0.368	1.2021	0.5048	0.8315	0.6909	0.6845		Amino Acid	Tryptophan Metabolism	100004561
	278			xanthurenate	C02470	HMDB0000881			1.4359									Amino Acid	Tryptophan Metabolism	100000015
	282			picolinate	C10164	HMDB0002243												Amino Acid	Tryptophan Metabolism	1022
	287			serotonin	C00780	HMDB0000259			1.435									Amino Acid	Tryptophan Metabolism	504
	290			5-hydroxyindoleacetate	C05635	HMDB0000763			2.2556									Amino Acid	Tryptophan Metabolism	71
	298			indolelactate	C02043	HMDB0000671		-1.8911	2.0957		-0.9349	-0.222	0.2665	-0.1644	-0.8765	-0.9703		Amino Acid	Tryptophan Metabolism	100000463
	299			indoleacetate	C00954	HMDB0000197		-1.9092	2.0035		1.252	1.1458	1.0095	0.7682	0.549	0.694		Amino Acid	Tryptophan Metabolism	100001034
	305			indolepropionate		HMDB0002302			1.3635		0.386	-0.388	0.7812	0.1051	-0.0516	-0.1159		Amino Acid	Tryptophan Metabolism	100001083
	307			indoleacetylglutamine		HMDB0013240			1.7188		1.3753	1.0962	1.9764	1.8261	1.275	1.7626		Amino Acid	Tryptophan Metabolism	100001731
	316			indole-3-carboxylate	C19837	HMDB0003320			1.6603		1.7533	1.8224	2.3833		0.9125	2.9068		Amino Acid	Tryptophan Metabolism	100002185
	322			3-indoxyl sulfate		HMDB0000682		-2.6316	1.5802		1.3684	1.5882	1.6668	0.8769	1.0895	1.2318		Amino Acid	Tryptophan Metabolism	100000467
	327			6-bromotryptophan				-2.5057	1.7959		-0.5808	-0.0494	-0.0457	-0.1469	0.0822	-0.17		Amino Acid	Tryptophan Metabolism	100020414
	332		Leucine, Isoleucine and Valine Metabolism	leucine	C00123	HMDB0000687		-1.9839	1.8774		-1.0894	-0.824	-0.6411	-0.8507	0.0377	-0.9449		Amino Acid	Leucine, Isoleucine and Valine Metabolism	397
	336			N-acetylleucine	C02710	HMDB0011756			1.8891		-0.1147	0.5175	-0.3401	-1.5413	0.004	-0.1809		Amino Acid	Leucine, Isoleucine and Valine Metabolism	1082
	343			4-methyl-2-oxopentanoate	C00233	HMDB0000695		-2.1809	1.9908		0.602	1.1553	0.5851	0.495	0.7983	0.2114		Amino Acid	Leucine, Isoleucine and Valine Metabolism	100000551
	347			alpha-hydroxyisocaproate	C03264	HMDB0000665 HMDB0000624 HMDB00746		-1.5624	1.7656		-1.5958	-1.152	-1.2715	-1.4226	-1.921	-1.8236		Amino Acid	Leucine, Isoleucine and Valine Metabolism	100000706
	351			isovalerate (i5:0)	C08262	HMDB0000718			1.7318		0.978	0.8957	0.9497	0.6811	0.7852	0.588		Amino Acid	Leucine, Isoleucine and Valine Metabolism	100000708
	353			isovalerylglycine		HMDB00678			1.7484		-0.2695	0.1748	0.351	-0.2448	-0.0455	3.1392		Amino Acid	Leucine, Isoleucine and Valine Metabolism	100001452
	354			isovalerylcarnitine (C5)	C20826	HMDB0000688		-1.9838	1.8771		-0.5001	0.4399	0.5815	0.3839	1.1896	0.2742		Amino Acid	Leucine, Isoleucine and Valine Metabolism	100001393
	361			3-methylcrotonylglycine	C20828	HMDB0000459												Amino Acid	Leucine, Isoleucine and Valine Metabolism	100001149
	363			beta-hydroxyisovalerate		HMDB0000754			1.9362		-0.8358	0.119	-0.4549	-0.438	-0.1146	-0.5791		Amino Acid	Leucine, Isoleucine and Valine Metabolism	1442
	364			beta-hydroxyisovaleroylcarnitine														Amino Acid	Leucine, Isoleucine and Valine Metabolism	100001594
	367			3-methylglutaconate		HMDB0000522		-2.1072	2.0066		1.589	1.4545	2.2092	1.369	1.0225	1.6243		Amino Acid	Leucine, Isoleucine and Valine Metabolism	100002458
	375			3-methylglutarylcarnitine (2)		HMDB0000552			2.0106		0.1147	0.3866	1.012	0.3319	0.9543	0.7718		Amino Acid	Leucine, Isoleucine and Valine Metabolism	100005850
	385			isoleucine	C16424 C00407 C06418	HMDB0000172		-2.1361	1.7897		-0.8579	-0.4433	-0.3982	-0.6277	0.4408	-0.7007		Amino Acid	Leucine, Isoleucine and Valine Metabolism	376
	386			allo-isoleucine		HMDB0000557												Amino Acid	Leucine, Isoleucine and Valine Metabolism	100005840
	394			3-methyl-2-oxovalerate	C00671 C06008 C03465	HMDB0000491		-2.1425	1.9472		0.0579	0.8857	0.136	0.1902	0.8236	-0.151		Amino Acid	Leucine, Isoleucine and Valine Metabolism	100000036
	395			2-hydroxy-3-methylvalerate		HMDB0000317		-2.073	2.1493		-1.876	-1.0016	-0.8534	-1.3996	-1.5808	-1.9029		Amino Acid	Leucine, Isoleucine and Valine Metabolism	100001541
	397			2-methylbutyrylcarnitine (C5)		HMDB0000378		-3.0372	1.862		-1.0061	0.5164	0.2525	0.2005	0.2368	0.3296		Amino Acid	Leucine, Isoleucine and Valine Metabolism	100001509
	399			2-methylbutyrylglycine		HMDB0000339			1.6169									Amino Acid	Leucine, Isoleucine and Valine Metabolism	100001155
	400			tiglylcarnitine (C5:1-DC)		HMDB0002366			1.5051		-0.015	0.6226	0.8668	0.5645	0.5561	0.1213		Amino Acid	Leucine, Isoleucine and Valine Metabolism	100001597
	405			3-hydroxy-2-ethylpropionate		HMDB0000396		-2.3049	2.146		-0.0995	1.3876	0.6052	0.6109	0.7875	0.8029		Amino Acid	Leucine, Isoleucine and Valine Metabolism	100001170
	407			ethylmalonate		HMDB0000622		-1.7774	2.5883		1.0418	2.5507	1.9863	1.3102	1.7747	1.2044		Amino Acid	Leucine, Isoleucine and Valine Metabolism	2054
	410			methylsuccinate		HMDB0001844			2.2975		-0.883	0.638	2.1007	-0.935	0.778	-0.8655		Amino Acid	Leucine, Isoleucine and Valine Metabolism	2051
	416			valine	C00183	HMDB0000883		-1.8973	2.0387		-0.6479	-0.062	0.0419	0.0254	0.3775	-0.4247		Amino Acid	Leucine, Isoleucine and Valine Metabolism	566
	417			N-acetylvaline		HMDB0011757		-2.1267	2.0062		0.1489	-0.0758	-0.2426	-0.5794	-0.1186	0.1749		Amino Acid	Leucine, Isoleucine and Valine Metabolism	1084
	420			1-carboxyethylvaline														Amino Acid	Leucine, Isoleucine and Valine Metabolism	100020423
	423			3-methyl-2-oxobutyrate	C00141	HMDB0000019		-2.0779	1.9369		0.5893	1.5458	0.5796	0.8298	1.0887	0.5277		Amino Acid	Leucine, Isoleucine and Valine Metabolism	100000936
	424			alpha-hydroxyisovalerate		HMDB0000407		-1.9956	2.0604		-1.9223	-1.4035	-1.7486	-1.8778	-2.0961	-2.4443		Amino Acid	Leucine, Isoleucine and Valine Metabolism	100001300
	426			isobutyrylcarnitine (C4)		HMDB0000736		-2.0152	1.7512		0.4651	1.574	1.5077	0.7764	0.4935	1.4408		Amino Acid	Leucine, Isoleucine and Valine Metabolism	100001055
	427			isobutyrylglycine		HMDB0000730			1.5458									Amino Acid	Leucine, Isoleucine and Valine Metabolism	100001590
	428			3-hydroxyisobutyrate	C01188 C06001	HMDB0000023 HMDB0000336			1.9105		0.0583	1.9844	0.7484	0.9377	1.2099	0.5796		Amino Acid	Leucine, Isoleucine and Valine Metabolism	111
	429			2,3-dihydroxy-2-methylbutyrate		HMDB0029576			1.9304		0.1758	0.0611	-0.1632	-0.1287	0.5413	0.5308		Amino Acid	Leucine, Isoleucine and Valine Metabolism	100010869
	434		Methionine, Cysteine, SAM and Taurine Metabolism	methionine	C00073	HMDB0000696		-2.0229	1.8572		-0.7371	-0.7588	-0.3317	-0.3132	0.4109	0.1956		Amino Acid	Methionine, Cysteine, SAM and Taurine Metabolism	415
	435			N-acetylmethionine	C02712	HMDB0011745		-1.9085	2.8085		-1.0859	-1.112	-1.5551	-1.5542	-1.2935	-1.1213		Amino Acid	Methionine, Cysteine, SAM and Taurine Metabolism	1083
	437			N-formylmethionine	C03145	HMDB0001015		-2.3667	1.9006		-1.4271	-0.9124	-1.2985	-1.4759	-0.438	-0.5316		Amino Acid	Methionine, Cysteine, SAM and Taurine Metabolism	194
	438			S-methylmethionine	C05319	HMDB0038670			1.7088									Amino Acid	Methionine, Cysteine, SAM and Taurine Metabolism	100002183
	439			methionine sulfone		HMDB0062174		-2.6898	1.8978		-0.3387	0.1389	0.0675	-0.2541	0.5886	0.2791		Amino Acid	Methionine, Cysteine, SAM and Taurine Metabolism	100004635
	440			methionine sulfoxide	C02989	HMDB0002005		-1.7642	2.0856		1.3407	2.0793	1.8731	1.6434	1.2198	0.0413		Amino Acid	Methionine, Cysteine, SAM and Taurine Metabolism	100000039
	446			S-adenosylhomocysteine (SAH)	C00021	HMDB00939			1.5307							-1.2721		Amino Acid	Methionine, Cysteine, SAM and Taurine Metabolism	197
	453			cystathionine	C02291	HMDB0000099			1.9392		0.787	0.6188	1.2688	0.8207	2.5984	1.4859		Amino Acid	Methionine, Cysteine, SAM and Taurine Metabolism	310
	454			alpha-ketobutyrate	C00109	HMDB0000005			1.5055									Amino Acid	Methionine, Cysteine, SAM and Taurine Metabolism	796
	455			cysteine	C00097	HMDB0000574		-2.0073	2.7155		-0.462	-0.588	-0.7372	-0.38	1.2307	0.4323		Amino Acid	Methionine, Cysteine, SAM and Taurine Metabolism	800
	457			S-methylcysteine		HMDB0002108		-2.0255	2.9883		0.2255	0.1155	-0.4016	-0.0083	0.5065	0.4889		Amino Acid	Methionine, Cysteine, SAM and Taurine Metabolism	100002749
	458			S-methylcysteine sulfoxide		HMDB0029432		-1.7358	2.7488		-0.5211	-0.0375	-0.6179	-0.5896	-0.0933	-0.2706		Amino Acid	Methionine, Cysteine, SAM and Taurine Metabolism	100002927
	461			cysteine s-sulfate	C05824	HMDB0000731		-2.0976	2.1694		-1.3931	-1.2071	-1.1445	-1.3771	-0.6643	-0.6455		Amino Acid	Methionine, Cysteine, SAM and Taurine Metabolism	100000808
	462			cystine	C00491	HMDB0000192		-2.3702	1.7638		-1.1504	-0.5679	-0.8882	-0.7231	-1.3727	0.7349		Amino Acid	Methionine, Cysteine, SAM and Taurine Metabolism	279
	466			lanthionine					1.8072									Amino Acid	Methionine, Cysteine, SAM and Taurine Metabolism	100003892
	468			cysteine sulfinic acid	C00606	HMDB0000996			1.797									Amino Acid	Methionine, Cysteine, SAM and Taurine Metabolism	100002113
	470			hypotaurine	C00519	HMDB0000965		-2.268	1.7741									Amino Acid	Methionine, Cysteine, SAM and Taurine Metabolism	358
	471			taurine	C00245	HMDB0000251		-1.8085	1.6676		-0.7392	-0.0743	0.4226	-1.144	-0.65	1.1652		Amino Acid	Methionine, Cysteine, SAM and Taurine Metabolism	512
	473			N-acetyltaurine		HMDB0240253		-2.1117	1.9844									Amino Acid	Methionine, Cysteine, SAM and Taurine Metabolism	100005466
	483		Urea cycle; Arginine and Proline Metabolism	arginine	C00062	HMDB0000517		-2.5523	1.4492		0.5648	0.2684	0.6793	0.5715	0.8758	1.1088		Amino Acid	Urea cycle; Arginine and Proline Metabolism	231
	484			argininosuccinate	C03406	HMDB0000052												Amino Acid	Urea cycle; Arginine and Proline Metabolism	232
	485			urea	C00086	HMDB0000294		-2.0642	1.6351		-0.7902	0.4369	0.5475	-0.0163	0.334	-0.1658		Amino Acid	Urea cycle; Arginine and Proline Metabolism	533
	487			ornithine	C00077	HMDB0000214		-1.9883	1.8145		-3.7693	-2.8323	-2.696	-2.8504	-1.6722	-2.2575		Amino Acid	Urea cycle; Arginine and Proline Metabolism	444
	491			2-oxoarginine*	C03771	HMDB0004225		-1.9368	1.881		-0.5319	0.3145	0.8193	0.3518	0.2972	-0.0046		Amino Acid	Urea cycle; Arginine and Proline Metabolism	100002784
	492			citrulline	C00327	HMDB0000904		-1.6621	1.8464		0.503	0.1411	0.7765	0.7446	0.6491	-0.0384		Amino Acid	Urea cycle; Arginine and Proline Metabolism	391
	493			homoarginine	C01924	HMDB0000670		-2.4469	2.3157		-0.8768	-1.1901	0.2436	0.7499	1.4145	1.1288		Amino Acid	Urea cycle; Arginine and Proline Metabolism	100000961
	494			homocitrulline	C02427	HMDB0000679		-2.3251	2.5833		2.6955	3.4258	3.2279	3.138	3.1604	2.4116		Amino Acid	Urea cycle; Arginine and Proline Metabolism	100000963
	495			proline	C00148 C000763	HMDB0000162 HMDB0003411		-1.9807	1.9051		0.2755	0.4557	0.6964	0.3752	0.5106	0.6301		Amino Acid	Urea cycle; Arginine and Proline Metabolism	480
	498			dimethylarginine (SDMA + ADMA)	C21189 C03626	HMDB0003334 HMDB0001539		-2.6819	1.843		-1.2518	-0.9486	-1.1574	-1.4393	-0.9598	-0.6094		Amino Acid	Urea cycle; Arginine and Proline Metabolism	100001810
	499			N-acetylarginine	C02562	HMDB0004620		-2.0684	1.9076		-2.2545	-1.6271	-0.844	-1.0587	-1.1132	-0.645		Amino Acid	Urea cycle; Arginine and Proline Metabolism	100001266
	504			N-acetylcitrulline	C15532 C02851	HMDB0000856			1.6232				-0.0804		-0.5809			Amino Acid	Urea cycle; Arginine and Proline Metabolism	100001577
	505			N-acetylproline		HMDB0094701			1.9889		0.1011	0.4744	0.3511	-0.4005	-0.1158			Amino Acid	Urea cycle; Arginine and Proline Metabolism	100001334
	508			N-delta-acetylornithine	C00437	HMDB0003357		-2.0096	1.9415		-0.5497	0.0114	0.3192	0.1809	0.9259	0.6456		Amino Acid	Urea cycle; Arginine and Proline Metabolism	100004523
	509			N-alpha-acetylornithine	C00437	HMDB0003357			1.8375									Amino Acid	Urea cycle; Arginine and Proline Metabolism	100000285
	510			N2,N5-diacetylornithine					1.8394		-0.7092	-0.5922	-0.695	-2.1243		0.7475		Amino Acid	Urea cycle; Arginine and Proline Metabolism	100004575
	513			trans-4-hydroxyproline	C01157	HMDB0000725		-2.2584	2.016		-2.1839	-1.6803	-1.6646	-2.2165	-1.3083	-1.7276		Amino Acid	Urea cycle; Arginine and Proline Metabolism	1001
	515			pro-hydroxy-pro		HMDB0006695		-3.1446	1.3747		-1.5319	-1.1342	-0.8371	-1.0916	-0.6638	-0.8768		Amino Acid	Urea cycle; Arginine and Proline Metabolism	100001167
	518			N-methylproline		HMDB0094696		-1.5419	2.4407		-1.0635	-1.1449	-0.8386	-0.9733	-1.3191	-1.4586		Amino Acid	Urea cycle; Arginine and Proline Metabolism	100001956
	519			N,N,N-trimethyl-alanylproline betaine (TMAP)		HMDB0240365												Amino Acid	Urea cycle; Arginine and Proline Metabolism	100020217
	522			argininate*		HMDB0003148		-1.8742	2.0585		-0.7521	-0.6422	0.4676	-0.0606	-0.3701	-0.6747		Amino Acid	Urea cycle; Arginine and Proline Metabolism	100002769
	527		Creatine Metabolism	guanidinoacetate	C00581	HMDB0000128		-3.1589	1.861		-1.2321	-1.6548	0.2081	-1.2362	-2.1036			Amino Acid	Creatine Metabolism	344
	528			creatine	C00300	HMDB0000064		-3.4408	1.6924		0.0661	1.2624	0.4503	0.1025	0.424	0.8703		Amino Acid	Creatine Metabolism	1221
	529			creatinine	C00791	HMDB0000562		-1.2868	2.6188		-0.2975	-0.2093	-0.3588	-0.4728	0.1622	-0.3936		Amino Acid	Creatine Metabolism	275
	537		Polyamine Metabolism	putrescine	C00134	HMDB0001414		-2.3115	2.2685									Amino Acid	Polyamine Metabolism	49
	538			N-acetylputrescine	C02714	HMDB0002064		-2.0185	1.9142		3.575	0.0524	0.3923	0.5879	1.141	1.1065		Amino Acid	Polyamine Metabolism	192
	544			N-acetyl-isoputreanine														Amino Acid	Polyamine Metabolism	100020487
	545			spermidine	C00315	HMDB0001257		-1.7407	1.9106		-0.1969	-0.4047	0.1652	-1.5986	-1.3111	0.4981		Amino Acid	Polyamine Metabolism	50
	549			diacetylspermidine*	C03413	HMDB0002172												Amino Acid	Polyamine Metabolism	100020242
	550			(N(1) + N(8))-acetylspermidine	C00612 C01029	HMDB0001276 HMDB0002189												Amino Acid	Polyamine Metabolism	100016038
	551			acisoga		HMDB0061384			1.734		2.5587	0.4213	-0.0259	-0.3079	0.0616	0.4742		Amino Acid	Polyamine Metabolism	100004541
	556			5-methylthioadenosine (MTA)	C00170	HMDB0001173			1.3041									Amino Acid	Polyamine Metabolism	212
	560			4-acetamidobutanoate	C02946	HMDB0003681		-2.1069	1.6571									Amino Acid	Polyamine Metabolism	1113
	562		Guanidino and Acetamido Metabolism	1-methylguanidine	C02294	HMDB0001522			1.8396									Amino Acid	Guanidino and Acetamido Metabolism	100000715
	563			4-guanidinobutanoate	C01035	HMDB0003464		-1.9483	2.0081		-1.5199	-1.7952	0.7931	0.1841	-1.9032			Amino Acid	Guanidino and Acetamido Metabolism	100000096
	567		Glutathione Metabolism	glutathione, oxidized (GSSG)	D00031 C00127	HMDB0003337												Amino Acid	Glutathione Metabolism	448
	573			cysteine-glutathione disulfide	R00900	HMDB0000656												Amino Acid	Glutathione Metabolism	100001437
	576			cysteinylglycine	C01419	HMDB0000078		-1.7954	3.5164		-2.048	-2.5313	-2.3823	-2.0782	-1.4082	-1.1936		Amino Acid	Glutathione Metabolism	278
	578			cys-gly, oxidized														Amino Acid	Glutathione Metabolism	1224
	579			5-oxoproline	C01879 C02237	HMDB0000267		-1.7865	2.3591		-1.1613	-1.3199	-0.9933	-1.4297	-1.7154	-1.8996		Amino Acid	Glutathione Metabolism	1021
	580			2-aminobutyrate	C02356	HMDB0000452		-2.178	2.0499		-0.4019	0.5223	0.3131	0.4794	0.693	-0.2201		Amino Acid	Glutathione Metabolism	1128
	582			2-hydroxybutyrate/2-hydroxyisobutyrate	C21297 C05984	HMDB0000729 HMDB00008		-2.1306	2.0022		-0.4845	1.2665	0.324	0.529	0.9565	-0.113		Amino Acid	Glutathione Metabolism	100008928
	632	Peptide	Gamma-glutamyl Amino Acid	gamma-glutamylalanine	C03738	HMDB0029142			1.4646									Peptide	Gamma-glutamyl Amino Acid	100001843
	634			gamma-glutamylglutamate	C05282	HMDB0011737			1.8123		1.8271	1.7803	1.6804	1.3543	0.1326	-0.2473		Peptide	Gamma-glutamyl Amino Acid	331
	635			gamma-glutamylglutamine	C05283	HMDB0011738		-2.3858	1.6422		1.2353	1.5478	1.5165	1.5736	0.5759	0.2873		Peptide	Gamma-glutamyl Amino Acid	1140
	636			gamma-glutamylglycine		HMDB0011667		-1.4923	2.0021		2.1418	2.1788	2.2557	1.9084	-0.1025	-0.6172		Peptide	Gamma-glutamyl Amino Acid	100001294
	637			gamma-glutamylhistidine		HMDB0029151		-1.9836	2.1087		1.1184	2.0678	2.5023	1.3653	0.2772	-1.6819		Peptide	Gamma-glutamyl Amino Acid	1235
	638			gamma-glutamylisoleucine*		HMDB0011170		-1.5472	2.2124		1.8713	2.0515	1.7386	1.4731	0.283	-0.8766		Peptide	Gamma-glutamyl Amino Acid	100001485
	639			gamma-glutamylleucine		HMDB0011171		-1.619	2.1573		1.5509	1.65	1.61	1.2485	0.1814	-1.0571		Peptide	Gamma-glutamyl Amino Acid	1268
	640			gamma-glutamyl-alpha-lysine				-1.9394	2.0727		1.2035	1.2272	1.4062	1.1935	-0.1691	-0.5906		Peptide	Gamma-glutamyl Amino Acid	100010901
	641			gamma-glutamyl-epsilon-lysine		HMDB0003869			1.7111		0.7718	-0.0299	1.4693	0.4488	-0.1199	-1.3488		Peptide	Gamma-glutamyl Amino Acid	100001262
	642			gamma-glutamylmethionine		HMDB0029155		-2.6589	1.9176		1.5133	1.7034	1.7631	1.9052	1.0567	0.2894		Peptide	Gamma-glutamyl Amino Acid	100001313
	643			gamma-glutamylphenylalanine		HMDB0000594		-2.005	2.0894		1.4888	1.9047	1.3853	1.0404	0.3139	-0.2931		Peptide	Gamma-glutamyl Amino Acid	100000491
	644			gamma-glutamylthreonine		HMDB0029159		-2.1092	1.9849		1.8716	2.0177	2.2815	1.6367	0.6944	-0.1158		Peptide	Gamma-glutamyl Amino Acid	100001314
	645			gamma-glutamyltryptophan		HMDB0029160			1.7436		-0.8238	-0.7409	-0.2791	-0.4029	-0.7714	-0.6394		Peptide	Gamma-glutamyl Amino Acid	100001295
	646			gamma-glutamyltyrosine		HMDB0011741		-2.1371	1.9893		2.0384	1.4802	1.7009	1.5973	1.8441	0.9774		Peptide	Gamma-glutamyl Amino Acid	1102
	647			gamma-glutamylvaline		HMDB0011172		-1.5924	2.0745		2.1677	2.4057	2.2902	2.0435	0.4741	-0.4595		Peptide	Gamma-glutamyl Amino Acid	100001126
	650			gamma-glutamyl-2-aminobutyrate					1.7234									Peptide	Gamma-glutamyl Amino Acid	100001502
	674		Dipeptide	alpha-glutamylalanine		HMDB03764			2.7253									Peptide	Dipeptide	100003631
	733			cyclo(ala-pro)					2.1883		0.251	0.056	1.418	0.9029	1.003	-0.5471		Peptide	Dipeptide	100004646
	745			cyclo(gly-pro)					1.8015									Peptide	Dipeptide	100001946
	762			cyclo(leu-pro)		HMDB0034276			2.1128		-0.3489	-0.0401	0.0102	-0.4338	0.3552			Peptide	Dipeptide	100001925
	766			cyclo(met-pro)					2.2418									Peptide	Dipeptide	100006759
	769			cyclo(phe-pro)	C11847													Peptide	Dipeptide	100001927
	783			cyclo(pro-val)				-1.5433	2.3818		-0.0983	-0.0437	0.4603	0.2364	-0.2116	-0.6775		Peptide	Dipeptide	100006065
	822			glycylphenylalanine		HMDB0028848												Peptide	Dipeptide	100001268
	834			histidylalanine		HMDB0028878			1.8153									Peptide	Dipeptide	100003542
	847			isoleucylalanine		HMDB0028900		-3.1312	2.6081		-0.681	-1.0926	-0.4539	-0.3055	0.2376	-0.4649		Peptide	Dipeptide	100003163
	853			isoleucylglycine		HMDB0028907		-3.7628	1.653		-0.8743	-1.0621	-0.6692	-0.6936	-0.1572	-0.6873		Peptide	Dipeptide	100003169
	872			leucylglycine		HMDB0028929			2.693		-0.0647	-0.9516	0.2512	0.0368	0.1273	0.3748		Peptide	Dipeptide	100003185
	875			leucylleucine	C11332	HMDB0028933			1.648				0.0971	-0.1578		-0.2521		Peptide	Dipeptide	100001710
	902			methionylalanine		HMDB0028966			2.1413		-0.3643	-0.285	-0.434		-0.8832			Peptide	Dipeptide	100003651
	931			phenylalanylphenylalanine					2.7597		-0.1891	-0.1468	-0.2257	-0.2195	-0.356	-0.589		Peptide	Dipeptide	100002293
	947			prolylglycine		HMDB0011178			1.865		0.7012	1.042	0.6541	0.4217	0.9665	0.5658		Peptide	Dipeptide	100003674
	953			prolylproline		HMDB0011180												Peptide	Dipeptide	100003678
	954			prolylserine		HMDB0029026			1.7003		1.4786	1.5465	1.7361	1.6784	1.6173	1.092		Peptide	Dipeptide	100003679
	973			seryltyrosine		HMDB0029051			1.8292									Peptide	Dipeptide	100003525
	986			threonylphenylalanine		HMDB0029068			1.7928									Peptide	Dipeptide	100001125
	995			tryptophylasparagine		HMDB0029078			1.966									Peptide	Dipeptide	100003620
	1028			valylalanine		HMDB0029120		-2.3346	2.7162		-0.0328	-0.1377	0.3115	0.4365	0.5563	0.2678		Peptide	Dipeptide	100003636
	1033			valylglutamine		HMDB0029125			1.867		0.3146	0.0601	0.9884	0.7876	1.3717	0.5046		Peptide	Dipeptide	100003640
	1034			valylglycine		HMDB0029127			1.5275		-0.7306	-0.8176	-0.2972	-0.2573	-0.1307	-0.4404		Peptide	Dipeptide	100003641
	1037			valylleucine		HMDB0029131			2.383									Peptide	Dipeptide	100003210
	1048			isoleucylleucine/leucylisoleucine					2.1354		0.5286	0.3432	0.5851	0.307	0.7256	0.6114		Peptide	Dipeptide	100008939
	1049			leucylphenylalanine/isoleucylphenylalanine		HMDB0013243 HMDB0028914			3.1599			-0.6357	-0.7983		-0.4449	-0.0348		Peptide	Dipeptide	100008951
	1065		Polypeptide	bradykinin	C00306	HMDB0004246												Peptide	Polypeptide	100000967
	1067			bradykinin, hydroxy-pro(3)		HMDB0011728												Peptide	Polypeptide	100001237
	1068			bradykinin, des-arg(9)	C00306	HMDB04246												Peptide	Polypeptide	100001292
	1072			HWESASXX*					1.7878			1.4743						Peptide	Polypeptide	100001327
	1074			HWESASLLR					1.794									Peptide	Polypeptide	100001281
	1157		Fibrinogen Cleavage Peptide	Fibrinopeptide A*					1.8721									Peptide	Fibrinogen Cleavage Peptide	100001322
	1165			Fibrinopeptide A, des-ala(1)*					1.8723									Peptide	Fibrinogen Cleavage Peptide	100001323
	1166			Fibrinopeptide A, phosphono-ser(3)*					1.8126									Peptide	Fibrinogen Cleavage Peptide	100001324
	1184		Acetylated Peptides	phenylacetylcarnitine					1.5713		1.5521	2.2625	1.9405	1.5208	1.5133	2.3717		Peptide	Acetylated Peptides	100006108
	1187			phenylacetylglutamine	C04148	HMDB0006344		-2.0091	1.5781		1.2895	1.9142	1.6108	1.3832	1.102	2.1005		Peptide	Acetylated Peptides	100001417
	1190			phenylacetylglycine	C05598	HMDB0000821												Peptide	Acetylated Peptides	100001275
	1205		Modified Peptides	pyroglutamylglutamine		HMDB39229			1.779		0.1137	0.0996	0.5535	0.1624	0.2904	-0.3493		Peptide	Modified Peptides	100000966
	1218			pyroglutamylvaline				-2.3083	2.586		-0.5735	-0.2991	1.226	-0.6972	-1.361	-0.665		Peptide	Modified Peptides	100001132
	1220	Carbohydrate	Glycolysis, Gluconeogenesis, and Pyruvate Metabolism	1,5-anhydroglucitol (1,5-AG)	C07326	HMDB0002712		-1.9867	1.6173		0.9333	0.8144	1.0153	1.0711	0.5525	0.4882		Carbohydrate	Glycolysis, Gluconeogenesis, and Pyruvate Metabolism	100000580
	1223			glucose	C00031	HMDB0000122		-4.0784	0.8198		0.6451	0.6258	0.6003	0.4675	0.5579	0.5832		Carbohydrate	Glycolysis, Gluconeogenesis, and Pyruvate Metabolism	572
	1237			3-phosphoglycerate	C00597	HMDB0000807			1.4435									Carbohydrate	Glycolysis, Gluconeogenesis, and Pyruvate Metabolism	132
	1239			pyruvate	C00022	HMDB0000243		-1.9957	1.8109									Carbohydrate	Glycolysis, Gluconeogenesis, and Pyruvate Metabolism	823
	1240			lactate	C00186	HMDB0000190		-2.0916	1.3631		-1.5704	-1.1285	-2.2771	-2.3478	-2.7898	-2.1934		Carbohydrate	Glycolysis, Gluconeogenesis, and Pyruvate Metabolism	482
	1243			glycerate	C00258	HMDB0006372 HMDB0000139		-2.269	1.6893		0.8854	0.9327	1.3452	1.3421	1.3177	0.1444		Carbohydrate	Glycolysis, Gluconeogenesis, and Pyruvate Metabolism	1052
	1261		Pentose Metabolism	ribose	C00121	HMDB0000283												Carbohydrate	Pentose Metabolism	914
	1262			ribitol	C00532 C01904 C00474 C00379	HMDB0002917 HMDB0000508 HMDB0001851 HMDB0000568			1.7572		0.2838	0.0463	0.3301	0.1942	0.1939	0.0148		Carbohydrate	Pentose Metabolism	100000406
	1263			ribonate	C01685	HMDB0000867		-2.5298	2.0976		0.3062	0.2016	0.1796	0.4223	0.0148	-0.1266		Carbohydrate	Pentose Metabolism	100001007
	1267			xylose	C00181	HMDB0000098			2.1505		1.1641	1.3053	0.9523	0.7045	0.2143	1.3519		Carbohydrate	Pentose Metabolism	826
	1277			arabitol/xylitol	C00542 C01904 C00379	HMDB0002917 HMDB0001851 HMDB0000568		-2.5614	1.8117		0.6354	0.3386	0.9461	0.3935	-0.1005	0.3161		Carbohydrate	Pentose Metabolism	100006430
	1283			arabonate/xylonate	C00502 C05411	HMDB0000539		-2.0034	2.3247		0.2234	0.3362	-0.1253	0.833	0.4077	-0.5075		Carbohydrate	Pentose Metabolism	100006115
	1296		Glycogen Metabolism	maltotriose	C01835	HMDB0001262												Carbohydrate	Glycogen Metabolism	100000276
	1299			maltose	C00208	HMDB0000163												Carbohydrate	Glycogen Metabolism	913
	1325		Disaccharides and Oligosaccharides	sucrose	C00089	HMDB0000258			2.7169		-0.4218	-0.3389	0.441	0.0049	-0.0716	0.2706		Carbohydrate	Disaccharides and Oligosaccharides	935
	1346		Fructose, Mannose and Galactose Metabolism	fructose	C00095	HMDB0000660		-1.8992	2.1559		-1.2297	-0.3107	-0.1254	1.3335	-0.8087	0.104		Carbohydrate	Fructose, Mannose and Galactose Metabolism	878
	1351			mannitol/sorbitol	C00392 C00794	HMDB0000247 HMDB0000765		-1.4278	2.9034		0.2795	0.0845	1.7275	0.8014	0.2037	0.3416		Carbohydrate	Fructose, Mannose and Galactose Metabolism	100001740
	1352			mannose	C00159 C02209 C00936	HMDB0000169			1.4656		1.2942	0.9149	1.1153	0.7226	1.0806	0.9862		Carbohydrate	Fructose, Mannose and Galactose Metabolism	803
	1372			galactonate	C15930 C00880	HMDB0000565			1.4273		-1.2824			-1.1683		-1.3861		Carbohydrate	Fructose, Mannose and Galactose Metabolism	100001026
	1406		Aminosugar Metabolism	glucuronate	C16245	HMDB0000127		-2.574	2.273		0.522	1.1719	1.1955	0.5532	1.1313	0.425		Carbohydrate	Aminosugar Metabolism	100000257
	1418			N-acetylneuraminate	C00270	HMDB0000230		-2.1178	1.8474		-0.3013	0.0181	-0.2462	-1.2901	-1.1644	0.2869		Carbohydrate	Aminosugar Metabolism	1162
	1430			N-acetylglucosaminylasparagine	C04540	HMDB0000489			1.5654		1.1387	0.9991	1.0351	1.2274	1.3746	1.6331		Carbohydrate	Aminosugar Metabolism	1215
	1431			erythronate*		HMDB0000613		-1.8519	1.9372		1.5999	2.0724	1.676	1.3795	0.2986	-0.121		Carbohydrate	Aminosugar Metabolism	100001320
	1433			N-acetylglucosamine/N-acetylgalactosamine	C01074	HMDB0000212 HMDB0000215			1.3472		0.1776	0.1478	0.3096	-0.2845	-0.1864	-0.1991		Carbohydrate	Aminosugar Metabolism	100006435
	1439	Energy	TCA Cycle	citrate	C00158	HMDB0000094		-2.7137	1.6848		-0.9782	-0.5543	-1.0085	-0.3207	-0.8657	-0.3113		Energy	TCA Cycle	1124
	1441			aconitate [cis or trans]	C02341 C004174	HMDB0000958 HMDB000072			1.7463		-3.5232	-1.1241	-1.6037	-2.5071	-2.2183	-2.4296		Energy	TCA Cycle	100001359
	1445			alpha-ketoglutarate	C00026	HMDB0000208		-2.4277	2.6475		-0.3068	0.0523	-0.1597	-0.0116	0.4484	0.2998		Energy	TCA Cycle	93
	1447			succinylcarnitine (C4-DC)		HMDB0061717		-2.0376	2.4157		-0.7169	-1.3853	0.2492	-0.0135	-1.5055	0.3144		Energy	TCA Cycle	100001948
	1448			succinate	C00042	HMDB0000254		-2.1607	2.4502		-1.4321	-1.2683	-1.376	-1.7521	-2.179	-1.6156		Energy	TCA Cycle	252
	1449			fumarate	C00122	HMDB0000134		-6.4799	2.2952		-1.0023	-0.9513	-1.2864	-1.2259	-0.633	-1.1556		Energy	TCA Cycle	330
	1451			malate	C00497 C00149 C00711	HMDB0000744 HMDB0031518 HMDB0000156		-1.7219	1.9258		-2.1726	-1.4831	-1.5137	-1.692	-1.0675	-1.6638		Energy	TCA Cycle	409
	1458			2-methylcitrate	C02225	HMDB0000379												Energy	TCA Cycle	90
	1468		Oxidative Phosphorylation	phosphate	C00009	HMDB0001429		-2.3406	4.0828		-0.4213	-0.8826	-1.1456	-1.297	-0.491	-1.1557		Energy	Oxidative Phosphorylation	461
	1471	Lipid	Fatty Acid Synthesis	malonylcarnitine		HMDB0002095			1.5438									Lipid	Fatty Acid Synthesis	100001526
	1472			malonate	C00383	HMDB0000691			1.7126		-1.1094	0.3006	0.3881	0.2247	-0.107	-0.6265		Lipid	Fatty Acid Synthesis	818
	1489		Medium Chain Fatty Acid	caproate (6:0)	C01585	HMDB0000535			1.8913		-0.7166	0.4096	-0.8015	-0.7634	-0.7377	-1.1489		Lipid	Medium Chain Fatty Acid	926
	1491			caprylate (8:0)	C06423	HMDB0000482			1.8303		1.4087	1.8776	1.2956	1.3971	3.2809	2.2974		Lipid	Medium Chain Fatty Acid	932
	1494			caprate (10:0)	C01571	HMDB0000511		-1.642	1.7949		1.5613	1.9982	0.8848	1.1048	2.5957	1.6932		Lipid	Medium Chain Fatty Acid	888
	1500			10-undecenoate (11:1n1)	C13910	HMDB0033724		-2.0374	1.6249		-0.8817	-0.1457	-0.9912	-1.5671	-2.3149	-1.5387		Lipid	Medium Chain Fatty Acid	100001197
	1502			laurate (12:0)	C02679	HMDB0000638		-1.5615	1.8343		-0.644	-0.0604	-1.3423	-1.5604	0.0066	-1.1121		Lipid	Medium Chain Fatty Acid	181
	1504			5-dodecenoate (12:1n7)		HMDB0000529		-2.1289	1.9528		-0.1816	0.7423	-2.8396	-2.4149	-1.5565	-2.9434		Lipid	Medium Chain Fatty Acid	100001232
	1507		Long Chain Saturated Fatty Acid	myristate (14:0)	C06424	HMDB0000806		-1.7337	1.7493		-0.8814	0.1638	-1.4044	-1.585	-1.7559	-2.0562		Lipid	Long Chain Saturated Fatty Acid	519
	1510			palmitate (16:0)	C00249	HMDB0000220		-2.0568	1.6058		-1.1414	0.0806	-1.1953	-1.351	-1.4468	-1.939		Lipid	Long Chain Saturated Fatty Acid	424
	1512			margarate (17:0)		HMDB0002259		-1.715	2.2014		-1.2669	0.0012	-1.1444	-1.4898	-1.6442	-1.8933		Lipid	Long Chain Saturated Fatty Acid	891
	1514			stearate (18:0)	C01530	HMDB0000827		-1.7843	1.9167		-1.0232	0.0628	-0.4404	-0.9099	-0.9278	-1.3969		Lipid	Long Chain Saturated Fatty Acid	439
	1516			nonadecanoate (19:0)	C16535	HMDB0000772		-1.6231	2.2224		-1.1834	-0.224	-1.1496	-1.4954	-1.4247	-1.975		Lipid	Long Chain Saturated Fatty Acid	892
	1517			arachidate (20:0)	C06425	HMDB0002212		-1.6018	2.2782		-1.2533	0.3272	-0.651	-1.1304	-0.9206	-1.6577		Lipid	Long Chain Saturated Fatty Acid	893
	1519			behenate (22:0)*	C08281	HMDB0000944		-1.704	2.7368		-0.3356	1.9307	-0.0466	1.0162	0.2923	0.4913		Lipid	Long Chain Saturated Fatty Acid	314
	1526		Long Chain Monounsaturated Fatty Acid	myristoleate (14:1n5)	C08322	HMDB0002000		-1.9781	1.6802		-0.2273	0.7007	-1.8301	-1.8825	-2.3783	-2.1326		Lipid	Long Chain Monounsaturated Fatty Acid	100001198
	1529			palmitoleate (16:1n7)	C08362	HMDB0003229		-1.6733	1.8706		-0.2052	0.7403	-1.3238	-1.4642	-1.6572	-1.8917		Lipid	Long Chain Monounsaturated Fatty Acid	452
	1531			10-heptadecenoate (17:1n7)		HMDB0060038		-1.8404	1.9291		-0.5726	0.4047	-1.3534	-1.2596	-1.4569	-1.5751		Lipid	Long Chain Monounsaturated Fatty Acid	100001278
	1533			oleate/vaccenate (18:1)	C01712 C08367 C00712 C21944	HMDB0000207 HMDB0000573 HMDB0003231 HMDB0240219		-2.0506	1.5578		-0.1922	0.9883	-1.3307	-1.516	-1.7613	-2.2376		Lipid	Long Chain Monounsaturated Fatty Acid	100008930
	1540			10-nonadecenoate (19:1n9)		HMDB0013622		-1.8309	1.9099		-0.9089	0.2671	-1.2961	-1.4218	-1.7232	-2.0586		Lipid	Long Chain Monounsaturated Fatty Acid	100001277
	1543			eicosenoate (20:1)	C16526	HMDB0002231 HMDB0062436		-1.7606	1.9476		-0.3424	1.12	-1.3822	-1.8343	-2.0319	-2.5575		Lipid	Long Chain Monounsaturated Fatty Acid	100001335
	1547			erucate (22:1n9)	C08316	HMDB0002068		-1.7377	2.0587		-1.4269	-0.0777	-1.5566	-2.2333	-2.1059	-2.7434		Lipid	Long Chain Monounsaturated Fatty Acid	1087
	1549			nervonate (24:1n9)*	C08323	HMDB0002368		-2.1371	1.8041									Lipid	Long Chain Monounsaturated Fatty Acid	100001231
	1557		Long Chain Polyunsaturated Fatty Acid (n3 and n6)	stearidonate (18:4n3)	C16300	HMDB0006547			1.818		0.4569	0.8585	-0.7396	-0.83	-0.1411	-0.9285		Lipid	Long Chain Polyunsaturated Fatty Acid (n3 and n6)	100001229
	1560			eicosapentaenoate (EPA; 20:5n3)	C06428	HMDB0001999		-1.8228	1.998		0.0517	0.6555	0.1973	-0.5863	-0.2538	-0.6597		Lipid	Long Chain Polyunsaturated Fatty Acid (n3 and n6)	2050
	1562			docosapentaenoate (n3 DPA; 22:5n3)	C16513	HMDB0001976 HMDB0006528		-1.8782	2.0313		-0.8657	0.1581	-0.5024	-1.2641	-1.5836	-2.2149		Lipid	Long Chain Polyunsaturated Fatty Acid (n3 and n6)	100001181
	1563			docosahexaenoate (DHA; 22:6n3)	C06429	HMDB0002183		-2.048	1.8509		-1.0783	-0.0132	-1.338	-2.3503	-1.0497	-1.9226		Lipid	Long Chain Polyunsaturated Fatty Acid (n3 and n6)	100000665
	1566			hexadecadienoate (16:2n6)		HMDB0000477		-2.2371	1.7881		-0.2439	0.6207	-2.2692	-2.183	-2.4656	-2.3436		Lipid	Long Chain Polyunsaturated Fatty Acid (n3 and n6)	100009394
	1567			linoleate (18:2n6)	C01595	HMDB0000673 HMDB0006270		-1.9797	1.582		-0.0245	1.1518	-1.0841	-1.2665	-1.4256	-1.9326		Lipid	Long Chain Polyunsaturated Fatty Acid (n3 and n6)	180
	1569			linolenate [alpha or gamma; (18:3n3 or 6)]	C06426 C06427	HMDB0001388 HMDB0003073		-1.9358	1.6907		0.4705	1.458	-0.9952	-0.9667	-0.8004	-1.2637		Lipid	Long Chain Polyunsaturated Fatty Acid (n3 and n6)	100001337
	1570			dihomo-linoleate (20:2n6)	C16525	HMDB0005060		-1.7498	2.0779		-0.9509	0.4284	-1.4551	-2.059	-2.1529	-2.7959		Lipid	Long Chain Polyunsaturated Fatty Acid (n3 and n6)	1231
	1572			dihomo-linolenate (20:3n3 or n6)	C03242	HMDB0002925		-2.1522	1.9093		-0.8132	0.5591	0.432	-0.8935	-1.2509	-2.4487		Lipid	Long Chain Polyunsaturated Fatty Acid (n3 and n6)	100001739
	1573			arachidonate (20:4n6)	C00219	HMDB0001043		-2.0457	2.0045		-1.2352	-0.0318	0.0267	-1.5157	-2.0754	-3.2301		Lipid	Long Chain Polyunsaturated Fatty Acid (n3 and n6)	229
	1575			adrenate (22:4n6)	C16527	HMDB0002226			1.7368		-2.4188	-0.5721	-1.8574	-2.5921	-2.2017			Lipid	Long Chain Polyunsaturated Fatty Acid (n3 and n6)	100001193
	1576			docosapentaenoate (n6 DPA; 22:5n6)	C16513	HMDB0001976		-2.0654	1.8813		-1.3928	-0.3271	-0.6706	-1.7369	-1.6122	-2.3623		Lipid	Long Chain Polyunsaturated Fatty Acid (n3 and n6)	100001580
	1577			docosadienoate (22:2n6)	C16533	HMDB0061714		-1.926	2.1384		-1.1538	-0.0091	-1.4695	-2.0614	-1.7719	-2.3677		Lipid	Long Chain Polyunsaturated Fatty Acid (n3 and n6)	100001182
	1642		Fatty Acid, Branched	(14 or 15)-methylpalmitate (a17:0 or i17:0)	C16995	HMDB0061859			1.6203		-0.4308	0.171	-0.3614	-0.4497	-0.5444	-0.8705		Lipid	Fatty Acid, Branched	100002945
	1648			(16 or 17)-methylstearate (a19:0 or i19:0)		HMDB0037397		-1.8013	1.9532		-1.3149	-0.4183	-0.987	-1.2316	-1.3773	-1.8993		Lipid	Fatty Acid, Branched	100002356
	1652			pristanate		HMDB0000795												Lipid	Fatty Acid, Branched	477
	1659		Fatty Acid, Dicarboxylate	glutarate (C5-DC)	C00489	HMDB0000661			1.8266		1.4631	1.7764	2.1646	1.1792	-0.1423	-1.744		Lipid	Fatty Acid, Dicarboxylate	339
	1663			2-hydroxyglutarate	C02630	HMDB0059655		-1.9713	2.263		0.3811	-1.8674	-1.3013	-0.0766				Lipid	Fatty Acid, Dicarboxylate	100002070
	1664			4-hydroxy-2-oxoglutaric acid	C01127	HMDB0002070			1.5458		1.4226	0.9033	1.0673	1.6669	1.4489	1.3142		Lipid	Fatty Acid, Dicarboxylate	100002537
	1665			adipate (C6-DC)	C06104	HMDB0000448			1.7993									Lipid	Fatty Acid, Dicarboxylate	100000863
	1671			maleate	C01384	HMDB0000176			2.4238		-0.8248	-0.4617	-0.3074	-1.1643	0.6401	-0.8953		Lipid	Fatty Acid, Dicarboxylate	100000707
	1676			suberate (C8-DC)	C08278	HMDB0000893			2.0053									Lipid	Fatty Acid, Dicarboxylate	100000016
	1679			azelate (C9-DC)	C08261	HMDB0000784		-1.9168	2.2398		-0.6536	0.3145	-0.5374	-1.1311	-0.5557	-0.7401		Lipid	Fatty Acid, Dicarboxylate	2029
	1681			sebacate (C10-DC)	C08277	HMDB0000792			2.2159		0.3178	1.1442	-0.5707	0.0272	5.7247	0.7566		Lipid	Fatty Acid, Dicarboxylate	100001211
	1686			dodecanedioate (C12-DC)	C02678	HMDB0000623		-1.5823	2.4788		-1.3902	-0.41	-1.2704	-1.7078	4.6656	-0.4936		Lipid	Fatty Acid, Dicarboxylate	100001102
	1691			tetradecanedioate (C14-DC)		HMDB0000872		-1.9551	2.2661		-1.1949	-0.4848	-0.9016	-1.2082	0.5483	-1.4342		Lipid	Fatty Acid, Dicarboxylate	100001613
	1695			hexadecanedioate (C16-DC)	C19615	HMDB0000672		-1.7199	2.1443		-1.1887	-0.5604	-1.0983	-1.0092	-0.3695	-1.5746		Lipid	Fatty Acid, Dicarboxylate	100001614
	1698			octadecanedioate (C18-DC)		HMDB0000782		-2.0667	2.3171		-3.752	-2.3241	-3.324	-3.9166	-3.7426	-4.5306		Lipid	Fatty Acid, Dicarboxylate	100001615
	1702			eicosanedioate (C20-DC)					1.5981		-1.192	-0.9991	-1.0713	-1.3359	-1.4733	-1.3113		Lipid	Fatty Acid, Dicarboxylate	100002951
	1704			docosadioate (C22-DC)	C14240	HMDB0061714		-1.7378	2.2262		-1.0474	-0.945	-0.8588	-1.0225	-0.344	-1.1814		Lipid	Fatty Acid, Dicarboxylate	100002952
	1705			3-carboxy-4-methyl-5-propyl-2-furanpropanoate (CMPF)		HMDB0061112		-1.5064	2.4405		1.7453	1.7366	0.4705	0.301	2.2559	2.2371		Lipid	Fatty Acid, Dicarboxylate	100001178
	1750		Fatty Acid, Amino	2-aminoheptanoate		HMDB0094649		-1.9742	2.1458		-0.985	-0.5191	-1.4364	-0.855	0.2705	0.2153		Lipid	Fatty Acid, Amino	100004542
	1755			2-aminooctanoate		HMDB0000991		-2.2713	1.7769		0.0214	0.4593	-0.413	-0.3194	-0.0865	0.2619		Lipid	Fatty Acid, Amino	100004227
	1768		Fatty Acid Metabolism (also BCAA Metabolism)	butyrylcarnitine (C4)	C02862	HMDB0002013			2.2597		-0.1492	1.0125	0.4815	0.2532	1.7415	0.9275		Lipid	Fatty Acid Metabolism (also BCAA Metabolism)	100001054
	1769			butyrylglycine		HMDB0000808												Lipid	Fatty Acid Metabolism (also BCAA Metabolism)	100001151
	1771			propionylcarnitine (C3)	C03017	HMDB0000824		-2.1233	1.942		-0.6338	0.4226	0.7208	0.3711	0.7524	0.2939		Lipid	Fatty Acid Metabolism (also BCAA Metabolism)	100001162
	1772			propionylglycine		HMDB0000783			1.5371		1.0216		1.0491	1.0456	1.1391	0.9892		Lipid	Fatty Acid Metabolism (also BCAA Metabolism)	100001150
	1774			methylmalonate (MMA)	C02170	HMDB0000202			1.8264		-0.5186	-0.1374	0.2032	-0.24	-0.1149	-0.2396		Lipid	Fatty Acid Metabolism (also BCAA Metabolism)	418
	1781		Fatty Acid Metabolism (Acyl Glutamine)	hexanoylglutamine					1.8447		-1.0049	0.2025	-0.865	-0.474	1.2977	-0.4879		Lipid	Fatty Acid Metabolism (Acyl Glutamine)	100001733
	1823		Fatty Acid Metabolism (Acyl Glycine)	N-palmitoylglycine		HMDB0013034		-1.8272	2.0783		-3.1383	-1.379	-1.5008	-1.8497	-2.1391	-2.6127		Lipid	Fatty Acid Metabolism (Acyl Glycine)	100003686
	1840		Fatty Acid Metabolism (Acyl Carnitine, Short Chain)	acetylcarnitine (C2)	C02571	HMDB0000201		-2.1405	1.8847		-0.6818	0.947	-0.6859	-0.4568	0.5595	-0.0468		Lipid	Fatty Acid Metabolism (Acyl Carnitine, Short Chain)	100000802
	1844		Fatty Acid Metabolism (Acyl Carnitine, Medium Chain)	hexanoylcarnitine (C6)		HMDB0000756		-1.9391	1.6994		-0.1163	1.3785	-0.6068	-0.1409	1.3566	0.2632		Lipid	Fatty Acid Metabolism (Acyl Carnitine, Medium Chain)	100000781
	1852			octanoylcarnitine (C8)	C02838	HMDB0000791		-2.162	1.7609		-0.1816	1.0332	-1.1957	-0.5093	-0.4461	-1.0827		Lipid	Fatty Acid Metabolism (Acyl Carnitine, Medium Chain)	100001247
	1860			decanoylcarnitine (C10)		HMDB0000651		-2.2673	1.6795		-0.1279	1.2196	-1.0571	-0.4624	-0.2872	-1.1242		Lipid	Fatty Acid Metabolism (Acyl Carnitine, Medium Chain)	100001251
	1861			laurylcarnitine (C12)		HMDB000225		-2.21	1.7101		-1.0663	0.4348	-1.4156	-1.0186	-0.7721	-1.3049		Lipid	Fatty Acid Metabolism (Acyl Carnitine, Medium Chain)	100001392
	1862		Fatty Acid Metabolism (Acyl Carnitine, Long Chain Saturated)	myristoylcarnitine (C14)		HMDB000506		-2.2273	2.0371									Lipid	Fatty Acid Metabolism (Acyl Carnitine, Long Chain Saturated)	100001270
	1864			palmitoylcarnitine (C16)	C02990	HMDB0000222		-1.8928	2.6183		-3.0136	-2.0194	-2.2928	-2.7386	-2.9433	-2.3187		Lipid	Fatty Acid Metabolism (Acyl Carnitine, Long Chain Saturated)	100000776
	1865			margaroylcarnitine (C17)*		HMDB0006210			2.053									Lipid	Fatty Acid Metabolism (Acyl Carnitine, Long Chain Saturated)	100004054
	1866			stearoylcarnitine (C18)		HMDB0000848		-1.9677	2.652		-1.7315	-0.3358	-0.821	-1.0651	-1.568	-0.7317		Lipid	Fatty Acid Metabolism (Acyl Carnitine, Long Chain Saturated)	100001391
	1867			arachidoylcarnitine (C20)*		HMDB0006460			1.9225									Lipid	Fatty Acid Metabolism (Acyl Carnitine, Long Chain Saturated)	100015833
	1868			behenoylcarnitine (C22)*		HMDB0062468			1.7972		-0.1664	0.6863	0.315	0.1243	0.0274	0.1503		Lipid	Fatty Acid Metabolism (Acyl Carnitine, Long Chain Saturated)	100015832
	1869			lignoceroylcarnitine (C24)*				-2.0401	1.8906		-0.7168	-0.1162	-0.2933	-0.4248	-0.7254	-0.9197		Lipid	Fatty Acid Metabolism (Acyl Carnitine, Long Chain Saturated)	100015834
	1870			cerotoylcarnitine (C26)*		HMDB0006347		-2.1135	1.9442		0.5756	0.8795	1.034	1.0116	1.4756	1.28		Lipid	Fatty Acid Metabolism (Acyl Carnitine, Long Chain Saturated)	100015835
	1880		Fatty Acid Metabolism (Acyl Carnitine, Monounsaturated)	cis-4-decenoylcarnitine (C10:1)		HMDB0013205		-2.143	1.8546		0.3692	1.4124	-0.5102	0.0361	-1.0216	-0.5736		Lipid	Fatty Acid Metabolism (Acyl Carnitine, Monounsaturated)	100002259
	1884			myristoleoylcarnitine (C14:1)*		HMDB0240588		-1.9954	2.0719		0.1872	1.8114	-0.6865	-0.1775	-1.3678	-0.7025		Lipid	Fatty Acid Metabolism (Acyl Carnitine, Monounsaturated)	100006051
	1885			palmitoleoylcarnitine (C16:1)*				-1.8301	2.1629									Lipid	Fatty Acid Metabolism (Acyl Carnitine, Monounsaturated)	100009406
	1886			oleoylcarnitine (C18:1)		HMDB0005065		-1.9536	2.3683		-1.8301	-0.9034	-2.4372	-2.3812	-2.9304	-2.4591		Lipid	Fatty Acid Metabolism (Acyl Carnitine, Monounsaturated)	100001501
	1887			eicosenoylcarnitine (C20:1)*				-2.2982	2.2578									Lipid	Fatty Acid Metabolism (Acyl Carnitine, Monounsaturated)	100015838
	1889			nervonoylcarnitine (C24:1)*					1.6737									Lipid	Fatty Acid Metabolism (Acyl Carnitine, Monounsaturated)	100015846
	1890			ximenoylcarnitine (C26:1)*				-2.444	1.9062		1.0222	1.779	0.9892	0.3561	0.6836	-0.0701		Lipid	Fatty Acid Metabolism (Acyl Carnitine, Monounsaturated)	100015836
	1891		Fatty Acid Metabolism (Acyl Carnitine, Polyunsaturated)	linoleoylcarnitine (C18:2)*		HMDB0006469		-1.8124	2.379		-1.3103	-0.8719	-1.4697	-1.6163	-1.6047	-1.6217		Lipid	Fatty Acid Metabolism (Acyl Carnitine, Polyunsaturated)	100003151
	1892			linolenoylcarnitine (C18:3)*					2.0491									Lipid	Fatty Acid Metabolism (Acyl Carnitine, Polyunsaturated)	100015831
	1893			dihomo-linoleoylcarnitine (C20:2)*				-1.7427	2.316									Lipid	Fatty Acid Metabolism (Acyl Carnitine, Polyunsaturated)	100015839
	1894			arachidonoylcarnitine (C20:4)		HMDB0006455		-1.8691	2.0972									Lipid	Fatty Acid Metabolism (Acyl Carnitine, Polyunsaturated)	100015837
	1895			dihomo-linolenoylcarnitine (C20:3n3 or 6)*				-1.7036	2.3089		-1.4363	-1.5223	-0.8142	-1.3447	-1.3468	-1.3795		Lipid	Fatty Acid Metabolism (Acyl Carnitine, Polyunsaturated)	100015840
	1899			adrenoylcarnitine (C22:4)*					1.7963									Lipid	Fatty Acid Metabolism (Acyl Carnitine, Polyunsaturated)	100015850
	1900			docosapentaenoylcarnitine (C22:5n3)*														Lipid	Fatty Acid Metabolism (Acyl Carnitine, Polyunsaturated)	100015851
	1902			docosahexaenoylcarnitine (C22:6)*														Lipid	Fatty Acid Metabolism (Acyl Carnitine, Polyunsaturated)	100015845
	1907		Fatty Acid Metabolism (Acyl Carnitine, Dicarboxylate)	adipoylcarnitine (C6-DC)		HMDB0061677		-1.8529	1.9483		-0.7665	0.4983	-1.5545	-1.0785	0.462	-0.0901		Lipid	Fatty Acid Metabolism (Acyl Carnitine, Dicarboxylate)	100006614
	1914			pimeloylcarnitine/3-methyladipoylcarnitine (C7-DC)					1.6074									Lipid	Fatty Acid Metabolism (Acyl Carnitine, Dicarboxylate)	100009407
	1915			suberoylcarnitine (C8-DC)														Lipid	Fatty Acid Metabolism (Acyl Carnitine, Dicarboxylate)	100006627
	1919		Fatty Acid Metabolism (Acyl Carnitine, Hydroxy)	(R)-3-hydroxybutyrylcarnitine		HMDB0013127			1.8896		-0.4998	1.2622		-0.1999	0.4866	-0.5001		Lipid	Fatty Acid Metabolism (Acyl Carnitine, Hydroxy)	100003926
	1920			(S)-3-hydroxybutyrylcarnitine		HMDB0013127		-1.6693	2.225		-0.1365	1.6484	-0.2962	-0.5798	1.4256	-0.2018		Lipid	Fatty Acid Metabolism (Acyl Carnitine, Hydroxy)	100009271
	1931		Carnitine Metabolism	deoxycarnitine	C01181	HMDB0001161		-1.9878	2.2844		-1.2261	-1.1496	-1.4712	-1.4849	-2.1877	-1.7237		Lipid	Carnitine Metabolism	100001662
	1932			carnitine	C00487 C00308	HMDB0000062		-2.6381	1.7108		0.8068	1.2324	1.8273	1.9811	1.7438	1.9026		Lipid	Carnitine Metabolism	100000007
	1938		Ketone Bodies	3-hydroxybutyrate (BHBA)	C03197 C01089	HMDB0000011 HMDB0000357 HMDB0000442		-1.4322	2.3286		-0.2014	1.2675	-0.3187	-0.286	1.0371	-0.5798		Lipid	Ketone Bodies	254
	1944		Fatty Acid Metabolism (Acyl Choline)	oleoylcholine		HMDB0240596			1.9638									Lipid	Fatty Acid Metabolism (Acyl Choline)	100009331
	1947			dihomo-linolenoyl-choline														Lipid	Fatty Acid Metabolism (Acyl Choline)	100009335
	1948			linoleoylcholine*		HMDB0013213			1.7714									Lipid	Fatty Acid Metabolism (Acyl Choline)	100015760
	1950			stearoylcholine*					1.9609									Lipid	Fatty Acid Metabolism (Acyl Choline)	100015759
	1951			docosahexaenoylcholine														Lipid	Fatty Acid Metabolism (Acyl Choline)	100009333
	1952			arachidonoylcholine		HMDB0240583			1.8719									Lipid	Fatty Acid Metabolism (Acyl Choline)	100009332
	1958		Fatty Acid, Monohydroxy	alpha-hydroxycaproate		HMDB0001624			1.5075				0.3335	0.2785	0.016	1.9373		Lipid	Fatty Acid, Monohydroxy	100001723
	1960			2-hydroxyoctanoate		HMDB0002264		-1.9705	2.1293		-0.6175	-0.0554	-0.8773	-0.8958	-0.7771	-1.0971		Lipid	Fatty Acid, Monohydroxy	100000743
	1962			2-hydroxydecanoate		HMDB0094656		-1.673	2.162		1.0869	1.446	0.3776	0.8234	-1.0038	0.1478		Lipid	Fatty Acid, Monohydroxy	100004089
	1968			2-hydroxypalmitate		HMDB0031057		-1.9946	2.0244		-3.0008	-0.8772	-0.2025	-1.7979	-1.3465	-3.6805		Lipid	Fatty Acid, Monohydroxy	100001579
	1971			2-hydroxystearate	C03045 C03042	HMDB0062549			1.6106		-1.312	-0.1125	0.7637	-0.0451	0.1461	-0.9306		Lipid	Fatty Acid, Monohydroxy	1239
	1979			3-hydroxyhexanoate		HMDB0061652 HMDB0010718		-1.9928	2.065		-1.0124	0.3558	-1.3205	-1.7304	-0.4818	-1.7692		Lipid	Fatty Acid, Monohydroxy	100006367
	1980			3-hydroxyoctanoate	C20793	HMDB0001954		-2.0935	1.8327		-0.6453	0.1798	-1.2946	-1.3239	-0.4679	-1.0382		Lipid	Fatty Acid, Monohydroxy	100000773
	1982			3-hydroxydecanoate		HMDB0002203		-1.8741	1.8258		-1.2109	-0.1014	-1.6821	-1.749	-1.5781	-1.3852		Lipid	Fatty Acid, Monohydroxy	100000997
	1984			3-hydroxysebacate		HMDB0000350			1.8716		-1.2892	0.3748	-0.9239	-0.9399	1.2357	-0.8627		Lipid	Fatty Acid, Monohydroxy	100001145
	1985			3-hydroxylaurate		HMDB0000387		-3.2586	1.7942		-3.0666	-0.9266	-3.1003	-3.7415	-3.9264	-3.2992		Lipid	Fatty Acid, Monohydroxy	100001112
	1995			5-hydroxyhexanoate		HMDB0000525 HMDB0000409			1.5722									Lipid	Fatty Acid, Monohydroxy	100001148
	2014			13-HODE + 9-HODE	C14767 C14762	HMDB0004667 HMDB0004670			1.7305									Lipid	Fatty Acid, Monohydroxy	100002196
	2030		Fatty Acid, Dihydroxy	12,13-DiHOME	C14829	HMDB0004705												Lipid	Fatty Acid, Dihydroxy	62
	2031			9,10-DiHOME	C14828	HMDB0004704												Lipid	Fatty Acid, Dihydroxy	179
	2159		Endocannabinoid	oleoyl ethanolamide		HMDB0002088		-1.9523	1.9318									Lipid	Endocannabinoid	1137
	2162			palmitoyl ethanolamide	C16512	HMDB0002100		-1.7887	5.2592									Lipid	Endocannabinoid	1489
	2163			stearoyl ethanolamide		HMDB0013078		-1.6745	5.1305		-1.2869	-0.9173	-1.3924	-1.5842	-1.3688	-1.6392		Lipid	Endocannabinoid	100002254
	2172			N-oleoyltaurine														Lipid	Endocannabinoid	100003119
	2173			N-stearoyltaurine					1.7326									Lipid	Endocannabinoid	100003240
	2174			N-palmitoyltaurine					1.5363									Lipid	Endocannabinoid	100003239
	2182			linoleoyl ethanolamide		HMDB0012252			1.7792									Lipid	Endocannabinoid	100006726
	2196			N-oleoylserine					1.7492									Lipid	Endocannabinoid	100015641
	2198			N-palmitoylserine					1.7288									Lipid	Endocannabinoid	100015640
	2201		Inositol Metabolism	myo-inositol	C00137	HMDB0000211		-2.5271	1.8157		0.0891	0.851	0.2788	0.059	0.2445	0.2102		Lipid	Inositol Metabolism	363
	2232		Phospholipid Metabolism	choline	C00114	HMDB0000097		-2.0673	1.9852		-2.1558	-1.1342	-1.2628	-1.1132	-2.1554	-0.7031		Lipid	Phospholipid Metabolism	1256
	2233			choline phosphate	C00588	HMDB0001565		-1.8984	1.9267		-1.9368	-2.3691	-2.3532	-2.7442	-1.4558	0.3622		Lipid	Phospholipid Metabolism	267
	2236			glycerophosphorylcholine (GPC)	C00670	HMDB0000086		-2.0078	2.6362		-1.8248	-1.3358	-0.2797	-1.9611	-2.0115	-1.0926		Lipid	Phospholipid Metabolism	100000269
	2238			phosphoethanolamine	C00346	HMDB0000224		-2.1738	1.5575		-2.507	-2.6296	-2.2312	-2.9393	-1.9141	-0.2879		Lipid	Phospholipid Metabolism	1026
	2240			glycerophosphoethanolamine	C01233	HMDB0000114		-1.8987	2.236		-0.6104	-0.5273	0.0722	-1.3044	-0.9836	-0.254		Lipid	Phospholipid Metabolism	100001620
	2242			glycerophosphoinositol*					1.624									Lipid	Phospholipid Metabolism	100001621
	2243			trimethylamine N-oxide	C01104	HMDB0000925		-2.5019	2.0028		0.6388	0.0803	1.3053	-0.1623	-0.1259	1.1568		Lipid	Phospholipid Metabolism	100003397
	2259		Phosphatidylcholine (PC)	phosphatidylcholine (14:0/14:0, 16:0/12:0)				-2.6326	1.6147		-1.3333	-1.4413	0.9989	-0.2977	2.1704	1.772		Lipid	Phosphatidylcholine (PC)	100009346
	2262			1-myristoyl-2-palmitoyl-GPC (14:0/16:0)		HMDB0007869		-2.2385	1.6804		-0.8105	-1.1522	0.8489	-0.1778	0.8691	0.6519		Lipid	Phosphatidylcholine (PC)	100000672
	2263			1-myristoyl-2-palmitoleoyl-GPC (14:0/16:1)*		HMDB0007870			1.5145									Lipid	Phosphatidylcholine (PC)	100009150
	2265			1-myristoyl-2-linoleoyl-GPC (14:0/18:2)*		HMDB0007874		-2.1133	1.9136		0.3889	-0.085	1.7051	0.8976	1.6595	1.7793		Lipid	Phosphatidylcholine (PC)	100009138
	2266			1-myristoyl-2-arachidonoyl-GPC (14:0/20:4)*		HMDB0007883		-2.05	1.887		0.0393	-0.7074	1.2121	0.5959	1.11	1.4165		Lipid	Phosphatidylcholine (PC)	100009139
	2268			1-myristoyl-2-docosahexaenoyl-GPC (14:0/22:6)*		HMDB0007892		-2.4537	1.683									Lipid	Phosphatidylcholine (PC)	100009140
	2270			phosphatidylcholine (15:0/18:1, 17:0/16:1, 16:0/17:1)*				-1.9648	1.7391		-0.0711	0.054	0.873	0.407	0.3406	-0.0468		Lipid	Phosphatidylcholine (PC)	100009347
	2271			1-pentadecanoyl-2-linoleoyl-GPC (15:0/18:2)*		HMDB0007940		-2.1307	1.547		0.4805	0.5215	1.1028	1.1806	0.9556	0.716		Lipid	Phosphatidylcholine (PC)	100009035
	2272			1-pentadecanoyl-2-arachidonoyl-GPC (15:0/20:4)*		HMDB0007949		-1.7678	1.6408		-0.3416	-0.3765	0.5056	0.4077	-0.2865	-0.1603		Lipid	Phosphatidylcholine (PC)	100009122
	2273			1-pentadecanoyl-2-docosahexaenoyl-GPC (15:0/22:6)*		HMDB0007958		-2.0725	1.7986		0.0131	-0.0247	-0.6885	-0.4429	0.4268	0.6378		Lipid	Phosphatidylcholine (PC)	100009123
	2278			1,2-dipalmitoyl-GPC (16:0/16:0)	D03585	HMDB0000564		-1.9204	2.0701		-1.3209	-1.4436	-0.531	-1.7251	-0.4848	0.1802		Lipid	Phosphatidylcholine (PC)	100000657
	2279			1-palmitoyl-2-palmitoleoyl-GPC (16:0/16:1)*		HMDB0007969		-1.8656	2.0292		-0.2192	-0.44	1.0993	0.2296	0.4778	0.3551		Lipid	Phosphatidylcholine (PC)	100008984
	2281			1-palmitoyl-2-stearoyl-GPC (16:0/18:0)	C03889	HMDB0007970		-1.726	2.6474		0.214	-0.6665	1.2909	-1.3005	0.7341	0.9559		Lipid	Phosphatidylcholine (PC)	100008921
	2283			1-palmitoyl-2-oleoyl-GPC (16:0/18:1)	C13875	HMDB0007972		-2.0674	1.9984		-0.581	-0.2417	0.299	-0.1647	-0.1294	-0.5739		Lipid	Phosphatidylcholine (PC)	1539
	2286			1-palmitoyl-2-linoleoyl-GPC (16:0/18:2)		HMDB0007973		-2.5182	1.9137		0.1791	0.5707	0.9955	0.7911	1.0448	0.6321		Lipid	Phosphatidylcholine (PC)	1537
	2287			1-palmitoyl-2-(hydroxylinoleoyl)-GPC (16:0/18:2(OH))*					2.3013		3.3285	3.3522	2.9419	2.8755	0.5276	0.3632		Lipid	Phosphatidylcholine (PC)	100015689
	2297			1-palmitoyl-2-arachidonoyl-GPC (16:0/20:4n6)	C05208	HMDB0007982		-2.2834	1.7982		-1.0666	-0.819	-0.2489	-0.8375	-0.4117	-0.7312		Lipid	Phosphatidylcholine (PC)	100008914
	2298			1-palmitoyl-2-eicosapentaenoyl-GPC (16:0/20:5)*		HMDB0007984		-1.8411	1.8048		0.5361	0.2202	0.9046	0.9309	1.6378	1.6651		Lipid	Phosphatidylcholine (PC)	100008989
	2299			1-palmitoyl-2-adrenoyl-GPC (16:0/22:4)*		HMDB0007988		-2.0397	1.8546		-1.1301	-0.8941	0.682	0.4271	-0.2838	-0.4237		Lipid	Phosphatidylcholine (PC)	100009143
	2301			phosphatidylcholine (16:0/22:5n3, 18:1/20:4)*				-1.9779	1.9587		-0.1447	0.2094	0.8745	0.633	-0.6393	-0.5571		Lipid	Phosphatidylcholine (PC)	100009166
	2303			1-palmitoyl-2-docosahexaenoyl-GPC (16:0/22:6)		HMDB0007991		-2.0215	1.7552		-0.3669	0.4422	-1.1189	-1.1062	0.6586	0.8449		Lipid	Phosphatidylcholine (PC)	100008915
	2310			1-palmitoleoyl-2-linolenoyl-GPC (16:1/18:3)*		HMDB0008008			1.5923		0.8404	0.7076	1.2187	1.0796	1.1333	1.0242		Lipid	Phosphatidylcholine (PC)	100009345
	2317			1-margaroyl-2-linoleoyl-GPC (17:0/18:2)*				-2.3673	1.7403		1.2936	1.6681	1.5565	1.5758	1.4949	1.0167		Lipid	Phosphatidylcholine (PC)	100009037
	2318			1-margaroyl-2-arachidonoyl-GPC (17:0/20:4)*				-1.9715	1.7113		-0.254	-0.3159	-0.4997	-0.4318	-0.9384	-0.8202		Lipid	Phosphatidylcholine (PC)	100009124
	2319			1-margaroyl-2-docosahexaenoyl-GPC (17:0/22:6)*					1.7924									Lipid	Phosphatidylcholine (PC)	100009125
	2322			1-stearoyl-2-oleoyl-GPC (18:0/18:1)		HMDB0008038		-2.1087	2.2588		0.9493	0.4532	1.588	0.4306	1.1643	0.0914		Lipid	Phosphatidylcholine (PC)	100008904
	2325			1-stearoyl-2-linoleoyl-GPC (18:0/18:2)*		HMDB0008039		-2.7229	1.8439		1.2051	1.0545	1.193	0.8523	1.3431	0.5542		Lipid	Phosphatidylcholine (PC)	100008980
	2328			phosphatidylcholine (18:0/20:2, 20:0/18:2)*				-2.3378	1.987		1.8414	1.0423	2.6835	1.3644	2.731	1.5048		Lipid	Phosphatidylcholine (PC)	100009364
	2329			1-stearoyl-2-dihomo-linolenoyl-GPC (18:0/20:3n3 or 6)*		HMDB0008047		-2.2103	1.6302		0.6504	0.8578	1.5759	1.4591	1.3578	0.9666		Lipid	Phosphatidylcholine (PC)	100009051
	2333			1-stearoyl-2-arachidonoyl-GPC (18:0/20:4)		HMDB0008048		-2.3211	1.9048		0.1277	0.1807	0.2722	-0.2334	-0.1699	-0.685		Lipid	Phosphatidylcholine (PC)	100001869
	2336			1-stearoyl-2-adrenoyl-GPC (18:0/22:4)*		HMDB0008054		-2.1511	1.9529		-1.4383	-0.9543	0.7919	0.4069	-1.1382	-1.2686		Lipid	Phosphatidylcholine (PC)	100009146
	2337			1-stearoyl-2-docosapentaenoyl-GPC (18:0/22:5n3)*		HMDB0008056		-2.1243	1.6878		0.2206	0.1198	0.7737	0.5214	0.2953	-0.0147		Lipid	Phosphatidylcholine (PC)	100009141
	2338			1-stearoyl-2-docosapentaenoyl-GPC (18:0/22:5n6)*		HMDB0008055		-2.2827	1.7547		-1.6834	-1.2099	-0.6849	-0.6959	-1.1981	-0.8975		Lipid	Phosphatidylcholine (PC)	100009142
	2339			1-stearoyl-2-docosahexaenoyl-GPC (18:0/22:6)		HMDB0008057		-1.8611	1.706		0.1253	0.3062	-1.1133	-1.3993	0.6082	0.4513		Lipid	Phosphatidylcholine (PC)	100008916
	2358			1-oleoyl-2-docosahexaenoyl-GPC (18:1/22:6)*		HMDB0008123		-2.2118	1.8539		1.4877	2.1769	0.4232	0.0723	1.4588	1.4553		Lipid	Phosphatidylcholine (PC)	100009130
	2359			1,2-dilinoleoyl-GPC (18:2/18:2)		HMDB0008138		-2.2381	1.8086		0.7322	1.4466	1.781	1.2782	1.5374	0.8887		Lipid	Phosphatidylcholine (PC)	100008903
	2360			1-linoleoyl-2-linolenoyl-GPC (18:2/18:3)*		HMDB0008141		-2.4966	1.9502		1.6148	1.8051	1.9016	1.8319	2.1725	1.5687		Lipid	Phosphatidylcholine (PC)	100009343
	2365			1-linoleoyl-2-arachidonoyl-GPC (18:2/20:4n6)*	C05208	HMDB0008147		-2.3881	1.7974		0.2527	0.0401	1.2637	1.1483	0.6593	0.4259		Lipid	Phosphatidylcholine (PC)	100009131
	2369			1-linoleoyl-2-docosahexaenoyl-GPC (18:2/22:6)*		HMDB0008156		-2.3791	1.8407		-0.0779	0.6273	0.2722	-0.0513	1.0904	1.2799		Lipid	Phosphatidylcholine (PC)	100009132
	2374			1-arachidoyl-2-arachidonoyl-GPC (20:0/20:4)*		HMDB0008279		-2.4362	2.0327		0.4158	-0.1127	0.7082	-0.6296	-0.0324	0.7895		Lipid	Phosphatidylcholine (PC)	100009126
	2408		Phosphatidylethanolamine (PE)	1-palmitoyl-2-oleoyl-GPE (16:0/18:1)		HMDB0005320		-1.7447	2.4975		-0.8289	-0.2891	0.2274	-0.6363	-0.9448	-0.0257		Lipid	Phosphatidylethanolamine (PE)	1526
	2410			1-palmitoyl-2-linoleoyl-GPE (16:0/18:2)		HMDB0005322		-1.9008	1.9492		-0.7334	-0.1478	0.1109	-0.0281	0.0389	-0.2663		Lipid	Phosphatidylethanolamine (PE)	100001870
	2416			1-palmitoyl-2-arachidonoyl-GPE (16:0/20:4)*	C05210	HMDB0005323		-2.0344	2.3532		-2.5724	-1.7041	-1.5528	-1.7471	-2.3302	-0.9744		Lipid	Phosphatidylethanolamine (PE)	100008990
	2418			1-palmitoyl-2-docosahexaenoyl-GPE (16:0/22:6)*		HMDB0008946		-2.04	1.7449		-0.8633	0.0589	-1.5204	-1.3835	-0.0829	0.4883		Lipid	Phosphatidylethanolamine (PE)	100008991
	2425			1-stearoyl-2-oleoyl-GPE (18:0/18:1)		HMDB0008993		-1.9919	2.033		0.1316	0.5302	0.638	0.1822	0.1701	0.4918		Lipid	Phosphatidylethanolamine (PE)	100001856
	2429			1-stearoyl-2-linoleoyl-GPE (18:0/18:2)*		HMDB0008994		-2.1032	1.9551		0.2111	0.8303	0.8268	0.667	0.5881	0.3908		Lipid	Phosphatidylethanolamine (PE)	100008976
	2434			1-stearoyl-2-dihomo-linolenoyl-GPE (18:0/20:3n3 or 6)*		HMDB0009002		-2.0984	1.9179		0.4251	0.7397	1.2864	0.9902	0.7786	1.0647		Lipid	Phosphatidylethanolamine (PE)	100009215
	2438			1-stearoyl-2-arachidonoyl-GPE (18:0/20:4)	C05210	HMDB0009003		-2.0535	2.0169		-1.4789	-0.4332	-0.6046	-1.4143	-1.8067	0.4851		Lipid	Phosphatidylethanolamine (PE)	100008977
	2440			1-stearoyl-2-docosapentaenoyl-GPE (18:0/22:5n3)*		HMDB0009011			1.6247		-0.5632		0.21			0.8425		Lipid	Phosphatidylethanolamine (PE)	100015592
	2441			1-stearoyl-2-docosapentaenoyl-GPE (18:0/22:5n6)*		HMDB0009010			1.5954		-0.6077	-0.2288	0.0564	-0.0098	-0.6523	-0.1448		Lipid	Phosphatidylethanolamine (PE)	100015593
	2442			1-stearoyl-2-docosahexaenoyl-GPE (18:0/22:6)*		HMDB0009012		-2.2786	1.7661		-0.2231	-0.6105	-0.9192	-0.9915	0.4685	0.7473		Lipid	Phosphatidylethanolamine (PE)	100008992
	2444			1-oleoyl-2-linoleoyl-GPE (18:1/18:2)*		HMDB0005349		-2.1169	1.8157		0.818	1.147	1.0388	0.8905	0.8794	0.5131		Lipid	Phosphatidylethanolamine (PE)	100009078
	2448			phosphatidylethanolamine (P-18:1/20:4, P-16:0/22:5n3)*		HMDB0011360		-1.9144	2.2034		-0.1384	-0.195	1.1076	0.2998	-0.1876	-0.0039		Lipid	Phosphatidylethanolamine (PE)	100015687
	2505		Phosphatidylserine (PS)	1-stearoyl-2-oleoyl-GPS (18:0/18:1)		HMDB0010163		-1.8261	1.9866									Lipid	Phosphatidylserine (PS)	100000639
	2511			1-stearoyl-2-docosahexaenoyl-GPS (18:0/22:6)*		HMDB0010167												Lipid	Phosphatidylserine (PS)	100001873
	2534		Phosphatidylinositol (PI)	1-palmitoyl-2-oleoyl-GPI (16:0/18:1)*		HMDB0009783		-3.6007	1.929		-0.139		1.1122	-0.9854	0.9179	-2.0771		Lipid	Phosphatidylinositol (PI)	100009066
	2536			1-palmitoyl-2-linoleoyl-GPI (16:0/18:2)		HMDB0009784		-2.7434	1.8345		0.6188	-1.1574	1.5736	-0.3273	1.7835	-0.9132		Lipid	Phosphatidylinositol (PI)	1528
	2539			1-palmitoyl-2-arachidonoyl-GPI (16:0/20:4)*		HMDB0009789		-2.1872	1.8301		-0.4166	0.0643	-0.4823	0.8244	0.8184	0.0241		Lipid	Phosphatidylinositol (PI)	100008993
	2542			1-stearoyl-2-oleoyl-GPI (18:0/18:1)*					1.7577		0.5893	0.6108	1.338	0.5683	1.2834	0.3266		Lipid	Phosphatidylinositol (PI)	100009181
	2543			1-stearoyl-2-linoleoyl-GPI (18:0/18:2)		HMDB0009809		-2.1814	2.0379		0.3129	0.8766	0.6097	-0.8271	0.1331	0.5472		Lipid	Phosphatidylinositol (PI)	100008994
	2556			1-stearoyl-2-arachidonoyl-GPI (18:0/20:4)		HMDB0009815		-2.4556	1.8544		-0.9089	0.3888	0.6209	-0.2907	0.1211	0.1519		Lipid	Phosphatidylinositol (PI)	100000616
	2558			1-stearoyl-2-dihomo-linolenoyl-GPI (18:0/20:3n3 or 6)*		HMDB0009814		-2.5386	1.8233		-0.1755	1.1248	1.4321	1.4276	1.2224	0.9896		Lipid	Phosphatidylinositol (PI)	100009184
	2582		Lysophospholipid	1-palmitoyl-GPA (16:0)	C04036	HMDB00327			1.7456									Lipid	Lysophospholipid	100001445
	2587			1-linoleoyl-GPA (18:2)*		HMDB0007856			1.6445						-2.0992			Lipid	Lysophospholipid	100009082
	2592			1-arachidonoyl-GPA (20:4)		HMDB0062312			1.7163									Lipid	Lysophospholipid	100004442
	2595			1-myristoyl-GPC (14:0)	C04230	HMDB0010379		-2.1021	1.8899		-1.293	-1.3192	0.5124	-0.3426	0.2198	0.4011		Lipid	Lysophospholipid	100001383
	2596			2-myristoyl-GPC (14:0)*		HMDB0010379			1.8061		-1.2756	-1.2751	0.5051	-0.3384	0.3111	0.5032		Lipid	Lysophospholipid	100001563
	2599			1-pentadecanoyl-GPC (15:0)*		HMDB0010381		-2.0292	1.6765		-1.2065	-1.0884	0.1561	-0.2448	-0.5291	-0.4177		Lipid	Lysophospholipid	100002173
	2600			1-palmitoyl-GPC (16:0)	C04102	HMDB0010382		-2.0265	2.7874		-2.5225	-0.964	-0.418	-1.129	-1.1681	-1.0272		Lipid	Lysophospholipid	100001263
	2601			2-palmitoyl-GPC (16:0)*		HMDB0061702		-1.8933	2.6577		-3.2404	-1.6101	-0.8006	-2.2065	-1.5984	-3.2709		Lipid	Lysophospholipid	100001562
	2602			1-palmitoleoyl-GPC (16:1)*		HMDB0010383		-2.0083	1.7571		-1.0629	-0.5443	-0.0465	-0.2415	-0.7639	-0.7024		Lipid	Lysophospholipid	100001511
	2606			1-margaroyl-GPC (17:0)	C04230	HMDB0012108		-2.0197	1.9553		-1.4688	-0.8737	-0.2439	-0.5827	-0.7808	-0.9395		Lipid	Lysophospholipid	100001264
	2611			1-stearoyl-GPC (18:0)		HMDB0010384		-2.211	2.4734		-2.4422	-1.2435	-0.5831	-1.4609	-0.943	-1.3196		Lipid	Lysophospholipid	100001271
	2612			2-stearoyl-GPC (18:0)*				-2.1108	2.2172		-3.2159	-0.6208	-0.3187	-1.6337	-1.9817	-0.5397		Lipid	Lysophospholipid	100001555
	2613			1-oleoyl-GPC (18:1)	C03916	HMDB0002815		-2.0532	2.1612		-0.8806	-0.0581	0.3689	-0.3563	-0.5413	-0.6471		Lipid	Lysophospholipid	100001272
	2614			2-oleoyl-GPC (18:1)*		HMDB0061701		-1.884	2.2405		-1.5423	-0.1261	0.3207	-1.0753	-0.7701	-2.0567		Lipid	Lysophospholipid	100001556
	2616			1-linoleoyl-GPC (18:2)	C04100	HMDB0010386		-2.1676	1.8383		-0.3176	0.708	0.9823	0.8519	0.8743	0.7088		Lipid	Lysophospholipid	100001395
	2617			2-linoleoyl-GPC (18:2)*				-2.1408	1.9369		-1.0805	0.407	0.8542	-0.0372	0.3341	-1.0332		Lipid	Lysophospholipid	100001557
	2618			1-linolenoyl-GPC (18:3)*	C04100	HMDB0010388		-2.0105	1.9999		-0.436	-0.1233	1.3882	0.3054	1.3482	0.7917		Lipid	Lysophospholipid	100005350
	2621			1-nonadecanoyl-GPC (19:0)				-2.9608	2.0229		-0.9392	-0.4331	0.0192	-0.2597	-0.2215	-0.3407		Lipid	Lysophospholipid	100005353
	2624			1-arachidoyl-GPC (20:0)	C04230	HMDB0010390		-1.9897	2.11		-1.2747	-1.2125	0	-1.2406				Lipid	Lysophospholipid	100001384
	2627			1-eicosenoyl-GPC (20:1)*		HMDB0010391		-1.7367	2.5331		-0.4236	0.1363	0.1568	-1.1735	-1.0079	-0.6694		Lipid	Lysophospholipid	100005352
	2629			1-dihomo-linoleoyl-GPC (20:2)*		HMDB0010392		-1.9539	2.2514		-0.8619	-0.0859	0.6399	0.0331	-0.2316	-0.4333		Lipid	Lysophospholipid	100001553
	2630			1-dihomo-linolenoyl-GPC (20:3n3 or 6)*		HMDB0010394		-1.7295	2.0385		-0.4995	0.0828	1.141	0.6537	0.3329	0.2633		Lipid	Lysophospholipid	100001552
	2633			2-arachidonoyl-GPC (20:4)*		HMDB0061699		-1.9637	2.149		-2.6436	-1.3486	-0.3301	-2.6425	-2.3742	-5.3556		Lipid	Lysophospholipid	100001554
	2635			1-arachidonoyl-GPC (20:4n6)*	C05208	HMDB0010395		-2.025	1.9612		-1.4035	-0.8756	-0.2494	-0.7338	-1.2994	-1.1998		Lipid	Lysophospholipid	100001551
	2636			1-eicosapentaenoyl-GPC (20:5)*				-1.8629	2.0583		0.3074	0.1171	0.8761	0.4918	1.0313	1.178		Lipid	Lysophospholipid	100005351
	2638			1-behenoyl-GPC (22:0)		HMDB0010398			1.7646									Lipid	Lysophospholipid	100002868
	2641			1-adrenoyl-GPC (22:4)*		HMDB0010401		-1.9064	1.9641		-2.0246	-1.1043	0.3875	-0.1456	-1.9714	-2.1862		Lipid	Lysophospholipid	100002871
	2642			1-docosapentaenoyl-GPC (22:5n3)*				-1.9949	1.9242		-0.658	-0.1751	0.6646	0.3206	-0.4679	-0.6042		Lipid	Lysophospholipid	100002063
	2644			1-docosapentaenoyl-GPC (22:5n6)*				-2.1962	1.7861		-1.4318	-0.7943	-0.1165	-0.4382	-1.0536	-1.0665		Lipid	Lysophospholipid	100005673
	2645			1-docosahexaenoyl-GPC (22:6)*		HMDB0010404		-1.948	1.8559		-0.5104	0.109	-0.7698	-1.2057	0.0801	0.1414		Lipid	Lysophospholipid	100001566
	2646			2-docosahexaenoyl-GPC (22:6)*		HMDB0010404			1.6417									Lipid	Lysophospholipid	100001565
	2649			1-lignoceroyl-GPC (24:0)		HMDB0010405			1.6921									Lipid	Lysophospholipid	100002873
	2662			1-palmitoyl-GPE (16:0)		HMDB0011503		-2.0113	2.0361		-1.3694	-0.348	0.003	-0.7923	0.3403	0.1624		Lipid	Lysophospholipid	100001567
	2663			2-palmitoyl-GPE (16:0)*		HMDB11503		-3.9111	2.0266		-2.3771	-0.7183	-0.4355	-1.9212	-0.7557	-1.7268		Lipid	Lysophospholipid	100001652
	2668			1-margaroyl-GPE (17:0)*		HMDB0061691			1.721			-0.612	-0.2868		-0.7484			Lipid	Lysophospholipid	100002171
	2669			1-stearoyl-GPE (18:0)		HMDB0011130		-1.9989	2.4972		-2.0965	-0.7506	-0.4506	-1.222	-0.9195	-0.5308		Lipid	Lysophospholipid	100001461
	2670			2-stearoyl-GPE (18:0)*		HMDB0011129		-2.4037	2.1248		-2.0028	-0.7194	-0.4107	-1.2994	-0.9112	-1.7038		Lipid	Lysophospholipid	100003901
	2671			1-oleoyl-GPE (18:1)		HMDB0011506		-2.1461	1.8847		0.2524	0.7689	0.7986	0.5793	0.5226	0.2735		Lipid	Lysophospholipid	100001569
	2672			2-oleoyl-GPE (18:1)*		HMDB11476		-2.1282	2.007		-0.6957	0.5818	0.4633	-0.3075	-0.1856	-1.5087		Lipid	Lysophospholipid	100001651
	2673			1-linoleoyl-GPE (18:2)*		HMDB0011507		-2.178	1.9033		0.1578	0.9061	1.2632	1.0248	1.2167	0.8265		Lipid	Lysophospholipid	100001570
	2674			2-linoleoyl-GPE (18:2)*		HMDB11477		-2.1157	2.0452		-0.8612	0.8261	0.6198	0.1959	0.4461	-0.5961		Lipid	Lysophospholipid	100001776
	2675			1-linolenoyl-GPE (18:3)*		HMDB0011509 HMDB0011479			1.8286		0.3281	0.7086	1.0081	0.88	1.4712	0.9559		Lipid	Lysophospholipid	100005714
	2683			1-dihomo-linolenoyl-GPE (20:3n3 or 6)*				-2.2149	1.9692		-0.2175	0.7228	1.574	0.6676	0.757	-0.5314		Lipid	Lysophospholipid	100005371
	2686			1-arachidonoyl-GPE (20:4n6)*		HMDB0011517		-2.0559	2.0025		-1.3527	-0.1674	-0.0886	-0.5451	-0.7471	-0.6631		Lipid	Lysophospholipid	100001571
	2687			2-arachidonoyl-GPE (20:4)*		HMDB0011487		-1.9654	2.1472		-6.9783	-0.4866	-0.0052	-0.7643	-0.4287	-1.5022		Lipid	Lysophospholipid	100001674
	2697			1-docosahexaenoyl-GPE (22:6)*		HMDB11496		-2.0076	1.7905		-0.2398	0.5512	-1.0717	-1.2417	0.7861	0.6074		Lipid	Lysophospholipid	100002060
	2698			2-docosahexaenoyl-GPE (22:6)*		HMDB0011496			1.7479									Lipid	Lysophospholipid	100002061
	2708			1-palmitoyl-GPG (16:0)*					2.0105									Lipid	Lysophospholipid	100005717
	2713			1-oleoyl-GPG (18:1)*														Lipid	Lysophospholipid	100005716
	2715			1-linoleoyl-GPG (18:2)*				-2.3802	2.0235		0.1117	1.1558	0.6773	0.5931	0.7193	-0.3314		Lipid	Lysophospholipid	100009227
	2717			1-palmitoyl-GPI (16:0)		HMDB0061695			2.3049									Lipid	Lysophospholipid	100001655
	2721			1-stearoyl-GPI (18:0)		HMDB0240261		-1.6071	2.4427		-0.8804	0.5382	1.9348	0.6404	0.3899	-1.0235		Lipid	Lysophospholipid	100000656
	2722			2-stearoyl-GPI (18:0)*					1.8029		-0.3301	0.8499	1.5767	0.8358	0.8029	-0.0027		Lipid	Lysophospholipid	100003008
	2723			1-oleoyl-GPI (18:1)		HMDB0061693			1.8796		0.0068	0.4409	1.3258	0.4045	0.57	-1.1107		Lipid	Lysophospholipid	100001777
	2725			1-linoleoyl-GPI (18:2)*				-1.9966	2.0537									Lipid	Lysophospholipid	100001778
	2731			1-arachidonoyl-GPI (20:4)*		HMDB0061690		-1.8426	2.1504									Lipid	Lysophospholipid	100001654
	2789		Plasmalogen	1-palmityl-2-palmitoyl-GPC (O-16:0/16:0)*				-2.0537	2.0272		-1.9956	-1.0827	0.7607	-0.3157	-0.1721	-0.9156		Lipid	Plasmalogen	100015586
[truncated: 377 more rows]
